# Supplementary material for: Expanding the Role of FurA as Essential Global Regulator in Cyanobacteria
Source: PubMed Central journal article supplement (PMC4788461; doi:10.1371/journal.pone.0151384), 2016-03-11
Supplement: pone.0151384.s001.pdf [file pone.0151384.s001.pdf]

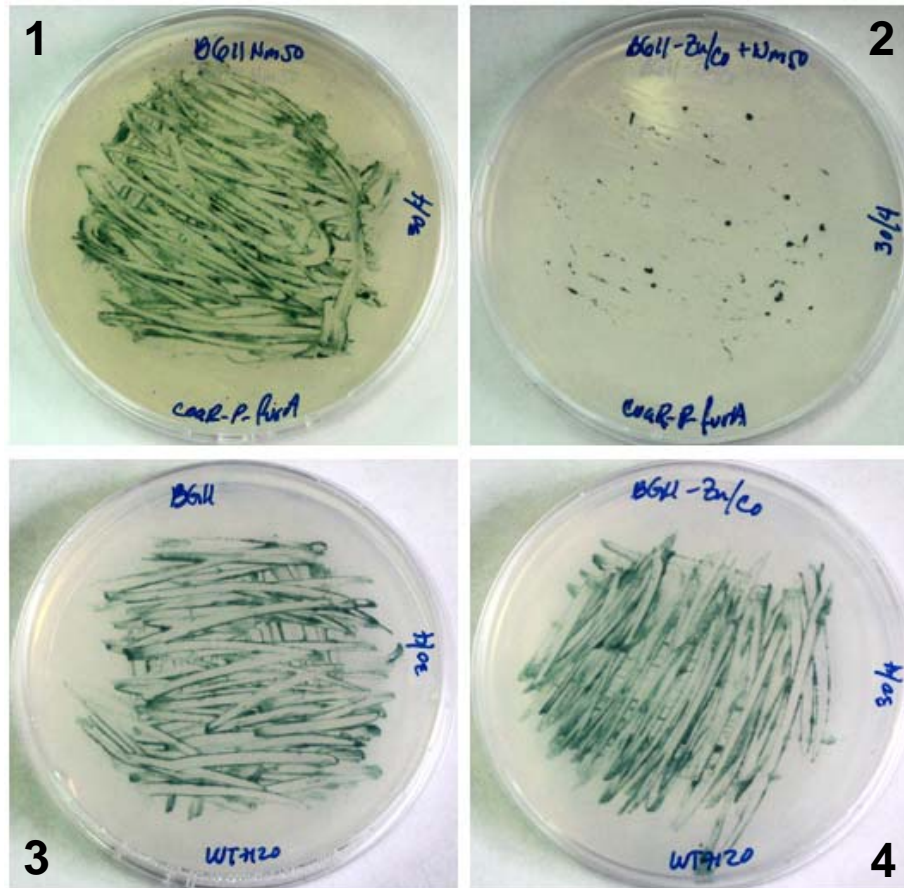

**Figure A. Expression of FurA results essential to the growth of *Anabaena* sp. under standard culture conditions.**

The *coaR-P<sub>coaT</sub>::furA* fusion strain *Anabaena* sp. AGcoaRFurA (1) and the wild-type strain *Anabaena* sp. PCC 7120 (3) grew abundantly in standard BG-11 medium solidified with 1% Noble agar, forming a confluent grow on the agar in 10-14 days. The elimination of cobalt and zinc from de culture medium impaired growth of the *coaR-P<sub>coaT</sub>::furA* fusion strain (2), but not in the case of the wild-type strain (4).

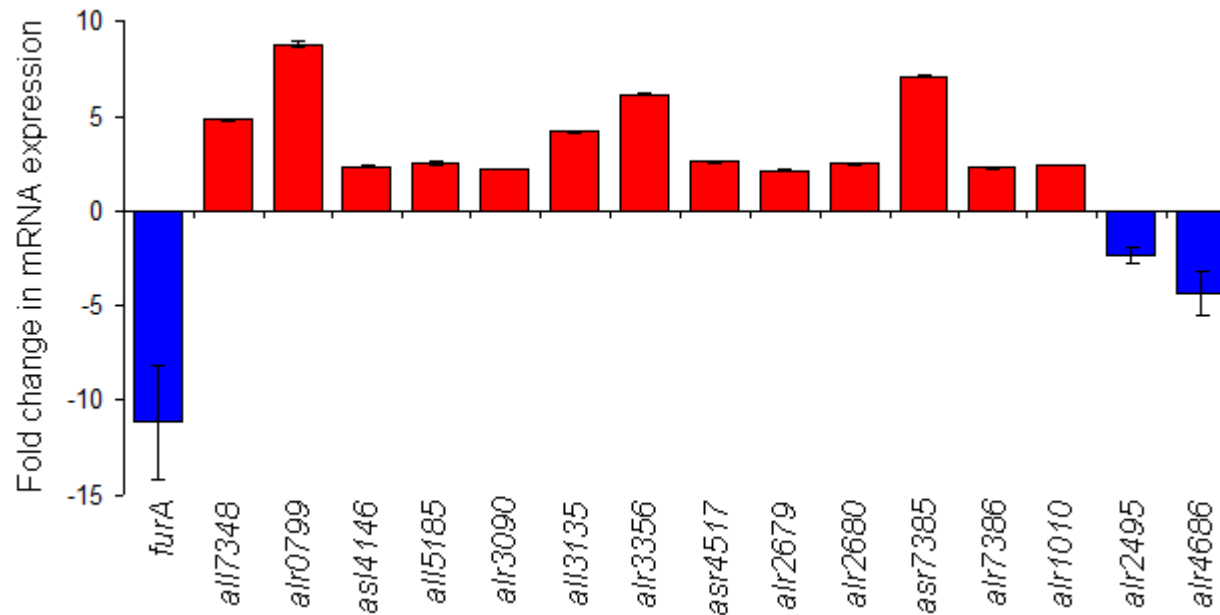

**Figure B. Fold changes in the expression of Fura direct targets in the *furA*-turning off strain *Anabaena* sp. AGcoaRFurA after cobalt/zinc deprivation as compared with the wild-type PCC 7120 strain under the same growth condition, as result of semi-quantitative RT-PCR analyses.**

Signal assigned to each gene corresponded to the intensity of DNA band in the agarose gel stained with ethidium bromide, normalized to the signal observed for housekeeping gene *rnpB* in each condition. Values are means of three independent determination  $\pm$  SD.

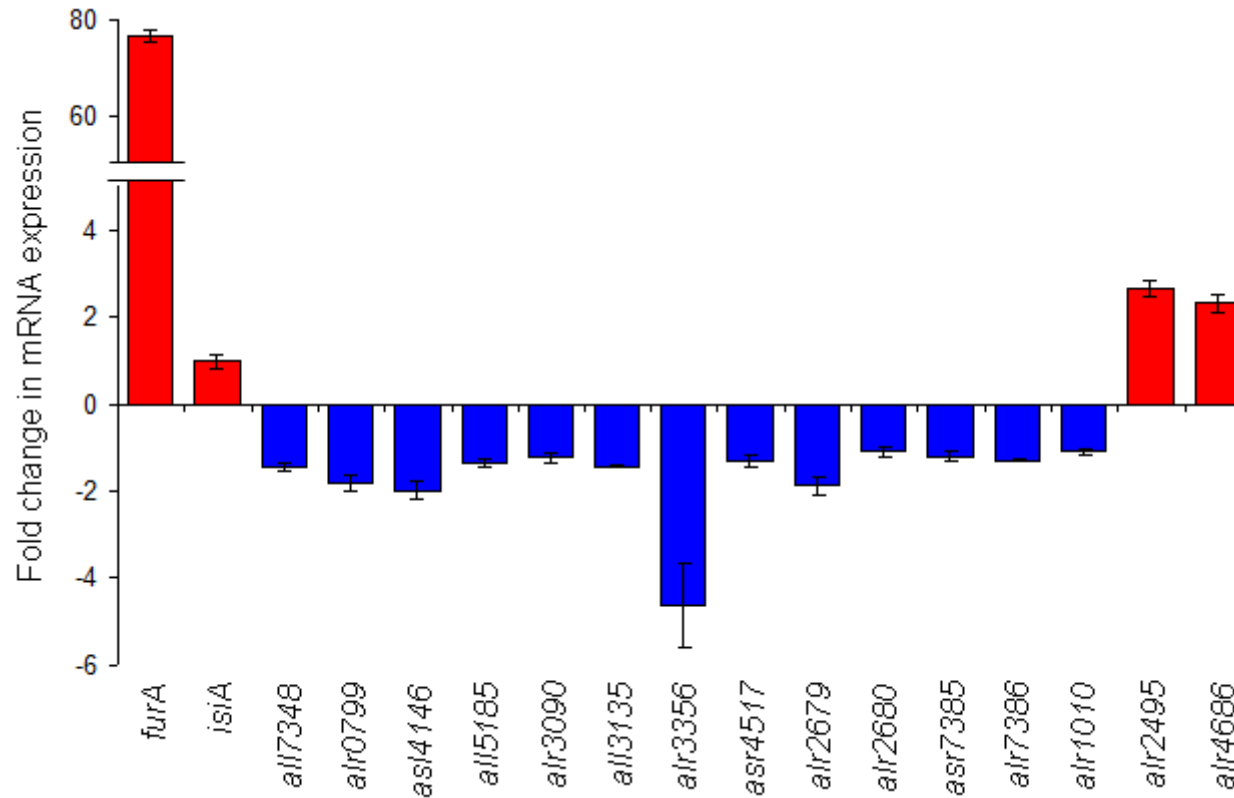

**Figure C. Fold changes in the expression of FurA direct targets in the *furA*-overexpressing strain *Anabaena* sp. AG2770FurA under iron-replete condition (BG-11 medium) as compared with the wild-type PCC 7120 strain under the same growth condition, as result of semi-quantitative RT-PCR analyses.**

Signal assigned to each gene corresponded to the intensity of DNA band in the agarose gel stained with ethidium bromide, normalized to the signal observed for housekeeping gene *rnpB* in each condition. Values are means of three independent determination  $\pm$  SD.

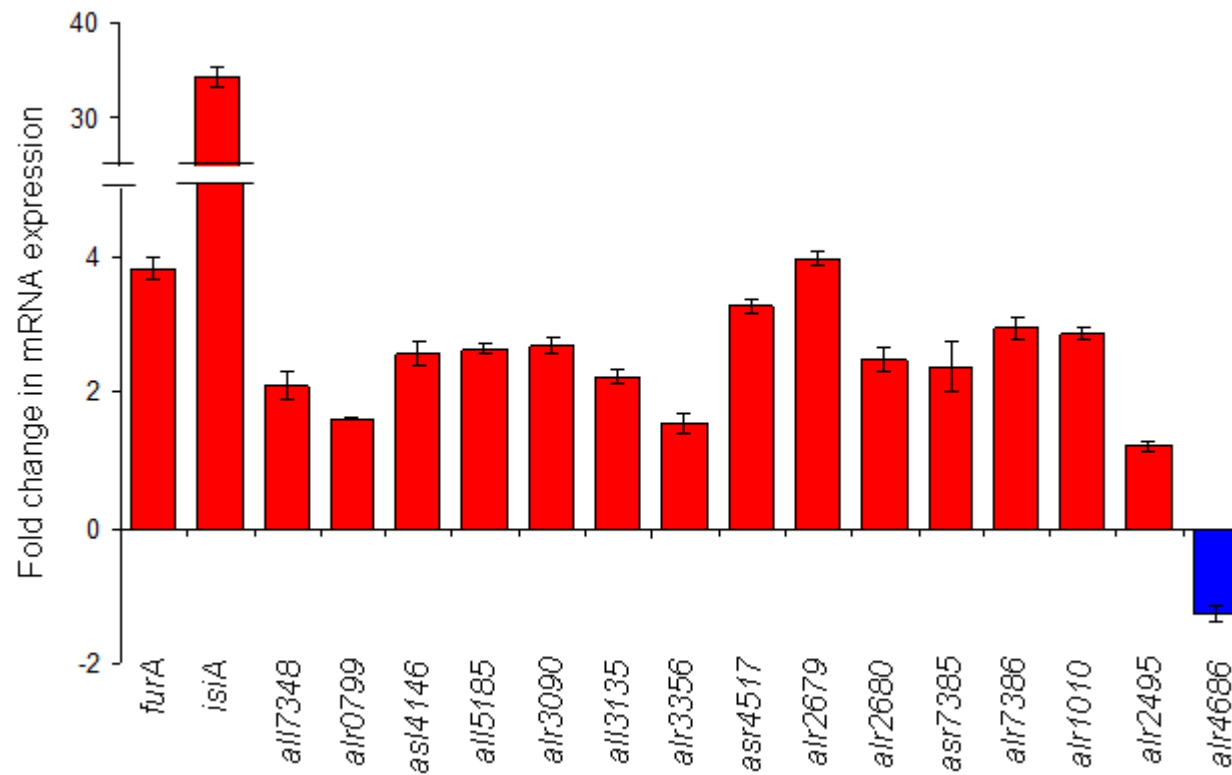

**Figure D. Fold changes in the expression of FurA direct targets in the wild-type strain *Anabaena* sp. PCC 7120 after iron deprivation as compared with the same strain under iron-replete condition (BG-11 medium), as result of semi-quantitative RT-PCR analyses.**

Signal assigned to each gene corresponded to the intensity of DNA band in the agarose gel stained with ethidium bromide, normalized to the signal observed for housekeeping gene *rnpB* in each condition. Values are means of three independent determination  $\pm$  SD.

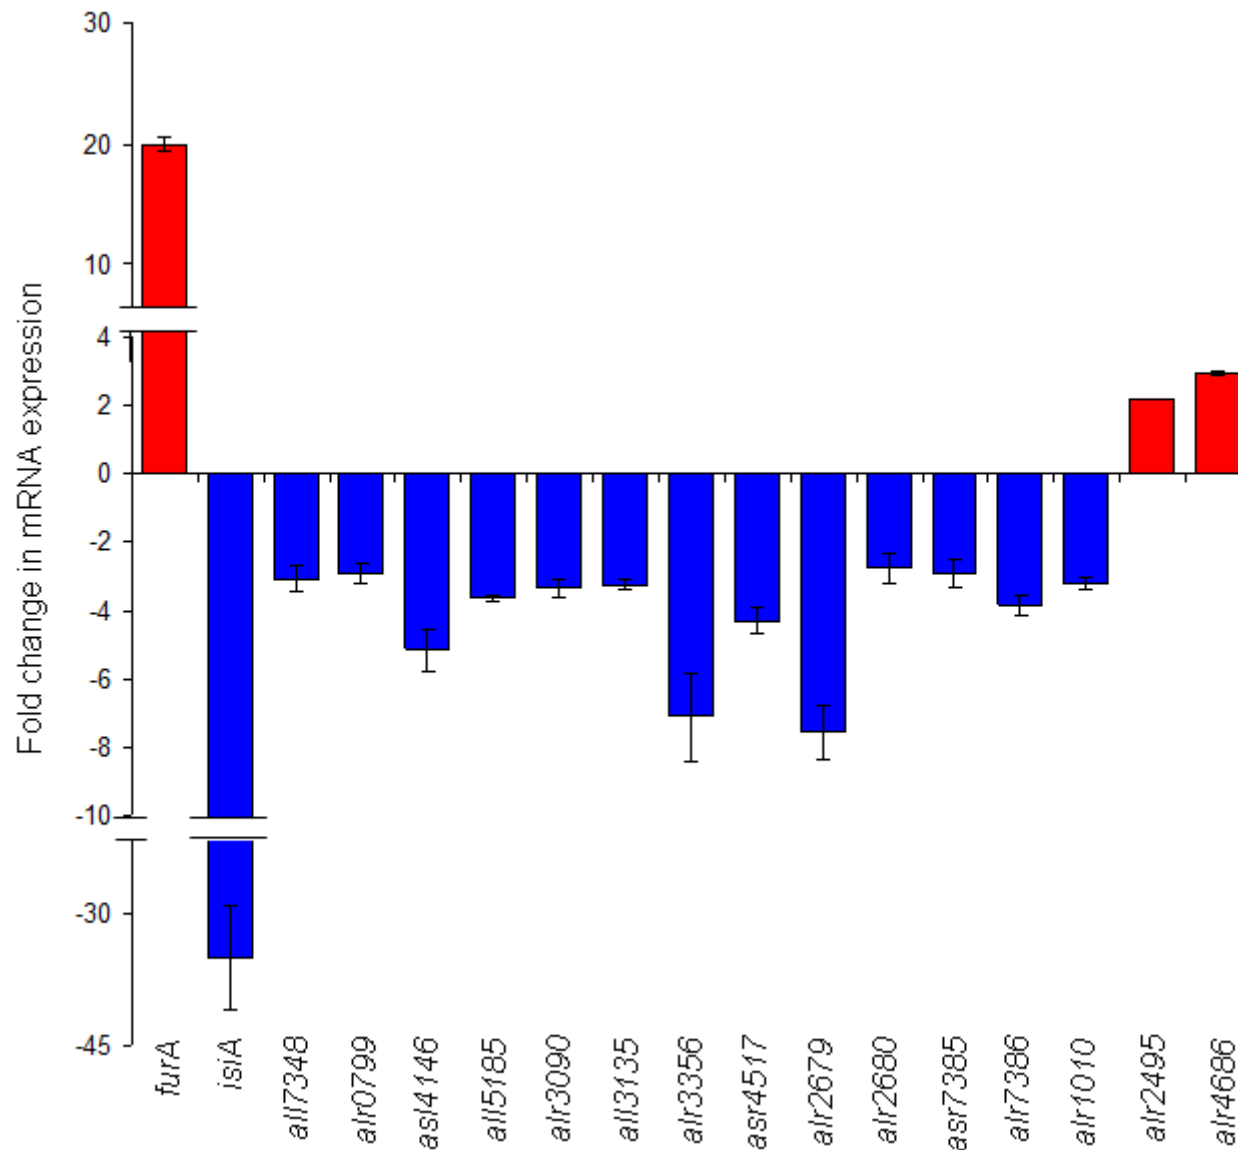

**Figure E. Fold changes in the expression of FurA direct targets in the *furA*-overexpressing strain *Anabaena* sp. AG2770FurA under iron-replete condition (BG-11 medium) as compared with the wild-type PCC 7120 strain grown under iron deprivation, as result of semi-quantitative RT-PCR analyses.**

Signal assigned to each gene corresponded to the intensity of DNA band in the agarose gel stained with ethidium bromide, normalized to the signal observed for housekeeping gene *rnpB* in each condition. Values are means of three independent determination  $\pm$  SD.

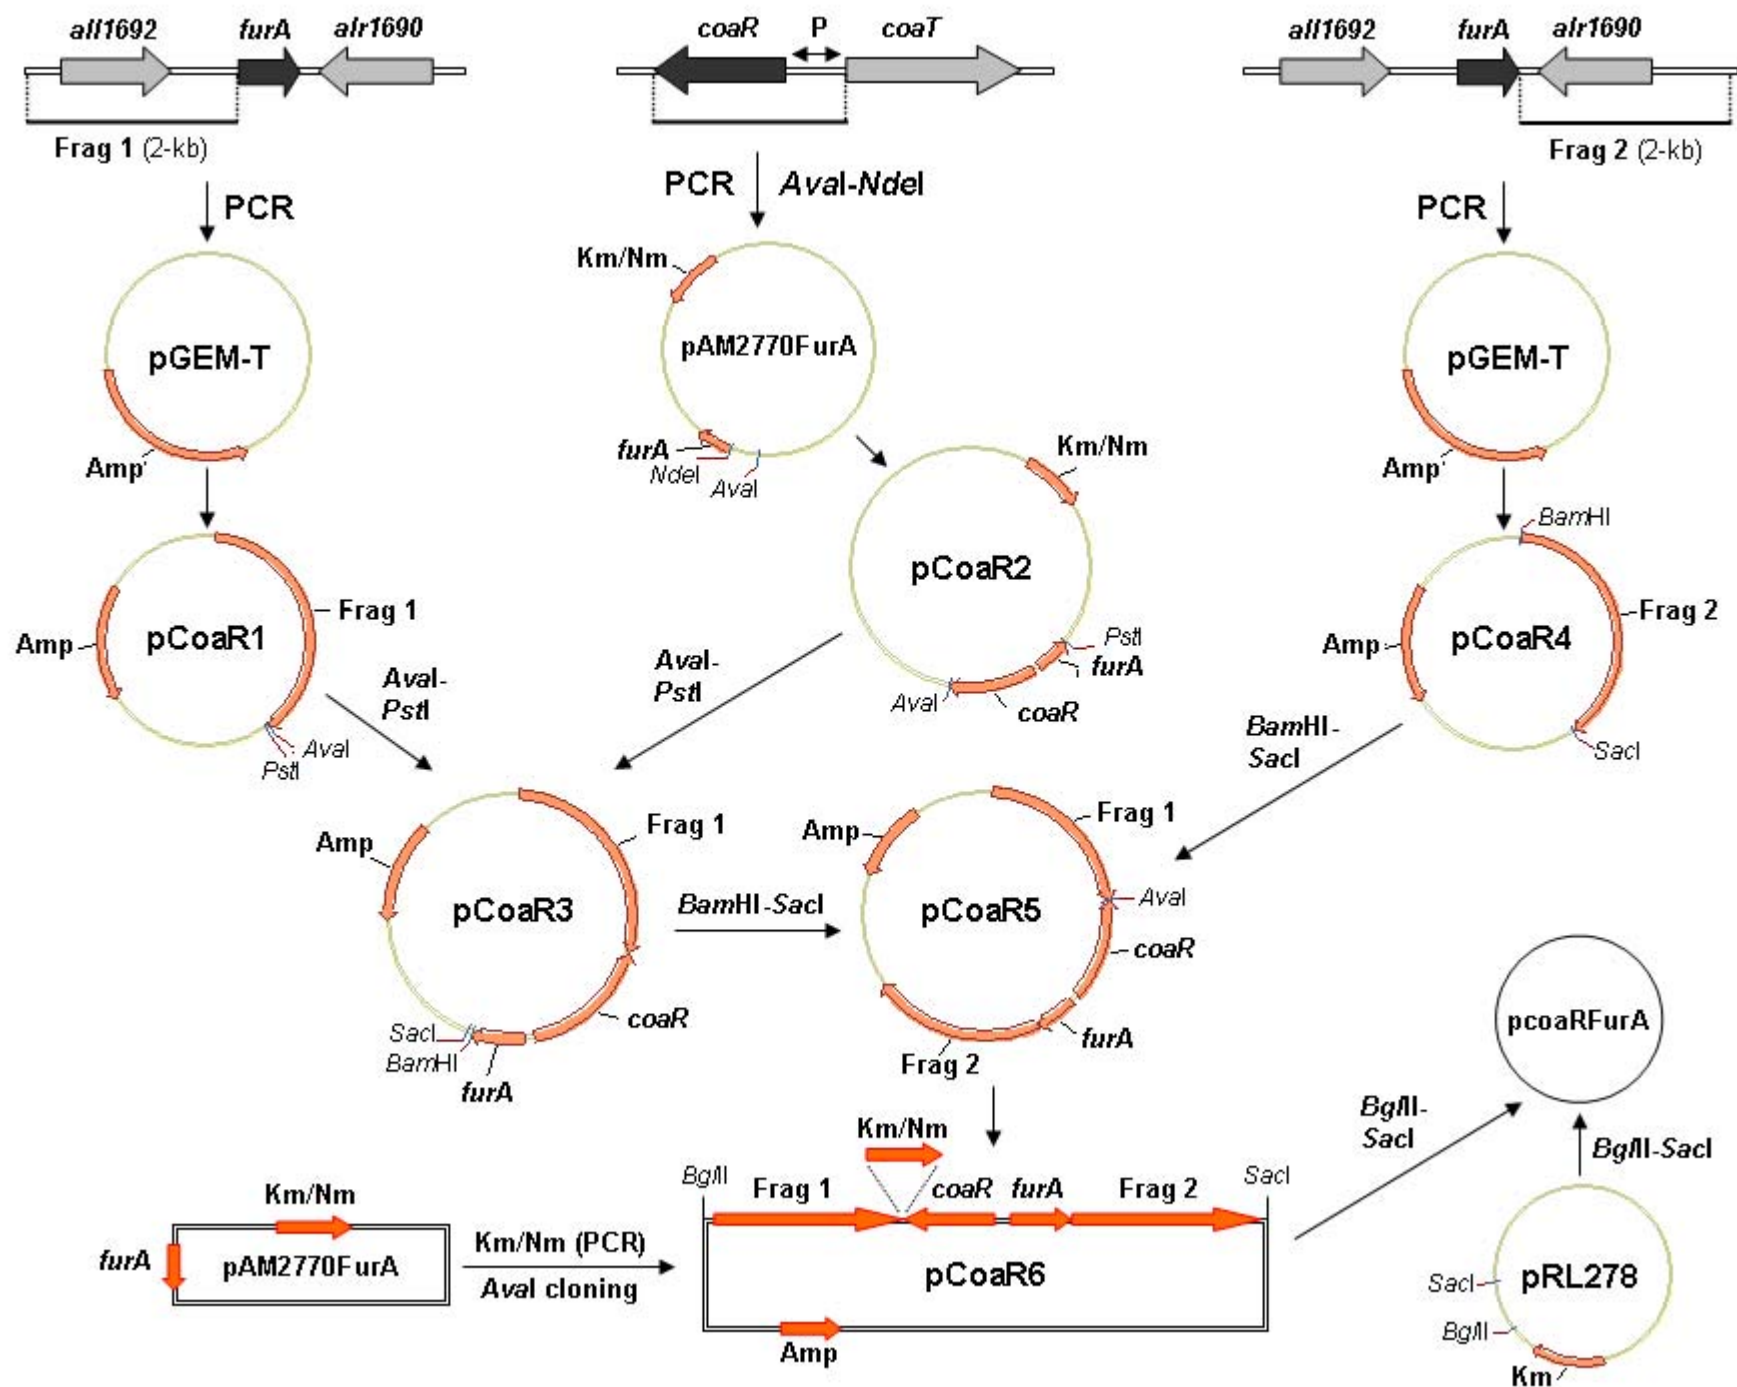

Figure F. Construction of *Anabaena* sp. strain AGcoaRFurA

**Table A. Protein sequences producing significant alignments ( $\geq 80\%$  identity) with FurA from *Anabaena* sp. PCC 7120<sup>a</sup>**

| Description                                                                                      | Max score | Total score | Query cover | E value | Identity | NCBI Accession | Cyanobacteria family     |
|--------------------------------------------------------------------------------------------------|-----------|-------------|-------------|---------|----------|----------------|--------------------------|
| MULTISPECIES: Fur family transcriptional regulator [ <i>Nostocaceae</i> ]                        | 314       | 314         | 100%        | 3e-109  | 100%     | WP_010995860.1 | <i>Nostocaceae</i>       |
| Fur family transcriptional regulator [ <i>Nodularia spumigena</i> ]                              | 310       | 310         | 100%        | 1e-107  | 98%      | WP_006197697.1 | <i>Nostocaceae</i>       |
| Fur family transcriptional regulator [ <i>Nostoc punctiforme</i> ]                               | 308       | 308         | 100%        | 8e-107  | 97%      | WP_012407750.1 | <i>Nostocaceae</i>       |
| ferric uptake regulator family protein [ <i>Nostoc</i> sp. PCC 7107]                             | 307       | 307         | 100%        | 2e-106  | 97%      | WP_015115240.1 | <i>Nostocaceae</i>       |
| Fe <sup>2+</sup> /Zn <sup>2+</sup> uptake regulation protein [ <i>Nostoc</i> sp. PCC 7524]       | 305       | 305         | 100%        | 8e-106  | 97%      | WP_015136707.1 | <i>Nostocaceae</i>       |
| Fe <sup>2+</sup> /Zn <sup>2+</sup> uptake regulation protein [ <i>Cylindrospermum stagnale</i> ] | 305       | 305         | 100%        | 1e-105  | 97%      | WP_015208849.1 | <i>Nostocaceae</i>       |
| Fur family transcriptional regulator [ <i>Aphanizomenon flos-aquae</i> ]                         | 302       | 302         | 100%        | 1e-104  | 95%      | WP_027404555.1 | <i>Nostocaceae</i>       |
| ferric uptake regulator family protein [ <i>Anabaena</i> sp. 90]                                 | 301       | 301         | 100%        | 3e-104  | 95%      | WP_015080256.1 | <i>Nostocaceae</i>       |
| Fur family transcriptional regulator [ <i>Dolichospermum circinale</i> ]                         | 301       | 301         | 100%        | 3e-104  | 95%      | WP_028084223.1 | <i>Nostocaceae</i>       |
| ferric uptake regulator family protein [ <i>Calothrix</i> sp. PCC 7507]                          | 302       | 302         | 100%        | 2e-104  | 94%      | WP_015129343.1 | <i>Rivulariaceae</i>     |
| Fur family transcriptional regulator [ <i>Microchaete</i> sp. PCC 7126]                          | 301       | 301         | 100%        | 3e-104  | 94%      | WP_017653552.1 | <i>Microchaetaceae</i>   |
| ferric uptake regulator family protein [ <i>Calothrix parietina</i> ]                            | 300       | 300         | 100%        | 9e-104  | 94%      | WP_015198567.1 | <i>Rivulariaceae</i>     |
| Fur family transcriptional regulator [ <i>Anabaena</i> sp. PCC 7108]                             | 299       | 299         | 100%        | 2e-103  | 94%      | WP_016951304.1 | <i>Nostocaceae</i>       |
| ferric uptake regulator, Fur family [ <i>Anabaena cylindrica</i> ]                               | 298       | 298         | 100%        | 4e-103  | 94%      | WP_015214948.1 | <i>Nostocaceae</i>       |
| Fur family transcriptional regulator [ <i>Fischerella</i> sp. PCC 9605]                          | 301       | 301         | 100%        | 7e-104  | 93%      | WP_026735411.1 | <i>Fischerellaceae</i>   |
| Fur family transcriptional regulator [ <i>Trichormus azollae</i> ]                               | 296       | 296         | 100%        | 6e-102  | 93%      | WP_013190079.1 | <i>Nostocaceae</i>       |
| Fur family transcriptional regulator [ <i>Fischerella muscicola</i> ]                            | 298       | 298         | 100%        | 5e-103  | 93%      | WP_016870366.1 | <i>Fischerellaceae</i>   |
| Fur family transcriptional regulator [ <i>Fischerella</i> sp. PCC 9431]                          | 297       | 297         | 100%        | 1e-102  | 92%      | WP_026722649.1 | <i>Fischerellaceae</i>   |
| Fur family transcriptional regulator [ <i>Calothrix</i> sp. PCC 7103]                            | 295       | 295         | 100%        | 1e-101  | 92%      | WP_019493338.1 | <i>Rivulariaceae</i>     |
| Fur family transcriptional regulator [ <i>Mastigocladopsis repens</i> ]                          | 293       | 293         | 100%        | 9e-101  | 92%      | WP_017316719.1 | <i>Symphyonemataceae</i> |
| Fur family transcriptional regulator [ <i>Calothrix</i> sp. 336/3]                               | 275       | 275         | 100%        | 1e-93   | 92%      | KFB85589.1     | <i>Rivulariaceae</i>     |

|                                                                                                   |     |     |      |        |     |                |                             |
|---------------------------------------------------------------------------------------------------|-----|-----|------|--------|-----|----------------|-----------------------------|
| Fur family transcriptional regulator [[ <i>Scytonema hofmanni</i> ] UTEX 2349]                    | 297 | 297 | 100% | 2e-102 | 91% | WP_029637742.1 | <i>Scytonemataceae</i>      |
| MULTISPECIES: Fur family transcriptional regulator [ <i>Fischerella</i> ]                         | 295 | 295 | 100% | 1e-101 | 91% | WP_009458621.1 | <i>Fischerellaceae</i>      |
| Fur family transcriptional regulator [ <i>Fischerella</i> sp. PCC 9339]                           | 296 | 296 | 100% | 4e-102 | 91% | WP_017309854.1 | <i>Fischerellaceae</i>      |
| Fur family transcriptional regulator [ <i>Chlorogloeopsis</i> sp. PCC 7702]                       | 295 | 295 | 100% | 1e-101 | 90% | WP_017319714.1 | <i>Chlorogloeopsidaceae</i> |
| Fur family transcriptional regulator [ <i>Chlorogloeopsis fritschii</i> ]                         | 294 | 294 | 100% | 2e-101 | 90% | WP_016877311.1 | <i>Chlorogloeopsidaceae</i> |
| Ferric uptake regulation protein FUR [ <i>Richelia intracellularis</i> ]                          | 266 | 266 | 100% | 4e-90  | 89% | CDN15517.1     | <i>Nostocaceae</i>          |
| Fur family transcriptional regulator [ <i>Scytonema hofmanni</i> ]                                | 290 | 290 | 100% | 2e-99  | 89% | WP_017749066.1 | <i>Scytonemataceae</i>      |
| Fur family transcriptional regulator [ <i>Raphidiopsis brookii</i> ]                              | 285 | 285 | 100% | 1e-97  | 89% | WP_009343575.1 | <i>Nostocaceae</i>          |
| ferric uptake regulator, Fur family [ <i>Gloeocapsa</i> sp. PCC 7428]                             | 286 | 286 | 100% | 2e-98  | 89% | WP_015188759.1 | <i>Microcystaceae</i>       |
| Fe <sup>2+</sup> /Zn <sup>2+</sup> uptake regulation protein [ <i>Rivularia</i> sp. PCC 7116]     | 286 | 286 | 100% | 4e-98  | 88% | WP_015117423.1 | <i>Rivulariaceae</i>        |
| Fur family transcriptional regulator [ <i>Cylindrospermopsis raciborskii</i> ]                    | 283 | 283 | 100% | 6e-97  | 88% | WP_006277045.1 | <i>Nostocaceae</i>          |
| Fur family transcriptional regulator [ <i>Mastigocoleus testarum</i> ]                            | 283 | 283 | 100% | 4e-97  | 87% | WP_027843573.1 | <i>Nostochopsidaceae</i>    |
| ferric uptake regulator family protein [ <i>Chroococciopsis thermalis</i> ]                       | 276 | 276 | 100% | 2e-94  | 85% | WP_015152359.1 | <i>Xenococcaceae</i>        |
| Fe <sup>2+</sup> /Zn <sup>2+</sup> uptake regulation protein [ <i>Synechocystis</i> sp. PCC 7509] | 273 | 273 | 100% | 8e-93  | 84% | WP_009631818.1 | <i>Merismopediaceae</i>     |
| Fe <sup>2+</sup> /Zn <sup>2+</sup> uptake regulation protein [ <i>Oscillatoria acuminata</i> ]    | 269 | 269 | 100% | 2e-91  | 82% | WP_015150141.1 | <i>Oscillatoriaceae</i>     |
| Fur family transcriptional regulator [ <i>Geitlerinema</i> sp. PCC 7105]                          | 264 | 264 | 99%  | 1e-89  | 81% | WP_026097494.1 | <i>Pseudanabaenaceae</i>    |
| Fur family transcriptional regulator [ <i>Leptolyngbya boryana</i> ]                              | 258 | 258 | 98%  | 3e-87  | 81% | WP_017285907.1 | <i>Pseudanabaenaceae</i>    |
| ferric uptake regulator family protein [ <i>Crinalium epipsammum</i> ]                            | 264 | 264 | 100% | 2e-89  | 80% | WP_015203706.1 | <i>Gomontiellaceae</i>      |

<sup>a</sup>Protein sequences alignments were performed using the Basic Local Alignment Search Tool (BLAST) from NCBI.



**Table B. Complete list of genes showing  $\geq 2$ -fold change in expression in the *furA*-turning off strain AGcoaRFurA**

| ORF            | RPKM (WT) | RPKM (FurA <sup>-</sup> ) | Fold change | Protein description                          | Functional category                                          |
|----------------|-----------|---------------------------|-------------|----------------------------------------------|--------------------------------------------------------------|
| <i>all8559</i> | 34,862    | 0,872                     | -39,965     | transposase                                  | transposon-related functions                                 |
| <i>asr2389</i> | 34,454    | 0,000                     | -34,454     | unknown                                      | unknown                                                      |
| <i>all4671</i> | 19,260    | 0,949                     | -20,300     | metal dependent phosphohydrolase             | other enzymes                                                |
| <i>all4063</i> | 18,223    | 0,000                     | -18,223     | phosphatidylglycerophosphate synthase        | lipid metabolism                                             |
| <i>all7234</i> | 3,831     | 0,224                     | -17,128     | TPR repeat-containing protein                | unknown                                                      |
| <i>asr7638</i> | 16,167    | 0,000                     | -16,167     | heavy metal transport/detoxification protein | transport across membrane                                    |
| <i>alr2725</i> | 6,081     | 0,383                     | -15,859     | deoxyribopyrimidine photolyase               | DNA replication, recombination and repair                    |
| <i>asl7327</i> | 14,827    | 0,000                     | -14,827     | unknown                                      | unknown                                                      |
| <i>asr3168</i> | 14,780    | 0,000                     | -14,780     | ribosomal protein PSRP-3/Ycf65               | ribosome component                                           |
| <i>asr7256</i> | 14,153    | 0,000                     | -14,153     | unknown                                      | unknown                                                      |
| <i>alr4311</i> | 20,387    | 1,461                     | -13,956     | ABC transporter, ATP-binding protein         | transport across membrane                                    |
| <i>all4414</i> | 3,701     | 0,265                     | -13,956     | dynammin-like protein (GTPase)               | membrane invaginations, membrane fusions                     |
| <i>alr4716</i> | 5,228     | 0,392                     | -13,322     | two-component sensor histidine kinase        | regulatory functions                                         |
| <i>all1884</i> | 10,754    | 0,807                     | -13,322     | short-chain dehydrogenase/reductase SDR      | redox reactions                                              |
| <i>all7619</i> | 4,090     | 0,322                     | -12,687     | unknown                                      | unknown                                                      |
| <i>all1802</i> | 5,248     | 0,414                     | -12,687     | Na <sup>+</sup> -transporting ATP synthase   | transport across membrane                                    |
| <i>asl8028</i> | 12,384    | 0,000                     | -12,384     | unknown                                      | unknown                                                      |
| <i>asl0597</i> | 12,219    | 0,000                     | -12,219     | unknown                                      | unknown                                                      |
| <i>asr2388</i> | 37,601    | 3,120                     | -12,053     | unknown                                      | unknown                                                      |
| <i>alr0556</i> | 10,902    | 0,904                     | -12,053     | DegT/DnrJ/EryC1/StrS aminotransferase        | cell envelope                                                |
| <i>all0378</i> | 5,215     | 0,457                     | -11,419     | sodium-dependent nucleoside transporter      | salvage pathways                                             |
| <i>asr3468</i> | 11,120    | 0,000                     | -11,120     | unknown                                      | unknown                                                      |
| <i>all0539</i> | 10,963    | 0,000                     | -10,963     | unknown                                      | unknown                                                      |
| <i>alr3177</i> | 6,321     | 0,586                     | -10,784     | probable glycosyl transferase                | sugars                                                       |
| <i>all4797</i> | 11,608    | 1,076                     | -10,784     | unknown                                      | unknown                                                      |
| <i>alr1347</i> | 11,089    | 1,028                     | -10,784     | unknown                                      | unknown                                                      |
| <i>alr7243</i> | 3,078     | 0,303                     | -10,150     | ankyrin                                      | attachment of integral membrane proteins to the cytoskeleton |
| <i>alr3138</i> | 10,321    | 1,017                     | -10,150     | peptidase M22, glycoprotease                 | degradation of proteins, peptides, and glycopeptides         |
| <i>alr0201</i> | 16,453    | 1,673                     | -9,833      | translation factor SUA5                      | translation                                                  |
| <i>all3976</i> | 4,102     | 0,431                     | -9,516      | seryl-tRNA synthetase; SerS                  | aminoacyl tRNA synthetases and tRNA modification             |
| <i>all3579</i> | 11,227    | 1,180                     | -9,516      | unknown                                      | unknown                                                      |
| <i>alr1379</i> | 6,815     | 0,716                     | -9,516      | unknown                                      | unknown                                                      |

|                |         |        |        |                                                |                                                |
|----------------|---------|--------|--------|------------------------------------------------|------------------------------------------------|
| <i>all2853</i> | 5,197   | 0,546  | -9,516 | UDP-glucose 4-epimerase                        | sugars                                         |
| <i>alr1298</i> | 20,155  | 2,191  | -9,198 | pentapeptide repeat-containing protein         | unknown                                        |
| <i>asr7603</i> | 9,122   | 0,000  | -9,122 | unknown                                        | unknown                                        |
| <i>all2934</i> | 4,880   | 0,549  | -8,881 | glutaminase                                    | amino acids biosynthesis and metabolism        |
| <i>alr7241</i> | 2,903   | 0,327  | -8,881 | reverse transcriptase homolog                  | transposon-related functions                   |
| <i>all3093</i> | 3,224   | 0,363  | -8,881 | bifunctional purine biosynthesis protein, PurH | purine/pyrimidine biosynthesis and metabolism  |
| <i>all4689</i> | 9,616   | 1,083  | -8,881 | unknown                                        | unknown                                        |
| <i>alr3496</i> | 14,214  | 1,600  | -8,881 | unknown                                        | unknown                                        |
| <i>asl2779</i> | 33,360  | 3,756  | -8,881 | unknown                                        | unknown                                        |
| <i>asr3796</i> | 8,812   | 0,000  | -8,812 | stress induced hydrophobic peptide             | resistance, adaptations to atypical conditions |
| <i>asr3080</i> | 8,585   | 0,000  | -8,585 | unknown                                        | unknown                                        |
| <i>all3876</i> | 15,684  | 1,831  | -8,564 | precorrin decarboxylase, CbiT subunit          | cobalamin, heme, phycobilin and porphyrin      |
|                |         |        |        | chromosome partitioning protein, ParA family   |                                                |
| <i>alr8562</i> | 12,712  | 1,484  | -8,564 | ATPase                                         | nucleoproteins                                 |
|                |         |        |        | fdxN element excision controlling factor XisI  |                                                |
| <i>alr0084</i> | 74,134  | 8,765  | -8,458 | homolog                                        | heterocyst differentiation                     |
| <i>all4699</i> | 5,345   | 0,648  | -8,247 | prolipoprotein diacylglyceryl transferase      | lipoprotein biogenesis                         |
| <i>alr5324</i> | 2,357   | 0,286  | -8,247 | penicillin-binding protein                     | surface components                             |
| <i>all4950</i> | 5,750   | 0,697  | -8,247 | unknown                                        | unknown                                        |
| <i>all1380</i> | 7,865   | 0,954  | -8,247 | unknown                                        | unknown                                        |
| <i>alr7206</i> | 1,615   | 0,196  | -8,247 | unknown                                        | unknown                                        |
| <i>asl1262</i> | 7,997   | 0,000  | -7,997 | unknown                                        | unknown                                        |
| <i>alr0296</i> | 28,511  | 3,567  | -7,993 | unknown                                        | unknown                                        |
| <i>all4813</i> | 391,322 | 49,235 | -7,948 | serine/threonine kinase                        | regulatory functions                           |
| <i>all0498</i> | 7,371   | 0,930  | -7,930 | DegT/DnrJ/EryC1/StrS family                    | cell envelope                                  |
| <i>alr4069</i> | 7,847   | 0,990  | -7,930 | permease YjgP/YjgQ                             | transport across membrane                      |
| <i>alr3304</i> | 467,044 | 59,090 | -7,904 | unknown                                        | unknown                                        |
| <i>asr2155</i> | 7,889   | 0,000  | -7,889 | unknown                                        | unknown                                        |
| <i>all4960</i> | 6,438   | 0,823  | -7,824 | ABC-1 domain protein                           | protein amino acid phosphorylation             |
| <i>asl2942</i> | 7,784   | 0,000  | -7,784 | unknown                                        | unknown                                        |
| <i>alr1104</i> | 7,733   | 0,000  | -7,733 | unknown                                        | unknown                                        |
| <i>all3963</i> | 7,711   | 0,000  | -7,711 | unknown                                        | unknown                                        |
| <i>all1618</i> | 66,984  | 8,719  | -7,683 | unknown                                        | unknown                                        |
| <i>all3634</i> | 3,969   | 0,521  | -7,612 | similar to esterase                            | lipid metabolism                               |
| <i>alr1853</i> | 7,374   | 0,969  | -7,612 | transposase                                    | transposon-related functions                   |
| <i>all4962</i> | 3,328   | 0,437  | -7,612 | unknown                                        | unknown                                        |
| <i>asl2451</i> | 18,197  | 2,390  | -7,612 | unknown                                        | unknown                                        |
| <i>all3392</i> | 4,038   | 0,530  | -7,612 | cobalamin synthesis protein CobW               | cobalamin, heme, phycobilin and porphyrin      |
| <i>asr4076</i> | 19,460  | 2,556  | -7,612 | unknown                                        | unknown                                        |
|                |         |        |        | chromosome partitioning protein, ParA family   |                                                |
| <i>alr9026</i> | 5,410   | 0,711  | -7,612 | ATPase                                         | nucleoproteins                                 |
| <i>all3836</i> | 41,083  | 5,454  | -7,533 | glucose 1-dehydrogenase (NAD+)                 | sugars                                         |

|                |         |         |        |                                                                             |                                                                    |
|----------------|---------|---------|--------|-----------------------------------------------------------------------------|--------------------------------------------------------------------|
| <i>all2012</i> | 16,333  | 2,191   | -7,454 | ABC transporter, permease protein                                           | transport across membrane                                          |
| <i>all2645</i> | 5,553   | 0,748   | -7,422 | peptide synthetase                                                          | siderophore/cyanotoxin biosynthesis                                |
| <i>all1686</i> | 13,443  | 1,816   | -7,401 | putative purple acid phosphatase precursor                                  | other enzymes                                                      |
| <i>alr3430</i> | 7,339   | 0,000   | -7,339 | unknown                                                                     | unknown                                                            |
| <i>all0801</i> | 7,298   | 0,000   | -7,298 | photosystem II protein W                                                    | photosynthesis                                                     |
| <i>alr0117</i> | 17,552  | 2,406   | -7,295 | two-component sensor histidine kinase                                       | regulatory functions                                               |
| <i>alr4281</i> | 13,563  | 1,859   | -7,295 | heterocyst specific ABC-transporter, membrane spanning subunit DevC homolog | transport across membrane, heterocyst                              |
| <i>all0495</i> | 18,024  | 2,471   | -7,295 | polysaccharide export protein                                               | exopolysaccharide biosynthesis                                     |
| <i>alr4610</i> | 24,060  | 3,346   | -7,190 | pentapeptide repeat containing protein                                      | unknown                                                            |
| <i>all1848</i> | 14,332  | 1,993   | -7,190 | similar to methyltransferase                                                | other enzymes                                                      |
| <i>asl2437</i> | 7,185   | 0,000   | -7,185 | unknown                                                                     | unknown                                                            |
| <i>asl8515</i> | 7,120   | 0,000   | -7,120 | putative carbohydrate kinase                                                | sugars                                                             |
| <i>asr0148</i> | 7,120   | 0,000   | -7,120 | unknown                                                                     | unknown                                                            |
| <i>alr1105</i> | 7,076   | 0,000   | -7,076 | arsenate reductase                                                          | detoxification                                                     |
| <i>alr3038</i> | 4,052   | 0,581   | -6,978 | putative methyltransferase                                                  | other enzymes                                                      |
| <i>alr5368</i> | 4,103   | 0,588   | -6,978 | sugar ABC transporter, permease protein                                     | transport across membrane                                          |
| <i>all7171</i> | 4,587   | 0,657   | -6,978 | unknown                                                                     | unknown                                                            |
| <i>alr1392</i> | 4,414   | 0,632   | -6,978 | unknown                                                                     | unknown                                                            |
| <i>alr3638</i> | 3,293   | 0,472   | -6,978 | DNA mismatch repair protein                                                 | DNA replication, recombination and repair                          |
| <i>alr3147</i> | 7,832   | 1,122   | -6,978 | phosphoenolpyruvate synthase                                                | pyruvate metabolism and reductive carboxylate cycle (CO2 fixation) |
| <i>all2367</i> | 11,783  | 1,689   | -6,978 | thioredoxin                                                                 | redox homeostasis                                                  |
| <i>all3673</i> | 6,520   | 0,934   | -6,978 | oxidoreductase, molybdopterin binding                                       | redox reactions                                                    |
| <i>all5343</i> | 3,051   | 0,437   | -6,978 | glycosyl transferase                                                        | sugars                                                             |
| <i>alr0812</i> | 5,512   | 0,790   | -6,978 | unknown                                                                     | unknown                                                            |
| <i>alr7656</i> | 8,027   | 1,150   | -6,978 | unknown                                                                     | unknown                                                            |
| <i>asl8021</i> | 15,663  | 2,245   | -6,978 | unknown                                                                     | unknown                                                            |
| <i>asr5054</i> | 35,677  | 5,113   | -6,978 | unknown                                                                     | unknown                                                            |
| <i>all4431</i> | 4,039   | 0,579   | -6,978 | glycosyl transferase                                                        | sugars                                                             |
| <i>all4622</i> | 1,281   | 0,184   | -6,978 | unknown                                                                     | unknown                                                            |
| <i>alr7127</i> | 1,791   | 0,257   | -6,978 | unknown                                                                     | unknown                                                            |
| <i>alr9012</i> | 2,181   | 0,312   | -6,978 | unknown                                                                     | unknown                                                            |
| <i>asl0046</i> | 26,212  | 3,756   | -6,978 | YiaAB two helix domain-containing protein                                   | unknown                                                            |
| <i>asl3322</i> | 6,868   | 0,000   | -6,868 | unknown                                                                     | unknown                                                            |
| <i>all4822</i> | 84,892  | 12,559  | -6,759 | similar to beta-lactamase                                                   | resistance, adaptations to atypical conditions                     |
| <i>asr4498</i> | 6,710   | 0,000   | -6,710 | unknown                                                                     | unknown                                                            |
| <i>all1101</i> | 2,767   | 0,415   | -6,661 | ferrichrome iron receptor                                                   | transport across membrane                                          |
| <i>all4430</i> | 5,560   | 0,835   | -6,661 | probable polysaccharide biosynthesis protein                                | sugars                                                             |
| <i>alr3920</i> | 14,630  | 2,218   | -6,597 | two-component response regulator                                            | regulatory functions                                               |
| <i>alr2411</i> | 707,972 | 107,481 | -6,587 | serine/threonine kinase                                                     | regulatory functions                                               |
| <i>asr1662</i> | 6,560   | 0,000   | -6,560 | unknown                                                                     | unknown                                                            |

|                |        |        |        |                                                                             |                                                                              |
|----------------|--------|--------|--------|-----------------------------------------------------------------------------|------------------------------------------------------------------------------|
| <i>alr2526</i> | 10,837 | 1,653  | -6,555 | luciferase-alpha subunit                                                    | bioluminescence                                                              |
| <i>all3983</i> | 9,026  | 1,377  | -6,555 | similar to surface layer protein                                            | cell envelope                                                                |
| <i>alr3932</i> | 6,543  | 0,000  | -6,543 | unknown                                                                     | unknown                                                                      |
| <i>asl3856</i> | 6,487  | 0,000  | -6,487 | similar to WD repeat protein                                                | regulatory functions                                                         |
| <i>all3169</i> | 4,170  | 0,657  | -6,344 | WD repeat protein with Ser/Thr protein kinase motif                         | regulatory functions<br>degradation of proteins, peptides, and glycopeptides |
| <i>all1862</i> | 3,496  | 0,551  | -6,344 | similar to peptidase                                                        | glycopeptides                                                                |
| <i>alr3425</i> | 3,002  | 0,473  | -6,344 | probable glycosyl transferase                                               | sugars                                                                       |
| <i>all7610</i> | 3,828  | 0,603  | -6,344 | cation efflux system protein                                                | transport across membrane                                                    |
| <i>alr3287</i> | 12,226 | 1,927  | -6,344 | nitrate transport protein NrtB                                              | transport across membrane                                                    |
| <i>alr3648</i> | 3,002  | 0,473  | -6,344 | heterocyst specific ABC-transporter, membrane spanning subunit DevC homolog | transport across membrane, heterocyst                                        |
| <i>all0605</i> | 2,926  | 0,461  | -6,344 | PBS lyase HEAT-like repeat                                                  | energy production and conversion                                             |
| <i>all0921</i> | 9,980  | 1,573  | -6,344 | Rieske (2Fe-2S) domain-containing protein                                   | redox reactions                                                              |
| <i>all3014</i> | 9,650  | 1,521  | -6,344 | glyoxalase/bleomycin resistance protein/dioxygenase                         | resistance, adaptations to atypical conditions                               |
| <i>alr0585</i> | 3,593  | 0,566  | -6,344 | probable glycosyl transferase                                               | sugars                                                                       |
| <i>all5177</i> | 15,673 | 2,471  | -6,344 | molybdenum-pterin binding protein homolog                                   | transport across membrane                                                    |
| <i>alr1635</i> | 2,056  | 0,324  | -6,344 | sulfate permease                                                            | transport across membrane                                                    |
| <i>all2320</i> | 5,897  | 0,930  | -6,344 | unknown                                                                     | unknown                                                                      |
| <i>all3696</i> | 3,073  | 0,484  | -6,344 | unknown                                                                     | unknown                                                                      |
| <i>all4276</i> | 4,615  | 0,727  | -6,344 | unknown                                                                     | unknown                                                                      |
| <i>all4790</i> | 4,200  | 0,662  | -6,344 | unknown                                                                     | unknown                                                                      |
| <i>alr2820</i> | 5,482  | 0,864  | -6,344 | unknown                                                                     | unknown                                                                      |
| <i>alr7189</i> | 2,715  | 0,428  | -6,344 | unknown                                                                     | unknown                                                                      |
| <i>alr7358</i> | 9,812  | 1,547  | -6,344 | unknown                                                                     | unknown                                                                      |
| <i>asr7038</i> | 11,794 | 1,859  | -6,344 | unknown                                                                     | unknown                                                                      |
| <i>alr4576</i> | 5,927  | 0,934  | -6,344 | biotin biosynthesis protein BioY                                            | vitamin biosynthesis                                                         |
| <i>alr3386</i> | 9,122  | 1,438  | -6,344 | two-component response regulator                                            | regulatory functions                                                         |
| <i>alr7643</i> | 6,311  | 0,000  | -6,311 | unknown                                                                     | unknown                                                                      |
| <i>all0858</i> | 6,255  | 0,000  | -6,255 | unknown                                                                     | unknown                                                                      |
| <i>all0876</i> | 54,674 | 8,765  | -6,238 | unknown                                                                     | unknown                                                                      |
| <i>alr1565</i> | 6,235  | 0,000  | -6,235 | unknown                                                                     | unknown                                                                      |
| <i>asl2914</i> | 6,227  | 0,000  | -6,227 | similar to ferredoxin                                                       | electron transport chain                                                     |
| <i>asr4584</i> | 6,211  | 0,000  | -6,211 | unknown                                                                     | unknown                                                                      |
| <i>asr0516</i> | 6,145  | 0,000  | -6,145 | unknown                                                                     | unknown                                                                      |
| <i>all2103</i> | 62,508 | 10,225 | -6,113 | unknown                                                                     | unknown                                                                      |
| <i>asr1257</i> | 6,039  | 0,000  | -6,039 | unknown                                                                     | unknown                                                                      |
| <i>alr0698</i> | 6,028  | 1,000  | -6,027 | hydrogenase expression/formation protein HupE                               | other enzymes                                                                |
| <i>all3840</i> | 75,629 | 12,549 | -6,027 | NADH dehydrogenase chain J                                                  | respiration, oxidative phosphorylation                                       |
| <i>asl2332</i> | 5,988  | 0,000  | -5,988 | unknown                                                                     | unknown                                                                      |

|                |        |        |        |                                                                                      |                                         |
|----------------|--------|--------|--------|--------------------------------------------------------------------------------------|-----------------------------------------|
| <i>all0274</i> | 6,636  | 1,113  | -5,963 | Na-Ca exchanger/integrin-beta4                                                       | transport across membrane               |
| <i>alr1286</i> | 5,923  | 0,000  | -5,923 | ExsB family protein                                                                  | unknown                                 |
| <i>all1319</i> | 20,433 | 3,451  | -5,921 | 2-dehydropantoate 2-reductase                                                        | coenzymes and cofactors                 |
|                |        |        |        | two-component transcription regulator,<br>complementary chromatic adaptation protein |                                         |
| <i>all5323</i> | 5,351  | 0,904  | -5,921 | RcaC homolog                                                                         | regulatory functions                    |
| <i>asr3266</i> | 5,912  | 0,000  | -5,912 | unknown                                                                              | unknown                                 |
| <i>asl0884</i> | 5,897  | 0,000  | -5,897 | probable ferredoxin [2Fe-2S]                                                         | electron transport chain                |
| <i>rrn5Sa</i>  | 5,887  | 0,000  | -5,887 | 5S rRNA                                                                              | ribosome component                      |
|                |        |        |        | O-6-alkylguanine-DNA/cysteine-protein<br>methyltransferase                           | DNA degradation and modification        |
| <i>alr4990</i> | 5,871  | 0,000  | -5,871 | unknown                                                                              | unknown                                 |
| <i>alr2117</i> | 7,153  | 1,219  | -5,868 | unknown                                                                              | unknown                                 |
| <i>all0271</i> | 81,417 | 13,929 | -5,845 | unknown                                                                              | unknown                                 |
| <i>alr0590</i> | 5,780  | 0,000  | -5,780 | transposase                                                                          | transposon-related functions            |
| <i>asl3595</i> | 5,742  | 0,000  | -5,742 | unknown                                                                              | unknown                                 |
| <i>all4087</i> | 8,543  | 1,496  | -5,709 | protein kinase C inhibitor                                                           | cell division                           |
| <i>alr2169</i> | 6,527  | 1,143  | -5,709 | similar to D,D-carboxypeptidase                                                      | cell envelope                           |
| <i>alr1171</i> | 2,340  | 0,410  | -5,709 | two-component sensor histidine kinase                                                | regulatory functions                    |
| <i>all3332</i> | 5,077  | 0,889  | -5,709 | pentapeptide repeat-containing protein                                               | unknown                                 |
| <i>alr3912</i> | 3,562  | 0,624  | -5,709 | aspartoacylase                                                                       | amino acids biosynthesis and metabolism |
| <i>all3031</i> | 1,751  | 0,307  | -5,709 | OmpA/MotB                                                                            | cell envelope                           |
| <i>all1466</i> | 2,335  | 0,409  | -5,709 | kinesin light chain                                                                  | cell shape, microtubule motor activity  |
| <i>all0968</i> | 3,574  | 0,626  | -5,709 | 3-ketoacyl-acyl carrier protein reductase; FabG                                      | lipid metabolism                        |
| <i>alr3714</i> | 7,755  | 1,358  | -5,709 | HAD-superfamily hydrolase subfamily IIB                                              | other enzymes                           |
| <i>all2094</i> | 1,837  | 0,322  | -5,709 | two-component hybrid sensor and regulator                                            | regulatory functions                    |
| <i>all4924</i> | 1,223  | 0,214  | -5,709 | ferrichrome iron receptor                                                            | transport across membrane               |
| <i>all7106</i> | 31,436 | 5,506  | -5,709 | transposase                                                                          | transposon-related functions            |
| <i>all3013</i> | 12,712 | 2,226  | -5,709 | unknown                                                                              | unknown                                 |
| <i>all4265</i> | 4,691  | 0,822  | -5,709 | unknown                                                                              | unknown                                 |
| <i>all5060</i> | 5,502  | 0,964  | -5,709 | unknown                                                                              | unknown                                 |
| <i>alr2131</i> | 4,316  | 0,756  | -5,709 | unknown                                                                              | unknown                                 |
| <i>alr7126</i> | 1,612  | 0,282  | -5,709 | unknown                                                                              | unknown                                 |
| <i>asl2850</i> | 39,906 | 6,990  | -5,709 | unknown                                                                              | unknown                                 |
| <i>alr0728</i> | 4,650  | 0,814  | -5,709 | HAD family hydrolase                                                                 | other enzymes                           |
| <i>alr3269</i> | 4,472  | 0,783  | -5,709 | FHA domain containing protein                                                        | regulatory functions                    |
| <i>all3793</i> | 4,472  | 0,783  | -5,709 | allergen V5/Tpx-1 family protein                                                     | unknown                                 |
| <i>all7379</i> | 4,957  | 0,868  | -5,709 | unknown                                                                              | unknown                                 |
| <i>alr3491</i> | 3,028  | 0,530  | -5,709 | unknown                                                                              | unknown                                 |
| <i>asl1795</i> | 5,627  | 0,000  | -5,627 | unknown                                                                              | unknown                                 |
| <i>all0345</i> | 5,617  | 0,000  | -5,617 | transcriptional regulator                                                            | regulatory functions                    |
| <i>all0966</i> | 8,969  | 1,600  | -5,604 | unknown                                                                              | unknown                                 |
| <i>all1291</i> | 5,560  | 0,000  | -5,560 | cyanate lyase; CynS                                                                  | detoxification                          |

|                |         |        |        |                                             |                                           |
|----------------|---------|--------|--------|---------------------------------------------|-------------------------------------------|
| <i>asl7266</i> | 109,228 | 19,791 | -5,519 | unknown                                     | unknown                                   |
| <i>all2084</i> | 9,399   | 1,710  | -5,498 | unknown                                     | unknown                                   |
| <i>alr3610</i> | 5,473   | 0,000  | -5,473 | transposase                                 | transposon-related functions              |
| <i>alr1370</i> | 4,362   | 0,809  | -5,392 | unknown                                     | unknown                                   |
| <i>all0743</i> | 3,629   | 0,673  | -5,392 | adenylate cyclase; CyaD                     | regulatory functions                      |
| <i>alr3511</i> | 6,403   | 1,187  | -5,392 | two-component sensor histidine kinase       | regulatory functions                      |
| <i>all1841</i> | 5,389   | 0,000  | -5,389 | unknown                                     | unknown                                   |
| <i>alr4322</i> | 5,326   | 0,000  | -5,326 | malate dehydrogenase                        | TCA cycle                                 |
| <i>asr0847</i> | 5,307   | 0,000  | -5,307 | photosystem II protein PsbN                 | photosynthesis                            |
| <i>asl2786</i> | 5,307   | 0,000  | -5,307 | unknown                                     | unknown                                   |
| <i>all2545</i> | 10,811  | 2,045  | -5,286 | unknown                                     | unknown                                   |
| <i>alr1538</i> | 9,539   | 1,804  | -5,286 | unknown                                     | unknown                                   |
| <i>all1322</i> | 4,026   | 0,762  | -5,286 | TPR repeat-containing protein               | unknown                                   |
| <i>all7372</i> | 5,239   | 0,000  | -5,239 | unknown                                     | unknown                                   |
| <i>all2314</i> | 13,664  | 2,611  | -5,234 | unknown                                     | unknown                                   |
| <i>asr4522</i> | 5,228   | 0,000  | -5,228 | putative N-acetylmuramoyl-L-alanine amidase | peptidoglycan biosynthesis                |
| <i>all0659</i> | 5,206   | 0,000  | -5,206 | probable transcription regulator            | regulatory functions                      |
| <i>all5093</i> | 111,093 | 21,444 | -5,181 | unknown                                     | unknown                                   |
| <i>asr4048</i> | 5,151   | 0,000  | -5,151 | unknown                                     | unknown                                   |
| <i>alr4170</i> | 197,165 | 38,575 | -5,111 | unknown                                     | unknown                                   |
| <i>all4294</i> | 47,943  | 9,402  | -5,099 | probable N-acetylmuramoyl-L-alanine amidase | peptidoglycan biosynthesis                |
| <i>alr3362</i> | 5,077   | 0,000  | -5,077 | unknown                                     | unknown                                   |
| <i>asl3784</i> | 5,077   | 0,000  | -5,077 | unknown                                     | unknown                                   |
| <i>all2787</i> | 1,010   | 0,199  | -5,075 | probable kinesin light chain                | cell shape microtubule motor activity     |
| <i>alr0379</i> | 3,692   | 0,727  | -5,075 | cobalamin synthase                          | cobalamin, heme, phycobilin and porphyrin |
| <i>all3286</i> | 3,210   | 0,632  | -5,075 | N-acetylmuramoyl-L-alanine amidase          | peptidoglycan biosynthesis                |
| <i>all0450</i> | 5,766   | 1,136  | -5,075 | allophycocyanin alpha subunit ApcA          | phycobilisomes and phycobiliproteins      |
| <i>alr0904</i> | 2,080   | 0,410  | -5,075 | small GTP-binding protein domain            | regulatory functions                      |
|                |         |        |        | putative diguanylate cyclase with PAS/PAC   |                                           |
| <i>all4896</i> | 1,807   | 0,356  | -5,075 | sensor                                      | regulatory functions                      |
| <i>alr2190</i> | 11,368  | 2,240  | -5,075 | alpha-amylase                               | sugars                                    |
| <i>alr5237</i> | 2,235   | 0,440  | -5,075 | probable glycosyl transferase               | sugars                                    |
| <i>all1949</i> | 2,504   | 0,493  | -5,075 | ABC transporter, permease protein           | transport across membrane                 |
| <i>all1110</i> | 2,318   | 0,457  | -5,075 | chromate transport protein                  | transport across membrane                 |
| <i>all0321</i> | 3,221   | 0,635  | -5,075 | sulfate transport system permease protein   | transport across membrane                 |
| <i>all0282</i> | 5,731   | 1,129  | -5,075 | unknown                                     | unknown                                   |
| <i>all1465</i> | 1,411   | 0,278  | -5,075 | unknown                                     | unknown                                   |
| <i>all1958</i> | 2,566   | 0,506  | -5,075 | unknown                                     | unknown                                   |
| <i>all3404</i> | 7,984   | 1,573  | -5,075 | unknown                                     | unknown                                   |
| <i>all3515</i> | 3,063   | 0,603  | -5,075 | unknown                                     | unknown                                   |
| <i>all4425</i> | 2,755   | 0,543  | -5,075 | unknown                                     | unknown                                   |
| <i>all4626</i> | 9,248   | 1,822  | -5,075 | unknown                                     | unknown                                   |

|                |        |        |        |                                                                             |                                                                                                                          |
|----------------|--------|--------|--------|-----------------------------------------------------------------------------|--------------------------------------------------------------------------------------------------------------------------|
| <i>all5037</i> | 3,593  | 0,708  | -5,075 | unknown                                                                     | unknown                                                                                                                  |
| <i>all8022</i> | 8,982  | 1,770  | -5,075 | unknown                                                                     | unknown                                                                                                                  |
| <i>alr0196</i> | 2,104  | 0,415  | -5,075 | unknown                                                                     | unknown                                                                                                                  |
| <i>alr1036</i> | 2,947  | 0,581  | -5,075 | unknown                                                                     | unknown                                                                                                                  |
| <i>alr3950</i> | 20,605 | 4,060  | -5,075 | unknown                                                                     | unknown                                                                                                                  |
| <i>asr3498</i> | 13,737 | 2,707  | -5,075 | unknown                                                                     | unknown                                                                                                                  |
| <i>alr2782</i> | 18,934 | 3,731  | -5,075 | 3-dehydroquinate dehydratase                                                | amino acids biosynthesis and metabolism                                                                                  |
| <i>all0086</i> | 6,818  | 1,343  | -5,075 | rod shape-determining protein MreC                                          | cell shape                                                                                                               |
| <i>all2847</i> | 2,518  | 0,496  | -5,075 | cobalamin biosynthesis protein D                                            | cobalamin, heme, phycobilin and porphyrin                                                                                |
| <i>alr1264</i> | 1,753  | 0,345  | -5,075 | DnaK-type molecular chaperone DnaK                                          | heat shock proteins and chaperones                                                                                       |
| <i>alr3789</i> | 1,218  | 0,240  | -5,075 | predicted signal transduction protein containing Nacht domain               | regulatory functions                                                                                                     |
| <i>alr0582</i> | 2,341  | 0,461  | -5,075 | glycosyl transferase                                                        | sugars                                                                                                                   |
| <i>all5163</i> | 9,467  | 1,865  | -5,075 | peptidoglycan-binding LysM                                                  | surface components                                                                                                       |
| <i>all2236</i> | 1,087  | 0,214  | -5,075 | ferrichrome-iron receptor                                                   | transport across membrane                                                                                                |
| <i>all2067</i> | 4,916  | 0,969  | -5,075 | transposase                                                                 | transposon-related functions                                                                                             |
| <i>alr5340</i> | 2,284  | 0,450  | -5,075 | TPR repeat-containing protein                                               | unknown                                                                                                                  |
| <i>all1317</i> | 6,311  | 1,244  | -5,075 | unknown                                                                     | unknown                                                                                                                  |
| <i>all3208</i> | 2,365  | 0,466  | -5,075 | unknown                                                                     | unknown                                                                                                                  |
| <i>alr0162</i> | 6,997  | 1,379  | -5,075 | unknown                                                                     | unknown                                                                                                                  |
| <i>alr4742</i> | 1,766  | 0,348  | -5,075 | unknown                                                                     | unknown                                                                                                                  |
| <i>asr0243</i> | 9,532  | 1,878  | -5,075 | unknown                                                                     | unknown                                                                                                                  |
| <i>alr0348</i> | 61,522 | 12,293 | -5,004 | NADH dehydrogenase subunit 4; NdhD                                          | respiration, oxidative phosphorylation<br>pyruvate metabolism and reductive carboxylate cycle (CO <sub>2</sub> fixation) |
| <i>alr3397</i> | 9,479  | 1,897  | -4,996 | phosphoenolpyruvate synthase                                                | cycle (CO <sub>2</sub> fixation)                                                                                         |
| <i>asr3249</i> | 4,969  | 0,000  | -4,969 | putative ammonia monooxygenase                                              | nitrogen metabolism                                                                                                      |
| <i>all4935</i> | 6,879  | 1,390  | -4,948 | unknown                                                                     | unknown                                                                                                                  |
| <i>alr9017</i> | 25,071 | 5,081  | -4,934 | unknown                                                                     | unknown                                                                                                                  |
| <i>alr3506</i> | 11,069 | 2,251  | -4,916 | phosphoribose diphosphate:decaprenyl-phosphate<br>phosphoribosyltransferase | coenzymes and cofactors                                                                                                  |
| <i>all8023</i> | 3,580  | 0,728  | -4,916 | pentapeptide repeat-containing protein                                      | unknown                                                                                                                  |
| <i>alr4686</i> | 59,252 | 12,166 | -4,870 | cytochrome P450, germacrene A hydroxylase                                   | sesquiterpene biosynthesis                                                                                               |
| <i>all3744</i> | 4,745  | 0,976  | -4,864 | probable phytoene dehydrogenase                                             | carotenoids                                                                                                              |
| <i>alr0189</i> | 4,901  | 1,008  | -4,864 | ABC-1 domain protein                                                        | protein amino acid phosphorylation                                                                                       |
| <i>all2152</i> | 28,773 | 5,916  | -4,864 | transposase                                                                 | transposon-related functions                                                                                             |
| <i>all7313</i> | 7,795  | 1,603  | -4,864 | unknown                                                                     | unknown                                                                                                                  |
| <i>all4125</i> | 5,204  | 1,070  | -4,864 | unknown                                                                     | unknown                                                                                                                  |
| <i>all3893</i> | 4,831  | 0,000  | -4,831 | unknown                                                                     | unknown                                                                                                                  |
| <i>all4260</i> | 30,390 | 6,303  | -4,821 | unknown                                                                     | unknown                                                                                                                  |
| <i>alr3982</i> | 13,601 | 2,832  | -4,803 | two-component sensor histidine kinase                                       | regulatory functions                                                                                                     |
| <i>all5044</i> | 16,200 | 3,373  | -4,803 | polyamine ABC transporter, ATP-binding protein                              | transport across membrane                                                                                                |
| <i>asr2387</i> | 75,467 | 15,712 | -4,803 | unknown                                                                     | unknown                                                                                                                  |

|                |          |         |        |                                                 |                                                                                 |
|----------------|----------|---------|--------|-------------------------------------------------|---------------------------------------------------------------------------------|
| <i>all4473</i> | 4,790    | 0,000   | -4,790 | unknown                                         | unknown                                                                         |
| <i>alr4405</i> | 58,680   | 12,270  | -4,782 | unknown                                         | unknown                                                                         |
| <i>all0283</i> | 7,548    | 1,579   | -4,779 | WD-40 repeat protein                            | regulatory functions<br>degradation of proteins, peptides, and<br>glycopeptides |
| <i>all1090</i> | 10,969   | 2,306   | -4,758 | peptidase U62, modulator of DNA gyrase          | glycopeptides                                                                   |
| <i>all2761</i> | 5,724    | 1,203   | -4,758 | alpha/beta hydrolase fold protein               | other enzymes                                                                   |
| <i>alr2130</i> | 14,239   | 2,993   | -4,758 | unknown                                         | unknown                                                                         |
| <i>alr9015</i> | 5,166    | 1,086   | -4,758 | unknown                                         | unknown                                                                         |
| <i>all3922</i> | 5,490    | 1,154   | -4,758 | L-asparaginase                                  | amino acids biosynthesis and metabolism                                         |
| <i>alr0522</i> | 11,191   | 2,352   | -4,758 | probable pseudouridine synthase                 | posttranscriptional modifications                                               |
| <i>all0778</i> | 4,670    | 0,982   | -4,758 | similar to serine protease inhibitor            | protease inhibitor                                                              |
| <i>all5009</i> | 6,560    | 1,379   | -4,758 | aspartyl/asparaginyl beta-hydroxylase           | unknown                                                                         |
| <i>all1672</i> | 11,676   | 2,454   | -4,758 | unknown                                         | unknown                                                                         |
| <i>all1865</i> | 4,346    | 0,913   | -4,758 | similar to xenobiotic reductase                 | energy production and conversion                                                |
| <i>all2070</i> | 5,799    | 1,219   | -4,758 | ribonuclease BN                                 | RNA degradation                                                                 |
| <i>alr2324</i> | 63,661   | 13,411  | -4,747 | unknown                                         | unknown                                                                         |
| <i>all2568</i> | 4,746    | 0,000   | -4,746 | 2-phosphosulfolactate phosphatase               | coenzymes and cofactors                                                         |
| <i>all1082</i> | 4,746    | 0,000   | -4,746 | photosystem II protein PsbW, class I            | photosynthesis                                                                  |
| <i>all0688</i> | 4,729    | 0,000   | -4,729 | [NiFe] uptake hydrogenase small subunit (hupS)  | photosynthesis                                                                  |
| <i>alr1385</i> | 4,727    | 0,000   | -4,727 | unknown                                         | unknown                                                                         |
| <i>alr0971</i> | 30,468   | 6,447   | -4,726 | unknown                                         | unknown                                                                         |
| <i>all0703</i> | 4,708    | 0,000   | -4,708 | unknown                                         | unknown                                                                         |
| <i>alr7333</i> | 24,546   | 5,229   | -4,694 | putative nuclease                               | DNA degradation and modification                                                |
| <i>alr2386</i> | 1461,582 | 311,984 | -4,685 | TPR repeat-containing protein                   | unknown                                                                         |
| <i>all4523</i> | 68,207   | 14,579  | -4,679 | unknown                                         | unknown                                                                         |
| <i>all1365</i> | 4,670    | 0,000   | -4,670 | cytochrome CytM                                 | photosynthesis                                                                  |
| <i>alr2856</i> | 3,485    | 0,749   | -4,652 | lipopolysaccharide biosynthesis protein         | LPS biosynthesis                                                                |
| <i>all3367</i> | 65,231   | 14,086  | -4,631 | TPR repeat-containing protein                   | unknown                                                                         |
| <i>all5100</i> | 3,123    | 0,676   | -4,622 | alpha-2-macroglobulin domain-containing protein | unknown                                                                         |
| <i>all3894</i> | 70,891   | 15,338  | -4,622 | unknown                                         | unknown                                                                         |
| <i>alr3060</i> | 7,204    | 1,566   | -4,599 | O-antigen polymerase                            | cell wall/membrane biogenesis                                                   |
|                |          |         |        | cytochrome b6/f-complex, apocytochrome subunit  |                                                                                 |
| <i>alr3422</i> | 63,094   | 13,719  | -4,599 | 4 PetD                                          | photosynthesis                                                                  |
| <i>alr5162</i> | 22,062   | 4,815   | -4,582 | unknown                                         | unknown                                                                         |
| <i>asl0146</i> | 45,198   | 9,896   | -4,567 | 50S ribosomal protein L27                       | ribosome component                                                              |
| <i>all1830</i> | 4,534    | 0,000   | -4,534 | unknown                                         | unknown                                                                         |
| <i>alr2394</i> | 21,784   | 4,807   | -4,531 | FraE                                            | filament integrity<br>degradation of proteins, peptides, and<br>glycopeptides   |
| <i>alr0702</i> | 61,910   | 13,697  | -4,520 | serine proteinase                               | glycopeptides                                                                   |
| <i>asl9502</i> | 327,314  | 72,416  | -4,520 | unknown                                         | unknown                                                                         |
| <i>alr4329</i> | 58,897   | 13,031  | -4,520 | anti-sigma-factor antagonist                    | regulatory functions                                                            |
| <i>alr2769</i> | 4,513    | 0,000   | -4,513 | transcriptional regulator                       | regulatory functions                                                            |



|                |        |       |        |                                                |                                                |
|----------------|--------|-------|--------|------------------------------------------------|------------------------------------------------|
| <i>asl3518</i> | 4,491  | 0,000 | -4,491 | putative ABC transporter, transmembrane region | transport across membrane                      |
| <i>alr4953</i> | 34,102 | 7,596 | -4,489 | unknown                                        | unknown                                        |
| <i>all1673</i> | 1,746  | 0,393 | -4,441 | similar to heme binding protein Cema           | cell envelope                                  |
| <i>alr5314</i> | 1,100  | 0,248 | -4,441 | photosystem I P700 chlorophyll a apoprotein A2 | photosynthesis                                 |
| <i>alr2204</i> | 4,969  | 1,119 | -4,441 | thioredoxin reductase                          | redox homeostasis                              |
| <i>alr4079</i> | 4,894  | 1,102 | -4,441 | 4-hydroxybenzoyl-CoA thioesterase              | resistance, adaptations to atypical conditions |
| <i>alr3062</i> | 5,077  | 1,143 | -4,441 | probable glycosyl transferase                  | sugars                                         |
| <i>all0042</i> | 23,278 | 5,242 | -4,441 | putative glycosyl transferase                  | sugars                                         |
| <i>alr4509</i> | 7,006  | 1,578 | -4,441 | polysaccharide pyruvyl transferase             | surface components                             |
| <i>alr2879</i> | 1,224  | 0,276 | -4,441 | bicarbonate transport ATP-binding protein CmpC | transport across membrane                      |
| <i>all2399</i> | 9,692  | 2,182 | -4,441 | unknown                                        | unknown                                        |
| <i>alr3008</i> | 6,755  | 1,521 | -4,441 | unknown                                        | unknown                                        |
| <i>all4970</i> | 2,339  | 0,527 | -4,441 | hydantoinase/oxoprolinase                      | amino acids biosynthesis and metabolism        |
| <i>alr1039</i> | 4,097  | 0,923 | -4,441 | probable aspartate aminotransferase            | amino acids biosynthesis and metabolism        |
|                |        |       |        |                                                | aminoacyl tRNA synthetases and tRNA            |
| <i>alr1885</i> | 2,404  | 0,541 | -4,441 | queuine tRNA-ribosyltransferase                | modification                                   |
| <i>asl4136</i> | 10,754 | 2,422 | -4,441 | prevent-host-death protein                     | cell division                                  |
| <i>all3702</i> | 3,027  | 0,682 | -4,441 | similar to D,D-carboxypeptidase                | cell envelope                                  |
|                |        |       |        | curli production assembly/transport component  |                                                |
| <i>alr3345</i> | 4,794  | 1,080 | -4,441 | CsgG                                           | cell wall/membrane biogenesis                  |
| <i>all4135</i> | 6,336  | 1,427 | -4,441 | PilT protein-like                              | chemotaxis and cell motility                   |
| <i>all0067</i> | 4,566  | 1,028 | -4,441 | cobalamin adenosyltransferase                  | cobalamin, heme, phycobilin and porphyrin      |
|                |        |       |        |                                                | degradation of proteins, peptides, and         |
| <i>alr0996</i> | 1,671  | 0,376 | -4,441 | protease                                       | glycopeptides                                  |
| <i>all4941</i> | 33,225 | 7,482 | -4,441 | putative Orange carotenoid protein             | detoxification                                 |
| <i>alr4604</i> | 0,848  | 0,191 | -4,441 | type I site-specific deoxyribonuclease chain R | DNA degradation and modification               |
| <i>all1427</i> | 4,128  | 0,930 | -4,441 | CBS domain containing membrane protein         | membrane component                             |
|                |        |       |        |                                                | membrane fusions, proteolysis and DNA          |
| <i>all3141</i> | 5,461  | 1,230 | -4,441 | AAA superfamily ATPase                         | replication                                    |
| <i>all3113</i> | 3,802  | 0,856 | -4,441 | serine esterase                                | other enzymes                                  |
| <i>all0193</i> | 13,948 | 3,141 | -4,441 | haloalkane dehalogenase                        | other enzymes                                  |
| <i>all2470</i> | 3,784  | 0,852 | -4,441 | protein serine-threonine phosphatase           | regulatory functions                           |
| <i>alr4954</i> | 1,788  | 0,403 | -4,441 | serine/threonine kinase                        | regulatory functions                           |
| <i>alr0642</i> | 7,773  | 1,751 | -4,441 | two-component sensor histidine kinase          | regulatory functions                           |
| <i>all1495</i> | 12,574 | 2,832 | -4,441 | virulence associated protein C                 | resistance, adaptations to atypical conditions |
| <i>all2641</i> | 0,801  | 0,180 | -4,441 | polyketide synthase                            | siderophore/cyanotoxin biosynthesis            |
| <i>all4426</i> | 1,955  | 0,440 | -4,441 | probable glucosyltransferase                   | sugars                                         |
| <i>all5118</i> | 14,860 | 3,346 | -4,441 | probable glycosyl transferase                  | sugars                                         |
| <i>alr4492</i> | 2,383  | 0,537 | -4,441 | probable glycosyltransferase                   | sugars                                         |
| <i>all0916</i> | 7,656  | 1,724 | -4,441 | ABC transporter ATP binding subunit            | transport across membrane                      |
|                |        |       |        | branched-chain amino acid ABC transporter,     |                                                |
| <i>alr2539</i> | 3,144  | 0,708 | -4,441 | ATP-binding protein                            | transport across membrane                      |

|                |         |        |        |                                                                           |                                                              |
|----------------|---------|--------|--------|---------------------------------------------------------------------------|--------------------------------------------------------------|
| <i>alr2209</i> | 0,926   | 0,208  | -4,441 | ferric aerobactin receptor                                                | transport across membrane                                    |
| <i>alr1854</i> | 4,780   | 1,076  | -4,441 | transposase                                                               | transposon-related functions                                 |
| <i>alr3384</i> | 2,743   | 0,618  | -4,441 | transposase                                                               | transposon-related functions                                 |
| <i>alr1315</i> | 3,027   | 0,682  | -4,441 | type IV prepilin peptidase                                                | type-IV pilus biogenesis and extracellular protein secretion |
| <i>all0403</i> | 7,430   | 1,673  | -4,441 | unknown                                                                   | unknown                                                      |
| <i>all3852</i> | 2,898   | 0,653  | -4,441 | unknown                                                                   | unknown                                                      |
| <i>alr1851</i> | 3,434   | 0,773  | -4,441 | unknown                                                                   | unknown                                                      |
| <i>alr5197</i> | 2,008   | 0,452  | -4,441 | unknown                                                                   | unknown                                                      |
| <i>alr7074</i> | 6,336   | 1,427  | -4,441 | unknown                                                                   | unknown                                                      |
| <i>alr7503</i> | 6,436   | 1,449  | -4,441 | unknown                                                                   | unknown                                                      |
| <i>alr7517</i> | 4,066   | 0,916  | -4,441 | unknown                                                                   | unknown                                                      |
| <i>alr7613</i> | 3,050   | 0,687  | -4,441 | unknown                                                                   | unknown                                                      |
| <i>alr8529</i> | 4,235   | 0,954  | -4,441 | unknown                                                                   | unknown                                                      |
| <i>asr1558</i> | 11,845  | 2,667  | -4,441 | unknown                                                                   | unknown                                                      |
| <i>asr4560</i> | 11,196  | 2,521  | -4,441 | unknown                                                                   | unknown                                                      |
| <i>all0771</i> | 2,369   | 0,533  | -4,441 | 4-hydroxyphenylpyruvate dioxygenase                                       | amino acids biosynthesis and metabolism                      |
| <i>asl2686</i> | 4,434   | 0,000  | -4,434 | unknown                                                                   | unknown                                                      |
| <i>asl4266</i> | 4,434   | 0,000  | -4,434 | unknown                                                                   | unknown                                                      |
| <i>alr2478</i> | 4,423   | 0,000  | -4,423 | unknown                                                                   | unknown                                                      |
| <i>all1991</i> | 4,414   | 0,000  | -4,414 | unknown                                                                   | unknown                                                      |
| <i>all1691</i> | 138,270 | 31,483 | -4,392 | ferric uptake regulator FurA                                              | regulatory functions                                         |
| <i>all1065</i> | 24,511  | 5,620  | -4,361 | unknown                                                                   | unknown                                                      |
| <i>all4875</i> | 36,554  | 8,392  | -4,356 | unknown                                                                   | unknown                                                      |
| <i>alr0543</i> | 57,058  | 13,104 | -4,354 | ABC transporter; substrate-binding protein                                | transport across membrane                                    |
| <i>all1701</i> | 14,371  | 3,304  | -4,350 | unknown                                                                   | unknown                                                      |
| <i>alr7092</i> | 4,324   | 0,000  | -4,324 | unknown                                                                   | unknown                                                      |
| <i>all3841</i> | 223,080 | 51,626 | -4,321 | NADH dehydrogenase chain K                                                | respiration, oxidative phosphorylation                       |
| <i>alr4863</i> | 16,697  | 3,865  | -4,320 | unknown                                                                   | unknown                                                      |
| <i>all1027</i> | 4,314   | 0,000  | -4,314 | ABC transporter, periplasmic sugar-binding protein                        | transport across membrane                                    |
| <i>alr2581</i> | 4,506   | 1,045  | -4,314 | similar to ferric aerobactin receptor                                     | transport across membrane                                    |
| <i>alr0236</i> | 4,300   | 0,000  | -4,300 | unknown                                                                   | unknown                                                      |
| <i>all4887</i> | 6,447   | 1,506  | -4,282 | lysine decarboxylase                                                      | amino acids biosynthesis and metabolism                      |
| <i>all3722</i> | 54,623  | 12,756 | -4,282 | precorrin-6 $\gamma$ -dependent methyltransferase                         | cobalamin, heme, phycobilin and porphyrin                    |
| <i>all4760</i> | 9,821   | 2,294  | -4,282 | unknown                                                                   | unknown                                                      |
| <i>alr5226</i> | 35,635  | 8,366  | -4,259 | unknown                                                                   | unknown                                                      |
| <i>alr4153</i> | 4,246   | 0,000  | -4,246 | sporulation-control protein Spo0M homolog                                 | resistance, adaptations to atypical conditions               |
| <i>alr3150</i> | 51,308  | 12,094 | -4,242 | glycosyl transferase                                                      | sugars                                                       |
| <i>all0405</i> | 3,370   | 0,797  | -4,229 | unknown                                                                   | unknown                                                      |
| <i>alr4280</i> | 14,161  | 3,369  | -4,203 | heterocyst specific ABC-transporter, membrane fusion protein DevB homolog | transport across membrane, heterocyst                        |

|                |         |        |        |                                                                           |                                                |
|----------------|---------|--------|--------|---------------------------------------------------------------------------|------------------------------------------------|
| <i>all7112</i> | 26,446  | 6,293  | -4,203 | transposase                                                               | transposon-related functions                   |
| <i>alr4685</i> | 43,017  | 10,257 | -4,194 | terpene synthase, metal-binding                                           | terpene biosynthesis                           |
| <i>all5221</i> | 14,324  | 3,421  | -4,187 | unknown                                                                   | unknown                                        |
| <i>alr7009</i> | 4,170   | 0,000  | -4,170 | transposase                                                               | transposon-related functions                   |
| <i>alr2943</i> | 4,170   | 0,000  | -4,170 | unknown                                                                   | unknown                                        |
| <i>alr3968</i> | 209,108 | 50,197 | -4,166 | unknown                                                                   | unknown                                        |
| <i>alr1659</i> | 4,162   | 0,000  | -4,162 | surface antigen                                                           | surface components                             |
| <i>asr0925</i> | 71,759  | 17,255 | -4,159 | unknown                                                                   | unknown                                        |
| <i>all2531</i> | 4,145   | 0,000  | -4,145 | nitrogen fixation protein NifX homolog                                    | nitrogen fixation                              |
| <i>all3735</i> | 31,697  | 7,648  | -4,145 | fructose-bisphosphate aldolase class I                                    | glycolysis                                     |
| <i>all0830</i> | 43,934  | 10,607 | -4,142 | ABC transporter permease protein                                          | transport across membrane                      |
| <i>asr3427</i> | 22,998  | 5,577  | -4,123 | 50S ribosomal protein L35                                                 | ribosome component                             |
| <i>alr0227</i> | 4,944   | 1,199  | -4,123 | inorganic polyphosphate/ATP-NAD kinase                                    | sugars                                         |
| <i>all0363</i> | 25,298  | 6,135  | -4,123 | transposase                                                               | transposon-related functions                   |
| <i>alr0739</i> | 23,473  | 5,692  | -4,123 | unknown                                                                   | unknown                                        |
| <i>alr0805</i> | 41,873  | 10,155 | -4,123 | unknown                                                                   | unknown                                        |
| <i>alr0644</i> | 6,963   | 1,689  | -4,123 | biopolymer transport protein ExbD/TolR                                    | intracellular trafficking and secretion        |
| <i>alr1170</i> | 38,755  | 9,399  | -4,123 | two-component response regulator                                          | regulatory functions                           |
| <i>all7161</i> | 3,729   | 0,904  | -4,123 | transposase                                                               | transposon-related functions                   |
| <i>all4333</i> | 7,744   | 1,878  | -4,123 | unknown                                                                   | unknown                                        |
| <i>asl3597</i> | 87,235  | 21,156 | -4,123 | unknown                                                                   | unknown                                        |
| <i>asl3966</i> | 4,121   | 0,000  | -4,121 | unknown                                                                   | unknown                                        |
| <i>alr2486</i> | 60,126  | 14,676 | -4,097 | ABC transporter ATP-binding protein                                       | transport across membrane                      |
| <i>asl2354</i> | 4,097   | 0,000  | -4,097 | CAB/ELIP/HLIP-related protein                                             | resistance, adaptations to atypical conditions |
| <i>all4236</i> | 4,097   | 0,000  | -4,097 | unknown                                                                   | unknown                                        |
| <i>alr2246</i> | 4,097   | 0,000  | -4,097 | unknown                                                                   | unknown                                        |
| <i>all7172</i> | 9,951   | 2,440  | -4,078 | putative helicase                                                         | DNA replication, recombination and repair      |
| <i>all3021</i> | 4,050   | 0,000  | -4,050 | unknown                                                                   | unknown                                        |
| <i>alr7261</i> | 4,040   | 0,000  | -4,040 | sugar-non-specific nuclease NucA homolog                                  | DNA degradation and modification               |
| <i>all7110</i> | 44,246  | 10,979 | -4,030 | unknown                                                                   | unknown                                        |
| <i>alr4077</i> | 109,654 | 27,208 | -4,030 | unknown                                                                   | unknown                                        |
| <i>alr3337</i> | 4,026   | 0,000  | -4,026 | unknown                                                                   | unknown                                        |
| <i>alr3088</i> | 5,718   | 1,423  | -4,018 | class-V aminotransferase; NifS                                            | nitrogen metabolism                            |
| <i>alr3385</i> | 11,204  | 2,789  | -4,018 | GAF domain containing protein                                             | secondary metabolites biosynthesis             |
| <i>asl4098</i> | 34,130  | 8,495  | -4,018 | unknown                                                                   | unknown                                        |
| <i>all2390</i> | 14,452  | 3,597  | -4,018 | cell division inhibitor                                                   | cell division                                  |
| <i>all2358</i> | 6,784   | 1,689  | -4,018 | phosphonate ABC transport phosphonate binding component                   | transport across membrane                      |
| <i>alr3647</i> | 5,100   | 1,269  | -4,018 | heterocyst specific ABC-transporter, membrane fusion protein DevB homolog | transport across membrane, heterocyst          |
| <i>all1764</i> | 10,223  | 2,545  | -4,018 | unknown                                                                   | unknown                                        |
| <i>all4763</i> | 10,666  | 2,655  | -4,018 | unknown                                                                   | unknown                                        |

|                |         |         |        |                                                                                            |                                                                          |
|----------------|---------|---------|--------|--------------------------------------------------------------------------------------------|--------------------------------------------------------------------------|
| <i>asl3517</i> | 418,394 | 104,299 | -4,011 | unknown                                                                                    | unknown                                                                  |
| <i>all1889</i> | 30,650  | 7,669   | -3,997 | unknown                                                                                    | unknown                                                                  |
| <i>alr4628</i> | 59,608  | 14,924  | -3,994 | transposase                                                                                | transposon-related functions                                             |
| <i>alr1856</i> | 90,131  | 22,604  | -3,987 | unknown                                                                                    | unknown                                                                  |
| <i>alr3671</i> | 12,592  | 3,158   | -3,987 | two-component hybrid sensor and regulator<br>fdxN element excision controlling factor XisH | regulatory functions                                                     |
| <i>alr0083</i> | 191,217 | 48,015  | -3,982 | homolog                                                                                    | heterocyst differentiation                                               |
| <i>all2692</i> | 3,971   | 0,000   | -3,971 | transposase                                                                                | transposon-related functions                                             |
| <i>asr9503</i> | 42,305  | 10,670  | -3,965 | unknown                                                                                    | unknown                                                                  |
| <i>asl5085</i> | 134,208 | 33,850  | -3,965 | unknown                                                                                    | unknown                                                                  |
| <i>asr0843</i> | 3,958   | 0,000   | -3,958 | 30S ribosomal protein S21                                                                  | ribosome component                                                       |
| <i>alr4823</i> | 3,958   | 0,000   | -3,958 | similar to glucosyl-1-phosphate transferase                                                | sugars                                                                   |
| <i>asl1676</i> | 3,958   | 0,000   | -3,958 | unknown                                                                                    | unknown                                                                  |
| <i>asr0100</i> | 3,958   | 0,000   | -3,958 | unknown                                                                                    | unknown                                                                  |
| <i>alr0246</i> | 3,948   | 0,000   | -3,948 | heat shock protein DnaJ-like                                                               | heat shock proteins and chaperones                                       |
| <i>all4883</i> | 96,143  | 24,376  | -3,944 | NADH dehydrogenase subunit 2                                                               | respiration, oxidative phosphorylation                                   |
| <i>asr0756</i> | 3,936   | 0,000   | -3,936 | unknown                                                                                    | unknown                                                                  |
| <i>alr4891</i> | 34,011  | 8,654   | -3,930 | probable chloride channel protein                                                          | transport across membrane                                                |
| <i>alr4310</i> | 175,457 | 44,771  | -3,919 | unknown                                                                                    | unknown                                                                  |
| <i>all3899</i> | 3,918   | 0,000   | -3,918 | mutator protein MutT                                                                       | DNA replication, recombination and repair                                |
| <i>asl1749</i> | 142,423 | 36,407  | -3,912 | unknown                                                                                    | unknown                                                                  |
| <i>all4799</i> | 116,205 | 29,800  | -3,900 | DedA protein                                                                               | membrane component                                                       |
| <i>asr4959</i> | 3,892   | 0,000   | -3,892 | YciI-like protein                                                                          | unknown                                                                  |
| <i>alr3608</i> | 61,864  | 15,976  | -3,872 | similar to endoglucanase                                                                   | sugars                                                                   |
| <i>alr1300</i> | 3,866   | 0,000   | -3,866 | unknown                                                                                    | unknown                                                                  |
| <i>alr1794</i> | 58,783  | 15,232  | -3,859 | unknown                                                                                    | unknown                                                                  |
| <i>all0878</i> | 3,849   | 0,000   | -3,849 | probable acetyltransferase                                                                 | other enzymes                                                            |
| <i>asl3128</i> | 3,849   | 0,000   | -3,849 | unknown                                                                                    | unknown                                                                  |
| <i>asr1714</i> | 3,849   | 0,000   | -3,849 | unknown                                                                                    | unknown                                                                  |
| <i>asl0206</i> | 3,828   | 0,000   | -3,828 | unknown                                                                                    | unknown                                                                  |
| <i>asr3369</i> | 3,828   | 0,000   | -3,828 | unknown                                                                                    | unknown                                                                  |
| <i>asl4253</i> | 3,807   | 0,000   | -3,807 | unknown                                                                                    | unknown                                                                  |
| <i>all4477</i> | 0,983   | 0,258   | -3,806 | DnaK-type molecular chaperone DnaK                                                         | heat shock proteins and chaperones                                       |
| <i>alr1809</i> | 8,982   | 2,360   | -3,806 | heat shock protein, class I                                                                | heat shock proteins and chaperones                                       |
| <i>all4574</i> | 4,420   | 1,161   | -3,806 | phosphate ABC transporter, permease protein                                                | transport across membrane                                                |
| <i>all3781</i> | 4,579   | 1,203   | -3,806 | unknown                                                                                    | unknown                                                                  |
| <i>alr3182</i> | 2,848   | 0,748   | -3,806 | glucose inhibited division protein B                                                       | cell division<br>degradation of proteins, peptides, and<br>glycopeptides |
| <i>alr3931</i> | 9,383   | 2,465   | -3,806 | rhomboid-like protein                                                                      | glycopeptides                                                            |
| <i>asr4549</i> | 7,453   | 1,958   | -3,806 | pterin-4a-carbinolamine dehydratase                                                        | other enzymes                                                            |
| <i>alr3095</i> | 6,507   | 1,710   | -3,806 | putative methyltransferase                                                                 | other enzymes                                                            |
| <i>all2760</i> | 2,091   | 0,549   | -3,806 | serine/threonine kinase                                                                    | regulatory functions                                                     |

|                |        |       |        |                                                                                           |                                                |
|----------------|--------|-------|--------|-------------------------------------------------------------------------------------------|------------------------------------------------|
| <i>all2699</i> | 1,521  | 0,400 | -3,806 | two-component sensor histidine kinase similar to penicillin-resistant DD-carboxypeptidase | regulatory functions                           |
| <i>alr1540</i> | 38,015 | 9,988 | -3,806 |                                                                                           | resistance, adaptations to atypical conditions |
| <i>alr3380</i> | 2,073  | 0,545 | -3,806 | dolichol-phosphate mannosyltransferase                                                    | surface components                             |
| <i>all5110</i> | 0,880  | 0,231 | -3,806 | putative filamentous hemagglutinin family outer membrane protein                          | surface components                             |
| <i>alr2880</i> | 2,416  | 0,635 | -3,806 | bicarbonate transport ATP-binding protein CmpD                                            | transport across membrane                      |
| <i>alr3946</i> | 2,548  | 0,669 | -3,806 | cobalt transport ATP-binding protein CbiO                                                 | transport across membrane                      |
| <i>all0388</i> | 2,327  | 0,611 | -3,806 | iron(III) ABC transporter, periplasmic iron-compound-binding protein                      | transport across membrane                      |
| <i>all4614</i> | 4,980  | 1,308 | -3,806 | multidrug efflux transporter, MFS family protein                                          | transport across membrane                      |
| <i>all3567</i> | 1,027  | 0,270 | -3,806 | probable Na <sup>+</sup> /H <sup>+</sup> -exchanging protein                              | transport across membrane                      |
| <i>alr1398</i> | 0,829  | 0,218 | -3,806 | TPR repeat-containing protein                                                             | unknown                                        |
| <i>all0712</i> | 4,670  | 1,227 | -3,806 | unknown                                                                                   | unknown                                        |
| <i>all0753</i> | 5,307  | 1,394 | -3,806 | unknown                                                                                   | unknown                                        |
| <i>all0937</i> | 2,407  | 0,632 | -3,806 | unknown                                                                                   | unknown                                        |
| <i>all1509</i> | 2,104  | 0,553 | -3,806 | unknown                                                                                   | unknown                                        |
| <i>all4109</i> | 2,968  | 0,780 | -3,806 | unknown                                                                                   | unknown                                        |
| <i>alr0647</i> | 3,520  | 0,925 | -3,806 | unknown                                                                                   | unknown                                        |
| <i>alr0811</i> | 7,006  | 1,841 | -3,806 | unknown                                                                                   | unknown                                        |
| <i>alr2749</i> | 4,462  | 1,172 | -3,806 | unknown                                                                                   | unknown                                        |
| <i>alr3715</i> | 7,006  | 1,841 | -3,806 | unknown                                                                                   | unknown                                        |
| <i>alr4064</i> | 7,222  | 1,897 | -3,806 | unknown                                                                                   | unknown                                        |
| <i>alr4739</i> | 9,961  | 2,617 | -3,806 | unknown                                                                                   | unknown                                        |
| <i>alr4952</i> | 5,348  | 1,405 | -3,806 | unknown                                                                                   | unknown                                        |
| <i>alr5363</i> | 3,726  | 0,979 | -3,806 | unknown                                                                                   | unknown                                        |
| <i>asr0923</i> | 30,907 | 8,120 | -3,806 | unknown                                                                                   | unknown                                        |
| <i>asr4951</i> | 17,087 | 4,489 | -3,806 | unknown                                                                                   | unknown                                        |
| <i>all0170</i> | 1,914  | 0,503 | -3,806 | glycolate oxidase                                                                         | amino acids biosynthesis and metabolism        |
| <i>all4966</i> | 3,639  | 0,956 | -3,806 | histidinol-phosphate aminotransferase                                                     | amino acids biosynthesis and metabolism        |
| <i>all0574</i> | 5,575  | 1,465 | -3,806 | phospho-2-dehydro-3-deoxyheptonate aldolase; AroF                                         | amino acids biosynthesis and metabolism        |
| <i>all1638</i> | 4,220  | 1,109 | -3,806 | molybdopterin converting factor, subunit 2                                                | coenzymes and cofactors                        |
| <i>alr0312</i> | 1,191  | 0,313 | -3,806 | 2-succinyl-6-hydroxy-2,4-cyclohexadiene-1-carboxylate synthase; MenD                      | coenzymes and cofactors                        |
| <i>all0066</i> | 17,514 | 4,601 | -3,806 | dCTP deaminase                                                                            | dNTPs biosynthesis                             |
| <i>alr2405</i> | 8,194  | 2,153 | -3,806 | flavodoxin, IsiB                                                                          | electron transport chain                       |
| <i>all2102</i> | 4,755  | 1,249 | -3,806 | N-acyl-L-amino acid amidohydrolase                                                        | lipid metabolism                               |
| <i>all2319</i> | 6,200  | 1,629 | -3,806 | nitrogen regulatory protein P-II                                                          | nitrogen metabolism                            |
| <i>all5023</i> | 2,013  | 0,529 | -3,806 | probable hydrolase                                                                        | other enzymes                                  |
| <i>all4106</i> | 3,925  | 1,031 | -3,806 | probable oxidoreductase                                                                   | redox reactions                                |
| <i>alr2920</i> | 4,798  | 1,261 | -3,806 | putative short chain oxidoreductase                                                       | redox reactions                                |

|                |         |        |        |                                                                                        |                                           |
|----------------|---------|--------|--------|----------------------------------------------------------------------------------------|-------------------------------------------|
| <i>all4518</i> | 1,345   | 0,353  | -3,806 | serine/threonine kinase<br>serine/threonine kinase with two-component<br>sensor domain | regulatory functions                      |
| <i>all1625</i> | 0,392   | 0,103  | -3,806 | resolvase, RNase H-like fold                                                           | regulatory functions                      |
| <i>alr4394</i> | 4,702   | 1,235  | -3,806 | ABC transporter, ATP-binding protein                                                   | RNA synthesis and modification            |
| <i>all0832</i> | 2,715   | 0,713  | -3,806 | ABC transporter, ferric iron-binding periplasmic<br>protein                            | transport across membrane                 |
| <i>alr1382</i> | 4,158   | 1,092  | -3,806 | ferrichrome-iron receptor                                                              | transport across membrane                 |
| <i>alr2588</i> | 0,822   | 0,216  | -3,806 | probable reverse transcriptase                                                         | transposon-related functions              |
| <i>all5206</i> | 1,297   | 0,341  | -3,806 | putative transposase                                                                   | transposon-related functions              |
| <i>asr7642</i> | 8,757   | 2,301  | -3,806 | transposase                                                                            | transposon-related functions              |
| <i>alr0019</i> | 5,650   | 1,484  | -3,806 | TPR repeat-containing protein                                                          | unknown                                   |
| <i>all3083</i> | 6,625   | 1,740  | -3,806 | unknown                                                                                | unknown                                   |
| <i>all0112</i> | 8,757   | 2,301  | -3,806 | unknown                                                                                | unknown                                   |
| <i>all0967</i> | 1,412   | 0,371  | -3,806 | unknown                                                                                | unknown                                   |
| <i>all1226</i> | 7,677   | 2,017  | -3,806 | unknown                                                                                | unknown                                   |
| <i>all4297</i> | 3,199   | 0,840  | -3,806 | unknown                                                                                | unknown                                   |
| <i>all4724</i> | 1,705   | 0,448  | -3,806 | unknown                                                                                | unknown                                   |
| <i>all5191</i> | 1,376   | 0,362  | -3,806 | unknown                                                                                | unknown                                   |
| <i>all9020</i> | 1,434   | 0,377  | -3,806 | unknown                                                                                | unknown                                   |
| <i>alr2202</i> | 4,003   | 1,052  | -3,806 | unknown                                                                                | unknown                                   |
| <i>alr3591</i> | 2,189   | 0,575  | -3,806 | unknown                                                                                | unknown                                   |
| <i>alr3990</i> | 5,650   | 1,484  | -3,806 | unknown                                                                                | unknown                                   |
| <i>alr2377</i> | 5,673   | 1,490  | -3,806 | cobyric acid synthase                                                                  | cobalamin, heme, phycobilin and porphyrin |
| <i>all0759</i> | 3,160   | 0,830  | -3,806 | WD-repeat containing protein                                                           | regulatory functions                      |
| <i>alr3890</i> | 2,836   | 0,745  | -3,806 | unknown                                                                                | unknown                                   |
| <i>all5274</i> | 270,716 | 71,248 | -3,800 | unknown                                                                                | unknown                                   |
| <i>asl7034</i> | 3,766   | 0,000  | -3,766 | transcriptional regulator                                                              | regulatory functions                      |
| <i>alr7384</i> | 3,766   | 0,000  | -3,766 | unknown                                                                                | unknown                                   |
| <i>asr2348</i> | 3,766   | 0,000  | -3,766 | unknown                                                                                | unknown                                   |
| <i>all4796</i> | 53,802  | 14,436 | -3,727 | unknown                                                                                | unknown                                   |
| <i>asr1451</i> | 3,726   | 0,000  | -3,726 | unknown                                                                                | unknown                                   |
| <i>alr7083</i> | 110,187 | 29,607 | -3,722 | chromosome partitioning protein, ParB family                                           | nucleoproteins                            |
| <i>alr9016</i> | 33,015  | 8,886  | -3,716 | unknown                                                                                | unknown                                   |
| <i>alr3602</i> | 12,973  | 3,498  | -3,709 | probable long-chain-fatty-acid--CoA ligase                                             | lipid metabolism                          |
| <i>all2069</i> | 3,707   | 0,000  | -3,707 | unknown                                                                                | unknown                                   |
| <i>alr2203</i> | 3,700   | 0,000  | -3,700 | unknown                                                                                | unknown                                   |
| <i>alr0651</i> | 81,399  | 22,087 | -3,685 | unknown                                                                                | unknown                                   |
| <i>all4085</i> | 3,682   | 0,000  | -3,682 | endonuclease V                                                                         | DNA degradation and modification          |
| <i>all4828</i> | 138,494 | 37,618 | -3,682 | GDP-D-mannose dehydratase                                                              | sugars                                    |
| <i>alr3119</i> | 10,003  | 2,719  | -3,679 | WD repeat protein with Ser/Thr protein kinase<br>motif                                 | regulatory functions                      |
| <i>all1072</i> | 8,572   | 2,330  | -3,679 | two-component response regulator                                                       | regulatory functions                      |

|                |         |         |        |                                                                                  |                                                |
|----------------|---------|---------|--------|----------------------------------------------------------------------------------|------------------------------------------------|
| <i>all4855</i> | 3,678   | 0,000   | -3,678 | transcriptional regulator                                                        | regulatory functions                           |
| <i>asr2994</i> | 252,768 | 68,769  | -3,676 | unknown                                                                          | unknown                                        |
| <i>all4432</i> | 17,474  | 4,758   | -3,673 | probable exopolysaccharide biosynthesis protein                                  | exopolysaccharide biosynthesis                 |
| <i>alr0541</i> | 58,743  | 16,005  | -3,670 | GCN5-related N-acetyltransferase                                                 | other enzymes                                  |
| <i>alr2560</i> | 3,649   | 0,000   | -3,649 | unknown                                                                          | unknown                                        |
| <i>alr5051</i> | 3,649   | 0,000   | -3,649 | unknown                                                                          | unknown                                        |
| <i>asr3109</i> | 3,649   | 0,000   | -3,649 | unknown                                                                          | unknown                                        |
| <i>asr4457</i> | 3,649   | 0,000   | -3,649 | unknown                                                                          | unknown                                        |
| <i>all7362</i> | 19,531  | 5,354   | -3,648 | sugar-non-specific nuclease NucA<br>putative twin-arginine translocation pathway | DNA degradation and modification               |
| <i>alr4794</i> | 3,684   | 1,010   | -3,648 | signal                                                                           | transport across membrane                      |
| <i>all1781</i> | 20,500  | 5,620   | -3,648 | unknown                                                                          | unknown                                        |
| <i>all2200</i> | 14,361  | 3,937   | -3,648 | unknown                                                                          | unknown                                        |
| <i>alr1537</i> | 6,731   | 1,845   | -3,648 | GCN5-related N-acetyltransferase<br>phosphate ABC transporter, periplasmic       | other enzymes                                  |
| <i>alr4585</i> | 8,663   | 2,375   | -3,648 | phosphate-binding protein                                                        | transport across membrane                      |
| <i>alr4833</i> | 33,799  | 9,284   | -3,641 | cytochrome P450                                                                  | electron transport chain                       |
| <i>all0133</i> | 64,933  | 17,842  | -3,639 | unknown                                                                          | unknown                                        |
| <i>all2916</i> | 3,626   | 0,000   | -3,626 | similar to DnaJ protein                                                          | resistance, adaptations to atypical conditions |
| <i>alr2057</i> | 3,624   | 0,000   | -3,624 | shikimate 5-dehydrogenase; AroK                                                  | amino acids biosynthesis and metabolism        |
| <i>alr2481</i> | 520,298 | 143,648 | -3,622 | two-component sensor histidine kinase                                            | regulatory functions                           |
| <i>all0630</i> | 3,620   | 0,000   | -3,620 | unknown                                                                          | unknown                                        |
| <i>alr1613</i> | 7,846   | 2,182   | -3,595 | PpiC-type peptidyl-prolyl cis-trans isomerase                                    | posttranscriptional modifications              |
| <i>alr3064</i> | 4,214   | 1,172   | -3,595 | probable glycosyl transferase<br>amino acid ABC transporter, periplasmic amino   | sugars                                         |
| <i>alr4164</i> | 5,365   | 1,492   | -3,595 | acid-binding protein                                                             | transport across membrane                      |
| <i>all4868</i> | 10,447  | 2,906   | -3,595 | transposase                                                                      | transposon-related functions                   |
| <i>asr7037</i> | 44,605  | 12,408  | -3,595 | unknown                                                                          | unknown                                        |
| <i>all2375</i> | 13,595  | 3,782   | -3,595 | peroxiredoxin GCT3                                                               | detoxification                                 |
| <i>all1776</i> | 2,963   | 0,824   | -3,595 | unknown                                                                          | unknown                                        |
| <i>all1782</i> | 19,334  | 5,378   | -3,595 | von Willebrand factor, type A<br>4-hydroxy-3-methylbut-2-en-1-yl diphosphate     | unknown                                        |
| <i>all2501</i> | 185,276 | 51,752  | -3,580 | synthase                                                                         | steroids biosynthesis                          |
| <i>alr0044</i> | 326,750 | 91,315  | -3,578 | unknown                                                                          | unknown                                        |
| <i>asr4133</i> | 3,574   | 0,000   | -3,574 | unknown                                                                          | unknown                                        |
| <i>alr4416</i> | 80,835  | 22,653  | -3,568 | cystathionine beta-synthase                                                      | amino acids biosynthesis and metabolism        |
| <i>all3555</i> | 15,554  | 4,366   | -3,562 | acetolactate synthase; IlvB                                                      | amino acids biosynthesis and metabolism        |
| <i>alr0487</i> | 796,791 | 223,829 | -3,560 | unknown                                                                          | unknown                                        |
| <i>alr4815</i> | 23,634  | 6,653   | -3,552 | site-specific DNA-methyltransferase                                              | DNA replication, recombination and repair      |
| <i>alr3761</i> | 33,726  | 9,494   | -3,552 | two-component hybrid sensor and regulator                                        | regulatory functions                           |
| <i>all2145</i> | 10,313  | 2,903   | -3,552 | transposase                                                                      | transposon-related functions                   |
| <i>alr0693</i> | 8,361   | 2,354   | -3,552 | NHL repeat-containing protein                                                    | unknown                                        |

|                |         |         |        |                                                  |                                                                                                            |
|----------------|---------|---------|--------|--------------------------------------------------|------------------------------------------------------------------------------------------------------------|
| <i>alr3175</i> | 12,337  | 3,473   | -3,552 | unknown                                          | unknown                                                                                                    |
| <i>all2852</i> | 389,517 | 109,841 | -3,546 | metallophosphoesterase                           | other enzymes                                                                                              |
| <i>alr3844</i> | 23,009  | 6,496   | -3,542 | BNR repeat-containing glycosyl hydrolase         | unknown                                                                                                    |
| <i>all1268</i> | 3,538   | 0,000   | -3,538 | unknown                                          | unknown                                                                                                    |
| <i>asr9028</i> | 3,538   | 0,000   | -3,538 | unknown                                          | unknown                                                                                                    |
| <i>alr5223</i> | 10,119  | 2,863   | -3,534 | glycosyl transferase                             | sugars                                                                                                     |
| <i>alr4491</i> | 28,946  | 8,203   | -3,529 | glucose-1-phosphate thymidyltransferase          | surface components                                                                                         |
| <i>alr9018</i> | 4,480   | 1,271   | -3,524 | unknown                                          | unknown                                                                                                    |
| <i>all1724</i> | 27,693  | 7,866   | -3,521 | unknown                                          | unknown                                                                                                    |
| <i>alr2412</i> | 11,925  | 3,394   | -3,513 | serine/threonine kinase                          | regulatory functions                                                                                       |
| <i>all2421</i> | 69,721  | 19,862  | -3,510 | unknown                                          | unknown                                                                                                    |
| <i>alr2892</i> | 129,396 | 36,885  | -3,508 | unknown                                          | unknown                                                                                                    |
| <i>all5339</i> | 3,503   | 0,000   | -3,503 | unknown                                          | unknown                                                                                                    |
| <i>all3223</i> | 10,615  | 3,042   | -3,489 | unknown                                          | unknown                                                                                                    |
| <i>alr2946</i> | 3,490   | 1,000   | -3,489 | unknown                                          | unknown                                                                                                    |
| <i>alr2042</i> | 6,327   | 1,813   | -3,489 | von Willebrand factor, type A                    | unknown                                                                                                    |
| <i>all4390</i> | 6,116   | 1,753   | -3,489 | imidazoleglycerol-phosphate dehydratase          | amino acids biosynthesis and metabolism<br>attachment of integral membrane proteins to the<br>cytoskeleton |
| <i>alr3307</i> | 3,260   | 0,934   | -3,489 | ankyrin                                          | cytoskeleton                                                                                               |
| <i>all0948</i> | 4,026   | 1,154   | -3,489 | heme O synthase                                  | cobalamin, heme, phycobilin and porphyrin                                                                  |
|                |         |         |        | fdxN element excision controlling factor protein |                                                                                                            |
| <i>alr1461</i> | 18,614  | 5,335   | -3,489 | XisH                                             | heterocyst differentiation                                                                                 |
| <i>alr4516</i> | 5,329   | 1,527   | -3,489 | probable protein phosphatase                     | other enzymes                                                                                              |
|                |         |         |        | phycocyanin alpha phycocyanobilin lyase related  |                                                                                                            |
| <i>alr3814</i> | 11,623  | 3,331   | -3,489 | protein NbIB                                     | phycobilisomes and phycobiliproteins                                                                       |
| <i>all1692</i> | 12,320  | 3,531   | -3,489 | RNA polymerase sigma-subunit; SigC               | RNA synthesis and modification                                                                             |
| <i>alr4773</i> | 1,647   | 0,472   | -3,489 | alpha-glucosidase                                | sugars                                                                                                     |
| <i>alr0584</i> | 3,203   | 0,918   | -3,489 | probable glycosyl transferase                    | sugars                                                                                                     |
| <i>alr3528</i> | 5,285   | 1,515   | -3,489 | putative beta-phosphoglucomutase                 | sugars                                                                                                     |
| <i>alr4781</i> | 5,932   | 1,700   | -3,489 | sugar ABC transporter, ATP-binding protein       | transport across membrane                                                                                  |
| <i>all1916</i> | 3,065   | 0,879   | -3,489 | sugar transport system, sugar-binding protein    | transport across membrane                                                                                  |
| <i>all2262</i> | 8,982   | 2,574   | -3,489 | unknown                                          | unknown                                                                                                    |
| <i>all2913</i> | 24,511  | 7,025   | -3,489 | unknown                                          | unknown                                                                                                    |
| <i>all3892</i> | 2,936   | 0,841   | -3,489 | unknown                                          | unknown                                                                                                    |
| <i>all3941</i> | 3,800   | 1,089   | -3,489 | unknown                                          | unknown                                                                                                    |
| <i>alr1386</i> | 2,564   | 0,735   | -3,489 | unknown                                          | unknown                                                                                                    |
| <i>alr1808</i> | 4,026   | 1,154   | -3,489 | unknown                                          | unknown                                                                                                    |
| <i>alr4876</i> | 10,034  | 2,876   | -3,489 | unknown                                          | unknown                                                                                                    |
| <i>alr5180</i> | 5,489   | 1,573   | -3,489 | unknown                                          | unknown                                                                                                    |
| <i>all3740</i> | 5,397   | 1,547   | -3,489 | heterocyst differentiation protein HetL          | heterocyst differentiation                                                                                 |
| <i>alr4976</i> | 2,446   | 0,701   | -3,489 | phosphodiesterase/alkaline phosphatase D         | regulatory functions                                                                                       |
| <i>all4713</i> | 3,857   | 1,105   | -3,489 | UDP-glucose 4-epimerase                          | sugars                                                                                                     |



|                |         |         |        |                                                                       |                                                |
|----------------|---------|---------|--------|-----------------------------------------------------------------------|------------------------------------------------|
| <i>all0995</i> | 24,233  | 6,946   | -3,489 | unknown                                                               | unknown                                        |
| <i>alr0230</i> | 2,396   | 0,687   | -3,489 | unknown                                                               | unknown                                        |
| <i>alr1060</i> | 8,506   | 2,438   | -3,489 | unknown                                                               | unknown                                        |
| <i>alr2696</i> | 8,678   | 2,487   | -3,489 | unknown                                                               | unknown                                        |
| <i>alr4911</i> | 9,294   | 2,664   | -3,489 | unknown                                                               | unknown                                        |
| <i>asl0817</i> | 3,485   | 0,000   | -3,485 | unknown                                                               | unknown                                        |
| <i>alr0451</i> | 40,509  | 11,644  | -3,479 | secretion protein HlyD                                                | protein and peptide secretion                  |
| <i>all0800</i> | 3,475   | 0,000   | -3,475 | molybdopterin precursor biosynthesis protein                          | coenzymes and cofactors                        |
| <i>all7644</i> | 240,274 | 69,188  | -3,473 | unknown                                                               | unknown                                        |
| <i>alr1230</i> | 3,468   | 0,000   | -3,468 | two-component response regulator                                      | regulatory functions                           |
| <i>alr0653</i> | 230,064 | 66,663  | -3,451 | similar to rod shape-determining protein                              | cell shape                                     |
| <i>alr4171</i> | 59,849  | 17,364  | -3,447 | L-asparaginase II                                                     | amino acids biosynthesis and metabolism        |
| <i>alr1609</i> | 3,443   | 0,000   | -3,443 | transposase                                                           | transposon-related functions                   |
| <i>alr1158</i> | 74,237  | 21,587  | -3,439 | ribonuclease III                                                      | RNA degradation                                |
| <i>all2340</i> | 7,784   | 2,272   | -3,426 | aspartate transaminase                                                | amino acids biosynthesis and metabolism        |
| <i>alr7323</i> | 12,661  | 3,696   | -3,426 | transposase                                                           | transposon-related functions                   |
| <i>alr0045</i> | 164,839 | 48,120  | -3,426 | ferredoxin                                                            | electron transport chain                       |
| <i>alr0029</i> | 6,656   | 1,948   | -3,416 | WD-40 repeat protein                                                  | regulatory functions                           |
| <i>alr4239</i> | 29,423  | 8,616   | -3,415 | toxin secretion ABC transporter ATP-binding protein                   | transport across membrane                      |
| <i>asr0043</i> | 565,457 | 165,652 | -3,414 | unknown                                                               | unknown                                        |
| <i>all1651</i> | 36,120  | 10,593  | -3,410 | transcriptional regulator                                             | regulatory functions                           |
| <i>alr3067</i> | 36,758  | 10,793  | -3,406 | probable glycosyl transferase                                         | sugars                                         |
| <i>alr1460</i> | 403,849 | 118,594 | -3,405 | unknown                                                               | unknown                                        |
| <i>all1553</i> | 15,657  | 4,601   | -3,403 | NADH dehydrogenase                                                    | respiration, oxidative phosphorylation         |
| <i>alr2502</i> | 12,821  | 3,773   | -3,398 | serine/threonine kinase                                               | regulatory functions                           |
| <i>all0131</i> | 3,384   | 0,000   | -3,384 | unknown                                                               | unknown                                        |
| <i>all2371</i> | 3,384   | 0,000   | -3,384 | unknown                                                               | unknown                                        |
| <i>asr7140</i> | 3,384   | 0,000   | -3,384 | unknown                                                               | unknown                                        |
| <i>alr5360</i> | 6,769   | 2,001   | -3,383 | unknown                                                               | unknown                                        |
| <i>all4406</i> | 9,435   | 2,789   | -3,383 | NB-ARC domain containing protein                                      | resistance, adaptations to atypical conditions |
| <i>all3927</i> | 8,649   | 2,556   | -3,383 | unknown                                                               | unknown                                        |
| <i>all7130</i> | 2,439   | 0,721   | -3,383 | unknown                                                               | unknown                                        |
| <i>asr0654</i> | 28,306  | 8,366   | -3,383 | unknown                                                               | unknown                                        |
| <i>all2058</i> | 127,312 | 37,698  | -3,377 | unknown                                                               | unknown                                        |
| <i>all1697</i> | 45,086  | 13,364  | -3,374 | probable ribonuclease D                                               | RNA synthesis and modification                 |
| <i>alr4282</i> | 37,937  | 11,296  | -3,358 | heterocyst specific ABC-transporter, ATP-binding subunit DevA homolog | transport across membrane, heterocyst          |
| <i>all0747</i> | 12,238  | 3,650   | -3,353 | carboxysome formation protein CcmA                                    | CO2 concentration mechanisms                   |
| <i>alr2361</i> | 131,720 | 39,300  | -3,352 | mannose-1-phosphate guanyltransferase                                 | sugars                                         |
| <i>all7012</i> | 86,410  | 25,892  | -3,337 | unknown                                                               | unknown                                        |
| <i>all1053</i> | 39,080  | 11,716  | -3,336 | glutamyl-tRNA (Gln) amidotransferase subunit A                        | aminoacyl tRNA synthetases and tRNA            |

|                |          |         |        |                                                                   |                                                      |
|----------------|----------|---------|--------|-------------------------------------------------------------------|------------------------------------------------------|
| <i>alr1539</i> | 15,718   | 4,719   | -3,330 | cupin domain containing protein                                   | modification                                         |
| <i>all1248</i> | 45,618   | 13,697  | -3,330 | pyridoxamine 5-phosphate oxidase                                  | unknown                                              |
| <i>alr4062</i> | 80,983   | 24,316  | -3,330 | HTTM domain containing protein                                    | vitamin biosynthesis                                 |
| <i>all2995</i> | 39,232   | 11,780  | -3,330 | undecaprenyl pyrophosphate synthetase                             | unknown                                              |
| <i>all4307</i> | 28,130   | 8,446   | -3,330 | radical SAM domain-containing protein                             | carotenoids                                          |
| <i>alr3706</i> | 4,483    | 1,346   | -3,330 | serine/threonine kinase                                           | energy production and conversion                     |
|                |          |         |        |                                                                   | regulatory functions                                 |
| <i>all4371</i> | 18,477   | 5,577   | -3,313 | peptidase M48, Ste24p                                             | degradation of proteins, peptides, and glycopeptides |
| <i>alr0547</i> | 8,058    | 2,432   | -3,313 | probable protein phosphatase                                      | other enzymes                                        |
| <i>all3914</i> | 13,418   | 4,050   | -3,313 | succinyl-CoA synthetase beta chain                                | TCA cycle                                            |
|                |          |         |        |                                                                   | degradation of proteins, peptides, and glycopeptides |
| <i>all4335</i> | 246,974  | 74,641  | -3,309 | peptidase S16, lon domain-containing protein                      | glycopeptides                                        |
| <i>all3733</i> | 3,305    | 0,000   | -3,305 | unknown                                                           | unknown                                              |
| <i>all2613</i> | 9,284    | 2,814   | -3,299 | transcriptional regulator                                         | regulatory functions                                 |
|                |          |         |        | chromosome segregation and condensation protein                   |                                                      |
| <i>alr3399</i> | 11,039   | 3,346   | -3,299 | ScpA                                                              | unknown                                              |
| <i>all3458</i> | 17,548   | 5,320   | -3,299 | unknown                                                           | unknown                                              |
| <i>alr2993</i> | 1926,556 | 585,039 | -3,293 | DnaJ protein                                                      | heat shock proteins and chaperones                   |
| <i>asr4809</i> | 3,289    | 0,000   | -3,289 | inorganic carbon transport; IctA                                  | redox reactions                                      |
| <i>alr3905</i> | 3,280    | 0,000   | -3,280 | rhodanese-like                                                    | detoxification                                       |
| <i>all4704</i> | 3,280    | 0,000   | -3,280 | pyridoxamine 5'-phosphate oxidase                                 | vitamin biosynthesis                                 |
| <i>alr2082</i> | 3,274    | 0,000   | -3,274 | cobalamin biosynthetic protein CobD                               | cobalamin, heme, phycobilin and porphyrin            |
| <i>all7137</i> | 3,274    | 0,000   | -3,274 | unknown                                                           | unknown                                              |
| <i>alr4852</i> | 3,274    | 0,000   | -3,274 | unknown                                                           | unknown                                              |
| <i>all5218</i> | 9,404    | 2,882   | -3,262 | putative modulator of DNA gyrase; PmbA                            | DNA replication, recombination and repair            |
| <i>all7151</i> | 25,630   | 7,856   | -3,262 | unknown                                                           | unknown                                              |
| <i>alr3213</i> | 3,261    | 0,000   | -3,261 | unknown                                                           | unknown                                              |
| <i>all3875</i> | 73,223   | 22,461  | -3,260 | phosphatidate cytidyltransferase                                  | lipid metabolism                                     |
| <i>all4442</i> | 24,915   | 7,655   | -3,255 | unknown                                                           | unknown                                              |
| <i>all2263</i> | 16,508   | 5,077   | -3,251 | heat shock protein X                                              | heat shock proteins and chaperones                   |
| <i>alr3701</i> | 124,659  | 38,359  | -3,250 | type II site-specific deoxyribonuclease                           | DNA degradation and modification                     |
| <i>alr4448</i> | 93,287   | 28,834  | -3,235 | endo-1,4-beta-xylanase                                            | sugars                                               |
|                |          |         |        | pyruvate-flavodoxin dehydrogenase; nitrogen fixation protein NifJ | nitrogen fixation                                    |
| <i>alr2803</i> | 23,255   | 7,209   | -3,226 | septum site-determining protein MinC                              | cell division                                        |
| <i>alr3455</i> | 47,801   | 14,823  | -3,225 | protein serine-threonine phosphatase; PrpA                        | regulatory functions                                 |
| <i>alr3731</i> | 8,292    | 2,571   | -3,225 | unknown                                                           | unknown                                              |
| <i>all1210</i> | 3,218    | 0,000   | -3,218 | FAD-dependent pyridine nucleotide-disulphide oxidoreductase       | posttranslational modifications                      |
| <i>all4510</i> | 243,429  | 75,854  | -3,209 | unknown                                                           | unknown                                              |
| <i>asl7051</i> | 3,199    | 0,000   | -3,199 | unknown                                                           | unknown                                              |
| <i>alr0222</i> | 44,979   | 14,084  | -3,194 | citrate synthase; GltA                                            | TCA cycle                                            |

|                |         |         |        |                                                  |                                                |
|----------------|---------|---------|--------|--------------------------------------------------|------------------------------------------------|
| <i>all2931</i> | 320,909 | 100,711 | -3,186 | glyoxalase/bleomycin resistance                  | resistance, adaptations to atypical conditions |
| <i>alr9014</i> | 920,866 | 289,890 | -3,177 | protein/dioxygenase                              | unknown                                        |
| <i>all5327</i> | 2,085   | 0,657   | -3,172 | unknown                                          | regulatory functions                           |
| <i>all8558</i> | 4,170   | 1,315   | -3,172 | two-component sensor histidine kinase            | unknown                                        |
| <i>asr0755</i> | 6,346   | 2,001   | -3,172 | unknown                                          | unknown                                        |
|                |         |         |        | carbon dioxide concentrating mechanism protein   |                                                |
| <i>alr0318</i> | 4,947   | 1,560   | -3,172 | CcmK                                             | CO2 concentration mechanisms                   |
| <i>all0245</i> | 3,208   | 1,011   | -3,172 | tocopherol cyclase                               | coenzymes and cofactors                        |
|                |         |         |        |                                                  | degradation of proteins, peptides, and         |
| <i>alr3815</i> | 0,703   | 0,222   | -3,172 | peptidase                                        | glycopeptides                                  |
| <i>alr0510</i> | 0,871   | 0,275   | -3,172 | type I site-specific deoxyribonuclease           | DNA degradation and modification               |
| <i>all2684</i> | 3,243   | 1,023   | -3,172 | similar to restriction enzyme, restriction chain | DNA replication, recombination and repair      |
| <i>alr4060</i> | 4,885   | 1,540   | -3,172 | probable alginate O-acetylation protein          | exopolysaccharide biosynthesis                 |
| <i>alr4717</i> | 2,690   | 0,848   | -3,172 | hydrogenase accessory protein HupE               | other enzymes                                  |
| <i>alr0512</i> | 2,170   | 0,684   | -3,172 | nucleoside triphosphate pyrophosphohydrolase     | purine/pyrimidine biosynthesis and metabolism  |
| <i>alr4011</i> | 2,272   | 0,716   | -3,172 | probable oxidoreductase                          | redox reactions                                |
| <i>alr3252</i> | 3,434   | 1,083   | -3,172 | short-chain dehydrogenase/reductase              | redox reactions                                |
|                |         |         |        | predicted signal transduction protein containing |                                                |
| <i>alr1232</i> | 8,007   | 2,524   | -3,172 | Nacht domain                                     | regulatory functions                           |
| <i>alr4141</i> | 1,574   | 0,496   | -3,172 | serine/threonine kinase                          | regulatory functions                           |
| <i>all0352</i> | 11,723  | 3,696   | -3,172 | NADPH-dependent carbonyl reductase               | sugars                                         |
| <i>alr1521</i> | 4,979   | 1,570   | -3,172 | putative invertase                               | sugars                                         |
| <i>alr1793</i> | 2,006   | 0,632   | -3,172 | putative oligosaccharide deacetylase             | sugars                                         |
| <i>all4956</i> | 1,471   | 0,464   | -3,172 | coproporphyrinogen III oxidase, HemF             | tetrapyrrole biosynthesis pathway              |
| <i>all4219</i> | 2,115   | 0,667   | -3,172 | ABC-2 type transport system permease             | transport across membrane                      |
| <i>all8070</i> | 2,298   | 0,725   | -3,172 | transposase                                      | transposon-related functions                   |
| <i>all4401</i> | 1,574   | 0,496   | -3,172 | unknown                                          | unknown                                        |
| <i>all4982</i> | 2,298   | 0,725   | -3,172 | unknown                                          | unknown                                        |
| <i>all5281</i> | 5,780   | 1,822   | -3,172 | unknown                                          | unknown                                        |
| <i>alr0381</i> | 1,557   | 0,491   | -3,172 | unknown                                          | unknown                                        |
| <i>alr0452</i> | 4,314   | 1,360   | -3,172 | unknown                                          | unknown                                        |
| <i>alr1378</i> | 2,245   | 0,708   | -3,172 | unknown                                          | unknown                                        |
| <i>alr1790</i> | 5,121   | 1,615   | -3,172 | unknown                                          | unknown                                        |
| <i>alr1923</i> | 5,809   | 1,831   | -3,172 | unknown                                          | unknown                                        |
| <i>alr3592</i> | 0,565   | 0,178   | -3,172 | unknown                                          | unknown                                        |
| <i>alr4505</i> | 1,622   | 0,511   | -3,172 | unknown                                          | unknown                                        |
| <i>alr4606</i> | 0,756   | 0,238   | -3,172 | unknown                                          | unknown                                        |
| <i>alr4720</i> | 5,724   | 1,804   | -3,172 | unknown                                          | unknown                                        |
| <i>alr5271</i> | 9,267   | 2,922   | -3,172 | unknown                                          | unknown                                        |
| <i>alr7079</i> | 3,057   | 0,964   | -3,172 | unknown                                          | unknown                                        |
| <i>alr9505</i> | 5,724   | 1,804   | -3,172 | unknown                                          | unknown                                        |

|                |        |        |        |                                                  |                                                |
|----------------|--------|--------|--------|--------------------------------------------------|------------------------------------------------|
| <i>asl2557</i> | 7,207  | 2,272  | -3,172 | unknown                                          | unknown                                        |
| <i>asl4482</i> | 8,982  | 2,832  | -3,172 | unknown                                          | unknown                                        |
| <i>asr0636</i> | 13,737 | 4,331  | -3,172 | unknown                                          | unknown                                        |
| <i>asr3881</i> | 10,615 | 3,346  | -3,172 | unknown                                          | unknown                                        |
| <i>asr7230</i> | 11,447 | 3,609  | -3,172 | unknown                                          | unknown                                        |
|                |        |        |        | similar to ubiquinone/menaquinone biosynthesis   |                                                |
| <i>alr3527</i> | 3,892  | 1,227  | -3,172 | methyltransferase                                | vitamin biosynthesis                           |
|                |        |        |        | imidazoleglycerol-phosphate synthase, cyclase    |                                                |
| <i>alr2895</i> | 22,454 | 7,079  | -3,172 | subunit HisF                                     | amino acids biosynthesis and metabolism        |
| <i>alr4746</i> | 5,897  | 1,859  | -3,172 | indole-3-glycerol phosphate synthase             | amino acids biosynthesis and metabolism        |
|                |        |        |        |                                                  | aminoacyl tRNA synthetases and tRNA            |
| <i>alr3882</i> | 2,308  | 0,727  | -3,172 | tRNA methyltransferase                           | modification                                   |
| <i>alr2903</i> | 2,138  | 0,674  | -3,172 | NAD-dependent epimerase/dehydratase              | cell wall/membrane biogenesis                  |
| <i>all7277</i> | 1,364  | 0,430  | -3,172 | HNH endonuclease                                 | DNA degradation and modification               |
| <i>all2277</i> | 6,211  | 1,958  | -3,172 | aldo/keto reductase                              | other enzymes                                  |
| <i>alr0234</i> | 2,412  | 0,761  | -3,172 | phospholipid/glycerol acyltransferase            | phospholipid biosynthesis, membrane biogenesis |
| <i>all1512</i> | 3,261  | 1,028  | -3,172 | cytochrome b6/f-complex iron-sulfur protein PetC | photosynthesis                                 |
| <i>all0637</i> | 1,330  | 0,419  | -3,172 | two-component hybrid sensor and regulator        | regulatory functions                           |
| <i>all2095</i> | 1,411  | 0,445  | -3,172 | two-component sensor histidine kinase            | regulatory functions                           |
| <i>all2284</i> | 3,517  | 1,109  | -3,172 | sigma-B activity negative regulator; RsbW        | regulatory functions                           |
| <i>alr5126</i> | 4,054  | 1,278  | -3,172 | aminoglycoside phosphotransferase                | resistance, adaptations to atypical conditions |
|                |        |        |        | glyoxalase/bleomycin resistance                  |                                                |
| <i>alr2922</i> | 8,585  | 2,707  | -3,172 | protein/dioxygenase                              | resistance, adaptations to atypical conditions |
| <i>all3791</i> | 2,780  | 0,876  | -3,172 | ribonuclease D                                   | RNA degradation                                |
| <i>alr0075</i> | 2,373  | 0,748  | -3,172 | surface antigen (D15)                            | surface components                             |
| <i>alr3795</i> | 5,033  | 1,587  | -3,172 | translation initiation factor Sui1               | translation                                    |
| <i>alr1201</i> | 1,615  | 0,509  | -3,172 | ABC transporter ATP-binding protein              | transport across membrane                      |
| <i>all0640</i> | 3,202  | 1,009  | -3,172 | ABC transporter, ATP-binding protein             | transport across membrane                      |
| <i>all2904</i> | 17,917 | 5,649  | -3,172 | major facilitator superfamily transporter        | transport across membrane                      |
| <i>alr2363</i> | 1,240  | 0,391  | -3,172 | major facilitator transporter                    | transport across membrane                      |
| <i>all0127</i> | 6,828  | 2,153  | -3,172 | unknown                                          | unknown                                        |
| <i>all0231</i> | 4,537  | 1,430  | -3,172 | unknown                                          | unknown                                        |
| <i>all0667</i> | 1,211  | 0,382  | -3,172 | unknown                                          | unknown                                        |
| <i>all0918</i> | 2,422  | 0,764  | -3,172 | unknown                                          | unknown                                        |
| <i>all1326</i> | 95,968 | 30,256 | -3,172 | unknown                                          | unknown                                        |
| <i>all2333</i> | 1,959  | 0,618  | -3,172 | unknown                                          | unknown                                        |
| <i>all2415</i> | 11,492 | 3,623  | -3,172 | unknown                                          | unknown                                        |
| <i>all2788</i> | 3,971  | 1,252  | -3,172 | unknown                                          | unknown                                        |
| <i>all3127</i> | 3,853  | 1,215  | -3,172 | unknown                                          | unknown                                        |
| <i>all3669</i> | 4,457  | 1,405  | -3,172 | unknown                                          | unknown                                        |
| <i>all3839</i> | 1,330  | 0,419  | -3,172 | unknown                                          | unknown                                        |
| <i>all4348</i> | 1,474  | 0,465  | -3,172 | unknown                                          | unknown                                        |

|                 |          |          |        |                                                  |                                               |
|-----------------|----------|----------|--------|--------------------------------------------------|-----------------------------------------------|
| <i>all4408</i>  | 5,560    | 1,753    | -3,172 | unknown                                          | unknown                                       |
| <i>all7197</i>  | 2,820    | 0,889    | -3,172 | unknown                                          | unknown                                       |
| <i>alr1377</i>  | 12,388   | 3,906    | -3,172 | unknown                                          | unknown                                       |
| <i>alr1910</i>  | 1,966    | 0,620    | -3,172 | unknown                                          | unknown                                       |
| <i>alr2889</i>  | 10,363   | 3,267    | -3,172 | unknown                                          | unknown                                       |
| <i>alr3565</i>  | 1,659    | 0,523    | -3,172 | unknown                                          | unknown                                       |
| <i>alr3718</i>  | 2,308    | 0,727    | -3,172 | unknown                                          | unknown                                       |
| <i>alr3729</i>  | 4,200    | 1,324    | -3,172 | unknown                                          | unknown                                       |
| <i>alr4836</i>  | 3,672    | 1,158    | -3,172 | unknown                                          | unknown                                       |
| <i>asr1064</i>  | 95,849   | 30,218   | -3,172 | unknown                                          | unknown                                       |
| <i>asr3218</i>  | 11,015   | 3,473    | -3,172 | unknown                                          | unknown                                       |
| <i>asr3299</i>  | 12,163   | 3,835    | -3,172 | unknown                                          | unknown                                       |
| <i>alr4386</i>  | 6,081    | 1,917    | -3,172 | dihydropteroate synthase                         | vitamin biosynthesis                          |
| <i>alr4438</i>  | 4,561    | 1,438    | -3,172 | transposase                                      | transposon-related functions                  |
| <i>alr5141</i>  | 3,156    | 0,000    | -3,156 | unknown                                          | unknown                                       |
| <i>asl0026</i>  | 3,156    | 0,000    | -3,156 | unknown                                          | unknown                                       |
| <i>asl3973</i>  | 3,156    | 0,000    | -3,156 | unknown                                          | unknown                                       |
| <i>asr2504</i>  | 3,156    | 0,000    | -3,156 | unknown                                          | unknown                                       |
| <i>all3837</i>  | 73,344   | 23,256   | -3,154 | unknown                                          | unknown                                       |
| <i>all2550</i>  | 94,470   | 30,118   | -3,137 | unknown                                          | unknown                                       |
| <i>alr2465</i>  | 3,135    | 0,000    | -3,135 | thioesterase superfamily protein                 | other enzymes                                 |
| <i>alr0946</i>  | 127,229  | 40,620   | -3,132 | transcriptional regulator, AbrB family           | regulatory functions                          |
| <i>all1747</i>  | 78,839   | 25,170   | -3,132 | unknown                                          | unknown                                       |
| <i>alr2525</i>  | 3,128    | 0,000    | -3,128 | unknown                                          | unknown                                       |
| <i>all4196</i>  | 37,237   | 11,939   | -3,119 | adenylate kinase                                 | regulatory functions                          |
|                 |          |          |        | nitrogenase molybdenum-iron protein alpha chain, |                                               |
| <i>all1454C</i> | 1,480    | 0,475    | -3,114 | Cend fragment (nifD3')                           | nitrogen fixation                             |
| <i>asr4987</i>  | 3,114    | 0,000    | -3,114 | unknown                                          | unknown                                       |
| <i>alr3672</i>  | 23,555   | 7,586    | -3,105 | aldehyde dehydrogenase                           | aldehyde metabolism                           |
| <i>alr2385</i>  | 7972,126 | 2567,522 | -3,105 | HesB/YadR/YfhF family protein                    | Fe-S cluster assembly accessory protein       |
| <i>alr4917</i>  | 9,125    | 2,942    | -3,101 | unknown                                          | unknown                                       |
| <i>alr1867</i>  | 3,100    | 0,000    | -3,100 | transcriptional regulator                        | regulatory functions                          |
| <i>alr1819</i>  | 176,499  | 56,962   | -3,099 | beta-Ig-H3/fasciclin domain containing protein   | unknown                                       |
| <i>alr4912</i>  | 3,089    | 0,000    | -3,089 | unknown                                          | unknown                                       |
| <i>all2929</i>  | 3,084    | 0,000    | -3,084 | carbonic anhydrase; EcaA                         | other enzymes                                 |
|                 |          |          |        | PBS lyase HEAT domain protein repeat-            |                                               |
| <i>alr0616</i>  | 17,488   | 5,676    | -3,081 | containing protein                               | energy production and conversion              |
| <i>all0934</i>  | 86,472   | 28,109   | -3,076 | site-specific DNA-methyltransferase              | DNA replication, recombination and repair     |
| <i>all2381</i>  | 3,073    | 0,000    | -3,073 | cyclase/dehydrase                                | other enzymes                                 |
| <i>asr3002</i>  | 3,073    | 0,000    | -3,073 | aspartate carbamoyltransferase                   | purine/pyrimidine biosynthesis and metabolism |
| <i>asr0890</i>  | 3,073    | 0,000    | -3,073 | unknown                                          | unknown                                       |
| <i>alr7249</i>  | 31,844   | 10,374   | -3,070 | unknown                                          | unknown                                       |

|                |         |         |        |                                              |                                                      |
|----------------|---------|---------|--------|----------------------------------------------|------------------------------------------------------|
| <i>asl0885</i> | 220,831 | 72,022  | -3,066 | photosystem II protein PsbK                  | photosynthesis                                       |
| <i>all4826</i> | 10,749  | 3,506   | -3,066 | dTDP-glucose dehydratase                     | surface components                                   |
| <i>alr2414</i> | 29,573  | 9,645   | -3,066 | unknown                                      | unknown                                              |
| <i>alr1343</i> | 26,732  | 8,719   | -3,066 | thiamin-phosphate pyrophosphorylase          | vitamin biosynthesis                                 |
| <i>all1640</i> | 3,053   | 0,000   | -3,053 | two-component response regulator             | regulatory functions                                 |
| <i>alr7276</i> | 3,053   | 0,000   | -3,053 | unknown                                      | unknown                                              |
| <i>alr1911</i> | 9,927   | 3,254   | -3,051 | pyruvate flavodoxin dehydrogenase NifJ       | nitrogen fixation                                    |
| <i>all0661</i> | 5,924   | 1,946   | -3,045 | adenylate cyclase                            | regulatory functions                                 |
| <i>alr4849</i> | 9,248   | 3,037   | -3,045 | methanol dehydrogenase regulatory protein    | regulatory functions                                 |
| <i>alr0963</i> | 2,692   | 0,884   | -3,045 | TPR repeat-containing protein                | unknown                                              |
| <i>asr4470</i> | 3,033   | 0,000   | -3,033 | unknown                                      | unknown                                              |
|                |         |         |        |                                              | degradation of proteins, peptides, and glycopeptides |
| <i>all4936</i> | 7,772   | 2,564   | -3,031 | cell division protein FtsH                   | glycopeptides                                        |
| <i>alr3546</i> | 9,281   | 3,068   | -3,025 | heterocyst differentiation protein HetF      | heterocyst differentiation                           |
| <i>all4429</i> | 3,023   | 0,000   | -3,023 | similar to hemolytic protein HlpA            | resistance, adaptations to atypical conditions       |
| <i>alr4165</i> | 3,023   | 0,000   | -3,023 | amino acid ABC transporter, permease protein | transport across membrane                            |
|                |         |         |        |                                              | aminoacyl tRNA synthetases and tRNA modification     |
| <i>all3205</i> | 4,612   | 1,531   | -3,013 | glutamyl-tRNA synthetase; GltX               | modification                                         |
| <i>all4761</i> | 12,463  | 4,136   | -3,013 | dual specificity protein phosphatase         | regulatory functions                                 |
| <i>all0443</i> | 7,624   | 2,530   | -3,013 | TPR repeat-containing protein                | unknown                                              |
| <i>all2487</i> | 404,252 | 134,157 | -3,013 | TPR repeat-containing protein                | unknown                                              |
| <i>alr0617</i> | 46,952  | 15,582  | -3,013 | unknown                                      | unknown                                              |
| <i>alr2712</i> | 6,563   | 2,178   | -3,013 | unknown                                      | unknown                                              |
| <i>alr4589</i> | 11,148  | 3,700   | -3,013 | unknown                                      | unknown                                              |
| <i>all2410</i> | 4,384   | 1,455   | -3,013 | putative phenylacetate-CoA ligase            | amino acids biosynthesis and metabolism              |
| <i>all0197</i> | 7,980   | 2,648   | -3,013 | unknown                                      | unknown                                              |
| <i>all1987</i> | 13,050  | 4,331   | -3,013 | unknown                                      | unknown                                              |
| <i>alr2408</i> | 8,803   | 2,922   | -3,013 | unknown                                      | unknown                                              |
| <i>all3984</i> | 64,420  | 21,420  | -3,007 | unknown                                      | unknown                                              |
| <i>all1124</i> | 3,007   | 0,000   | -3,007 | probable glutathione S-transferase           | detoxification                                       |
| <i>asl1934</i> | 2,994   | 0,000   | -2,994 | unknown                                      | unknown                                              |
| <i>asl4862</i> | 2,994   | 0,000   | -2,994 | unknown                                      | unknown                                              |
| <i>asr3960</i> | 2,994   | 0,000   | -2,994 | unknown                                      | unknown                                              |
| <i>alr1519</i> | 8,450   | 2,825   | -2,991 | amino acid transporter                       | transport across membrane                            |
| <i>alr3936</i> | 21,831  | 7,300   | -2,991 | histidinol-phosphate aminotransferase        | amino acids biosynthesis and metabolism              |
| <i>all0293</i> | 15,691  | 5,251   | -2,988 | unknown                                      | unknown                                              |
| <i>asl4451</i> | 205,953 | 69,021  | -2,984 | 30S ribosomal protein S18                    | ribosome component                                   |
| <i>alr2718</i> | 2,983   | 0,000   | -2,983 | probable cobyric acid synthase               | tetrapyrrole biosynthesis pathway                    |
| <i>alr1390</i> | 9,406   | 3,163   | -2,974 | unknown                                      | unknown                                              |
| <i>all1480</i> | 2,968   | 0,000   | -2,968 | unknown                                      | unknown                                              |
| <i>all2030</i> | 2,968   | 0,000   | -2,968 | unknown                                      | unknown                                              |
| <i>all7319</i> | 885,564 | 298,794 | -2,964 | unknown                                      | unknown                                              |

|                |         |         |        |                                                      |                                                      |
|----------------|---------|---------|--------|------------------------------------------------------|------------------------------------------------------|
| <i>alr3222</i> | 2,963   | 0,000   | -2,963 | chromosome partitioning protein, ParA family         | nucleoproteins                                       |
| <i>alr0763</i> | 2,963   | 0,000   | -2,963 | unknown                                              | unknown                                              |
| <i>all3826</i> | 27,019  | 9,127   | -2,960 | peptidoglycan-binding domain 1                       | surface components                                   |
| <i>all4453</i> | 8,741   | 2,953   | -2,960 | RDD domain-containing protein                        | surface components                                   |
| <i>all0157</i> | 7,330   | 2,476   | -2,960 | unknown                                              | unknown                                              |
| <i>alr0335</i> | 10,615  | 3,586   | -2,960 | threonyl-tRNA synthetase; ThrS                       | aminoacyl tRNA synthetases and tRNA modification     |
| <i>alr0286</i> | 32,477  | 10,970  | -2,960 | small heat shock protein                             | heat shock proteins and chaperones                   |
| <i>alr5010</i> | 9,867   | 3,333   | -2,960 | D-hydantoinase                                       | purine/pyrimidine biosynthesis and metabolism        |
| <i>alr3594</i> | 11,760  | 3,972   | -2,960 | two-component response regulator                     | regulatory functions                                 |
| <i>alr2176</i> | 5,061   | 1,710   | -2,960 | ABC transporter, iron(III) dicitrate-binding protein | transport across membrane                            |
| <i>alr3811</i> | 20,692  | 6,990   | -2,960 | unknown                                              | unknown                                              |
| <i>alr4821</i> | 9,261   | 3,128   | -2,960 | unknown                                              | unknown                                              |
| <i>all3341</i> | 5,413   | 1,828   | -2,960 | heterodisulfide reductase, subunit B                 | vitamin biosynthesis                                 |
| <i>alr4114</i> | 2,956   | 0,000   | -2,956 | TspO and MBR related proteins                        | regulatory functions                                 |
| <i>asl1778</i> | 2,956   | 0,000   | -2,956 | unknown                                              | unknown                                              |
| <i>alr0255</i> | 28,716  | 9,727   | -2,952 | unknown                                              | unknown                                              |
| <i>all1738</i> | 21,729  | 7,428   | -2,925 | carboxyl-terminal protease                           | degradation of proteins, peptides, and glycopeptides |
| <i>alr1792</i> | 2,919   | 0,000   | -2,919 | GDSL family lipase                                   | lipid metabolism                                     |
| <i>alr7505</i> | 2,919   | 0,000   | -2,919 | unknown                                              | unknown                                              |
| <i>all1318</i> | 5,292   | 1,813   | -2,918 | valyl-tRNA synthetase; ValS                          | aminoacyl tRNA synthetases and tRNA modification     |
| <i>alr4559</i> | 3,412   | 1,169   | -2,918 | WD-40 repeat-protein                                 | regulatory functions                                 |
| <i>alr2450</i> | 10,134  | 3,473   | -2,918 | glycoside hydrolase                                  | sugars                                               |
| <i>all2624</i> | 9,489   | 3,252   | -2,918 | unknown                                              | unknown                                              |
| <i>alr0518</i> | 20,980  | 7,190   | -2,918 | unknown                                              | unknown                                              |
| <i>alr3505</i> | 2,066   | 0,708   | -2,918 | unknown                                              | unknown                                              |
| <i>alr2979</i> | 2,910   | 0,000   | -2,910 | heat shock protein DnaJ-like                         | heat shock proteins and chaperones                   |
| <i>all5052</i> | 47,824  | 16,441  | -2,909 | phospholipid/glycerol acyltransferase                | phospholipid biosynthesis, membrane biogenesis       |
| <i>all7235</i> | 7,609   | 2,617   | -2,908 | filamentous haemagglutinin-like protein              | surface components                                   |
| <i>asr9501</i> | 85,625  | 29,449  | -2,908 | unknown                                              | unknown                                              |
| <i>all4538</i> | 27,473  | 9,474   | -2,900 | mannose-6-phosphate isomerase                        | sugars                                               |
| <i>alr4043</i> | 31,136  | 10,737  | -2,900 | rhodanese domain-containing protein                  | detoxification                                       |
| <i>all3865</i> | 383,998 | 132,588 | -2,896 | molybdenum cofactor biosynthesis protein A           | coenzymes and cofactors                              |
| <i>alr4169</i> | 776,880 | 268,267 | -2,896 | Iojap-related protein                                | unknown                                              |
| <i>alr4235</i> | 12,338  | 4,269   | -2,890 | ornithine acetyl transferase                         | nitrogen metabolism                                  |
| <i>all2080</i> | 34,690  | 12,004  | -2,890 | transcriptional regulator AbrB                       | regulatory functions                                 |
| <i>all3785</i> | 40,171  | 13,917  | -2,886 | abortive infection protein                           | resistance, adaptations to atypical conditions       |
| <i>alr3955</i> | 135,769 | 47,084  | -2,884 | thioredoxin                                          | redox homeostasis                                    |
| <i>asr5142</i> | 2,883   | 0,000   | -2,883 | unknown                                              | unknown                                              |

|                |         |        |        |                                                                                             |                                                             |
|----------------|---------|--------|--------|---------------------------------------------------------------------------------------------|-------------------------------------------------------------|
| <i>alr2122</i> | 2,876   | 0,000  | -2,876 | unknown<br>serine/threonine kinase with two-component<br>sensor domain                      | unknown<br>regulatory functions                             |
| <i>all4687</i> | 4,729   | 1,646  | -2,873 | ferredoxin I                                                                                | electron transport chain                                    |
| <i>all4148</i> | 100,414 | 34,971 | -2,871 | heterocyst-specific glycolipids-directing protein<br>HglK                                   | heterocyst differentiation                                  |
| <i>all0813</i> | 13,793  | 4,804  | -2,871 | transposase                                                                                 | transposon-related functions                                |
| <i>alr2698</i> | 2,869   | 0,000  | -2,869 | unknown                                                                                     | unknown                                                     |
| <i>all7121</i> | 17,472  | 6,091  | -2,868 | solanesyl diphosphate synthase; Sds                                                         | carotenoids                                                 |
| <i>alr0096</i> | 6,487   | 2,272  | -2,855 | 3-oxoacyl-[acyl-carrier protein] reductase                                                  | lipid metabolism                                            |
| <i>alr1894</i> | 4,170   | 1,461  | -2,855 | probable pseudouridine synthase                                                             | posttranscriptional modifications                           |
| <i>alr0545</i> | 5,126   | 1,796  | -2,855 | transcriptional regulator                                                                   | regulatory functions                                        |
| <i>alr0810</i> | 5,101   | 1,787  | -2,855 | glycyl-tRNA synthetase alpha chain                                                          | aminoacyl tRNA synthetases and tRNA<br>modification         |
| <i>all1985</i> | 3,562   | 1,248  | -2,855 | cell-division protein                                                                       | cell division                                               |
| <i>all1757</i> | 3,491   | 1,223  | -2,855 | subtilase family protein                                                                    | degradation of proteins, peptides, and<br>glycopeptides     |
| <i>alr1615</i> | 0,725   | 0,254  | -2,855 | trypsin; PrcA                                                                               | degradation of proteins, peptides, and<br>glycopeptides     |
| <i>alr1381</i> | 19,020  | 6,663  | -2,855 | isopentenyl pyrophosphate isomerase                                                         | energy production and conversion                            |
| <i>all4591</i> | 2,994   | 1,049  | -2,855 | 1-pyrroline-5 carboxylate dehydrogenase<br>similar to 8R-lipoxygenase-allene oxide synthase | glutamate metabolism and arginine and proline<br>metabolism |
| <i>alr0540</i> | 8,432   | 2,954  | -2,855 | fusion protein                                                                              | redox reactions                                             |
| <i>all8020</i> | 16,292  | 5,707  | -2,855 | CopG/Arc/MetJ DNA-binding domain<br>transcriptional regulator                               | regulatory functions                                        |
| <i>asr7363</i> | 24,438  | 8,561  | -2,855 | FHA domain containing protein                                                               | regulatory functions                                        |
| <i>all4084</i> | 5,417   | 1,897  | -2,855 | two-component response regulator                                                            | regulatory functions                                        |
| <i>alr9013</i> | 4,691   | 1,643  | -2,855 | two-component sensor histidine kinase                                                       | regulatory functions                                        |
| <i>all0330</i> | 3,132   | 1,097  | -2,855 | two-component sensor histidine kinase                                                       | regulatory functions                                        |
| <i>all1145</i> | 3,274   | 1,147  | -2,855 | glycine cleavage T-protein;<br>aminomethyltransferase                                       | salvage pathways                                            |
| <i>all4055</i> | 3,204   | 1,122  | -2,855 | major facilitator superfamily MFS_1                                                         | transport across membrane                                   |
| <i>alr2434</i> | 2,640   | 0,925  | -2,855 | RNA-directed DNA polymerase (Reverse<br>transcriptase)                                      | transposon-related functions                                |
| <i>alr3493</i> | 5,838   | 2,045  | -2,855 | unknown                                                                                     | unknown                                                     |
| <i>all0479</i> | 2,367   | 0,829  | -2,855 | unknown                                                                                     | unknown                                                     |
| <i>all0802</i> | 2,013   | 0,705  | -2,855 | unknown                                                                                     | unknown                                                     |
| <i>all2267</i> | 10,104  | 3,540  | -2,855 | unknown                                                                                     | unknown                                                     |
| <i>all3398</i> | 8,042   | 2,817  | -2,855 | unknown                                                                                     | unknown                                                     |
| <i>all5107</i> | 1,186   | 0,415  | -2,855 | unknown                                                                                     | unknown                                                     |
| <i>all7660</i> | 2,660   | 0,932  | -2,855 | unknown                                                                                     | unknown                                                     |
| <i>alr1870</i> | 3,002   | 1,052  | -2,855 | unknown                                                                                     | unknown                                                     |



|                 |         |          |        |                                                                 |                                                                                         |
|-----------------|---------|----------|--------|-----------------------------------------------------------------|-----------------------------------------------------------------------------------------|
| <i>alr3596</i>  | 21,779  | 7,629    | -2,855 | unknown                                                         | unknown                                                                                 |
| <i>alr5224</i>  | 7,247   | 2,539    | -2,855 | unknown                                                         | unknown                                                                                 |
| <i>alr7604</i>  | 29,716  | 10,409   | -2,855 | unknown                                                         | unknown                                                                                 |
| <i>alr4036</i>  | 5,389   | 1,888    | -2,855 | pyridoxamine 5'-phosphate oxidase-related, FMN-binding          | vitamin biosynthesis                                                                    |
| <i>alr5286</i>  | 4,105   | 1,438    | -2,855 | probable short-chain dehydrogenase                              | other enzymes                                                                           |
| <i>all0139</i>  | 9,730   | 3,408    | -2,855 | unknown                                                         | unknown                                                                                 |
| <i>all4006</i>  | 8,210   | 2,876    | -2,855 | unknown                                                         | unknown                                                                                 |
| <i>asr3848</i>  | 2,848   | 0,000    | -2,848 | photosystem II protein J                                        | photosynthesis                                                                          |
| <i>asr7087</i>  | 2,848   | 0,000    | -2,848 | unknown                                                         | unknown                                                                                 |
| <i>all0664</i>  | 11,739  | 4,134    | -2,840 | WD-40 repeat protein                                            | regulatory functions                                                                    |
| <i>alr3352</i>  | 64,446  | 22,708   | -2,838 | probable rRNA methylase                                         | RNA synthesis and modification                                                          |
| <i>alr3705</i>  | 74,890  | 26,402   | -2,837 | probable sugar transporter                                      | transport across membrane                                                               |
| <i>all1729</i>  | 41,274  | 14,553   | -2,836 | unknown                                                         | unknown                                                                                 |
| <i>alr3265</i>  | 38,561  | 13,602   | -2,835 | glutamate-1-semialdehyde 2,1-aminomutase                        | tetrapyrrole biosynthesis pathway                                                       |
| <i>alr0221</i>  | 2,831   | 0,000    | -2,831 | phosphohistidine Phosphatase, SixA                              | regulatory functions                                                                    |
| <i>asl0846</i>  | 181,628 | 64,274   | -2,826 | photosystem II protein PsbH                                     | photosynthesis                                                                          |
| <i>asl4452</i>  | 176,040 | 62,296   | -2,826 | 50S ribosomal protein L33                                       | ribosome component                                                                      |
| <i>alr3230</i>  | 17,991  | 6,367    | -2,826 | 4-diphosphocytidyl-2C-methyl-D-erythritol kinase                | terpenoid biosynthesis                                                                  |
| <i>all4497</i>  | 23,236  | 8,241    | -2,819 | unknown                                                         | unknown                                                                                 |
| <i>all3180</i>  | 5,904   | 2,094    | -2,819 | similar to adenylate cyclase                                    | regulatory functions                                                                    |
| <i>alr0091</i>  | 19,220  | 6,817    | -2,819 | Na <sup>+</sup> /H <sup>+</sup> -exchanging protein             | transport across membrane                                                               |
| <i>alr2784</i>  | 19,715  | 7,003    | -2,815 | metal dependent phosphohydrolase                                | other enzymes                                                                           |
| <i>all3220</i>  | 13,020  | 4,635    | -2,809 | beta-lactamase domain-containing protein                        | resistance, adaptations to atypical conditions                                          |
| <i>all0592</i>  | 23,434  | 8,352    | -2,806 | ABC-1 domain protein                                            | protein amino acid phosphorylation                                                      |
| <i>asr3137</i>  | 478,298 | 170,752  | -2,801 | unknown                                                         | unknown                                                                                 |
| <i>all7026</i>  | 2,331   | 0,835    | -2,791 | Type III restriction enzyme, res subunit                        | DNA degradation and modification<br>aminoacyl tRNA synthetases and tRNA<br>modification |
| <i>alr1543</i>  | 2,780   | 0,000    | -2,780 | tRNA pseudouridine synthase B                                   | modification                                                                            |
| <i>asr4899</i>  | 2,780   | 0,000    | -2,780 | unknown                                                         | unknown                                                                                 |
| <i>alr2495</i>  | 9,707   | 3,498    | -2,775 | cysteine desulphurases, SufS                                    | Fe-S cluster biosynthesis                                                               |
| <i>asl7365</i>  | 44,908  | 16,181   | -2,775 | unknown                                                         | unknown                                                                                 |
| <i>alr1788</i>  | 8,108   | 2,922    | -2,775 | similar to zeta-carotene desaturase                             | carotenoids                                                                             |
| <i>all0687C</i> | 5,271   | 1,902    | -2,771 | [NiFe] uptake hydrogenase large subunit, Cend fragment (hupL3') | photosynthesis                                                                          |
| <i>asr3992</i>  | 266,882 | 96,411   | -2,768 | photosystem II reaction center protein PsbZ                     | photosynthesis                                                                          |
| <i>alr4157</i>  | 11,187  | 4,041    | -2,768 | NADH dehydrogenase subunit 4                                    | respiration, oxidative phosphorylation                                                  |
| <i>alr5154</i>  | 3762,6  | 1363,442 | -2,760 | photosystem I core protein A1                                   | photosynthesis                                                                          |
| <i>all3842</i>  | 456,429 | 165,804  | -2,753 | NADH dehydrogenase subunit 3                                    | respiration, oxidative phosphorylation                                                  |
| <i>all1989</i>  | 1,946   | 0,708    | -2,749 | single-strand-DNA-specific exonuclease; RecJ                    | DNA replication, recombination and repair                                               |
| <i>alr2392</i>  | 8,433   | 3,068    | -2,749 | filament integrity protein FraC                                 | filament integrity                                                                      |
| <i>all4945</i>  | 23,942  | 8,709    | -2,749 | unknown                                                         | unknown                                                                                 |

|                |         |        |        |                                                                                  |                                                                                          |
|----------------|---------|--------|--------|----------------------------------------------------------------------------------|------------------------------------------------------------------------------------------|
| <i>alr3379</i> | 6,459   | 2,350  | -2,749 | NLP/P60 protein                                                                  | cell wall/membrane biogenesis<br>degradation of proteins, peptides, and<br>glycopeptides |
| <i>all4090</i> | 4,048   | 1,472  | -2,749 | similar to carboxyl-terminal processing proteinase                               | lipid metabolism                                                                         |
| <i>all4427</i> | 4,865   | 1,770  | -2,749 | similar to phytanoyl-CoA hydroxylase                                             | nitrogen fixation                                                                        |
| <i>asr0773</i> | 15,811  | 5,752  | -2,749 | Mo-dependent nitrogenase-like                                                    | regulatory functions                                                                     |
| <i>all7310</i> | 1,941   | 0,706  | -2,749 | adenylate cyclase                                                                | regulatory functions                                                                     |
| <i>alr0068</i> | 16,410  | 5,969  | -2,749 | adenylate kinase<br>diguanylate cyclase/phosphodiesterase with<br>PAS/PAC sensor | regulatory functions                                                                     |
| <i>all0219</i> | 2,590   | 0,942  | -2,749 | FHA domain-containing protein                                                    | regulatory functions                                                                     |
| <i>all4083</i> | 4,649   | 1,691  | -2,749 | two-component hybrid sensor and regulator                                        | regulatory functions                                                                     |
| <i>all5308</i> | 3,466   | 1,261  | -2,749 | filamentous haemagglutinin-like protein                                          | surface components                                                                       |
| <i>alr0366</i> | 1,316   | 0,479  | -2,749 | penicillin-binding protein                                                       | surface components                                                                       |
| <i>alr0153</i> | 2,821   | 1,026  | -2,749 | unknown                                                                          | unknown                                                                                  |
| <i>all2702</i> | 23,967  | 8,719  | -2,749 | unknown                                                                          | unknown                                                                                  |
| <i>all4050</i> | 14,011  | 5,097  | -2,749 | unknown                                                                          | unknown                                                                                  |
| <i>all4663</i> | 11,499  | 4,183  | -2,749 | unknown                                                                          | unknown                                                                                  |
| <i>alr0436</i> | 6,445   | 2,345  | -2,749 | unknown                                                                          | unknown                                                                                  |
| <i>alr1114</i> | 6,000   | 2,182  | -2,749 | unknown                                                                          | unknown                                                                                  |
| <i>asr3250</i> | 21,684  | 7,888  | -2,749 | unknown                                                                          | unknown                                                                                  |
| <i>asr3831</i> | 28,639  | 10,418 | -2,749 | unknown                                                                          | unknown                                                                                  |
| <i>asr4154</i> | 48,964  | 17,812 | -2,749 | unknown                                                                          | unknown                                                                                  |
| <i>alr3573</i> | 2,747   | 0,000  | -2,747 | FO synthase subunit 1                                                            | coenzymes and cofactors                                                                  |
| <i>asr2932</i> | 2,747   | 0,000  | -2,747 | unknown                                                                          | unknown                                                                                  |
| <i>alr0165</i> | 49,006  | 17,913 | -2,736 | UvrD/REP helicase                                                                | DNA replication, recombination and repair                                                |
| <i>asl2329</i> | 96,156  | 35,187 | -2,733 | unknown                                                                          | unknown                                                                                  |
| <i>alr2393</i> | 10,183  | 3,745  | -2,719 | FraD                                                                             | filament integrity                                                                       |
| <i>alr2572</i> | 6,992   | 2,572  | -2,719 | two-component sensor histidine kinase                                            | regulatory functions                                                                     |
| <i>all3136</i> | 8,281   | 3,046  | -2,719 | polyA polymerase                                                                 | RNA synthesis and modification                                                           |
| <i>alr4030</i> | 12,037  | 4,427  | -2,719 | unknown                                                                          | unknown                                                                                  |
| <i>alr4393</i> | 82,461  | 30,368 | -2,715 | unknown                                                                          | unknown                                                                                  |
| <i>alr9029</i> | 2,715   | 0,000  | -2,715 | unknown                                                                          | unknown                                                                                  |
| <i>all2086</i> | 15,913  | 5,864  | -2,714 | unknown                                                                          | unknown                                                                                  |
| <i>alr3751</i> | 80,442  | 29,809 | -2,699 | ferrochelataase                                                                  | tetrapyrrole biosynthesis pathway                                                        |
| <i>alr7646</i> | 32,275  | 11,971 | -2,696 | MobB protein                                                                     | plasmid mobilization                                                                     |
| <i>alr3730</i> | 4,306   | 1,597  | -2,696 | unknown                                                                          | unknown                                                                                  |
| <i>all2315</i> | 17,936  | 6,653  | -2,696 | ketol-acid reductoisomerase                                                      | amino acids biosynthesis and metabolism                                                  |
| <i>all2564</i> | 4,161   | 1,543  | -2,696 | pyruvate kinase                                                                  | glycolysis                                                                               |
| <i>asl3117</i> | 224,234 | 83,662 | -2,680 | unknown                                                                          | unknown                                                                                  |
| <i>all1051</i> | 11,377  | 4,247  | -2,678 | glycerophosphoryl diester phosphodiesterase                                      | lipid metabolism                                                                         |
| <i>all2413</i> | 11,065  | 4,131  | -2,678 | unknown                                                                          | unknown                                                                                  |
| <i>all2971</i> | 41,858  | 15,628 | -2,678 | putative regulator                                                               | regulatory functions                                                                     |
| <i>alr7514</i> | 36,643  | 13,706 | -2,673 | unknown                                                                          | unknown                                                                                  |

|                |          |         |        |                                              |                                                                               |
|----------------|----------|---------|--------|----------------------------------------------|-------------------------------------------------------------------------------|
| <i>all1425</i> | 16,058   | 6,007   | -2,673 | unknown                                      | unknown                                                                       |
| <i>asr0064</i> | 354,717  | 132,801 | -2,671 | unknown                                      | unknown                                                                       |
| <i>alr3539</i> | 43,630   | 16,375  | -2,664 | unknown                                      | unknown                                                                       |
| <i>alr0130</i> | 20,779   | 7,799   | -2,664 | alpha/beta hydrolase fold protein            | other enzymes                                                                 |
| <i>all2563</i> | 22,090   | 8,291   | -2,664 | transaldolase; Tal                           | pentose phosphate pathway                                                     |
| <i>alr2208</i> | 7,385    | 2,772   | -2,664 | transcriptional regulator                    | regulatory functions                                                          |
| <i>all5122</i> | 20,433   | 7,669   | -2,664 | unknown                                      | unknown                                                                       |
| <i>alr3251</i> | 9,015    | 3,383   | -2,664 | unknown                                      | unknown                                                                       |
| <i>all1288</i> | 283,389  | 106,408 | -2,663 | GDSL family lipase                           | lipid metabolism                                                              |
| <i>asl4195</i> | 137,000  | 51,536  | -2,658 | translation initiation factor IF-1           | translation                                                                   |
| <i>all4023</i> | 38,023   | 14,321  | -2,655 | cytochrome D ubiquinol oxidase chain II      | nitrogen metabolism                                                           |
| <i>asr1828</i> | 2,654    | 0,000   | -2,654 | putative calcium-translocating P-type ATPase | transport across membrane                                                     |
| <i>asl2181</i> | 2,654    | 0,000   | -2,654 | unknown                                      | unknown                                                                       |
| <i>asl4204</i> | 45,517   | 17,158  | -2,653 | 50S ribosomal protein L24                    | ribosome component<br>degradation of proteins, peptides, and<br>glycopeptides |
| <i>all1939</i> | 5,690    | 2,153   | -2,643 | processing proteinase                        | glycopeptides                                                                 |
| <i>all7376</i> | 12,474   | 4,719   | -2,643 | transposase                                  | transposon-related functions                                                  |
| <i>alr1726</i> | 16,776   | 6,347   | -2,643 | transposase                                  | transposon-related functions                                                  |
| <i>all2608</i> | 8,740    | 3,306   | -2,643 | unknown                                      | unknown                                                                       |
| <i>all4916</i> | 10,953   | 4,144   | -2,643 | unknown                                      | unknown                                                                       |
| <i>all2655</i> | 1,789    | 0,677   | -2,643 | unknown                                      | unknown                                                                       |
| <i>all0384</i> | 2,637    | 0,000   | -2,637 | rhodanese domain-containing protein          | detoxification                                                                |
| <i>alr0622</i> | 23,011   | 8,733   | -2,635 | TPR repeat-containing protein                | unknown                                                                       |
| <i>alr3864</i> | 15,882   | 6,027   | -2,635 | unknown                                      | unknown                                                                       |
| <i>all2196</i> | 2,634    | 0,000   | -2,634 | PilT protein domain protein                  | chemotaxis and cell motility                                                  |
| <i>all3520</i> | 87,382   | 33,249  | -2,628 | cytochrome c biogenesis membrane protein     | posttranslational modifications                                               |
| <i>all4608</i> | 103,391  | 39,340  | -2,628 | glycine cleavage system protein H            | salvage pathways                                                              |
| <i>all2025</i> | 3,089    | 1,176   | -2,628 | similar to MrsD protein                      | polysaccharides and glycoproteins                                             |
| <i>asr1049</i> | 2,624    | 0,000   | -2,624 | unknown                                      | unknown                                                                       |
| <i>alr1297</i> | 11,189   | 4,267   | -2,622 | ABC transporter ATP binding protein          | transport across membrane                                                     |
| <i>alr1492</i> | 29,791   | 11,362  | -2,622 | unknown                                      | unknown                                                                       |
| <i>alr3301</i> | 13,860   | 5,297   | -2,617 | unknown                                      | unknown                                                                       |
| <i>alr0986</i> | 23,858   | 9,117   | -2,617 | unknown                                      | unknown                                                                       |
| <i>alr0235</i> | 85,147   | 32,559  | -2,615 | alpha/beta fold family hydrolase             | other enzymes                                                                 |
| <i>all2508</i> | 19,911   | 7,618   | -2,614 | GTP-binding elongation factor LepA           | translation                                                                   |
| <i>all2056</i> | 2,611    | 0,000   | -2,611 | alpha/beta fold family hydrolase             | other enzymes                                                                 |
| <i>alr3219</i> | 41,540   | 15,928  | -2,608 | unknown                                      | unknown                                                                       |
| <i>alr5155</i> | 1426,152 | 549,443 | -2,596 | photosystem I core protein A2                | photosynthesis                                                                |
| <i>alr2936</i> | 9,821    | 3,784   | -2,595 | pantothenate synthetase PanC                 | vitamin biosynthesis                                                          |
| <i>all4972</i> | 2,595    | 0,000   | -2,595 | transcriptional regulator, PadR family       | regulatory functions                                                          |
| <i>alr7515</i> | 2,595    | 0,000   | -2,595 | unknown                                      | unknown                                                                       |
| <i>all3275</i> | 19,285   | 7,445   | -2,590 | two-component hybrid sensor and regulator    | regulatory functions                                                          |

|                |         |        |        |                                                           |                                                      |
|----------------|---------|--------|--------|-----------------------------------------------------------|------------------------------------------------------|
| <i>all4212</i> | 19,866  | 7,669  | -2,590 | 50S ribosomal protein L2                                  | ribosome component                                   |
| <i>all3631</i> | 2,586   | 0,000  | -2,586 | type II site-specific deoxyribonuclease; AvaIR            | DNA degradation and modification                     |
| <i>all4736</i> | 33,450  | 12,934 | -2,586 | pyridoxamine 5'-phosphate oxidase-related, FMN-binding    | vitamin biosynthesis                                 |
| <i>all2906</i> | 18,216  | 7,061  | -2,580 | molybdopterin biosynthesis protein MoeB                   | coenzymes and cofactors                              |
| <i>asl0272</i> | 136,970 | 53,093 | -2,580 | unknown                                                   | unknown                                              |
| <i>all9023</i> | 15,087  | 5,860  | -2,575 | unknown                                                   | unknown                                              |
| <i>all2777</i> | 94,576  | 36,811 | -2,569 | RNA binding protein; RbpE                                 | nucleoproteins                                       |
| <i>asl1305</i> | 2,566   | 0,000  | -2,566 | unknown                                                   | unknown                                              |
| <i>alr1148</i> | 2,559   | 0,000  | -2,559 | unknown                                                   | unknown                                              |
| <i>all4428</i> | 2,551   | 0,000  | -2,551 | O-antigen polymerase                                      | cell wall/membrane biogenesis                        |
| <i>alr3930</i> | 2,549   | 0,000  | -2,549 | peptidoglycan binding domain-containing protein           | surface components                                   |
| <i>asr3846</i> | 2,538   | 0,000  | -2,538 | cytochrome b559 beta subunit                              | photosynthesis                                       |
| <i>all7165</i> | 2,538   | 0,000  | -2,538 | unknown                                                   | unknown                                              |
| <i>all0233</i> | 10,555  | 4,159  | -2,537 | methionyl-tRNA synthetase                                 | aminoacyl tRNA synthetases and tRNA modification     |
| <i>all1269</i> | 1,390   | 0,548  | -2,537 | tryptophanyl-tRNA synthetase; TrpS                        | aminoacyl tRNA synthetases and tRNA modification     |
| <i>alr1108</i> | 1,857   | 0,732  | -2,537 | 3-octaprenyl-4hydroxybenzoate decarboxylase               | coenzymes and cofactors                              |
| <i>all0961</i> | 2,245   | 0,885  | -2,537 | molybdopterin-guanine dinucleotide biosynthesis protein A | coenzymes and cofactors                              |
| <i>alr1270</i> | 5,893   | 2,322  | -2,537 | proline iminopeptidase                                    | degradation of proteins, peptides, and glycopeptides |
| <i>all1940</i> | 8,829   | 3,479  | -2,537 | protease                                                  | degradation of proteins, peptides, and glycopeptides |
| <i>alr0672</i> | 2,152   | 0,848  | -2,537 | similar to vanadium chloroperoxidase                      | detoxification                                       |
| <i>alr4512</i> | 8,609   | 3,393  | -2,537 | sulfide-quinone reductase                                 | detoxification                                       |
| <i>alr3451</i> | 2,004   | 0,790  | -2,537 | ATP-dependent helicase                                    | DNA replication, recombination and repair            |
| <i>all3284</i> | 3,243   | 1,278  | -2,537 | cytosine deaminase                                        | DNA replication, recombination and repair            |
| <i>alr7570</i> | 1,086   | 0,428  | -2,537 | DNA polymerase III gamma and tau subunits                 | DNA replication, recombination and repair            |
| <i>alr2323</i> | 4,961   | 1,955  | -2,537 | heat shock protein HtpG                                   | heat shock proteins and chaperones                   |
| <i>alr1245</i> | 7,836   | 3,088  | -2,537 | acetylglutamate kinase; ArgB                              | lipid metabolism                                     |
| <i>alr4798</i> | 19,800  | 7,803  | -2,537 | argininosuccinate synthase                                | nitrogen metabolism                                  |
| <i>alr0987</i> | 4,491   | 1,770  | -2,537 | nitrogen regulatory protein P-II (GlnB, GlnK)             | nitrogen metabolism                                  |
| <i>alr3248</i> | 3,073   | 1,211  | -2,537 | putative ammonia monooxygenase                            | nitrogen metabolism                                  |
| <i>all1235</i> | 1,996   | 0,787  | -2,537 | probable amidase                                          | other enzymes                                        |
| <i>alr4542</i> | 7,656   | 3,017  | -2,537 | probable methyltransferase                                | other enzymes                                        |
| <i>alr1362</i> | 4,899   | 1,931  | -2,537 | putative carboxymethylenebutenolidase                     | other enzymes                                        |
| <i>all2561</i> | 1,150   | 0,453  | -2,537 | acetate kinase; AckA                                      | pyruvate and acetyl-CoA metabolism                   |
| <i>asl7641</i> | 5,560   | 2,191  | -2,537 | thioredoxin                                               | redox homeostasis                                    |
| <i>alr3655</i> | 9,341   | 3,681  | -2,537 | photomixotrophic growth related protein, PmgA homolog     | regulatory functions                                 |

|                |        |       |        |                                                                               |                                       |
|----------------|--------|-------|--------|-------------------------------------------------------------------------------|---------------------------------------|
| <i>all0192</i> | 0,843  | 0,332 | -2,537 | serine/threonine kinase                                                       | regulatory functions                  |
| <i>all3773</i> | 0,660  | 0,260 | -2,537 | serine/threonine kinase                                                       | regulatory functions                  |
| <i>all2035</i> | 4,969  | 1,958 | -2,537 | transcriptional regulator                                                     | regulatory functions                  |
| <i>all3743</i> | 3,860  | 1,521 | -2,537 | transcriptional regulator                                                     | regulatory functions                  |
| <i>all4925</i> | 1,370  | 0,540 | -2,537 | transcriptional regulator                                                     | regulatory functions                  |
| <i>all1178</i> | 0,506  | 0,199 | -2,537 | two-component hybrid sensor and regulator                                     | regulatory functions                  |
| <i>all3759</i> | 1,176  | 0,464 | -2,537 | two-component response regulator                                              | regulatory functions                  |
| <i>alr3037</i> | 2,353  | 0,927 | -2,537 | two-component sensor histidine kinase                                         | regulatory functions                  |
| <i>all2352</i> | 11,741 | 4,627 | -2,537 | WD-40 repeat protein                                                          | regulatory functions                  |
| <i>all2238</i> | 3,876  | 1,527 | -2,537 | serine/threonine protein kinase                                               | regulatory functions                  |
| <i>all4080</i> | 1,698  | 0,669 | -2,537 | ribosomal large chain pseudouridine synthase A                                | RNA synthesis and modification        |
| <i>all5194</i> | 1,207  | 0,476 | -2,537 | glycosyl transferase                                                          | sugars                                |
| <i>alr0819</i> | 5,790  | 2,282 | -2,537 | putative invertase                                                            | sugars                                |
| <i>alr3576</i> | 1,433  | 0,565 | -2,537 | adhesin precursor                                                             | surface components                    |
| <i>all4345</i> | 1,526  | 0,601 | -2,537 | polysaccharide deacetylase                                                    | surface components                    |
| <i>alr0058</i> | 1,366  | 0,538 | -2,537 | D-lactate dehydrogenase                                                       | TCA cycle                             |
| <i>all5282</i> | 5,077  | 2,001 | -2,537 | ABC transporter sugar permease                                                | transport across membrane             |
| <i>alr4068</i> | 3,844  | 1,515 | -2,537 | ABC transporter, ATP-binding protein                                          | transport across membrane             |
| <i>all2147</i> | 3,871  | 1,525 | -2,537 | ABC transporter, ferrichrome binding protein                                  | transport across membrane             |
| <i>all3334</i> | 3,538  | 1,394 | -2,537 | ABC transporter, nitrate transport ATP-binding protein NrtC                   | transport across membrane             |
| <i>alr0299</i> | 1,201  | 0,473 | -2,537 | ABC transporter, periplasmic polyamine-binding protein                        | transport across membrane             |
| <i>all2158</i> | 0,531  | 0,209 | -2,537 | ferrichrome-iron receptor                                                     | transport across membrane             |
| <i>alr0656</i> | 5,240  | 2,065 | -2,537 | Na <sup>+</sup> /H <sup>+</sup> antiporter                                    | transport across membrane             |
| <i>all2357</i> | 3,813  | 1,503 | -2,537 | phosphonate ABC transport ATP-binding component                               | transport across membrane             |
| <i>alr2835</i> | 0,768  | 0,303 | -2,537 | ABC transporter, ATP-binding protein; heterocyst differentiation protein HepA | transport across membrane, heterocyst |
| <i>all5014</i> | 1,650  | 0,650 | -2,537 | RNA-directed DNA polymerase (Reverse transcriptase)                           | transposon-related functions          |
| <i>all1971</i> | 2,731  | 1,076 | -2,537 | transposase                                                                   | transposon-related functions          |
| <i>all4867</i> | 2,731  | 1,076 | -2,537 | transposase                                                                   | transposon-related functions          |
| <i>all7303</i> | 7,984  | 3,146 | -2,537 | transposase                                                                   | transposon-related functions          |
| <i>all4647</i> | 3,336  | 1,315 | -2,537 | beta-Ig-H3/fasciclin                                                          | unknown                               |
| <i>all0134</i> | 2,407  | 0,949 | -2,537 | unknown                                                                       | unknown                               |
| <i>all0307</i> | 4,061  | 1,600 | -2,537 | unknown                                                                       | unknown                               |
| <i>all0711</i> | 0,729  | 0,287 | -2,537 | unknown                                                                       | unknown                               |
| <i>all1287</i> | 23,159 | 9,127 | -2,537 | unknown                                                                       | unknown                               |
| <i>all1479</i> | 0,592  | 0,233 | -2,537 | unknown                                                                       | unknown                               |
| <i>all2871</i> | 2,289  | 0,902 | -2,537 | unknown                                                                       | unknown                               |
| <i>all2909</i> | 6,802  | 2,680 | -2,537 | unknown                                                                       | unknown                               |

|                |        |        |        |                                                |                                                      |
|----------------|--------|--------|--------|------------------------------------------------|------------------------------------------------------|
| <i>all3049</i> | 14,371 | 5,663  | -2,537 | unknown                                        | unknown                                              |
| <i>all3209</i> | 3,774  | 1,487  | -2,537 | unknown                                        | unknown                                              |
| <i>all3613</i> | 0,720  | 0,284  | -2,537 | unknown                                        | unknown                                              |
| <i>all3675</i> | 2,445  | 0,964  | -2,537 | unknown                                        | unknown                                              |
| <i>all4117</i> | 55,546 | 21,890 | -2,537 | unknown                                        | unknown                                              |
| <i>all4218</i> | 3,053  | 1,203  | -2,537 | unknown                                        | unknown                                              |
| <i>all4381</i> | 2,525  | 0,995  | -2,537 | unknown                                        | unknown                                              |
| <i>all5082</i> | 4,469  | 1,761  | -2,537 | unknown                                        | unknown                                              |
| <i>all5342</i> | 1,139  | 0,449  | -2,537 | unknown                                        | unknown                                              |
| <i>all7625</i> | 2,379  | 0,937  | -2,537 | unknown                                        | unknown                                              |
| <i>alr1242</i> | 2,104  | 0,829  | -2,537 | unknown                                        | unknown                                              |
| <i>alr1785</i> | 2,278  | 0,898  | -2,537 | unknown                                        | unknown                                              |
| <i>alr2562</i> | 3,384  | 1,334  | -2,537 | unknown                                        | unknown                                              |
| <i>alr2574</i> | 1,594  | 0,628  | -2,537 | unknown                                        | unknown                                              |
| <i>alr3077</i> | 2,245  | 0,885  | -2,537 | unknown                                        | unknown                                              |
| <i>alr3106</i> | 3,892  | 1,534  | -2,537 | unknown                                        | unknown                                              |
| <i>alr3495</i> | 1,668  | 0,657  | -2,537 | unknown                                        | unknown                                              |
| <i>alr4275</i> | 3,860  | 1,521  | -2,537 | unknown                                        | unknown                                              |
| <i>alr4532</i> | 18,259 | 7,196  | -2,537 | unknown                                        | unknown                                              |
| <i>alr4938</i> | 30,727 | 12,109 | -2,537 | unknown                                        | unknown                                              |
| <i>alr8557</i> | 3,434  | 1,353  | -2,537 | unknown                                        | unknown                                              |
| <i>asl5079</i> | 4,718  | 1,859  | -2,537 | unknown                                        | unknown                                              |
| <i>asr1486</i> | 7,656  | 3,017  | -2,537 | unknown                                        | unknown                                              |
| <i>asr4108</i> | 7,784  | 3,068  | -2,537 | unknown                                        | unknown                                              |
| <i>asr5004</i> | 6,578  | 2,592  | -2,537 | unknown                                        | unknown                                              |
| <i>asr7657</i> | 6,145  | 2,422  | -2,537 | unknown                                        | unknown                                              |
| <i>all2109</i> | 4,513  | 1,778  | -2,537 | von Willebrand factor, type A                  | unknown                                              |
| <i>all0395</i> | 0,867  | 0,341  | -2,537 | L-2,4-diaminobutyrate decarboxylase            | amine and polyamine biosynthesis                     |
| <i>all1354</i> | 1,294  | 0,510  | -2,537 | FAD dependent oxidoreductase                   | amino acids biosynthesis and metabolism              |
| <i>all3432</i> | 1,803  | 0,711  | -2,537 | undecaprenyl pyrophosphate synthetase          | carotenoids                                          |
| <i>all5305</i> | 1,599  | 0,630  | -2,537 | 3-beta hydroxysteroid dehydrogenase/isomerase  | cell wall/membrane biogenesis                        |
| <i>all1069</i> | 1,270  | 0,501  | -2,537 | methyl-accepting chemotaxis protein            | chemotaxis and cell motility                         |
| <i>alr3448</i> | 1,464  | 0,577  | -2,537 | tocopherol phytyltransferase                   | coenzymes and cofactors                              |
| <i>alr1779</i> | 4,195  | 1,653  | -2,537 | similar to cyanophycin synthetase              | cyanophycin biosynthesis                             |
| <i>all4358</i> | 2,113  | 0,833  | -2,537 | ATP-dependent Clp protease proteolytic subunit | degradation of proteins, peptides, and glycopeptides |
| <i>all7071</i> | 0,624  | 0,246  | -2,537 | exodeoxyribonuclease V, alpha chain            | DNA replication, recombination and repair            |
| <i>alr2445</i> | 45,016 | 17,740 | -2,537 | heat shock protein GrpE                        | heat shock proteins and chaperones                   |
| <i>alr9027</i> | 3,033  | 1,195  | -2,537 | chromosome partitioning protein, ParB family   | nucleoproteins                                       |
| <i>alr3102</i> | 2,595  | 1,023  | -2,537 | HAD-superfamily hydrolase subfamily IIIA       | other enzymes                                        |
| <i>alr0694</i> | 1,783  | 0,703  | -2,537 | hydrogenase maturation protein HypF            | other enzymes                                        |
| <i>asr1283</i> | 10,379 | 4,090  | -2,537 | photosystem I 4.8K protein PsaX                | photosynthesis                                       |

|                |        |       |        |                                                          |                                                |
|----------------|--------|-------|--------|----------------------------------------------------------|------------------------------------------------|
| <i>alr4592</i> | 2,588  | 1,020 | -2,537 | photosystem II protein D1                                | photosynthesis                                 |
| <i>asr8504</i> | 15,066 | 5,937 | -2,537 | phycobilisome degradation protein NblA                   | phycobilisomes and phycobiliproteins           |
| <i>alr1336</i> | 2,271  | 0,895 | -2,537 | serine/threonine kinase                                  | regulatory functions                           |
| <i>alr2682</i> | 0,480  | 0,189 | -2,537 | serine/threonine kinase with two-component sensor domain | regulatory functions                           |
| <i>alr0803</i> | 3,274  | 1,290 | -2,537 | signal transduction histidine kinase, LytS               | regulatory functions                           |
| <i>all4279</i> | 1,578  | 0,622 | -2,537 | transcriptional regulator                                | regulatory functions                           |
| <i>alr1044</i> | 2,371  | 0,934 | -2,537 | transcriptional regulator                                | regulatory functions                           |
| <i>all2239</i> | 2,734  | 1,078 | -2,537 | two-component hybrid sensor and regulator                | regulatory functions                           |
| <i>alr3547</i> | 1,018  | 0,401 | -2,537 | two-component sensor histidine kinase                    | regulatory functions                           |
| <i>all1964</i> | 1,971  | 0,777 | -2,537 | two-component system response regulator                  | regulatory functions                           |
| <i>alr4908</i> | 6,936  | 2,734 | -2,537 | SOS function regulatory protein, LexA repressor          | resistance, adaptations to atypical conditions |
| <i>all1864</i> | 1,868  | 0,736 | -2,537 | similar to NADH dehydrogenase                            | respiration, oxidative phosphorylation         |
| <i>all4336</i> | 8,812  | 3,473 | -2,537 | 30S ribosomal protein S10                                | ribosome component                             |
| <i>alr1050</i> | 6,180  | 2,436 | -2,537 | glucose-6-phosphate isomerase                            | sugars                                         |
| <i>all0601</i> | 2,616  | 1,031 | -2,537 | glycosyl transferase                                     | sugars                                         |
| <i>alr4347</i> | 2,715  | 1,070 | -2,537 | glycosyl transferase                                     | sugars                                         |
| <i>all0915</i> | 7,733  | 3,047 | -2,537 | probable glycosyl transferase                            | sugars                                         |
| <i>alr1668</i> | 1,091  | 0,430 | -2,537 | putative glycosyl transferase                            | sugars                                         |
| <i>alr1384</i> | 1,290  | 0,508 | -2,537 | ABC transporter ATP-binding protein                      | transport across membrane                      |
| <i>all1948</i> | 1,891  | 0,745 | -2,537 | ABC transporter, ATP-binding protein                     | transport across membrane                      |
| <i>all2148</i> | 1,081  | 0,426 | -2,537 | ferrichrome-iron receptor                                | transport across membrane                      |
| <i>all4285</i> | 3,941  | 1,553 | -2,537 | folate/biopterin transporter                             | transport across membrane                      |
| <i>all2585</i> | 1,346  | 0,530 | -2,537 | iron(III) dicitrate transport system permease protein    | transport across membrane                      |
| <i>alr0738</i> | 1,511  | 0,596 | -2,537 | sugar ABC transporter, permease protein                  | transport across membrane                      |
| <i>all4768</i> | 5,431  | 2,140 | -2,537 | ErfK/YbiS/YcfS/YnhG family protein                       | unknown                                        |
| <i>all4662</i> | 22,783 | 8,978 | -2,537 | nucleotide-binding protein                               | unknown                                        |
| <i>all4659</i> | 15,765 | 6,213 | -2,537 | TPR repeat-containing protein                            | unknown                                        |
| <i>all0406</i> | 1,109  | 0,437 | -2,537 | unknown                                                  | unknown                                        |
| <i>all0466</i> | 1,705  | 0,672 | -2,537 | unknown                                                  | unknown                                        |
| <i>all0768</i> | 3,156  | 1,244 | -2,537 | unknown                                                  | unknown                                        |
| <i>all0861</i> | 4,277  | 1,686 | -2,537 | unknown                                                  | unknown                                        |
| <i>all1003</i> | 3,512  | 1,384 | -2,537 | unknown                                                  | unknown                                        |
| <i>all2703</i> | 6,894  | 2,717 | -2,537 | unknown                                                  | unknown                                        |
| <i>all2756</i> | 3,485  | 1,374 | -2,537 | unknown                                                  | unknown                                        |
| <i>all3034</i> | 3,975  | 1,566 | -2,537 | unknown                                                  | unknown                                        |
| <i>all3110</i> | 1,730  | 0,682 | -2,537 | unknown                                                  | unknown                                        |
| <i>all3433</i> | 3,003  | 1,184 | -2,537 | unknown                                                  | unknown                                        |
| <i>all3615</i> | 0,751  | 0,296 | -2,537 | unknown                                                  | unknown                                        |
| <i>all4295</i> | 8,703  | 3,430 | -2,537 | unknown                                                  | unknown                                        |
| <i>all4407</i> | 3,649  | 1,438 | -2,537 | unknown                                                  | unknown                                        |

|                |         |         |        |                                                 |                                                |
|----------------|---------|---------|--------|-------------------------------------------------|------------------------------------------------|
| <i>all7265</i> | 14,710  | 5,797   | -2,537 | unknown                                         | unknown                                        |
| <i>alr0053</i> | 2,580   | 1,017   | -2,537 | unknown                                         | unknown                                        |
| <i>alr0501</i> | 3,409   | 1,343   | -2,537 | unknown                                         | unknown                                        |
| <i>alr0901</i> | 1,639   | 0,646   | -2,537 | unknown                                         | unknown                                        |
| <i>alr1085</i> | 1,824   | 0,719   | -2,537 | unknown                                         | unknown                                        |
| <i>alr2141</i> | 1,424   | 0,561   | -2,537 | unknown                                         | unknown                                        |
| <i>alr2471</i> | 3,199   | 1,261   | -2,537 | unknown                                         | unknown                                        |
| <i>alr3825</i> | 1,567   | 0,618   | -2,537 | unknown                                         | unknown                                        |
| <i>alr5087</i> | 14,945  | 5,890   | -2,537 | unknown                                         | unknown                                        |
| <i>alr5225</i> | 1,109   | 0,437   | -2,537 | unknown                                         | unknown                                        |
| <i>alr5239</i> | 2,395   | 0,944   | -2,537 | unknown                                         | unknown                                        |
| <i>alr7300</i> | 1,730   | 0,682   | -2,537 | unknown                                         | unknown                                        |
| <i>alr7311</i> | 6,919   | 2,727   | -2,537 | unknown                                         | unknown                                        |
| <i>alr7341</i> | 1,541   | 0,607   | -2,537 | unknown                                         | unknown                                        |
| <i>asr1857</i> | 12,131  | 4,781   | -2,537 | unknown                                         | unknown                                        |
| <i>asr3478</i> | 5,189   | 2,045   | -2,537 | unknown                                         | unknown                                        |
| <i>alr3381</i> | 2,525   | 0,000   | -2,525 | putative antibiotic efflux protein              | resistance, adaptations to atypical conditions |
| <i>all1783</i> | 101,154 | 40,092  | -2,523 | unknown                                         | unknown                                        |
| <i>all7589</i> | 2,516   | 0,000   | -2,516 | unknown                                         | unknown                                        |
|                |         |         |        | phosphoribosylformylglycinamide synthase        |                                                |
| <i>asr2474</i> | 2,511   | 0,000   | -2,511 | subunit PurS                                    | purine/pyrimidine biosynthesis and metabolism  |
| <i>asr0905</i> | 2,511   | 0,000   | -2,511 | unknown                                         | unknown                                        |
| <i>all7623</i> | 2,506   | 0,000   | -2,506 | phosphoesterase, PA-phosphatase related protein | other enzymes                                  |
| <i>all1947</i> | 2,506   | 0,000   | -2,506 | ABC transporter, ATP-binding protein            | transport across membrane                      |
| <i>all0012</i> | 36,780  | 14,725  | -2,498 | methyltransferase type 11                       | other enzymes                                  |
| <i>alr2313</i> | 27,044  | 10,827  | -2,498 | unknown                                         | unknown                                        |
| <i>all7122</i> | 2,495   | 0,000   | -2,495 | probable transporter                            | transport across membrane                      |
| <i>all4338</i> | 123,163 | 49,401  | -2,493 | translation elongation factor EF-G              | translation                                    |
| <i>all3969</i> | 122,541 | 49,203  | -2,491 | 30S ribosomal protein S14                       | ribosome component                             |
| <i>all4396</i> | 38,812  | 15,615  | -2,485 | polyribonucleotide nucleotidyltransferase       | RNA synthesis and modification                 |
| <i>alr2554</i> | 13,255  | 5,335   | -2,485 | unknown                                         | unknown                                        |
| <i>asl3253</i> | 2,484   | 0,000   | -2,484 | RNA-binding S4 domain-containing protein        | nucleoproteins                                 |
| <i>alr4271</i> | 20,164  | 8,131   | -2,480 | unknown                                         | unknown                                        |
| <i>all1717</i> | 7,405   | 2,986   | -2,480 | DNA ligase                                      | DNA replication, recombination and repair      |
| <i>alr4488</i> | 12,738  | 5,148   | -2,474 | glycosyl transferase                            | sugars                                         |
| <i>all0122</i> | 35,954  | 14,590  | -2,464 | pyruvate dehydrogenase E1 beta subunit          | pyruvate and acetyl-CoA metabolism             |
| <i>all4450</i> | 349,773 | 142,263 | -2,459 | ribonuclease II                                 | RNA degradation                                |
|                |         |         |        |                                                 | aminoacyl tRNA synthetases and tRNA            |
| <i>alr2418</i> | 4,109   | 1,671   | -2,458 | alanyl-tRNA synthetase                          | modification                                   |
| <i>alr4359</i> | 8,639   | 3,514   | -2,458 | von Willebrand factor, type A                   | unknown                                        |
| <i>asr4471</i> | 2,458   | 0,000   | -2,458 | plasmid stabilization system                    | plasmid mobilization                           |
| <i>all2416</i> | 2,454   | 0,000   | -2,454 | putative diguanylate cyclase                    | regulatory functions                           |



|                |         |         |        |                                                                       |                                                                                     |
|----------------|---------|---------|--------|-----------------------------------------------------------------------|-------------------------------------------------------------------------------------|
| <i>alr5303</i> | 24,065  | 9,835   | -2,447 | 50S ribosomal protein L12                                             | ribosome component                                                                  |
| <i>alr4893</i> | 4,657   | 1,903   | -2,447 | surface antigen (D15)                                                 | surface components                                                                  |
| <i>all2997</i> | 6,780   | 2,771   | -2,447 | diaminopimelate decarboxylase                                         | amino acids biosynthesis and metabolism                                             |
| <i>alr3954</i> | 13,191  | 5,391   | -2,447 | NnrU family protein                                                   | unknown<br>degradation of proteins, peptides, and<br>glycopeptides                  |
| <i>alr2975</i> | 2,445   | 0,000   | -2,445 | signal peptidase I                                                    | glycopeptides                                                                       |
| <i>all3503</i> | 38,625  | 15,803  | -2,444 | probable integrase                                                    | transposon-related functions                                                        |
| <i>all0118</i> | 91,475  | 37,515  | -2,438 | GCN5-related N-acetyltransferase                                      | other enzymes                                                                       |
| <i>alr1535</i> | 2,433   | 0,000   | -2,433 | unknown                                                               | unknown                                                                             |
| <i>asr4227</i> | 2,433   | 0,000   | -2,433 | unknown                                                               | unknown                                                                             |
| <i>alr0900</i> | 1,491   | 0,613   | -2,432 | serine/threonine kinase with two-component<br>sensor domain           | regulatory functions                                                                |
| <i>all1750</i> | 7,586   | 3,120   | -2,432 | similar to WD-repeat containing protein                               | involved in different biological functions                                          |
| <i>alr3692</i> | 669,020 | 275,117 | -2,432 | MscS Mechanosensitive ion channel                                     | transport across membrane                                                           |
| <i>alr4642</i> | 12,549  | 5,160   | -2,432 | putative thiol-specific antioxidant protein                           | detoxification                                                                      |
| <i>alr3055</i> | 4,762   | 1,958   | -2,432 | DNA mismatch repair protein MutL                                      | DNA replication, recombination and repair                                           |
| <i>all0769</i> | 2,929   | 1,204   | -2,432 | acetyl-CoA synthetase                                                 | pyruvate and acetyl-CoA metabolism                                                  |
| <i>all5119</i> | 12,152  | 4,997   | -2,432 | integral membrane protein, DedA family                                | unknown                                                                             |
| <i>all5020</i> | 14,595  | 6,002   | -2,432 | unknown                                                               | unknown                                                                             |
| <i>alr2440</i> | 13,245  | 5,494   | -2,411 | unknown                                                               | unknown                                                                             |
| <i>alr0354</i> | 20,377  | 8,464   | -2,408 | serine/threonine kinase with two-component<br>sensor domain           | regulatory functions                                                                |
| <i>asr4600</i> | 2,407   | 0,000   | -2,407 | unknown                                                               | unknown<br>degradation of proteins, peptides, and<br>glycopeptides                  |
| <i>alr0880</i> | 14,450  | 6,022   | -2,400 | oligopeptidase A                                                      | glycopeptides                                                                       |
| <i>all2422</i> | 197,255 | 82,268  | -2,398 | unknown                                                               | unknown                                                                             |
| <i>all0070</i> | 14,649  | 6,113   | -2,397 | superoxide dismutase                                                  | detoxification                                                                      |
| <i>asl2061</i> | 42,687  | 17,812  | -2,397 | unknown                                                               | unknown                                                                             |
| <i>all1035</i> | 2,383   | 0,000   | -2,383 | transcriptional regulator                                             | regulatory functions                                                                |
| <i>all4816</i> | 2,383   | 0,000   | -2,383 | transposase                                                           | transposon-related functions                                                        |
| <i>all3502</i> | 2,383   | 0,000   | -2,383 | unknown                                                               | unknown                                                                             |
| <i>alr9025</i> | 2,383   | 0,000   | -2,383 | unknown                                                               | unknown                                                                             |
| <i>all4499</i> | 39,276  | 16,488  | -2,382 | S-layer region-like protein                                           | surface components                                                                  |
| <i>alr0030</i> | 2,963   | 1,246   | -2,379 | similar to Mg-protoporphyrin IX monomethyl<br>ester oxidative cyclase | chlorophyll biosynthesis<br>degradation of proteins, peptides, and<br>glycopeptides |
| <i>alr1963</i> | 25,788  | 10,840  | -2,379 | endopeptidase Clp ATP-binding chain                                   | glycopeptides                                                                       |
| <i>all3033</i> | 3,791   | 1,594   | -2,379 | arsenical pump membrane protein                                       | detoxification                                                                      |
| <i>alr0094</i> | 5,978   | 2,513   | -2,379 | glutamate racemase                                                    | nitrogen metabolism                                                                 |
| <i>all4520</i> | 4,457   | 1,873   | -2,379 | anhydro-N-acetylmuramic acid kinase                                   | peptidoglycan recycling                                                             |
| <i>all1279</i> | 3,510   | 1,475   | -2,379 | two-component hybrid sensor and regulator                             | regulatory functions                                                                |
| <i>all1011</i> | 45,373  | 19,073  | -2,379 | maltose transacetylase                                                | sugars                                                                              |

|                |         |         |        |                                                          |                                                                               |
|----------------|---------|---------|--------|----------------------------------------------------------|-------------------------------------------------------------------------------|
| <i>all1708</i> | 8,714   | 3,663   | -2,379 | unknown                                                  | unknown                                                                       |
| <i>all1755</i> | 13,169  | 5,536   | -2,379 | unknown                                                  | unknown                                                                       |
| <i>all1974</i> | 2,895   | 1,217   | -2,379 | unknown                                                  | unknown                                                                       |
| <i>all3604</i> | 9,519   | 4,001   | -2,379 | unknown                                                  | unknown                                                                       |
| <i>all7686</i> | 8,890   | 3,737   | -2,379 | unknown                                                  | unknown                                                                       |
| <i>alr2321</i> | 11,996  | 5,043   | -2,379 | lactoylglutathione lyase                                 | detoxification                                                                |
| <i>all1988</i> | 20,131  | 8,462   | -2,379 | cyclopropane-fatty-acyl-phospholipid synthase            | lipid metabolism                                                              |
| <i>all4355</i> | 8,420   | 3,540   | -2,379 | similar to DnaJ protein                                  | resistance, adaptations to atypical conditions                                |
| <i>alr4755</i> | 4,825   | 2,028   | -2,379 | pyridoxal phosphate biosynthetic protein PdxA            | vitamin biosynthesis                                                          |
| <i>alr1080</i> | 60,290  | 25,372  | -2,376 | N-acetylornithine aminotransferase; ArgD                 | nitrogen metabolism                                                           |
| <i>alr4548</i> | 63,356  | 26,667  | -2,376 | photosystem II protein D2                                | photosynthesis                                                                |
| <i>all0209</i> | 85,229  | 35,926  | -2,372 | unknown                                                  | unknown                                                                       |
| <i>alr3732</i> | 8,428   | 3,564   | -2,364 | protein serine-threonine kinase; PknE                    | regulatory functions                                                          |
| <i>all4214</i> | 37,076  | 15,702  | -2,361 | 50S ribosomal protein L4                                 | ribosome component<br>degradation of proteins, peptides, and<br>glycopeptides |
| <i>all4357</i> | 55,584  | 23,558  | -2,359 | ATP-dependent Clp protease proteolytic subunit           | glycopeptides                                                                 |
| <i>alr7526</i> | 2,359   | 0,000   | -2,359 | transcriptional regulator                                | regulatory functions                                                          |
| <i>asl5277</i> | 2,359   | 0,000   | -2,359 | HicA protein                                             | resistance, adaptations to atypical conditions                                |
| <i>asl3164</i> | 2,359   | 0,000   | -2,359 | pentapeptide repeat containing protein                   | unknown                                                                       |
| <i>asl2052</i> | 2,359   | 0,000   | -2,359 | unknown                                                  | unknown                                                                       |
| <i>all3521</i> | 264,520 | 112,389 | -2,354 | probable hydrogenase component                           | other enzymes                                                                 |
| <i>alr1700</i> | 104,398 | 44,390  | -2,352 | unknown                                                  | unknown                                                                       |
| <i>alr5065</i> | 29,721  | 12,642  | -2,351 | UDP-N-acetylmuramoylalanine--D-glutamate<br>ligase       | cell envelope                                                                 |
| <i>alr5208</i> | 67,492  | 28,726  | -2,350 | unknown                                                  | unknown                                                                       |
| <i>asr1102</i> | 66,464  | 28,317  | -2,347 | arsenical-resistance protein ACR3, efflux<br>transporter | detoxification                                                                |
| <i>all2425</i> | 26,910  | 11,504  | -2,339 | unknown                                                  | unknown                                                                       |
| <i>all2637</i> | 2,335   | 0,000   | -2,335 | unknown                                                  | unknown                                                                       |
| <i>alr4890</i> | 2,939   | 1,264   | -2,326 | peptidase U62, modulator of DNA gyrase                   | degradation of proteins, peptides, and<br>glycopeptides                       |
| <i>alr3331</i> | 1,776   | 0,764   | -2,326 | ATP-dependent helicase                                   | DNA replication, recombination and repair                                     |
| <i>all0332</i> | 10,442  | 4,489   | -2,326 | polymorphic membrane protein                             | membrane component                                                            |
| <i>all7377</i> | 2,001   | 0,860   | -2,326 | probable acid phosphatase                                | other enzymes                                                                 |
| <i>all4020</i> | 3,362   | 1,445   | -2,326 | transaldolase                                            | pentose phosphate pathway                                                     |
| <i>alr1883</i> | 2,150   | 0,924   | -2,326 | two-component hybrid sensor and regulator                | regulatory functions                                                          |
| <i>all1280</i> | 1,363   | 0,586   | -2,326 | two-component sensor histidine kinase                    | regulatory functions                                                          |
| <i>alr0169</i> | 3,995   | 1,717   | -2,326 | cyclomaltodextrin glucanotransferase                     | sugars                                                                        |
| <i>all3633</i> | 3,701   | 1,591   | -2,326 | glucanase                                                | sugars                                                                        |
| <i>all0143</i> | 6,536   | 2,810   | -2,326 | glycosyl transferase                                     | sugars                                                                        |
| <i>all4830</i> | 6,760   | 2,906   | -2,326 | mannosyl transferase                                     | sugars                                                                        |
| <i>alr0782</i> | 38,096  | 16,378  | -2,326 | ribulose-phosphate 3-epimerase                           | sugars                                                                        |

|                |         |         |        |                                              |                                                      |
|----------------|---------|---------|--------|----------------------------------------------|------------------------------------------------------|
| <i>all1413</i> | 2,392   | 1,028   | -2,326 | MscS mechanosensitive ion channel            | transport across membrane                            |
| <i>all8545</i> | 3,778   | 1,624   | -2,326 | integrase-recombinase protein                | transposon-related functions                         |
| <i>alr1858</i> | 21,406  | 9,203   | -2,326 | transposase                                  | transposon-related functions                         |
| <i>all0796</i> | 4,281   | 1,841   | -2,326 | unknown                                      | unknown                                              |
| <i>all1339</i> | 4,491   | 1,931   | -2,326 | unknown                                      | unknown                                              |
| <i>all7227</i> | 1,061   | 0,456   | -2,326 | unknown                                      | unknown                                              |
| <i>alr1546</i> | 7,511   | 3,229   | -2,326 | unknown                                      | unknown                                              |
| <i>alr2980</i> | 11,892  | 5,113   | -2,326 | unknown                                      | unknown                                              |
| <i>alr3411</i> | 26,898  | 11,564  | -2,326 | unknown                                      | unknown                                              |
| <i>alr7075</i> | 18,614  | 8,002   | -2,326 | unknown                                      | unknown                                              |
| <i>alr7532</i> | 1,362   | 0,586   | -2,326 | unknown                                      | unknown                                              |
| <i>alr4957</i> | 73,829  | 31,787  | -2,323 | PilT domain-containing protein               | chemotaxis and cell motility                         |
| <i>alr1310</i> | 7,993   | 3,459   | -2,311 | glycoside hydrolase, family 57               | sugars                                               |
| <i>alr3855</i> | 40,235  | 17,411  | -2,311 | unknown                                      | unknown                                              |
| <i>all4116</i> | 19,874  | 8,615   | -2,307 | peptidase M15D, vanX D-ala-D-ala dipeptidase | degradation of proteins, peptides, and glycopeptides |
| <i>alr0502</i> | 2,304   | 0,000   | -2,304 | unknown                                      | unknown                                              |
| <i>alr4061</i> | 262,898 | 114,303 | -2,300 | unknown                                      | unknown                                              |
| <i>all1844</i> | 17,364  | 7,551   | -2,300 | peptidase M50                                | degradation of proteins, peptides, and glycopeptides |
| <i>alr2404</i> | 10,784  | 4,689   | -2,300 | unknown                                      | unknown                                              |
| <i>all0328</i> | 118,148 | 51,390  | -2,299 | anthranilate synthetase alpha-subunit        | anthranilate biosynthesis                            |
| <i>all4315</i> | 37,587  | 16,389  | -2,294 | unknown                                      | unknown                                              |
| <i>alr2359</i> | 40,351  | 17,594  | -2,294 | unknown                                      | unknown                                              |
| <i>all0794</i> | 7,713   | 3,377   | -2,284 | radical SAM domain-containing protein        | energy production and conversion                     |
| <i>alr2051</i> | 3,445   | 1,509   | -2,284 | gamma-glutamyltranspeptidase                 | glutathione metabolism                               |
| <i>all3116</i> | 8,543   | 3,741   | -2,284 | unknown                                      | unknown                                              |
| <i>alr0947</i> | 7,615   | 3,334   | -2,284 | abortive infection protein                   | resistance, adaptations to atypical conditions       |
| <i>alr7612</i> | 9,730   | 4,261   | -2,284 | DNA-directed RNA polymerase subunit beta     | RNA synthesis and modification                       |
| <i>alr1960</i> | 189,007 | 82,826  | -2,282 | unknown                                      | unknown                                              |
| <i>alr1414</i> | 11,786  | 5,185   | -2,273 | adenosylhomocysteinase                       | thioether formation                                  |
| <i>alr7210</i> | 2,272   | 0,000   | -2,272 | unknown                                      | unknown                                              |
| <i>alr1216</i> | 86,403  | 38,039  | -2,271 | photosystem II 12 kD extrinsic protein PsbU  | photosynthesis                                       |
| <i>alr7278</i> | 2,267   | 0,000   | -2,267 | unknown                                      | unknown                                              |
| <i>all1787</i> | 28,068  | 12,388  | -2,266 | exopolysaccharide synthesis, ExoD            | exopolysaccharide biosynthesis                       |
| <i>all1760</i> | 13,769  | 6,077   | -2,266 | transcription termination factor; NusB       | RNA synthesis and modification                       |
| <i>all1931</i> | 2,264   | 0,000   | -2,264 | unknown                                      | unknown                                              |
| <i>all0107</i> | 818,002 | 361,731 | -2,261 | photosystem I subunit XI; PsaL               | photosynthesis                                       |
| <i>alr4368</i> | 6,248   | 2,770   | -2,256 | serine/threonine kinase; PknD                | regulatory functions                                 |
| <i>all4931</i> | 20,149  | 8,959   | -2,249 | unknown                                      | unknown                                              |
| <i>alr0504</i> | 2,245   | 0,000   | -2,245 | unknown                                      | unknown                                              |
| <i>alr7077</i> | 2,245   | 0,000   | -2,245 | unknown                                      | unknown                                              |

|                |        |        |        |                                                                                           |                                                                                     |
|----------------|--------|--------|--------|-------------------------------------------------------------------------------------------|-------------------------------------------------------------------------------------|
| <i>asl8512</i> | 2,245  | 0,000  | -2,245 | unknown                                                                                   | unknown                                                                             |
| <i>all2316</i> | 18,846 | 8,396  | -2,245 | aldo/keto reductase                                                                       | other enzymes                                                                       |
| <i>alr2185</i> | 6,289  | 2,802  | -2,245 | ferrichrome-iron receptor                                                                 | transport across membrane                                                           |
| <i>alr1133</i> | 38,437 | 17,148 | -2,241 | unknown                                                                                   | unknown                                                                             |
| <i>alr2957</i> | 45,737 | 20,451 | -2,236 | putative carbohydrate kinase                                                              | sugars                                                                              |
| <i>alr0336</i> | 2,231  | 0,000  | -2,231 | unknown                                                                                   | unknown                                                                             |
| <i>all0575</i> | 2,224  | 0,000  | -2,224 | unknown                                                                                   | unknown                                                                             |
| <i>alr1244</i> | 4,491  | 2,023  | -2,220 | shikimate kinase                                                                          | amino acids biosynthesis and metabolism                                             |
| <i>all0375</i> | 3,819  | 1,720  | -2,220 | holliday junction DNA helicase; RuvA                                                      | DNA replication, recombination and repair                                           |
| <i>alr3988</i> | 3,240  | 1,459  | -2,220 | exonuclease SbcC                                                                          | DNA replication, recombination and repair                                           |
| <i>alr2514</i> | 2,492  | 1,122  | -2,220 | cytochrome c oxidase subunit II                                                           | electron transport chain                                                            |
| <i>all4391</i> | 3,084  | 1,389  | -2,220 | enoyl-[acyl-carrier-protein] reductase                                                    | lipid metabolism                                                                    |
| <i>alr0766</i> | 5,066  | 2,282  | -2,220 | hydrogenase large subunit; HoxH                                                           | other enzymes                                                                       |
| <i>alr2280</i> | 3,874  | 1,745  | -2,220 | two-component response regulator                                                          | regulatory functions                                                                |
| <i>all4205</i> | 39,870 | 17,957 | -2,220 | 50S ribosomal protein L14                                                                 | ribosome component                                                                  |
| <i>alr1383</i> | 1,500  | 0,675  | -2,220 | iron(III) ABC transporter, permease protein                                               | transport across membrane                                                           |
| <i>all3531</i> | 2,342  | 1,055  | -2,220 | unknown                                                                                   | unknown                                                                             |
| <i>all3786</i> | 4,684  | 2,110  | -2,220 | unknown                                                                                   | unknown                                                                             |
| <i>all4472</i> | 2,818  | 1,269  | -2,220 | unknown                                                                                   | unknown                                                                             |
| <i>all4479</i> | 4,984  | 2,245  | -2,220 | unknown                                                                                   | unknown                                                                             |
| <i>all7081</i> | 2,469  | 1,112  | -2,220 | unknown                                                                                   | unknown                                                                             |
| <i>alr1358</i> | 4,644  | 2,092  | -2,220 | Mg-protoporphyrin IX monomethyl ester<br>(oxidative) cyclase                              | chlorophyll biosynthesis<br>degradation of proteins, peptides, and<br>glycopeptides |
| <i>all0266</i> | 1,870  | 0,842  | -2,220 | aminopeptidase P                                                                          | glycopeptides                                                                       |
| <i>alr7199</i> | 1,436  | 0,647  | -2,220 | plasmid recombinant protein                                                               | DNA replication, recombination and repair                                           |
| <i>alr0952</i> | 7,859  | 3,540  | -2,220 | cytochrome c oxidase subunit III                                                          | electron transport chain                                                            |
| <i>all3305</i> | 8,223  | 3,703  | -2,220 | PatL                                                                                      | heterocyst differentiation                                                          |
| <i>all1693</i> | 2,654  | 1,195  | -2,220 | glycerol-3-phosphate dehydrogenase<br>glutathione dependent formaldehyde<br>dehydrogenase | lipid metabolism                                                                    |
| <i>all2810</i> | 2,209  | 0,995  | -2,220 | HAD-superfamily hydrolase subfamily IA, variant<br>3                                      | methane metabolism                                                                  |
| <i>all1058</i> | 2,399  | 1,081  | -2,220 | probable flavoprotein                                                                     | other enzymes                                                                       |
| <i>all3891</i> | 5,726  | 2,579  | -2,220 | allophycocyanin B alpha chain;ApcD                                                        | photosynthesis                                                                      |
| <i>all3653</i> | 15,136 | 6,817  | -2,220 | oxidoreductase                                                                            | phycobilisomes and phycobiliproteins                                                |
| <i>all5008</i> | 2,289  | 1,031  | -2,220 | protein-tyrosine-phosphatase                                                              | redox reactions                                                                     |
| <i>alr1067</i> | 11,196 | 5,043  | -2,220 | serine/threonine kinase                                                                   | regulatory functions                                                                |
| <i>alr3268</i> | 1,557  | 0,701  | -2,220 | two-component hybrid sensor and regulator                                                 | regulatory functions                                                                |
| <i>all1639</i> | 2,349  | 1,058  | -2,220 | two-component sensor histidine kinase                                                     | regulatory functions                                                                |
| <i>all7605</i> | 5,250  | 2,365  | -2,220 | two-component sensor histidine kinase                                                     | regulatory functions                                                                |
| <i>alr3225</i> | 0,828  | 0,373  | -2,220 | aminoglycoside phosphotransferase                                                         | regulatory functions                                                                |
| <i>alr2463</i> | 3,968  | 1,787  | -2,220 |                                                                                           | resistance, adaptations to atypical conditions                                      |

|                |        |        |        |                                                  |                                           |
|----------------|--------|--------|--------|--------------------------------------------------|-------------------------------------------|
| <i>alr7552</i> | 0,901  | 0,406  | -2,220 | similar to ATP-dependent RNA helicase            | RNA synthesis and modification            |
| <i>all4989</i> | 2,151  | 0,969  | -2,220 | glycoside hydrolase family 65, central catalytic | sugars                                    |
| <i>alr5240</i> | 3,193  | 1,438  | -2,220 | glycosyl transferase                             | sugars                                    |
| <i>all0041</i> | 5,124  | 2,308  | -2,220 | UDP-glucose 6-dehydrogenase                      | sugars                                    |
| <i>alr4741</i> | 2,940  | 1,324  | -2,220 | S-layer region-like protein                      | surface components                        |
| <i>all4242</i> | 2,162  | 0,974  | -2,220 | potassium-dependent ATPase subunit D'            | transport across membrane                 |
| <i>all4130</i> | 5,413  | 2,438  | -2,220 | ABC transporter, binding protein component       | transport across membrane                 |
| <i>all3747</i> | 5,377  | 2,422  | -2,220 | TonB box-like                                    | transport across membrane                 |
| <i>alr2305</i> | 9,395  | 4,231  | -2,220 | MOSC domain-containing protein                   | unknown                                   |
| <i>all2893</i> | 6,077  | 2,737  | -2,220 | TPR repeat-containing protein                    | unknown                                   |
| <i>all0437</i> | 16,026 | 7,218  | -2,220 | unknown                                          | unknown                                   |
| <i>all0969</i> | 1,502  | 0,677  | -2,220 | unknown                                          | unknown                                   |
| <i>all1043</i> | 3,449  | 1,553  | -2,220 | unknown                                          | unknown                                   |
| <i>all1626</i> | 0,920  | 0,415  | -2,220 | unknown                                          | unknown                                   |
| <i>all2038</i> | 1,099  | 0,495  | -2,220 | unknown                                          | unknown                                   |
| <i>all2804</i> | 5,014  | 2,258  | -2,220 | unknown                                          | unknown                                   |
| <i>all4041</i> | 4,128  | 1,859  | -2,220 | unknown                                          | unknown                                   |
| <i>alr0340</i> | 2,059  | 0,927  | -2,220 | unknown                                          | unknown                                   |
| <i>alr0857</i> | 6,287  | 2,832  | -2,220 | unknown                                          | unknown                                   |
| <i>alr1330</i> | 5,377  | 2,422  | -2,220 | unknown                                          | unknown                                   |
| <i>alr1926</i> | 4,149  | 1,869  | -2,220 | unknown                                          | unknown                                   |
| <i>alr2558</i> | 5,307  | 2,390  | -2,220 | unknown                                          | unknown                                   |
| <i>alr2710</i> | 2,919  | 1,315  | -2,220 | unknown                                          | unknown                                   |
| <i>alr3639</i> | 3,168  | 1,427  | -2,220 | unknown                                          | unknown                                   |
| <i>alr4684</i> | 9,541  | 4,297  | -2,220 | unknown                                          | unknown                                   |
| <i>alr5121</i> | 4,007  | 1,804  | -2,220 | unknown                                          | unknown                                   |
| <i>alr7253</i> | 6,099  | 2,747  | -2,220 | unknown                                          | unknown                                   |
| <i>alr7502</i> | 8,340  | 3,756  | -2,220 | unknown                                          | unknown                                   |
| <i>alr7536</i> | 1,342  | 0,604  | -2,220 | unknown                                          | unknown                                   |
| <i>alr7620</i> | 5,880  | 2,648  | -2,220 | unknown                                          | unknown                                   |
| <i>asl0060</i> | 17,028 | 7,669  | -2,220 | unknown                                          | unknown                                   |
| <i>asl2360</i> | 24,767 | 11,155 | -2,220 | unknown                                          | unknown                                   |
| <i>asl8084</i> | 8,340  | 3,756  | -2,220 | unknown                                          | unknown                                   |
| <i>asr2781</i> | 28,678 | 12,916 | -2,220 | unknown                                          | unknown                                   |
| <i>alr4702</i> | 2,599  | 1,170  | -2,220 | unknown                                          | unknown                                   |
| <i>alr2310</i> | 2,355  | 1,061  | -2,220 | similar to agmatinase                            | urea cycle and metabolism of amino groups |
| <i>alr7082</i> | 2,220  | 0,000  | -2,220 | chromosome partitioning protein, ParA family     | nucleoproteins                            |
| <i>alr3185</i> | 34,713 | 15,753 | -2,204 | ATPase                                           | posttranslational modifications           |
| <i>asr4449</i> | 2,203  | 0,000  | -2,203 | lipoate-protein ligase B                         | unknown                                   |
| <i>alr0488</i> | 22,404 | 10,188 | -2,199 | unknown                                          | amino acids biosynthesis and metabolism   |
| <i>alr5055</i> | 29,617 | 13,468 | -2,199 | pyrroline-5-carboxylate reductase                | unknown                                   |
|                |        |        |        | unknown                                          | unknown                                   |

|                |         |         |        |                                                    |                                                  |
|----------------|---------|---------|--------|----------------------------------------------------|--------------------------------------------------|
| <i>alr1954</i> | 37,800  | 17,214  | -2,196 | unknown                                            | unknown                                          |
| <i>alr1107</i> | 2,193   | 0,000   | -2,193 | phosphoglycerate mutase                            | glycolysis                                       |
| <i>alr1815</i> | 2,193   | 0,000   | -2,193 | unknown                                            | unknown                                          |
| <i>all4388</i> | 8,982   | 4,098   | -2,191 | polysaccharide export protein                      | exopolysaccharide biosynthesis                   |
| <i>asr1592</i> | 45,275  | 20,659  | -2,191 | 30S ribosomal protein S20                          | ribosome component                               |
| <i>all3549</i> | 2,189   | 0,000   | -2,189 | similar to phycoerythrobilin lyase subunit (cpeF)  | phycobilisomes and phycobiliproteins             |
| <i>alr3214</i> | 2,189   | 0,000   | -2,189 | unknown                                            | unknown                                          |
| <i>all0232</i> | 17,236  | 7,888   | -2,185 | unknown                                            | unknown                                          |
| <i>all4081</i> | 8,398   | 3,843   | -2,185 | unknown                                            | unknown                                          |
| <i>alr4525</i> | 2,182   | 0,000   | -2,182 | unknown                                            | unknown                                          |
| <i>asr3830</i> | 307,471 | 141,111 | -2,179 | unknown                                            | unknown                                          |
| <i>alr2009</i> | 38,328  | 17,605  | -2,177 | chromosomal replication initiator protein DnaA     | DNA replication, recombination and repair        |
| <i>all4418</i> | 8,052   | 3,702   | -2,175 | adenosine/AMP deaminase                            | nucleotide transport and metabolism              |
| <i>alr2800</i> | 2,226   | 1,023   | -2,175 | WD-repeat protein                                  | regulatory functions                             |
| <i>asr0742</i> | 44,480  | 20,451  | -2,175 | 30S ribosomal protein S21                          | ribosome component                               |
| <i>all2646</i> | 1,882   | 0,865   | -2,175 | polyketide synthase type I                         | siderophore/cyanotoxin biosynthesis              |
| <i>all5089</i> | 5,850   | 2,690   | -2,175 | phosphoglucomutase/phosphomannomutase              | sugars                                           |
| <i>alr5291</i> | 5,040   | 2,317   | -2,175 | similar to alkaline phosphatase                    | unknown                                          |
| <i>all4838</i> | 8,705   | 4,022   | -2,164 | serine/threonine kinase                            | regulatory functions                             |
| <i>all1813</i> | 2,162   | 0,000   | -2,162 | unknown                                            | unknown                                          |
| <i>all3267</i> | 2,162   | 0,000   | -2,162 | unknown                                            | unknown                                          |
| <i>all4632</i> | 2,162   | 0,000   | -2,162 | unknown                                            | unknown                                          |
| <i>alr1422</i> | 2,162   | 0,000   | -2,162 | unknown                                            | unknown                                          |
| <i>alr5053</i> | 13,124  | 6,085   | -2,157 | prolyl-tRNA synthetase                             | aminoacyl tRNA synthetases and tRNA modification |
| <i>all0926</i> | 2,001   | 0,928   | -2,157 | two-component hybrid sensor and regulator          | regulatory functions                             |
| <i>all1173</i> | 10,502  | 4,869   | -2,157 | DNA-binding protein, starvation-inducible          | resistance, adaptations to atypical conditions   |
| <i>alr1112</i> | 5,423   | 2,514   | -2,157 | probable transglycosylase                          | sugars                                           |
| <i>alr7014</i> | 2,776   | 1,287   | -2,157 | ABC transporter ATP-binding protein                | transport across membrane                        |
| <i>alr2768</i> | 15,447  | 7,162   | -2,157 | pentapeptide repeat-containing protein             | unknown                                          |
| <i>all4829</i> | 15,691  | 7,275   | -2,157 | undecaprenyl-phosphate galactosephosphotransferase | cell envelope                                    |
| <i>alr1956</i> | 49,936  | 23,152  | -2,157 | phosphate starvation-inducible protein             | resistance, adaptations to atypical conditions   |
| <i>alr2046</i> | 2,565   | 1,189   | -2,157 | putative potassium/proton antiporter               | transport across membrane                        |
| <i>all3278</i> | 7,271   | 3,371   | -2,157 | ErfK/YbiS/YcfS/YnhG family protein                 | unknown                                          |
| <i>alr2576</i> | 6,529   | 3,027   | -2,157 | unknown                                            | unknown                                          |
| <i>alr7667</i> | 2,152   | 0,000   | -2,152 | unknown                                            | unknown                                          |
| <i>all7072</i> | 5,906   | 2,747   | -2,150 | unknown                                            | unknown                                          |
| <i>all2965</i> | 2,149   | 0,000   | -2,149 | unknown                                            | unknown                                          |
| <i>alr1602</i> | 21,317  | 9,928   | -2,147 | 6-phosphogluconolactonase                          | pentose phosphate pathway                        |
| <i>alr4240</i> | 9,804   | 4,566   | -2,147 | RTX toxin transporter                              | protein and peptide secretion                    |
| <i>alr4119</i> | 35,188  | 16,389  | -2,147 | unknown                                            | unknown                                          |

|                |         |         |        |                                                             |                                                      |
|----------------|---------|---------|--------|-------------------------------------------------------------|------------------------------------------------------|
| <i>all0404</i> | 2,142   | 0,000   | -2,142 | ATP-dependent Clp protease adaptor protein ClpS             | degradation of proteins, peptides, and glycopeptides |
| <i>all1033</i> | 2,142   | 0,000   | -2,142 | transcriptional regulator, XRE family                       | regulatory functions                                 |
| <i>all7223</i> | 2,142   | 0,000   | -2,142 | unknown                                                     | unknown                                              |
| <i>alr5335</i> | 2,142   | 0,000   | -2,142 | unknown                                                     | unknown                                              |
| <i>all4501</i> | 14,137  | 6,603   | -2,141 | phosphate regulon transcriptional regulator                 | regulatory functions                                 |
| <i>all4572</i> | 11,720  | 5,474   | -2,141 | phosphate ABC transporter, ATP-binding protein              | transport across membrane                            |
| <i>asl2403</i> | 340,751 | 159,642 | -2,134 | unknown                                                     | unknown                                              |
| <i>alr5284</i> | 12,706  | 5,955   | -2,134 | unknown                                                     | unknown                                              |
| <i>all1804</i> | 3,354   | 1,572   | -2,134 | two-component hybrid sensor and regulator                   | regulatory functions                                 |
| <i>alr4979</i> | 84,625  | 39,682  | -2,133 | unknown                                                     | unknown                                              |
| <i>all1944</i> | 2,131   | 0,000   | -2,131 | phenazine biosynthesis PhzC/PhzF protein                    | other enzymes                                        |
| <i>all4376</i> | 12,973  | 6,092   | -2,130 | probable glycosyl transferase                               | sugars                                               |
| <i>all1887</i> | 17,700  | 8,322   | -2,127 | unknown                                                     | unknown                                              |
| <i>all2580</i> | 2,123   | 0,000   | -2,123 | transcriptional regulator                                   | regulatory functions                                 |
| <i>asr0183</i> | 2,123   | 0,000   | -2,123 | unknown                                                     | unknown                                              |
| <i>asr1373</i> | 2,123   | 0,000   | -2,123 | unknown                                                     | unknown                                              |
| <i>asr2978</i> | 2,123   | 0,000   | -2,123 | unknown                                                     | unknown                                              |
| <i>alr3537</i> | 28,777  | 13,557  | -2,123 | N-acetyl-glutamate semialdehyde dehydrogenase; HisH         | urea cycle and metabolism of amino groups            |
| <i>all3794</i> | 19,742  | 9,336   | -2,115 | tryptophan synthase beta subunit                            | amino acids biosynthesis and metabolism              |
| <i>alr1952</i> | 4,756   | 2,249   | -2,115 | signal recognition particle protein                         | protein and peptide secretion                        |
| <i>all1904</i> | 1,356   | 0,641   | -2,115 | adenylate cyclase; CyaB2                                    | regulatory functions                                 |
| <i>all1389</i> | 1,438   | 0,680   | -2,115 | two-component hybrid sensor and regulator                   | regulatory functions                                 |
| <i>all1127</i> | 10,287  | 4,865   | -2,115 | NADH dehydrogenase                                          | respiration, oxidative phosphorylation               |
| <i>alr0972</i> | 4,633   | 2,191   | -2,115 | ABC transporter ATP-binding protein                         | transport across membrane                            |
| <i>all2050</i> | 2,138   | 1,011   | -2,115 | unknown                                                     | unknown                                              |
| <i>all4378</i> | 4,812   | 2,275   | -2,115 | unknown                                                     | unknown                                              |
| <i>all5018</i> | 8,523   | 4,030   | -2,115 | unknown                                                     | unknown                                              |
| <i>alr2207</i> | 4,126   | 1,951   | -2,115 | unknown                                                     | unknown                                              |
| <i>alr3925</i> | 1,182   | 0,559   | -2,115 | unknown                                                     | unknown                                              |
| <i>alr7636</i> | 3,841   | 1,816   | -2,115 | unknown                                                     | unknown                                              |
| <i>asl4122</i> | 21,622  | 10,225  | -2,115 | methionyl-tRNA formyltransferase                            | aminoacyl tRNA synthetases and tRNA modification     |
| <i>all4274</i> | 2,780   | 1,315   | -2,115 | probable 2-octaprenyl-6-methoxyphenol 4-monooxygenase; UbiH | coenzymes and cofactors                              |
| <i>all3970</i> | 10,425  | 4,930   | -2,115 | endonuclease III                                            | DNA degradation and modification                     |
| <i>all1323</i> | 1,822   | 0,861   | -2,115 | DNA primase                                                 | DNA replication, recombination and repair            |
| <i>all1361</i> | 2,254   | 1,066   | -2,115 | similar to cytochrome P450                                  | electron transport chain                             |
| <i>all1876</i> | 3,604   | 1,704   | -2,115 | diacylglycerol kinase                                       | lipid metabolism                                     |
| <i>all2928</i> | 67,362  | 31,856  | -2,115 | RNA-binding protein RbpB                                    | nucleoproteins                                       |
| <i>all4947</i> | 2,398   | 1,134   | -2,115 | metallophosphoesterase                                      | other enzymes                                        |

|                |        |        |        |                                                              |                                     |
|----------------|--------|--------|--------|--------------------------------------------------------------|-------------------------------------|
| <i>asl0108</i> | 93,409 | 44,174 | -2,115 | photosystem I subunit IX; PsaJ                               | photosynthesis                      |
| <i>alr9001</i> | 1,953  | 0,923  | -2,115 | similar to mobilization protein                              | plasmid mobilization                |
| <i>all2772</i> | 2,834  | 1,340  | -2,115 | two-component sensor histidine kinase                        | regulatory functions                |
| <i>alr4877</i> | 3,899  | 1,844  | -2,115 | WD-repeat protein                                            | regulatory functions                |
| <i>all5341</i> | 2,767  | 1,308  | -2,115 | probable glycosyl transferase                                | sugars                              |
| <i>all1294</i> | 10,519 | 4,975  | -2,115 | similar to ABC transporter                                   | transport across membrane           |
| <i>alr7329</i> | 8,223  | 3,889  | -2,115 | transposase                                                  | transposon-related functions        |
| <i>all1710</i> | 1,290  | 0,610  | -2,115 | unknown                                                      | unknown                             |
| <i>all2318</i> | 4,406  | 2,084  | -2,115 | unknown                                                      | unknown                             |
| <i>all3582</i> | 17,691 | 8,366  | -2,115 | unknown                                                      | unknown                             |
| <i>all5096</i> | 2,672  | 1,264  | -2,115 | unknown                                                      | unknown                             |
| <i>all5108</i> | 1,591  | 0,752  | -2,115 | unknown                                                      | unknown                             |
| <i>alr3490</i> | 2,734  | 1,293  | -2,115 | unknown                                                      | unknown                             |
| <i>alr7124</i> | 1,989  | 0,941  | -2,115 | unknown                                                      | unknown                             |
| <i>all0251</i> | 2,108  | 0,000  | -2,108 | metallophosphoesterase                                       | other enzymes                       |
|                |        |        |        | chloroplatic outer envelope membrane protein                 |                                     |
| <i>alr2269</i> | 10,220 | 4,855  | -2,105 | homolog                                                      | cell envelope                       |
| <i>alr1311</i> | 26,777 | 12,761 | -2,098 | serine/threonine kinase                                      | regulatory functions                |
| <i>alr2991</i> | 2,098  | 0,000  | -2,098 | DnaJ protein                                                 | heat shock proteins and chaperones  |
| <i>alr4693</i> | 2,098  | 0,000  | -2,098 | unknown                                                      | unknown                             |
| <i>all4379</i> | 12,086 | 5,784  | -2,090 | peptide-chain-release factor 3                               | regulatory functions                |
| <i>alr3827</i> | 33,325 | 15,954 | -2,089 | unknown                                                      | unknown                             |
|                |        |        |        | fdxN element excision controlling factor protein             |                                     |
| <i>alr1462</i> | 2,085  | 0,000  | -2,085 | XisI                                                         | heterocyst differentiation          |
|                |        |        |        | putative monovalent cation/H <sup>+</sup> antiporter subunit |                                     |
| <i>all1843</i> | 2,085  | 0,000  | -2,085 | C                                                            | transport across membrane           |
| <i>alr7531</i> | 2,085  | 0,000  | -2,085 | unknown                                                      | unknown                             |
| <i>asl2397</i> | 2,085  | 0,000  | -2,085 | unknown                                                      | unknown                             |
| <i>asl7181</i> | 2,085  | 0,000  | -2,085 | unknown                                                      | unknown                             |
| <i>asr3694</i> | 2,085  | 0,000  | -2,085 | unknown                                                      | unknown                             |
| <i>all4578</i> | 66,145 | 31,734 | -2,084 | unknown                                                      | unknown                             |
| <i>alr4531</i> | 2,154  | 1,033  | -2,084 | unknown                                                      | unknown                             |
|                |        |        |        | tRNA (5-methylaminomethyl-2-thiouridylate)-                  | aminoacyl tRNA synthetases and tRNA |
| <i>all1359</i> | 15,215 | 7,300  | -2,084 | methyltransferase                                            | modification                        |
| <i>alr1903</i> | 1,735  | 0,832  | -2,084 | unknown                                                      | unknown                             |
| <i>alr2864</i> | 2,080  | 0,000  | -2,080 | probable glycosyl transferase                                | sugars                              |
| <i>all7662</i> | 2,073  | 0,000  | -2,073 | high light inducible protein                                 | electron transport chain            |
| <i>alr5156</i> | 2,073  | 0,000  | -2,073 | unknown                                                      | unknown                             |
| <i>alr1742</i> | 36,096 | 17,419 | -2,072 | DnaK-type molecular chaperone; DnaK                          | heat shock proteins and chaperones  |
| <i>all2875</i> | 7,129  | 3,442  | -2,071 | two-component hybrid sensor and regulator                    | regulatory functions                |
| <i>all1970</i> | 2,070  | 0,000  | -2,070 | unknown                                                      | unknown                             |
| <i>alr3758</i> | 2,067  | 0,000  | -2,067 | probable anti-sigma factor antagonist                        | regulatory functions                |



|                |         |         |        |                                                                                                 |                                                         |
|----------------|---------|---------|--------|-------------------------------------------------------------------------------------------------|---------------------------------------------------------|
| <i>all0004</i> | 24,017  | 11,649  | -2,062 | ATP synthase subunit gamma; AtpC                                                                | energy production and conversion                        |
| <i>all0852</i> | 7,477   | 3,627   | -2,062 | cyclase/dehydrase                                                                               | other enzymes                                           |
| <i>all3552</i> | 11,019  | 5,345   | -2,062 | exopolyphosphatase                                                                              | purine/pyrimidine biosynthesis and metabolism           |
| <i>alr1575</i> | 1,448   | 0,703   | -2,062 | possible Sensor with Chase2 domain                                                              | regulatory functions                                    |
| <i>all7606</i> | 6,170   | 2,993   | -2,062 | two-component response regulator                                                                | regulatory functions                                    |
| <i>all1767</i> | 9,035   | 4,382   | -2,062 | probable glycosyl transferase                                                                   | sugars                                                  |
| <i>alr3757</i> | 2,187   | 1,061   | -2,062 | cellulose synthase catalytic subunit                                                            | cell envelope                                           |
| <i>alr0939</i> | 3,388   | 1,643   | -2,062 | biotin carboxylase; AccC                                                                        | lipid metabolism                                        |
| <i>all1205</i> | 4,912   | 2,383   | -2,062 | alpha/beta hydrolase fold protein                                                               | other enzymes                                           |
| <i>all3862</i> | 11,477  | 5,567   | -2,062 | GTP-binding protein                                                                             | regulatory functions                                    |
| <i>alr4586</i> | 4,406   | 2,137   | -2,062 | two-component sensor histidine kinase                                                           | regulatory functions                                    |
| <i>all1126</i> | 3,321   | 1,611   | -2,062 | NADH dehydrogenase                                                                              | respiration, oxidative phosphorylation                  |
| <i>alr1556</i> | 4,069   | 1,974   | -2,062 | ABC transporter, permease protein                                                               | transport across membrane                               |
| <i>alr1620</i> | 5,601   | 2,717   | -2,062 | ABC transporter, permease protein                                                               | transport across membrane                               |
| <i>all2778</i> | 4,464   | 2,165   | -2,062 | unknown                                                                                         | unknown                                                 |
| <i>alr1197</i> | 5,861   | 2,843   | -2,062 | unknown                                                                                         | unknown                                                 |
| <i>asr1328</i> | 58,380  | 28,317  | -2,062 | unknown                                                                                         | unknown                                                 |
| <i>alr1690</i> | 731,061 | 354,689 | -2,061 | cell wall-binding protein                                                                       | cell envelope                                           |
| <i>all2898</i> | 2,060   | 0,000   | -2,060 | two-component system response regulator                                                         | regulatory functions                                    |
| <i>alr3727</i> | 26,198  | 12,746  | -2,055 | photosystem II protein D1                                                                       | photosynthesis                                          |
| <i>alr1229</i> | 3,670   | 1,788   | -2,052 | two-component sensor histidine kinase                                                           | regulatory functions                                    |
| <i>alr4683</i> | 146,214 | 71,301  | -2,051 | RNA-binding protein RbpD                                                                        | nucleoproteins                                          |
| <i>alr3228</i> | 39,708  | 19,374  | -2,050 | unknown                                                                                         | unknown                                                 |
| <i>asl4409</i> | 2,048   | 0,000   | -2,048 | NB-ARC                                                                                          | resistance, adaptations to atypical conditions          |
| <i>asl1098</i> | 2,048   | 0,000   | -2,048 | unknown                                                                                         | unknown                                                 |
| <i>asl1446</i> | 2,048   | 0,000   | -2,048 | unknown                                                                                         | unknown                                                 |
| <i>all0129</i> | 27,307  | 13,359  | -2,044 | two-component response regulator; RpaA                                                          | regulatory functions                                    |
| <i>all3541</i> | 6,213   | 3,039   | -2,044 | unknown                                                                                         | unknown                                                 |
| <i>alr7073</i> | 2,039   | 0,000   | -2,039 | HAD family hydrolase                                                                            | other enzymes                                           |
| <i>all1557</i> | 2,034   | 0,000   | -2,034 | unknown                                                                                         | unknown                                                 |
| <i>all0493</i> | 10,265  | 5,057   | -2,030 | lipopolysaccharide biosynthesis protein                                                         | LPS biosynthesis                                        |
| <i>all4296</i> | 3,707   | 1,826   | -2,030 | AAA ATPase                                                                                      | posttranslational modifications                         |
| <i>alr2336</i> | 4,314   | 2,125   | -2,030 | phosphate permease                                                                              | transport across membrane                               |
| <i>alr5084</i> | 8,939   | 4,403   | -2,030 | endopeptidase Clp ATP-binding chain B<br>acyl-phosphate glycerol-3-phosphate<br>acyltransferase | degradation of proteins, peptides, and<br>glycopeptides |
| <i>all0492</i> | 8,230   | 4,054   | -2,030 | acyltransferase                                                                                 | lipid metabolism                                        |
| <i>alr5293</i> | 3,958   | 1,950   | -2,030 | secretion protein HlyD                                                                          | protein and peptide secretion                           |
| <i>asl2551</i> | 21,229  | 10,458  | -2,030 | transcriptional regulator                                                                       | regulatory functions                                    |
| <i>alr3593</i> | 5,070   | 2,497   | -2,030 | polyphosphate kinase                                                                            | respiration, oxidative phosphorylation                  |
| <i>alr7312</i> | 4,865   | 2,397   | -2,030 | unknown                                                                                         | unknown                                                 |
| <i>alr2938</i> | 18,589  | 9,157   | -2,030 | iron superoxide dismutase; SodB                                                                 | detoxification                                          |

|                |        |        |        |                                              |                                                                                                      |
|----------------|--------|--------|--------|----------------------------------------------|------------------------------------------------------------------------------------------------------|
| <i>alr0397</i> | 22,733 | 11,239 | -2,023 | similar to ferric aerobactin receptor        | transport across membrane                                                                            |
| <i>all4078</i> | 14,163 | 7,009  | -2,021 | unknown                                      | unknown                                                                                              |
| <i>all3688</i> | 2,019  | 0,000  | -2,019 | FAD dependent oxidoreductase                 | amino acids biosynthesis and metabolism                                                              |
| <i>all1321</i> | 2,013  | 0,000  | -2,013 | GCN5-related N-acetyltransferase             | other enzymes                                                                                        |
| <i>all4040</i> | 2,013  | 0,000  | -2,013 | KWG Leptospira repeat protein                | unknown                                                                                              |
| <i>alr3775</i> | 2,013  | 0,000  | -2,013 | unknown                                      | unknown                                                                                              |
| <i>alr0791</i> | 2,232  | 1,111  | -2,009 | outer membrane secretion protein             | cell envelope                                                                                        |
| <i>alr1054</i> | 4,919  | 2,449  | -2,009 | DNA polymerase III alpha subunit             | DNA replication, recombination and repair                                                            |
| <i>all4463</i> | 5,359  | 2,667  | -2,009 | exonuclease SbcD                             | DNA replication, recombination and repair                                                            |
| <i>all2115</i> | 7,624  | 3,795  | -2,009 | unknown                                      | unknown                                                                                              |
| <i>all4968</i> | 4,823  | 2,401  | -2,009 | glutathione reductase                        | detoxification                                                                                       |
| <i>alr5066</i> | 6,682  | 3,326  | -2,009 | UDP-N-acetylenolpyruvylglucosamine reductase | peptidoglycan biosynthesis                                                                           |
|                |        |        |        | serine/threonine kinase with two-component   |                                                                                                      |
| <i>all3557</i> | 1,229  | 0,612  | -2,009 | sensor domain                                | regulatory functions                                                                                 |
| <i>all5056</i> | 19,291 | 9,603  | -2,009 | transcriptional regulator                    | regulatory functions                                                                                 |
| <i>all2281</i> | 2,004  | 0,000  | -2,004 | two-component response regulator             | regulatory functions                                                                                 |
| <i>alr3707</i> | 8,543  | 17,209 | 2,014  | phycocyanobilin:ferredoxin oxidoreductase    | phytochromobilin biosynthesis                                                                        |
| <i>all2549</i> | 2,447  | 4,960  | 2,027  | putative glycosyl transferase, group 1       | sugars                                                                                               |
| <i>all2842</i> | 0,000  | 2,034  | 2,034  | unknown                                      | unknown                                                                                              |
| <i>all3032</i> | 5,897  | 12,085 | 2,049  | unknown                                      | unknown                                                                                              |
| <i>all1772</i> | 0,778  | 1,594  | 2,049  | unknown                                      | unknown                                                                                              |
| <i>alr3504</i> | 4,928  | 10,159 | 2,061  | putative diguanylate cyclase                 | regulatory functions                                                                                 |
| <i>asl3609</i> | 0,000  | 2,068  | 2,068  | unknown                                      | unknown                                                                                              |
| <i>all7167</i> | 0,000  | 2,068  | 2,068  | unknown                                      | unknown                                                                                              |
| <i>alr3670</i> | 3,283  | 6,793  | 2,069  | urease alpha subunit                         | nitrogen metabolism                                                                                  |
| <i>asl0994</i> | 0,000  | 2,092  | 2,092  | unknown                                      | unknown                                                                                              |
| <i>alr2092</i> | 0,989  | 2,080  | 2,102  | histidinol phosphate aminotransferase; HisC  | amino acids biosynthesis and metabolism                                                              |
| <i>alr4692</i> | 2,245  | 4,719  | 2,102  | transcriptional regulator                    | regulatory functions                                                                                 |
| <i>all1355</i> | 2,085  | 4,382  | 2,102  | unknown                                      | unknown                                                                                              |
| <i>all3643</i> | 2,085  | 4,382  | 2,102  | unknown                                      | unknown                                                                                              |
|                |        |        |        |                                              | aminoacyl tRNA synthetases and tRNA                                                                  |
| <i>alr5152</i> | 2,169  | 4,559  | 2,102  | ribonuclease Z                               | modification                                                                                         |
| <i>all3075</i> | 1,769  | 3,718  | 2,102  | Maf-like protein                             | cell division                                                                                        |
|                |        |        |        | putative corrinoid adenosyltransferase       |                                                                                                      |
| <i>all2391</i> | 0,924  | 1,943  | 2,102  | BtuR/CobO/CobP                               | cobalamin, heme, phycobilin and porphyrin<br>degradation of proteins, peptides, and<br>glycopeptides |
| <i>alr5164</i> | 1,743  | 3,663  | 2,102  | serine protease                              | glycopeptides                                                                                        |
| <i>alr3716</i> | 1,092  | 2,296  | 2,102  | exonuclease ABC subunit A                    | DNA replication, recombination and repair                                                            |
| <i>alr0079</i> | 0,850  | 1,787  | 2,102  | esterase                                     | lipid metabolism                                                                                     |
| <i>alr4059</i> | 5,516  | 11,594 | 2,102  | phosphopantetheine-binding protein           | lipid metabolism                                                                                     |
| <i>alr2968</i> | 2,787  | 5,859  | 2,102  | homocitrate synthase; NifV2                  | nitrogen fixation                                                                                    |
| <i>alr1713</i> | 3,020  | 6,347  | 2,102  | Mo-dependent nitrogenase-like                | nitrogen fixation                                                                                    |

|                |       |        |       |                                                                      |                                                |
|----------------|-------|--------|-------|----------------------------------------------------------------------|------------------------------------------------|
| <i>all3572</i> | 0,970 | 2,039  | 2,102 | photosystem II protein D1                                            | photosynthesis                                 |
| <i>alr0430</i> | 1,212 | 2,548  | 2,102 | probable short-chain dehydrogenase                                   | redox reactions                                |
| <i>alr3009</i> | 1,317 | 2,768  | 2,102 | CBS domain-containing protein                                        | redox reactions                                |
| <i>all2821</i> | 0,765 | 1,607  | 2,102 | two-component response regulator                                     | regulatory functions                           |
| <i>all0217</i> | 1,460 | 3,068  | 2,102 | patogenesis related protein                                          | resistance, adaptations to atypical conditions |
| <i>all0745</i> | 1,191 | 2,504  | 2,102 | ribosomal biogenesis GTPase                                          | ribosome biogenesis                            |
| <i>asl4211</i> | 3,766 | 7,916  | 2,102 | 30S ribosomal protein S19                                            | ribosome component                             |
| <i>alr2890</i> | 1,347 | 2,832  | 2,102 | RNA-binding S4 domain-containing protein                             | translation                                    |
| <i>all7196</i> | 0,569 | 1,195  | 2,102 | ABC transporter ATP-binding protein                                  | transport across membrane                      |
| <i>all4732</i> | 0,580 | 1,219  | 2,102 | ABC transporter, ATP-binding protein                                 | transport across membrane                      |
| <i>all2610</i> | 0,408 | 0,858  | 2,102 | ferrichrome-iron receptor                                            | transport across membrane                      |
| <i>all3624</i> | 2,351 | 4,941  | 2,102 | transposase                                                          | transposon-related functions                   |
| <i>all3114</i> | 1,214 | 2,552  | 2,102 | pentapeptide repeat-containing protein                               | unknown                                        |
| <i>asl4014</i> | 7,076 | 14,873 | 2,102 | unknown                                                              | unknown                                        |
| <i>asr0098</i> | 6,369 | 13,386 | 2,102 | unknown                                                              | unknown                                        |
| <i>asr0105</i> | 3,936 | 8,272  | 2,102 | unknown                                                              | unknown                                        |
| <i>alr1536</i> | 2,895 | 6,085  | 2,102 | unknown                                                              | unknown                                        |
| <i>alr1622</i> | 1,751 | 3,681  | 2,102 | unknown                                                              | unknown                                        |
| <i>alr3365</i> | 1,052 | 2,211  | 2,102 | unknown                                                              | unknown                                        |
| <i>alr2888</i> | 2,780 | 5,843  | 2,102 | unknown                                                              | unknown                                        |
| <i>alr8543</i> | 1,607 | 3,377  | 2,102 | unknown                                                              | unknown                                        |
| <i>all4679</i> | 1,523 | 3,201  | 2,102 | unknown                                                              | unknown                                        |
| <i>alr0586</i> | 1,055 | 2,218  | 2,102 | unknown                                                              | unknown                                        |
| <i>alr3357</i> | 0,865 | 1,818  | 2,102 | unknown                                                              | unknown                                        |
| <i>alr0132</i> | 0,787 | 1,654  | 2,102 | unknown                                                              | unknown                                        |
| <i>asr1335</i> | 6,255 | 13,147 | 2,102 | unknown                                                              | unknown                                        |
| <i>alr1296</i> | 2,520 | 5,297  | 2,102 | unknown                                                              | unknown                                        |
| <i>alr2967</i> | 2,520 | 5,297  | 2,102 | unknown                                                              | unknown                                        |
| <i>all2704</i> | 1,126 | 2,367  | 2,102 | unknown                                                              | unknown                                        |
| <i>all0911</i> | 0,000 | 2,116  | 2,116 | ABC phosphate transport system phosphate-binding periplasmic protein | transport across membrane                      |
| <i>asl2490</i> | 0,000 | 2,116  | 2,116 | unknown                                                              | unknown                                        |
| <i>all3320</i> | 3,958 | 8,423  | 2,128 | unknown                                                              | unknown                                        |
| <i>all2006</i> | 6,097 | 12,975 | 2,128 | unknown                                                              | unknown                                        |
| <i>all0218</i> | 8,271 | 17,639 | 2,133 | pyridoxal phosphate biosynthetic protein PdxJ                        | vitamin biosynthesis                           |
| <i>asl0491</i> | 0,000 | 2,140  | 2,140 | unknown                                                              | unknown                                        |
| <i>asl1938</i> | 0,000 | 2,140  | 2,140 | unknown                                                              | unknown                                        |
| <i>alr5272</i> | 1,708 | 3,671  | 2,150 | two-component sensor histidine kinase                                | regulatory functions                           |
| <i>all4985</i> | 1,592 | 3,421  | 2,150 | sucrose synthase                                                     | sugars                                         |
| <i>alr2680</i> | 0,510 | 1,096  | 2,150 | polyketide synthase                                                  | siderophore/cyanotoxin biosynthesis            |
| <i>alr7015</i> | 0,000 | 2,153  | 2,153 | aminoglycoside N6'-acetyltransferase                                 | resistance, adaptations to atypical conditions |
| <i>asr5146</i> | 0,000 | 2,165  | 2,165 | unknown                                                              | unknown                                        |

|                |        |        |       |                                               |                                                |
|----------------|--------|--------|-------|-----------------------------------------------|------------------------------------------------|
| <i>alr4309</i> | 6,066  | 13,147 | 2,167 | unknown                                       | unknown                                        |
| <i>alr0181</i> | 1,958  | 4,245  | 2,167 | unknown                                       | unknown                                        |
| <i>all1070</i> | 0,000  | 2,204  | 2,204 | purine-binding chemotaxis protein cheW        | chemotaxis and cell motility                   |
| <i>alr0877</i> | 5,724  | 12,631 | 2,207 | acylphosphatase                               | energy production and conversion               |
| <i>all0496</i> | 2,402  | 5,302  | 2,207 | unknown                                       | unknown                                        |
| <i>all1707</i> | 4,543  | 10,026 | 2,207 | unknown                                       | unknown                                        |
| <i>alr4806</i> | 5,456  | 12,041 | 2,207 | serine hydroxymethyltransferase               | cellular one-carbon cycle                      |
| <i>alr4269</i> | 3,444  | 7,601  | 2,207 | radical SAM domain-containing protein         | other enzymes                                  |
| <i>alr0356</i> | 4,068  | 8,978  | 2,207 | two-component response regulator              | regulatory functions                           |
| <i>all0579</i> | 7,631  | 16,842 | 2,207 | 50S ribosomal protein L9                      | ribosome component                             |
| <i>all3575</i> | 2,195  | 4,844  | 2,207 | ABC transporter, ATP-binding protein          | transport across membrane                      |
| <i>all7111</i> | 2,354  | 5,195  | 2,207 | transposase                                   | transposon-related functions                   |
| <i>all0476</i> | 4,246  | 9,370  | 2,207 | unknown                                       | unknown                                        |
| <i>alr4468</i> | 0,000  | 2,245  | 2,245 | probable phosphinothricin N-acetyltransferase | other enzymes                                  |
| <i>asl0629</i> | 0,000  | 2,245  | 2,245 | HNH endonuclease                              | resistance, adaptations to atypical conditions |
| <i>asr0179</i> | 0,000  | 2,245  | 2,245 | unknown                                       | unknown                                        |
| <i>asl2194</i> | 0,000  | 2,245  | 2,245 | unknown                                       | unknown                                        |
| <i>alr8560</i> | 1,360  | 3,063  | 2,252 | reverse transcriptase homolog                 | transposon-related functions                   |
| <i>alr2073</i> | 1,974  | 4,446  | 2,252 | glutamate N-acetyltransferase                 | urea cycle and metabolism of amino groups      |
| <i>alr0203</i> | 0,000  | 2,258  | 2,258 | unknown                                       | unknown                                        |
| <i>all8085</i> | 20,041 | 45,328 | 2,262 | unknown                                       | unknown                                        |
| <i>asr1005</i> | 0,000  | 2,272  | 2,272 | unknown                                       | unknown                                        |
| <i>asr7548</i> | 0,000  | 2,272  | 2,272 | unknown                                       | unknown                                        |
| <i>alr1552</i> | 1,907  | 4,343  | 2,277 | ABC transporter, ATP-binding protein          | transport across membrane                      |
| <i>alr1143</i> | 5,417  | 12,334 | 2,277 | unknown                                       | unknown                                        |
| <i>alr8073</i> | 0,000  | 2,291  | 2,291 | unknown                                       | unknown                                        |
| <i>all4609</i> | 3,407  | 7,811  | 2,293 | glycine cleavage system protein T             | salvage pathways                               |
| <i>asl7281</i> | 0,000  | 2,301  | 2,301 | unknown                                       | unknown                                        |
| <i>asl2805</i> | 0,000  | 2,330  | 2,330 | unknown                                       | unknown                                        |
| <i>all7091</i> | 0,000  | 2,345  | 2,345 | unknown                                       | unknown                                        |
| <i>asl2362</i> | 0,000  | 2,360  | 2,360 | lipoprotein; NlpD                             | lipid metabolism                               |
| <i>asl2540</i> | 0,000  | 2,360  | 2,360 | unknown                                       | unknown                                        |
| <i>alr5190</i> | 0,000  | 2,360  | 2,360 | unknown                                       | unknown                                        |
| <i>alr4456</i> | 0,871  | 2,060  | 2,365 | tropinone reductase homolog                   | alkaloid biosynthesis                          |
| <i>alr1965</i> | 1,086  | 2,568  | 2,365 | ATP phosphoribosyltransferase                 | amino acids biosynthesis and metabolism        |
| <i>all4895</i> | 0,987  | 2,335  | 2,365 | carotenoid oxygenase                          | carotenoids                                    |
| <i>alr3857</i> | 2,484  | 5,874  | 2,365 | cell division protein FtsQ                    | cell division                                  |
| <i>alr5348</i> | 0,521  | 1,233  | 2,365 | putative ParB family protein                  | cell division                                  |
| <i>all2544</i> | 1,128  | 2,667  | 2,365 | precorrin isomerase, CbiC/CobH                | cobalamin, heme, phycobilin and porphyrin      |
| <i>all0177</i> | 0,409  | 0,967  | 2,365 | heterocyst-specific flavodiiron protein, Flv1 | detoxification                                 |
| <i>alr1576</i> | 0,753  | 1,781  | 2,365 | dehydrogenase subunit                         | other enzymes                                  |
| <i>all4558</i> | 0,642  | 1,517  | 2,365 | Rieske (2Fe-2S) domain-containing protein     | redox reactions                                |

|                |        |        |       |                                                 |                                                |
|----------------|--------|--------|-------|-------------------------------------------------|------------------------------------------------|
| <i>alr2505</i> | 1,201  | 2,839  | 2,365 | aminotransferase, class V (cystein desulfurase) | thiamine metabolism                            |
| <i>alr3947</i> | 0,761  | 1,799  | 2,365 | cobalt transport protein CbiM                   | transport across membrane                      |
| <i>all7563</i> | 1,047  | 2,476  | 2,365 | transposase                                     | transposon-related functions                   |
| <i>all8069</i> | 1,150  | 2,720  | 2,365 | transposase                                     | transposon-related functions                   |
| <i>all7173</i> | 3,258  | 7,705  | 2,365 | unknown                                         | unknown                                        |
| <i>alr7239</i> | 1,507  | 3,562  | 2,365 | unknown                                         | unknown                                        |
| <i>all3461</i> | 1,899  | 4,489  | 2,365 | unknown                                         | unknown                                        |
| <i>all4460</i> | 1,262  | 2,985  | 2,365 | unknown                                         | unknown                                        |
| <i>all0254</i> | 1,007  | 2,380  | 2,365 | unknown                                         | unknown                                        |
| <i>alr0841</i> | 0,567  | 1,342  | 2,365 | unknown                                         | unknown                                        |
| <i>alr3090</i> | 3,033  | 7,171  | 2,365 | Mn-catalase                                     | detoxification                                 |
| <i>all4708</i> | 1,102  | 2,605  | 2,365 | thymidylate kinase                              | DNA replication, recombination and repair      |
| <i>alr0241</i> | 2,193  | 5,185  | 2,365 | 1-acyl-sn-glycerol-3-phosphate acyltransferase  | lipid metabolism                               |
| <i>alr0038</i> | 0,654  | 1,547  | 2,365 | dTDP-glucose 4-6-dehydratase; RfbB              | LPS biosynthesis                               |
| <i>asr4517</i> | 14,153 | 33,465 | 2,365 | phycobilisome degradation protein; NblA         | phycobilisome and phycobiliproteins            |
| <i>all0792</i> | 1,578  | 3,731  | 2,365 | Streptomyces cyclase/dehydrase                  | polyketide biosynthesis                        |
| <i>alr2242</i> | 0,299  | 0,706  | 2,365 | putative signal transduction protein            | regulatory functions                           |
| <i>all8086</i> | 1,552  | 3,669  | 2,365 | transcriptional regulator                       | regulatory functions                           |
| <i>alr4992</i> | 1,273  | 3,009  | 2,365 | transcriptional regulator, TetR family          | regulatory functions                           |
| <i>all0825</i> | 0,341  | 0,807  | 2,365 | two-component sensor histidine kinase           | regulatory functions                           |
| <i>alr1010</i> | 1,839  | 4,348  | 2,365 | calcium-binding protein, CcbP                   | regulatory functions                           |
| <i>all2918</i> | 0,989  | 2,340  | 2,365 | putative secreted nuclease                      | resistance, adaptations to atypical conditions |
| <i>all2964</i> | 0,527  | 1,246  | 2,365 | probable NADH dehydrogenase                     | respiration, oxidative phosphorylation         |
| <i>all1702</i> | 1,633  | 3,861  | 2,365 | anti-sigma B factor                             | RNA synthesis and modification                 |
| <i>all2037</i> | 0,636  | 1,505  | 2,365 | glycosyltransferase group 1                     | sugars                                         |
| <i>all2011</i> | 1,487  | 3,517  | 2,365 | ABC transporter, permease protein               | transport across membrane                      |
| <i>asl4181</i> | 5,988  | 14,158 | 2,365 | preprotein translocation subunit SecE           | transport across membrane                      |
| <i>all0119</i> | 10,153 | 24,007 | 2,365 | unknown                                         | unknown                                        |
| <i>all4767</i> | 4,272  | 10,101 | 2,365 | unknown                                         | unknown                                        |
| <i>alr5135</i> | 2,312  | 5,467  | 2,365 | unknown                                         | unknown                                        |
| <i>all1292</i> | 1,633  | 3,861  | 2,365 | unknown                                         | unknown                                        |
| <i>all0037</i> | 1,567  | 3,706  | 2,365 | unknown                                         | unknown                                        |
| <i>alr3548</i> | 1,536  | 3,633  | 2,365 | unknown                                         | unknown                                        |
| <i>alr3828</i> | 1,516  | 3,586  | 2,365 | unknown                                         | unknown                                        |
| <i>alr4504</i> | 1,424  | 3,367  | 2,365 | unknown                                         | unknown                                        |
| <i>alr1449</i> | 1,210  | 2,861  | 2,365 | unknown                                         | unknown                                        |
| <i>all7616</i> | 1,020  | 2,411  | 2,365 | unknown                                         | unknown                                        |
| <i>all1467</i> | 0,942  | 2,226  | 2,365 | unknown                                         | unknown                                        |
| <i>alr3215</i> | 0,934  | 2,209  | 2,365 | unknown                                         | unknown                                        |
| <i>alr1959</i> | 0,891  | 2,108  | 2,365 | unknown                                         | unknown                                        |
| <i>all2617</i> | 0,701  | 1,658  | 2,365 | unknown                                         | unknown                                        |
| <i>alr1612</i> | 3,512  | 8,303  | 2,365 | unknown                                         | unknown                                        |

|                |       |        |       |                                              |                                                |
|----------------|-------|--------|-------|----------------------------------------------|------------------------------------------------|
| <i>all7598</i> | 2,715 | 6,421  | 2,365 | unknown                                      | unknown                                        |
| <i>alr2462</i> | 2,182 | 5,160  | 2,365 | unknown                                      | unknown                                        |
| <i>alr2071</i> | 1,469 | 3,473  | 2,365 | unknown                                      | unknown                                        |
| <i>asl1502</i> | 0,000 | 2,390  | 2,390 | unknown                                      | unknown                                        |
| <i>asr3389</i> | 0,000 | 2,422  | 2,422 | unknown                                      | unknown                                        |
| <i>all0936</i> | 2,985 | 7,320  | 2,452 | c-type cytochrome synthesis protein          | cytochrome biogenesis                          |
| <i>asr3621</i> | 0,000 | 2,454  | 2,454 | unknown                                      | unknown                                        |
| <i>alr8528</i> | 0,000 | 2,465  | 2,465 | unknown                                      | unknown                                        |
| <i>all3650</i> | 4,324 | 10,712 | 2,477 | unknown                                      | unknown                                        |
| <i>asr0081</i> | 0,000 | 2,521  | 2,521 | unknown                                      | unknown                                        |
| <i>all2128</i> | 5,166 | 13,031 | 2,522 | unknown                                      | unknown                                        |
| <i>alr4658</i> | 4,261 | 10,748 | 2,522 | unknown                                      | unknown                                        |
| <i>alr0806</i> | 3,695 | 9,319  | 2,522 | unknown                                      | unknown                                        |
| <i>alr1822</i> | 0,000 | 2,539  | 2,539 | unknown                                      | unknown                                        |
| <i>alr4934</i> | 3,163 | 8,160  | 2,579 | N-acyl-L-amino acid amidohydrolase           | lipid metabolism                               |
| <i>alr7354</i> | 0,000 | 2,592  | 2,592 | glutathione S-transferase                    | detoxification                                 |
| <i>alr8074</i> | 0,000 | 2,605  | 2,605 | unknown                                      | unknown                                        |
| <i>all8048</i> | 9,433 | 24,691 | 2,617 | unknown                                      | unknown                                        |
| <i>all4845</i> | 3,175 | 8,341  | 2,627 | phenylalanyl-tRNA synthetase alpha chain     | aminoacyl-tRNA synthesis and tRNA modification |
| <i>all3587</i> | 0,736 | 1,933  | 2,627 | two-component sensor histidine kinase        | regulatory functions                           |
| <i>asr1134</i> | 5,742 | 15,087 | 2,627 | putative CsbD-like protein                   | resistance, adaptations to atypical conditions |
|                |       |        |       | possible glyoxalase/bleomycin resistance     |                                                |
| <i>alr2074</i> | 2,557 | 6,717  | 2,627 | protein/dioxygenase                          | resistance, adaptations to atypical conditions |
| <i>alr4082</i> | 1,660 | 4,362  | 2,627 | transposase                                  | transposon-related functions                   |
| <i>all0958</i> | 0,736 | 1,933  | 2,627 | pentapeptide repeat containing protein       | unknown                                        |
| <i>alr1821</i> | 1,806 | 4,744  | 2,627 | unknown                                      | unknown                                        |
| <i>all7633</i> | 1,441 | 3,787  | 2,627 | unknown                                      | unknown                                        |
| <i>alr1206</i> | 1,893 | 4,975  | 2,627 | unknown                                      | unknown                                        |
| <i>asl0095</i> | 0,000 | 2,629  | 2,629 | unknown                                      | unknown                                        |
| <i>alr5251</i> | 4,803 | 12,814 | 2,668 | two-component response regulator             | regulatory functions                           |
| <i>all4198</i> | 7,836 | 21,000 | 2,680 | 50S ribosomal protein L15                    | ribosome component                             |
| <i>asr2565</i> | 0,000 | 2,707  | 2,707 | putative beta-ketoacyl synthase              | lipid metabolism                               |
| <i>alr2261</i> | 0,000 | 2,720  | 2,720 | unknown                                      | unknown                                        |
| <i>asl7258</i> | 0,000 | 2,747  | 2,747 | unknown                                      | unknown                                        |
| <i>alr1709</i> | 1,557 | 4,295  | 2,759 | alpha/beta hydrolase fold protein            | other enzymes                                  |
| <i>all1800</i> | 2,445 | 6,746  | 2,759 | TrkA domain-containing protein               | transport across membrane                      |
|                |       |        |       | similar to light-harvesting 1 (B870) complex |                                                |
| <i>all4462</i> | 0,965 | 2,662  | 2,759 | assembly protein PucC                        | bacteriochlorophyll                            |
|                |       |        |       | putative deoxyribonucleotide triphosphate    |                                                |
| <i>all5088</i> | 2,371 | 6,540  | 2,759 | pyrorophosphatase                            | nucleotide transport and metabolism            |
| <i>all3570</i> | 2,747 | 7,579  | 2,759 | inorganic pyrophosphatase; Ppa               | phosphorilation                                |
| <i>all3310</i> | 0,668 | 1,843  | 2,759 | TonB-dependent receptor                      | transport across membrane                      |

|                |        |         |       |                                                |                                           |
|----------------|--------|---------|-------|------------------------------------------------|-------------------------------------------|
| <i>all2724</i> | 2,552  | 7,040   | 2,759 | unknown                                        | unknown                                   |
| <i>all8503</i> | 0,000  | 2,832   | 2,832 | unknown                                        | unknown                                   |
| <i>all1886</i> | 2,203  | 6,251   | 2,837 | unknown                                        | unknown                                   |
| <i>alr2125</i> | 5,242  | 15,025  | 2,866 | unknown                                        | unknown                                   |
| <i>asr7257</i> | 0,000  | 2,876   | 2,876 | unknown                                        | unknown                                   |
| <i>all1164</i> | 42,291 | 121,739 | 2,879 | unknown                                        | unknown                                   |
| <i>all1456</i> | 2,327  | 6,726   | 2,890 | nitrogen fixation protein NifU                 | nitrogen fixation                         |
| <i>alr1982</i> | 0,000  | 2,894   | 2,894 | glucokinase                                    | glycolysis                                |
| <i>all8062</i> | 2,856  | 8,323   | 2,914 | unknown                                        | unknown                                   |
|                |        |         |       | chromosome partitioning protein, ParA family   |                                           |
| <i>alr8006</i> | 3,256  | 9,533   | 2,928 | ATPase                                         | nucleoproteins                            |
| <i>alr1722</i> | 0,000  | 2,950   | 2,950 | probable oxidoreductase                        | redox reactions                           |
| <i>all3181</i> | 2,892  | 8,548   | 2,956 | unknown                                        | unknown                                   |
| <i>asr8042</i> | 0,000  | 2,969   | 2,969 | putative GTP binding protein EngA              | other enzymes                             |
| <i>all0311</i> | 0,000  | 2,969   | 2,969 | unknown                                        | unknown                                   |
| <i>all2126</i> | 0,000  | 2,969   | 2,969 | unknown                                        | unknown                                   |
| <i>all2919</i> | 0,000  | 2,993   | 2,993 | ferredoxin                                     | electron transport chain                  |
| <i>all8080</i> | 6,749  | 20,214  | 2,995 | unknown                                        | unknown                                   |
| <i>alr3512</i> | 0,000  | 3,017   | 3,017 | dihydroneopterin aldolase                      | vitamin biosynthesis                      |
| <i>all3161</i> | 2,520  | 7,680   | 3,048 | cadmium-transporting ATPase                    | transport across membrane                 |
| <i>all2621</i> | 0,000  | 3,137   | 3,137 | transcriptional regulator                      | regulatory functions                      |
| <i>alr3577</i> | 0,000  | 3,146   | 3,146 | unknown                                        | unknown                                   |
| <i>alr1313</i> | 1,608  | 5,070   | 3,153 | 3-isopropylmalate dehydrogenase; LeuB          | amino acids biosynthesis and metabolism   |
| <i>all4012</i> | 2,538  | 8,002   | 3,153 | chorismate mutase                              | amino acids biosynthesis and metabolism   |
| <i>all7099</i> | 1,134  | 3,574   | 3,153 | HNH endonuclease                               | DNA degradation and modification          |
| <i>all7179</i> | 1,105  | 3,484   | 3,153 | SigG                                           | RNA synthesis and modification            |
| <i>all2638</i> | 0,283  | 0,893   | 3,153 | glutamate-1-semialdehyde aminotransferase      | tetrapyrrole biosynthesis pathway         |
| <i>alr3273</i> | 0,316  | 0,998   | 3,153 | twin-arginine translocation pathway signal     | transport across membrane                 |
| <i>all2767</i> | 1,134  | 3,574   | 3,153 | unknown                                        | unknown                                   |
| <i>alr4015</i> | 0,885  | 2,789   | 3,153 | unknown                                        | unknown                                   |
| <i>alr7587</i> | 0,257  | 0,811   | 3,153 | unknown                                        | unknown                                   |
|                |        |         |       |                                                | aminoacyl-tRNA synthetases and tRNA       |
| <i>alr1018</i> | 0,502  | 1,583   | 3,153 | Glu-tRNA(Gln) amidotransferase subunit A       | modification                              |
|                |        |         |       |                                                | chlorophyll catabolism, developmentally   |
| <i>all2097</i> | 0,234  | 0,736   | 3,153 | cell death suppressor protein                  | programmed death                          |
|                |        |         |       | cobalamin biosynthesis precorrin-2             |                                           |
| <i>all0455</i> | 0,497  | 1,566   | 3,153 | methyltransferase                              | cobalamin, heme, phycobilin and porphyrin |
| <i>alr4932</i> | 0,534  | 1,683   | 3,153 | DNA polymerase III gamma and tau subunits      | DNA replication, recombination and repair |
| <i>alr2075</i> | 0,813  | 2,562   | 3,153 | recombinase                                    | DNA replication, recombination and repair |
| <i>all1371</i> | 0,487  | 1,534   | 3,153 | polyphosphate glucokinase                      | glycolysis                                |
| <i>all4871</i> | 0,405  | 1,278   | 3,153 | putative phospholipid/glycerol acyltransferase | lipid metabolism                          |
| <i>asr1309</i> | 4,549  | 14,342  | 3,153 | NifU like protein                              | nitrogen fixation                         |

|                |       |       |       |                                                |                                                |
|----------------|-------|-------|-------|------------------------------------------------|------------------------------------------------|
| <i>all1432</i> | 0,923 | 2,910 | 3,153 | putative molybdenum cofactor biosynthesis      | nitrogen fixation                              |
| <i>all0250</i> | 2,115 | 6,669 | 3,153 | metallophosphoesterase                         | other enzymes                                  |
| <i>all4946</i> | 0,463 | 1,461 | 3,153 | possible methyltransferase type 11             | other enzymes                                  |
| <i>alr7101</i> | 0,340 | 1,073 | 3,153 | WD-repeat protein                              | other enzymes                                  |
| <i>all2753</i> | 0,426 | 1,343 | 3,153 | possible alpha/beta hydrolase fold protein     | other enzymes                                  |
| <i>alr4993</i> | 1,526 | 4,812 | 3,153 | possible NUDIX hydrolase                       | other enzymes                                  |
| <i>all2221</i> | 0,233 | 0,735 | 3,153 | phosphonate metabolism protein PhnM            | phosphonate metabolism                         |
| <i>all3776</i> | 1,507 | 4,750 | 3,153 | FHA domain protein                             | regulatory functions                           |
| <i>alr0344</i> | 0,293 | 0,924 | 3,153 | serine/threonine kinase                        | regulatory functions                           |
| <i>asl0125</i> | 2,407 | 7,590 | 3,153 | transcriptional regulator                      | regulatory functions                           |
| <i>all4726</i> | 0,314 | 0,990 | 3,153 | two-component sensor histidine kinase          | regulatory functions                           |
| <i>asl3726</i> | 1,946 | 6,135 | 3,153 | CAB/ELIP/HLIP superfamily                      | resistance, adaptations to atypical conditions |
| <i>all4092</i> | 1,007 | 3,173 | 3,153 | heat shock protein DnaJ-like                   | resistance, adaptations to atypical conditions |
| <i>asl0779</i> | 1,717 | 5,413 | 3,153 | proteinase inhibitor I4, serpin                | resistance, adaptations to atypical conditions |
| <i>alr3407</i> | 1,156 | 3,645 | 3,153 | similar to abortive phage resistance protein   | resistance, adaptations to atypical conditions |
| <i>rrn5Sc</i>  | 2,944 | 9,280 | 3,153 | 5S rRNA                                        | ribosome component                             |
| <i>alr1117</i> | 1,424 | 4,489 | 3,153 | glycosyl transferase group 1                   | sugars                                         |
| <i>alr3424</i> | 2,091 | 6,593 | 3,153 | GDP-mannose 4,6-dehydratase                    | sugars                                         |
| <i>all3396</i> | 1,091 | 3,440 | 3,153 | sulfur-regulated protein SrpB                  | sulfur-responsive protein                      |
| <i>alr1312</i> | 1,796 | 5,663 | 3,153 | tRNA-i(6) A37 modification enzyme MiaB         | translation                                    |
| <i>alr3944</i> | 1,156 | 3,645 | 3,153 | cobalt transport protein CbiN                  | transport across membrane                      |
| <i>all2113</i> | 0,225 | 0,711 | 3,153 | Na <sup>+</sup> /H <sup>+</sup> antiporter     | transport across membrane                      |
| <i>alr7093</i> | 1,112 | 3,506 | 3,153 | periplasmic divalent cation tolerance protein  | transport across membrane                      |
|                |       |       |       | phosphonate ABC transporter, phosphate-binding |                                                |
| <i>all8089</i> | 0,373 | 1,176 | 3,153 | protein                                        | transport across membrane                      |
| <i>all3151</i> | 1,150 | 3,627 | 3,153 | potassium-transporting ATPase C chain          | transport across membrane                      |
| <i>all3534</i> | 0,407 | 1,283 | 3,153 | probable potassium efflux transporter          | transport across membrane                      |
| <i>alr1633</i> | 0,741 | 2,335 | 3,153 | sulfate permease                               | transport across membrane                      |
| <i>alr7386</i> | 1,145 | 3,609 | 3,153 | transposase                                    | transposon-related functions                   |
| <i>all2066</i> | 1,366 | 4,305 | 3,153 | transposase                                    | transposon-related functions                   |
| <i>all7244</i> | 1,366 | 4,305 | 3,153 | transposase                                    | transposon-related functions                   |
| <i>all7115</i> | 0,856 | 2,700 | 3,153 | transposase                                    | transposon-related functions                   |
| <i>asr3686</i> | 2,994 | 9,439 | 3,153 | unknown                                        | unknown                                        |
| <i>all0313</i> | 2,104 | 6,633 | 3,153 | unknown                                        | unknown                                        |
| <i>alr2872</i> | 2,104 | 6,633 | 3,153 | unknown                                        | unknown                                        |
| <i>asr4321</i> | 1,645 | 5,185 | 3,153 | unknown                                        | unknown                                        |
| <i>all4144</i> | 1,629 | 5,136 | 3,153 | unknown                                        | unknown                                        |
| <i>asr2668</i> | 1,622 | 5,113 | 3,153 | unknown                                        | unknown                                        |
| <i>all2441</i> | 1,262 | 3,980 | 3,153 | unknown                                        | unknown                                        |
| <i>asr0461</i> | 1,204 | 3,795 | 3,153 | unknown                                        | unknown                                        |
| <i>alr2527</i> | 1,145 | 3,609 | 3,153 | unknown                                        | unknown                                        |
| <i>alr7264</i> | 1,052 | 3,316 | 3,153 | unknown                                        | unknown                                        |



|                |       |       |       |                                                              |                                                          |
|----------------|-------|-------|-------|--------------------------------------------------------------|----------------------------------------------------------|
| <i>all0337</i> | 0,957 | 3,017 | 3,153 | unknown                                                      | unknown                                                  |
| <i>alr1917</i> | 0,859 | 2,707 | 3,153 | unknown                                                      | unknown                                                  |
| <i>alr1356</i> | 0,817 | 2,574 | 3,153 | unknown                                                      | unknown                                                  |
| <i>all3318</i> | 0,778 | 2,454 | 3,153 | unknown                                                      | unknown                                                  |
| <i>alr2345</i> | 0,628 | 1,979 | 3,153 | unknown                                                      | unknown                                                  |
| <i>all0350</i> | 0,624 | 1,969 | 3,153 | unknown                                                      | unknown                                                  |
| <i>alr0194</i> | 0,602 | 1,897 | 3,153 | unknown                                                      | unknown                                                  |
| <i>all8538</i> | 0,602 | 1,897 | 3,153 | unknown                                                      | unknown                                                  |
| <i>alr5205</i> | 0,501 | 1,580 | 3,153 | unknown                                                      | unknown                                                  |
| <i>alr1233</i> | 0,422 | 1,329 | 3,153 | unknown                                                      | unknown                                                  |
| <i>alr3472</i> | 0,418 | 1,319 | 3,153 | unknown                                                      | unknown                                                  |
| <i>all5213</i> | 0,396 | 1,248 | 3,153 | unknown                                                      | unknown                                                  |
| <i>all8554</i> | 0,348 | 1,096 | 3,153 | unknown                                                      | unknown                                                  |
| <i>all1477</i> | 0,268 | 0,846 | 3,153 | unknown                                                      | unknown                                                  |
| <i>all5114</i> | 0,254 | 0,801 | 3,153 | unknown                                                      | unknown                                                  |
| <i>all2793</i> | 0,171 | 0,540 | 3,153 | unknown                                                      | unknown                                                  |
| <i>alr3588</i> | 0,128 | 0,405 | 3,153 | unknown                                                      | unknown                                                  |
| <i>asl0716</i> | 2,162 | 6,817 | 3,153 | unknown                                                      | unknown                                                  |
| <i>all0025</i> | 1,589 | 5,008 | 3,153 | unknown                                                      | unknown                                                  |
| <i>all3581</i> | 1,424 | 4,489 | 3,153 | unknown                                                      | unknown                                                  |
| <i>alr2537</i> | 1,162 | 3,663 | 3,153 | unknown                                                      | unknown                                                  |
| <i>all3616</i> | 1,112 | 3,506 | 3,153 | unknown                                                      | unknown                                                  |
| <i>all7193</i> | 0,865 | 2,727 | 3,153 | unknown                                                      | unknown                                                  |
| <i>all1123</i> | 0,712 | 2,245 | 3,153 | unknown                                                      | unknown                                                  |
| <i>alr0761</i> | 0,703 | 2,218 | 3,153 | unknown                                                      | unknown                                                  |
| <i>all1969</i> | 0,577 | 1,818 | 3,153 | unknown                                                      | unknown                                                  |
| <i>alr7216</i> | 0,446 | 1,405 | 3,153 | unknown                                                      | unknown                                                  |
| <i>all3163</i> | 0,336 | 1,058 | 3,153 | unknown                                                      | unknown                                                  |
| <i>alr7543</i> | 0,247 | 0,778 | 3,153 | unknown                                                      | unknown                                                  |
| <i>alr5007</i> | 0,518 | 1,632 | 3,153 | similar to cell death suppressor protein Lls1                | chlorophyll catabolism, developmentally programmed death |
| <i>alr3224</i> | 0,481 | 1,518 | 3,153 | site-specific recombinase (xisC)-like                        | heterocyst differentiation                               |
| <i>all5179</i> | 0,528 | 1,666 | 3,153 | O-methyltransferase                                          | other enzymes                                            |
| <i>alr3742</i> | 0,323 | 1,020 | 3,153 | photosystem II protein D1                                    | photosynthesis                                           |
| <i>all5288</i> | 0,536 | 1,689 | 3,153 | N-(5'-phosphoribosyl)anthranilate isomerase                  | purine/pyrimidine biosynthesis and metabolism            |
| <i>alr4551</i> | 2,399 | 7,564 | 3,153 | transcriptional regulator                                    | regulatory functions                                     |
| <i>alr0820</i> | 0,519 | 1,636 | 3,153 | sun protein                                                  | RNA synthesis and modification                           |
| <i>alr2679</i> | 0,330 | 1,039 | 3,153 | polyketide synthase                                          | siderophore/cyanotoxin biosynthesis                      |
| <i>all4026</i> | 0,137 | 0,431 | 3,153 | TonB-dependent receptor                                      | transport across membrane                                |
| <i>all0917</i> | 0,414 | 1,305 | 3,153 | ABC transporter permease protein                             | transport across membrane                                |
| <i>all0371</i> | 0,276 | 0,870 | 3,153 | probable integral membrane efflux protein                    | transport across membrane                                |
| <i>all1837</i> | 1,057 | 3,331 | 3,153 | putative monovalent cation/H <sup>+</sup> antiporter subunit | transport across membrane                                |

|                |        |        |       | B                                             |                                                         |
|----------------|--------|--------|-------|-----------------------------------------------|---------------------------------------------------------|
| <i>alr0190</i> | 0,361  | 1,140  | 3,153 | ABC transporter, ATP-binding protein          | transport across membrane                               |
| <i>all4303</i> | 1,637  | 5,160  | 3,153 | pentapeptide repeat-containing protein        | unknown                                                 |
| <i>alr8005</i> | 1,637  | 5,160  | 3,153 | unknown                                       | unknown                                                 |
| <i>alr2496</i> | 1,469  | 4,630  | 3,153 | unknown                                       | unknown                                                 |
| <i>alr4810</i> | 1,102  | 3,473  | 3,153 | unknown                                       | unknown                                                 |
| <i>alr0519</i> | 1,071  | 3,377  | 3,153 | unknown                                       | unknown                                                 |
| <i>alr4134</i> | 0,942  | 2,969  | 3,153 | unknown                                       | unknown                                                 |
| <i>alr1125</i> | 0,919  | 2,899  | 3,153 | unknown                                       | unknown                                                 |
| <i>alr0892</i> | 0,871  | 2,747  | 3,153 | unknown                                       | unknown                                                 |
| <i>alr7088</i> | 0,784  | 2,471  | 3,153 | unknown                                       | unknown                                                 |
| <i>alr1215</i> | 0,548  | 1,728  | 3,153 | unknown                                       | unknown                                                 |
| <i>alr4151</i> | 0,528  | 1,666  | 3,153 | unknown                                       | unknown                                                 |
| <i>alr3434</i> | 0,388  | 1,223  | 3,153 | unknown                                       | unknown                                                 |
| <i>alr1329</i> | 0,248  | 0,782  | 3,153 | unknown                                       | unknown                                                 |
| <i>asr7385</i> | 0,000  | 3,173  | 3,173 | transposase                                   | transposon-related functions                            |
| <i>alr0553</i> | 0,000  | 3,229  | 3,229 | transposase                                   | transposon-related functions                            |
| <i>alr3508</i> | 0,000  | 3,258  | 3,258 | unknown                                       | unknown                                                 |
| <i>asr1907</i> | 0,000  | 3,287  | 3,287 | unknown                                       | unknown                                                 |
| <i>all5185</i> | 1,832  | 6,135  | 3,350 | mercuric reductase                            | detoxification                                          |
| <i>alr4268</i> | 2,492  | 8,417  | 3,378 | putative dihydroflavonol 4-reductase          | anthocyanin biosynthesis                                |
| <i>alr1514</i> | 0,000  | 3,408  | 3,408 | unknown                                       | unknown                                                 |
| <i>asr2605</i> | 0,000  | 3,408  | 3,408 | unknown                                       | unknown                                                 |
| <i>asr8053</i> | 0,000  | 3,408  | 3,408 | unknown                                       | unknown                                                 |
| <i>asr3089</i> | 7,699  | 26,294 | 3,415 | transglycosylase-associated protein           | membrane component                                      |
| <i>alr0054</i> | 1,327  | 4,601  | 3,468 | peptidase S13, D-Ala-D-Ala carboxipeptidase C | cell wall/membrane biogenesis                           |
| <i>asr3605</i> | 0,000  | 3,473  | 3,473 | trigger factor                                | ribosome associated molecular chaperone, protein export |
| <i>all8043</i> | 16,471 | 58,275 | 3,538 | unknown                                       | unknown                                                 |
| <i>asl0294</i> | 0,000  | 3,540  | 3,540 | unknown                                       | unknown                                                 |
| <i>alr2948</i> | 1,390  | 4,930  | 3,547 | zinc-containing alcohol dehydrogenase         | energy production and conversion                        |
| <i>alr4803</i> | 3,620  | 12,841 | 3,547 | 2-hydroxyhepta-2,4-diene-1,7-dioate isomerase | amino acids biosynthesis and metabolism                 |
| <i>alr8527</i> | 0,000  | 3,645  | 3,645 | unknown                                       | unknown                                                 |
| <i>alr2927</i> | 2,634  | 9,687  | 3,678 | peptidase                                     | degradation of proteins, peptides, and glycopeptides    |
| <i>all4286</i> | 0,900  | 3,312  | 3,678 | 3-oxoacyl-[acyl-carrier-protein] synthase     | lipid metabolism                                        |
| <i>alr2945</i> | 0,699  | 2,572  | 3,678 | probable orotate phosphoribosyltransferase    | purine/pyrimidine biosynthesis and metabolism           |
| <i>asl0319</i> | 3,936  | 14,476 | 3,678 | unknown                                       | unknown                                                 |
| <i>alr1654</i> | 1,068  | 3,928  | 3,678 | unknown                                       | unknown                                                 |
| <i>asl1962</i> | 0,000  | 3,718  | 3,718 | unknown                                       | unknown                                                 |
| <i>all2689</i> | 0,000  | 3,782  | 3,782 | type I restriction enzyme, modification chain | DNA replication, recombination and repair               |
| <i>all0050</i> | 1,687  | 6,383  | 3,783 | unknown                                       | unknown                                                 |

|                |        |        |       |                                                       |                                                          |
|----------------|--------|--------|-------|-------------------------------------------------------|----------------------------------------------------------|
| <i>asl0260</i> | 15,718 | 60,173 | 3,828 | unknown                                               | unknown                                                  |
| <i>all1995</i> | 1,052  | 4,145  | 3,941 | phosphoribosyltransferase                             | other enzymes                                            |
| <i>alr4582</i> | 1,350  | 5,320  | 3,941 | adenine phosphoribosyltransferase                     | salvage pathways                                         |
| <i>all1647</i> | 0,236  | 0,931  | 3,941 | peptide synthetase                                    | siderophore/cyanotoxin biosynthesis                      |
| <i>all5184</i> | 1,000  | 3,941  | 3,941 | Mg <sup>2+</sup> transport protein                    | transport across membrane                                |
| <i>asr4707</i> | 2,883  | 11,362 | 3,941 | unknown                                               | unknown                                                  |
| <i>all3585</i> | 0,837  | 3,299  | 3,941 | unknown                                               | unknown                                                  |
| <i>all5137</i> | 0,647  | 2,549  | 3,941 | probable peptidase C14, caspase catalytic subunit P20 | degradation of proteins, peptides, and glycopeptides     |
| <i>alr0799</i> | 2,162  | 8,521  | 3,941 | glutaredoxin-related protein                          | detoxification                                           |
| <i>all1032</i> | 1,599  | 6,303  | 3,941 | putative acetyltransferase                            | other enzymes                                            |
| <i>alr3356</i> | 1,297  | 5,113  | 3,941 | similar to phytochrome                                | regulatory functions                                     |
| <i>alr3423</i> | 4,734  | 18,654 | 3,941 | similar to anti-sigma-B factor                        | RNA synthesis and modification                           |
| <i>alr8015</i> | 0,288  | 1,133  | 3,941 | probable ATPase                                       | transport across membrane                                |
| <i>alr0992</i> | 0,496  | 1,954  | 3,941 | ammonium transporter                                  | transport across membrane                                |
| <i>alr5330</i> | 0,871  | 3,434  | 3,941 | unknown                                               | unknown                                                  |
| <i>all1902</i> | 1,390  | 5,478  | 3,941 | unknown                                               | unknown                                                  |
| <i>alr8034</i> | 6,694  | 26,750 | 3,996 | similar to mobilization protein TraI                  | plasmid mobilization                                     |
| <i>asl4994</i> | 0,000  | 4,045  | 4,045 | similar to circadian clock protein KaiC               | regulatory functions                                     |
| <i>asl4146</i> | 0,000  | 4,183  | 4,183 | sulfiredoxin                                          | detoxification                                           |
| <i>asl0814</i> | 0,000  | 4,183  | 4,183 | unknown                                               | unknown                                                  |
| <i>asl4395</i> | 0,000  | 4,183  | 4,183 | unknown                                               | unknown                                                  |
| <i>alr7305</i> | 0,861  | 3,618  | 4,204 | transposase                                           | transposon-related functions                             |
| <i>alr2014</i> | 2,320  | 9,751  | 4,204 | unknown                                               | unknown                                                  |
| <i>asl8072</i> | 0,000  | 4,280  | 4,280 | transcriptional regulator                             | regulatory functions                                     |
| <i>alr0149</i> | 0,000  | 4,280  | 4,280 | unknown                                               | unknown                                                  |
| <i>asr3657</i> | 0,000  | 4,280  | 4,280 | unknown                                               | unknown                                                  |
| <i>asr3961</i> | 0,000  | 4,331  | 4,331 | unknown                                               | unknown                                                  |
| <i>alr0477</i> | 1,783  | 7,728  | 4,335 | phospho-N-acetylmuramoyl-pentapeptide-transferase     | cell wall/membrane biogenesis                            |
| <i>alr0301</i> | 1,123  | 4,867  | 4,335 | unknown                                               | unknown                                                  |
| <i>asl4362</i> | 0,000  | 4,435  | 4,435 | tRNA (guanine-N1)-methyltransferase                   | RNA synthesis and modification                           |
| <i>alr3883</i> | 0,000  | 4,435  | 4,435 | 2-C-methyl-D-erythritol 2,4-cyclodiphosphate synthase | terpenoid biosynthesis                                   |
| <i>all7116</i> | 0,000  | 4,526  | 4,526 | unknown                                               | unknown                                                  |
| <i>asl4918</i> | 0,000  | 4,545  | 4,545 | putative transposase                                  | transposon-related functions                             |
| <i>asr0941</i> | 0,000  | 4,601  | 4,601 | photosystem II protein PsbX                           | photosynthesis                                           |
| <i>asr1131</i> | 0,000  | 4,719  | 4,719 | signal transduction protein                           | regulatory functions                                     |
| <i>all7348</i> | 0,507  | 2,396  | 4,729 | lethal leaf-spot 1 homolog                            | chlorophyll catabolism, developmentally programmed death |
| <i>alr1450</i> | 0,254  | 1,200  | 4,729 | cytochrome P450                                       | electron transport chain                                 |
| <i>all2031</i> | 0,320  | 1,513  | 4,729 | cyclic nucleotide binding protein                     | regulatory functions                                     |

|                |       |        |       |                                                                                |                                                |
|----------------|-------|--------|-------|--------------------------------------------------------------------------------|------------------------------------------------|
| <i>alr1629</i> | 0,852 | 4,030  | 4,729 | transcriptional regulator                                                      | regulatory functions                           |
| <i>alr2731</i> | 0,383 | 1,810  | 4,729 | cytochrome c oxidase subunit II<br>similar to hemolysin export system membrane | respiration, oxidative phosphorylation         |
| <i>all7010</i> | 0,241 | 1,138  | 4,729 | fusion protein HlyD                                                            | transport across membrane                      |
| <i>alr5362</i> | 0,237 | 1,122  | 4,729 | sugar ABC transporter ATP binding protein                                      | transport across membrane                      |
| <i>all3371</i> | 0,871 | 4,121  | 4,729 | transposase                                                                    | transposon-related functions                   |
| <i>alr3388</i> | 1,134 | 5,361  | 4,729 | unknown                                                                        | unknown                                        |
| <i>all4508</i> | 1,134 | 5,361  | 4,729 | unknown                                                                        | unknown                                        |
| <i>alr2431</i> | 0,805 | 3,808  | 4,729 | unknown                                                                        | unknown                                        |
| <i>all2005</i> | 0,773 | 3,657  | 4,729 | unknown                                                                        | unknown                                        |
| <i>alr1301</i> | 0,531 | 2,510  | 4,729 | unknown                                                                        | unknown                                        |
| <i>all1340</i> | 0,531 | 2,510  | 4,729 | unknown                                                                        | unknown                                        |
| <i>all4737</i> | 0,521 | 2,465  | 4,729 | unknown                                                                        | unknown                                        |
| <i>all8516</i> | 0,514 | 2,432  | 4,729 | unknown                                                                        | unknown                                        |
| <i>asl3923</i> | 2,162 | 10,225 | 4,729 | unknown                                                                        | unknown                                        |
| <i>alr4513</i> | 0,631 | 2,985  | 4,729 | unknown                                                                        | unknown                                        |
| <i>alr4919</i> | 0,176 | 0,833  | 4,729 | unknown                                                                        | unknown                                        |
| <i>all2162</i> | 0,155 | 0,733  | 4,729 | methyl-accepting chemotaxis protein                                            | chemotaxis and cell motility                   |
| <i>all5371</i> | 0,891 | 4,215  | 4,729 | alkylhydroperoxidase AhpD                                                      | detoxification                                 |
| <i>alr3100</i> | 0,768 | 3,633  | 4,729 | holliday junction resolvase YqgF                                               | DNA replication, recombination and repair      |
| <i>alr2873</i> | 0,348 | 1,643  | 4,729 | glycerate kinase                                                               | glycine/serine/threonine/glyoxylate metabolism |
| <i>all2566</i> | 0,339 | 1,605  | 4,729 | glyceraldehyde-3-phosphate dehydrogenase                                       | glycolysis                                     |
| <i>all1455</i> | 0,789 | 3,731  | 4,729 | nitrogenase iron protein NifH                                                  | nitrogen fixation                              |
| <i>alr2189</i> | 0,341 | 1,615  | 4,729 | regulatory protein                                                             | regulatory functions                           |
| <i>alr4485</i> | 0,868 | 4,105  | 4,729 | ABC transporter, permease protein                                              | transport across membrane                      |
| <i>alr7511</i> | 0,323 | 1,530  | 4,729 | integrase-recombinase protein                                                  | transposon-related functions                   |
| <i>all3256</i> | 0,868 | 4,105  | 4,729 | pentapeptide-repeat containing protein                                         | unknown                                        |
| <i>asl7217</i> | 2,883 | 13,634 | 4,729 | unknown                                                                        | unknown                                        |
| <i>alr1810</i> | 1,021 | 4,829  | 4,729 | unknown                                                                        | unknown                                        |
| <i>alr0896</i> | 0,834 | 3,944  | 4,729 | unknown                                                                        | unknown                                        |
| <i>alr2947</i> | 0,811 | 3,835  | 4,729 | unknown                                                                        | unknown                                        |
| <i>all5029</i> | 0,739 | 3,495  | 4,729 | unknown                                                                        | unknown                                        |
| <i>alr2823</i> | 0,447 | 2,116  | 4,729 | unknown                                                                        | unknown                                        |
| <i>asr0581</i> | 0,000 | 4,781  | 4,781 | unknown                                                                        | unknown                                        |
| <i>asl2455</i> | 0,000 | 5,185  | 5,185 | protein secretion chaperonin CsaA                                              | heat shock proteins and chaperones             |
| <i>all3319</i> | 0,000 | 5,467  | 5,467 | unknown                                                                        | unknown                                        |
| <i>asl1187</i> | 0,000 | 5,494  | 5,494 | surface antigen variable number                                                | membrane component                             |
| <i>all0315</i> | 1,717 | 9,474  | 5,517 | transposase                                                                    | transposon-related functions                   |
| <i>alr4567</i> | 1,156 | 6,378  | 5,517 | transcriptional regulator                                                      | regulatory functions                           |
| <i>all8041</i> | 5,560 | 30,676 | 5,517 | unknown                                                                        | unknown                                        |
| <i>asl3656</i> | 0,000 | 5,577  | 5,577 | unknown                                                                        | unknown                                        |
| <i>all8067</i> | 1,460 | 8,283  | 5,675 | unknown                                                                        | unknown                                        |

|                |       |        |       |                                            |                                               |
|----------------|-------|--------|-------|--------------------------------------------|-----------------------------------------------|
| <i>all8037</i> | 6,322 | 36,126 | 5,714 | unknown                                    | unknown                                       |
| <i>all4750</i> | 1,530 | 8,841  | 5,780 | two-component response regulator           | regulatory functions                          |
| <i>asr5364</i> | 0,000 | 5,843  | 5,843 | unknown                                    | unknown                                       |
| <i>asr8054</i> | 0,000 | 6,204  | 6,204 | unknown                                    | unknown                                       |
| <i>asr4676</i> | 0,000 | 6,239  | 6,239 | unknown                                    | unknown                                       |
| <i>all3898</i> | 0,423 | 2,667  | 6,305 | 2-hydroxy-6-ketono-2,4-dienoate hydrolase  | catabolic pathways                            |
| <i>all1681</i> | 0,350 | 2,204  | 6,305 | aspartate carbamoyltransferase             | purine/pyrimidine biosynthesis and metabolism |
| <i>all5120</i> | 0,178 | 1,124  | 6,305 | unknown                                    | unknown                                       |
| <i>all1847</i> | 0,611 | 3,855  | 6,305 | CheB methyltransferase                     | chemotaxis and cell motility                  |
| <i>alr3195</i> | 0,475 | 2,993  | 6,305 | glutathione S-transferase                  | detoxification                                |
| <i>all3135</i> | 0,383 | 2,414  | 6,305 | succinoglycan biosynthesis ketolase ExoV   | exopolysaccharide biosynthesis                |
| <i>all3036</i> | 1,007 | 6,347  | 6,305 | Nitrate transport permease                 | nitrogen metabolism                           |
| <i>alr3666</i> | 0,417 | 2,629  | 6,305 | urease accessory protein D                 | nitrogen metabolism                           |
| <i>alr0894</i> | 0,482 | 3,042  | 6,305 | cyclase/dehydrase                          | polyketide biosynthesis                       |
| <i>all0322</i> | 0,306 | 1,927  | 6,305 | sulfate-binding protein SbpA               | transport across membrane                     |
| <i>alr2168</i> | 0,295 | 1,859  | 6,305 | transposase                                | transposon-related functions                  |
| <i>all4886</i> | 0,763 | 4,812  | 6,305 | unknown                                    | unknown                                       |
| <i>all0244</i> | 0,667 | 4,207  | 6,305 | unknown                                    | unknown                                       |
| <i>alr2783</i> | 0,374 | 2,360  | 6,305 | unknown                                    | unknown                                       |
| <i>alr1733</i> | 1,091 | 6,881  | 6,305 | unknown                                    | unknown                                       |
| <i>alr4734</i> | 0,645 | 4,068  | 6,305 | unknown                                    | unknown                                       |
| <i>alr0034</i> | 0,364 | 2,294  | 6,305 | O-succinylbenzoic acid synthase; MenC      | vitamin biosynthesis                          |
| <i>asl0940</i> | 1,191 | 7,513  | 6,305 | YGGT-containing protein                    | membrane component                            |
| <i>all4400</i> | 0,912 | 5,752  | 6,305 | transposase                                | transposon-related functions                  |
| <i>alr4712</i> | 0,510 | 3,215  | 6,305 | unknown                                    | unknown                                       |
| <i>all8002</i> | 0,410 | 2,583  | 6,305 | unknown                                    | unknown                                       |
| <i>alr3382</i> | 0,000 | 6,535  | 6,535 | molybdenum cofactor biosynthesis protein C | coenzymes and cofactors                       |
| <i>alr1791</i> | 0,000 | 6,693  | 6,693 | putative transposase                       | transposon-related functions                  |
| <i>all7004</i> | 1,412 | 9,648  | 6,831 | transposase                                | transposon-related functions                  |
| <i>all8046</i> | 5,615 | 38,834 | 6,917 | unknown                                    | unknown                                       |
| <i>asl4753</i> | 0,000 | 6,946  | 6,946 | unknown                                    | unknown                                       |
| <i>all8047</i> | 9,907 | 70,276 | 7,094 | unknown                                    | unknown                                       |
| <i>asl1671</i> | 0,000 | 7,218  | 7,218 | unknown                                    | unknown                                       |
| <i>asl7509</i> | 0,000 | 7,564  | 7,564 | unknown                                    | unknown                                       |
| <i>all1474</i> | 0,345 | 2,723  | 7,882 | CRISPR-associated RAMP protein             | DNA replication, recombination and repair     |
| <i>alr3513</i> | 0,805 | 6,347  | 7,882 | Fe-S metabolism associated SufE            | Fe-S cluster biosynthesis                     |
| <i>all3765</i> | 0,263 | 2,073  | 7,882 | two-component hybrid sensor and regulator  | regulatory functions                          |
| <i>asr4653</i> | 1,914 | 15,087 | 7,882 | unknown                                    | unknown                                       |
| <i>alr2045</i> | 0,460 | 3,623  | 7,882 | Thioesterase                               | lipid metabolism                              |
| <i>alr3738</i> | 0,519 | 4,090  | 7,882 | Mo-dependent nitrogenase                   | nitrogen fixation                             |
| <i>all2127</i> | 0,516 | 4,063  | 7,882 | radical SAM, Fe-S containing enzyme        | other enzymes                                 |
| <i>all8035</i> | 4,246 | 33,465 | 7,882 | unknown                                    | unknown                                       |

|                |       |        |        |                                                     |                                                |
|----------------|-------|--------|--------|-----------------------------------------------------|------------------------------------------------|
| <i>alr0804</i> | 0,758 | 5,976  | 7,882  | unknown                                             | unknown                                        |
| <i>all8032</i> | 2,817 | 23,686 | 8,407  | unknown                                             | unknown                                        |
| <i>all8040</i> | 3,862 | 33,660 | 8,716  | unknown                                             | unknown                                        |
| <i>alr4996</i> | 0,000 | 8,765  | 8,765  | unknown                                             | unknown                                        |
| <i>all1649</i> | 0,074 | 0,703  | 9,458  | similar to polyketide synthase                      | siderophore/cyanotoxin biosynthesis            |
| <i>all0166</i> | 0,235 | 2,226  | 9,458  | aapha,alpha-trehalase                               | sugars                                         |
| <i>asl9022</i> | 1,441 | 13,634 | 9,458  | putative transposase                                | transposon-related functions                   |
| <i>alr1868</i> | 1,168 | 11,043 | 9,458  | unknown                                             | unknown                                        |
| <i>asl2299</i> | 0,000 | 9,816  | 9,816  | unknown                                             | unknown                                        |
| <i>asl8049</i> | 0,000 | 10,225 | 10,225 | unknown                                             | unknown                                        |
| <i>asl1777</i> | 0,000 | 10,827 | 10,827 | putative ATPase                                     | transport across membrane                      |
| <i>alr8066</i> | 0,417 | 4,601  | 11,035 | putative N-acetyltransferase                        | other enzymes                                  |
| <i>alr8060</i> | 1,287 | 16,232 | 12,611 | unknown                                             | unknown                                        |
| <i>all8087</i> | 0,351 | 4,422  | 12,611 | glycerate dehydrogenase                             | glycine/serine/threonine/glyoxylate metabolism |
| <i>alr3479</i> | 0,778 | 9,816  | 12,611 | similar to nitrogen regulation protein NtrR         | nitrogen metabolism                            |
| <i>all8039</i> | 2,507 | 33,876 | 13,512 | putative DNA primase                                | DNA replication, recombination and repair      |
| <i>all8044</i> | 1,123 | 15,928 | 14,187 | unknown                                             | unknown                                        |
| <i>alr8061</i> | 0,416 | 6,550  | 15,764 | unknown                                             | unknown                                        |
| <i>alr8058</i> | 1,734 | 30,069 | 17,340 | unknown                                             | unknown                                        |
| <i>asr8057</i> | 0,000 | 17,529 | 17,529 | unknown                                             | unknown                                        |
| <i>alr8059</i> | 0,000 | 19,642 | 19,642 | unknown                                             | unknown                                        |
| <i>all8038</i> | 1,219 | 26,912 | 22,069 | unknown                                             | unknown                                        |
| <i>alr8052</i> | 0,000 | 22,839 | 22,839 | putative cobalt ABC transporter ATP-binding protein | transport across membrane                      |
| <i>asl8050</i> | 0,000 | 23,007 | 23,007 | copy number control protein CopB                    | nucleoproteins                                 |
| <i>alr8056</i> | 0,878 | 20,758 | 23,645 | unknown                                             | unknown                                        |
| <i>alr8051</i> | 1,877 | 49,121 | 26,168 | unknown                                             | unknown                                        |
| <i>all8036</i> | 0,000 | 41,207 | 41,207 | unknown                                             | unknown                                        |

---

**Table C. Genes showing <2-fold change in expression in the *furA*-turning off strain AGcoaRFurA**

| ORF            | RPKM (WT) | RPKM (FurA <sup>-</sup> ) | Fold change |
|----------------|-----------|---------------------------|-------------|
| <i>all2409</i> | 1,996     | 0,000                     | -1,996      |
| <i>all4434</i> | 1,996     | 0,000                     | -1,996      |
| <i>alr5143</i> | 1,996     | 0,000                     | -1,996      |
| <i>all7594</i> | 1,996     | 0,000                     | -1,996      |
| <i>all4364</i> | 12,350    | 6,194                     | -1,994      |
| <i>all3288</i> | 4,884     | 2,449                     | -1,994      |
| <i>all3226</i> | 37,837    | 18,978                    | -1,994      |
| <i>all2192</i> | 9,842     | 4,936                     | -1,994      |
| <i>alr3406</i> | 5,536     | 2,777                     | -1,994      |
| <i>psbB</i>    | 228,027   | 114,404                   | -1,993      |
| <i>apcC</i>    | 345,206   | 173,387                   | -1,991      |
| <i>all1426</i> | 1,990     | 0,000                     | -1,990      |
| <i>all3866</i> | 1,990     | 0,000                     | -1,990      |
| <i>alr7063</i> | 1,987     | 0,000                     | -1,987      |
| <i>dnaK_3</i>  | 47,490    | 23,922                    | -1,985      |
| <i>alr3494</i> | 23,167    | 11,686                    | -1,982      |
| <i>all1541</i> | 11,583    | 5,843                     | -1,982      |
| <i>all5174</i> | 4,849     | 2,446                     | -1,982      |
| <i>psaD</i>    | 3762,206  | 1898,420                  | -1,982      |
| <i>psbD_1</i>  | 247,454   | 124,971                   | -1,980      |
| <i>all0195</i> | 1,979     | 0,000                     | -1,979      |
| <i>asl2383</i> | 1,979     | 0,000                     | -1,979      |
| <i>alr4783</i> | 1,979     | 0,000                     | -1,979      |
| <i>all7185</i> | 1,979     | 0,000                     | -1,979      |
| <i>psbE</i>    | 74,558    | 37,698                    | -1,978      |
| <i>all3054</i> | 9,103     | 4,606                     | -1,976      |
| <i>alr1890</i> | 17,946    | 9,081                     | -1,976      |
| <i>alr3400</i> | 16,766    | 8,495                     | -1,974      |
| <i>alr3414</i> | 25,541    | 12,942                    | -1,974      |
| <i>alr0740</i> | 6,423     | 3,254                     | -1,974      |
| <i>alr4404</i> | 30,698    | 15,554                    | -1,974      |
| <i>all0850</i> | 10,379    | 5,259                     | -1,974      |
| <i>alr7506</i> | 9,006     | 4,563                     | -1,974      |

|                |         |         |        |
|----------------|---------|---------|--------|
| <i>all1061</i> | 4,365   | 2,212   | -1,974 |
| <i>all4042</i> | 5,923   | 3,001   | -1,974 |
| <i>alr9024</i> | 5,923   | 3,001   | -1,974 |
| <i>alr4596</i> | 21,893  | 11,107  | -1,971 |
| <i>alr3561</i> | 21,494  | 10,911  | -1,970 |
| <i>all0854</i> | 32,318  | 16,434  | 1,967  |
| <i>desC_2</i>  | 12,656  | 6,436   | -1,967 |
| <i>alr5294</i> | 3,348   | 1,703   | -1,967 |
| <i>all1103</i> | 32,032  | 16,288  | -1,967 |
| <i>alr1728</i> | 8,901   | 4,540   | -1,961 |
| <i>all4752</i> | 12,066  | 6,154   | -1,961 |
| <i>petC_4</i>  | 1,957   | 0,000   | -1,957 |
| <i>alr3952</i> | 36,001  | 18,406  | -1,956 |
| <i>alr2338</i> | 5,745   | 2,937   | -1,956 |
| <i>all7245</i> | 32,624  | 16,691  | -1,955 |
| <i>all0887</i> | 1,946   | 0,000   | -1,946 |
| <i>asl1739</i> | 1,946   | 0,000   | -1,946 |
| <i>alr4649</i> | 1,946   | 0,000   | -1,946 |
| <i>asr7145</i> | 1,946   | 0,000   | -1,946 |
| <i>all7284</i> | 1,946   | 0,000   | -1,946 |
| <i>alr2717</i> | 23,978  | 12,325  | -1,945 |
| <i>all4252</i> | 46,704  | 24,050  | -1,942 |
| <i>coxA_1</i>  | 11,757  | 6,071   | -1,937 |
| <i>rbcS</i>    | 142,236 | 73,623  | -1,932 |
| <i>trpD_2</i>  | 1,930   | 0,000   | -1,930 |
| <i>tuf</i>     | 61,513  | 31,873  | -1,930 |
| <i>all1345</i> | 21,591  | 11,196  | -1,928 |
| <i>rbpA2</i>   | 88,693  | 46,014  | -1,928 |
| <i>alr0974</i> | 1,927   | 0,000   | -1,927 |
| <i>alr3353</i> | 66,129  | 34,344  | -1,925 |
| <i>pecC</i>    | 197,950 | 102,914 | -1,923 |
| <i>alr0975</i> | 1,922   | 0,000   | -1,922 |
| <i>alr4466</i> | 1,920   | 0,000   | -1,920 |
| <i>alr5230</i> | 1,919   | 0,000   | -1,919 |
| <i>asr1915</i> | 1,914   | 0,000   | -1,914 |
| <i>alr4650</i> | 1,914   | 0,000   | -1,914 |
| <i>asr7293</i> | 1,914   | 0,000   | -1,914 |
| <i>alr4550</i> | 114,937 | 60,074  | -1,913 |
| <i>alr2112</i> | 1,904   | 0,000   | -1,904 |
| <i>alr1652</i> | 4,042   | 2,124   | -1,903 |
| <i>alr3449</i> | 2,245   | 1,180   | -1,903 |
| <i>smpB</i>    | 2,245   | 1,180   | -1,903 |



|                |        |        |        |
|----------------|--------|--------|--------|
| <i>alr2536</i> | 2,210  | 1,161  | -1,903 |
| <i>alr0353</i> | 1,145  | 0,601  | -1,903 |
| <i>psaM</i>    | 34,174 | 17,957 | -1,903 |
| <i>ndhF_2</i>  | 24,625 | 12,939 | -1,903 |
| <i>alr4785</i> | 14,011 | 7,362  | -1,903 |
| <i>all7005</i> | 11,975 | 6,293  | -1,903 |
| <i>asl4369</i> | 11,062 | 5,812  | -1,903 |
| <i>alr4417</i> | 10,796 | 5,673  | -1,903 |
| <i>rpsQ</i>    | 8,543  | 4,489  | -1,903 |
| <i>asl8027</i> | 8,242  | 4,331  | -1,903 |
| <i>all1972</i> | 7,374  | 3,875  | -1,903 |
| <i>fmt</i>     | 6,127  | 3,220  | -1,903 |
| <i>all2091</i> | 6,081  | 3,195  | -1,903 |
| <i>all0047</i> | 5,926  | 3,114  | -1,903 |
| <i>alr3363</i> | 5,638  | 2,963  | -1,903 |
| <i>all3580</i> | 5,417  | 2,846  | -1,903 |
| <i>alr7102</i> | 5,417  | 2,846  | -1,903 |
| <i>alr3058</i> | 5,139  | 2,700  | -1,903 |
| <i>asl1513</i> | 4,934  | 2,592  | -1,903 |
| <i>all2395</i> | 4,712  | 2,476  | -1,903 |
| <i>all2096</i> | 4,549  | 2,390  | -1,903 |
| <i>alr3453</i> | 4,549  | 2,390  | -1,903 |
| <i>hetI</i>    | 4,351  | 2,286  | -1,903 |
| <i>alr0618</i> | 4,324  | 2,272  | -1,903 |
| <i>all0002</i> | 4,272  | 2,245  | -1,903 |
| <i>alr3361</i> | 3,992  | 2,098  | -1,903 |
| <i>all2976</i> | 3,936  | 2,068  | -1,903 |
| <i>asl8537</i> | 3,936  | 2,068  | -1,903 |
| <i>alr7192</i> | 3,914  | 2,057  | -1,903 |
| <i>all4580</i> | 3,903  | 2,051  | -1,903 |
| <i>asl1412</i> | 3,807  | 2,001  | -1,903 |
| <i>alr3126</i> | 3,799  | 1,996  | -1,903 |
| <i>alr0851</i> | 3,726  | 1,958  | -1,903 |
| <i>alr2988</i> | 3,707  | 1,948  | -1,903 |
| <i>alr3050</i> | 3,611  | 1,897  | -1,903 |
| <i>gatC</i>    | 3,611  | 1,897  | -1,903 |
| <i>alr7524</i> | 3,611  | 1,897  | -1,903 |
| <i>all1641</i> | 3,602  | 1,893  | -1,903 |
| <i>alr2629</i> | 3,368  | 1,770  | -1,903 |
| <i>alr3452</i> | 3,368  | 1,770  | -1,903 |
| <i>all1021</i> | 3,333  | 1,751  | -1,903 |
| <i>all2620</i> | 3,261  | 1,714  | -1,903 |

|                |       |       |        |
|----------------|-------|-------|--------|
| <i>alr2944</i> | 2,907 | 1,527 | -1,903 |
| <i>alr0302</i> | 2,883 | 1,515 | -1,903 |
| <i>alr7634</i> | 2,848 | 1,496 | -1,903 |
| <i>all0439</i> | 2,769 | 1,455 | -1,903 |
| <i>alr4066</i> | 2,674 | 1,405 | -1,903 |
| <i>all9002</i> | 2,416 | 1,269 | -1,903 |
| <i>all1943</i> | 2,335 | 1,227 | -1,903 |
| <i>alr1045</i> | 2,304 | 1,211 | -1,903 |
| <i>aphA</i>    | 2,286 | 1,201 | -1,903 |
| <i>all2286</i> | 2,060 | 1,083 | -1,903 |
| <i>all0827</i> | 1,968 | 1,034 | -1,903 |
| <i>alr1341</i> | 1,946 | 1,023 | -1,903 |
| <i>alr0593</i> | 1,925 | 1,011 | -1,903 |
| <i>alr3752</i> | 1,904 | 1,000 | -1,903 |
| <i>alr1410</i> | 1,853 | 0,974 | -1,903 |
| <i>all2905</i> | 1,844 | 0,969 | -1,903 |
| <i>alr4536</i> | 1,806 | 0,949 | -1,903 |
| <i>all0168</i> | 1,692 | 0,889 | -1,903 |
| <i>alr1529</i> | 1,692 | 0,889 | -1,903 |
| <i>alr4095</i> | 1,614 | 0,848 | -1,903 |
| <i>alr0598</i> | 1,510 | 0,793 | -1,903 |
| <i>alr3904</i> | 1,497 | 0,787 | -1,903 |
| <i>alr0515</i> | 1,453 | 0,764 | -1,903 |
| <i>alr1183</i> | 1,342 | 0,705 | -1,903 |
| <i>all4461</i> | 1,302 | 0,684 | -1,903 |
| <i>alr5189</i> | 1,302 | 0,684 | -1,903 |
| <i>phnE_1</i>  | 1,274 | 0,669 | -1,903 |
| <i>all2989</i> | 1,238 | 0,650 | -1,903 |
| <i>alr2214</i> | 1,196 | 0,628 | -1,903 |
| <i>alr1997</i> | 1,164 | 0,611 | -1,903 |
| <i>alr3017</i> | 1,027 | 0,540 | -1,903 |
| <i>alr4494</i> | 0,984 | 0,517 | -1,903 |
| <i>alr3584</i> | 0,978 | 0,514 | -1,903 |
| <i>all7335</i> | 0,973 | 0,511 | -1,903 |
| <i>alr0838</i> | 0,927 | 0,487 | -1,903 |
| <i>alr2241</i> | 0,927 | 0,487 | -1,903 |
| <i>all5113</i> | 0,857 | 0,451 | -1,903 |
| <i>alr5202</i> | 0,815 | 0,428 | -1,903 |
| <i>moeA</i>    | 0,802 | 0,421 | -1,903 |
| <i>all7583</i> | 0,750 | 0,394 | -1,903 |
| <i>alr0557</i> | 0,587 | 0,308 | -1,903 |
| <i>alr0428</i> | 0,549 | 0,288 | -1,903 |

|                |        |        |        |
|----------------|--------|--------|--------|
| <i>all0167</i> | 0,380  | 0,199  | -1,903 |
| <i>all0432</i> | 0,378  | 0,199  | -1,903 |
| <i>all2647</i> | 0,322  | 0,169  | -1,903 |
| <i>all7607</i> | 28,109 | 14,770 | -1,903 |
| <i>asr2607</i> | 26,537 | 13,944 | -1,903 |
| <i>alr3801</i> | 26,189 | 13,761 | -1,903 |
| <i>hoxR</i>    | 25,020 | 13,147 | -1,903 |
| <i>recA</i>    | 24,461 | 12,853 | -1,903 |
| <i>typA</i>    | 21,123 | 11,099 | -1,903 |
| <i>alr4641</i> | 20,605 | 10,827 | -1,903 |
| <i>asr2985</i> | 19,460 | 10,225 | -1,903 |
| <i>alr2304</i> | 16,217 | 8,521  | -1,903 |
| <i>all4145</i> | 14,951 | 7,856  | -1,903 |
| <i>all4779</i> | 11,485 | 6,035  | -1,903 |
| <i>asl0551</i> | 11,120 | 5,843  | -1,903 |
| <i>all4342</i> | 9,937  | 5,221  | -1,903 |
| <i>all7355</i> | 8,407  | 4,417  | -1,903 |
| <i>all0085</i> | 8,194  | 4,305  | -1,903 |
| <i>alr1961</i> | 7,961  | 4,183  | -1,903 |
| <i>ribG</i>    | 7,682  | 4,036  | -1,903 |
| <i>alr2940</i> | 7,648  | 4,019  | -1,903 |
| <i>alr1921</i> | 7,298  | 3,835  | -1,903 |
| <i>radC</i>    | 7,178  | 3,772  | -1,903 |
| <i>all4272</i> | 6,504  | 3,418  | -1,903 |
| <i>asl1249</i> | 6,487  | 3,408  | -1,903 |
| <i>all0544</i> | 6,427  | 3,377  | -1,903 |
| <i>alr2954</i> | 5,742  | 3,017  | -1,903 |
| <i>asl0873</i> | 5,151  | 2,707  | -1,903 |
| <i>alr0821</i> | 4,969  | 2,611  | -1,903 |
| <i>asl2047</i> | 4,798  | 2,521  | -1,903 |
| <i>alr2049</i> | 4,520  | 2,375  | -1,903 |
| <i>asl4137</i> | 4,379  | 2,301  | -1,903 |
| <i>alr5352</i> | 4,298  | 2,258  | -1,903 |
| <i>alr7504</i> | 4,200  | 2,207  | -1,903 |
| <i>alr2774</i> | 4,097  | 2,153  | -1,903 |
| <i>alr4788</i> | 4,026  | 2,116  | -1,903 |
| <i>all1342</i> | 3,942  | 2,071  | -1,903 |
| <i>alr5147</i> | 3,908  | 2,054  | -1,903 |
| <i>all5043</i> | 3,881  | 2,039  | -1,903 |
| <i>alr0893</i> | 3,839  | 2,017  | -1,903 |
| <i>hetN</i>    | 3,649  | 1,917  | -1,903 |
| <i>all2876</i> | 3,604  | 1,894  | -1,903 |

|                |       |       |        |
|----------------|-------|-------|--------|
| <i>all4926</i> | 3,574 | 1,878 | -1,903 |
| <i>alr2881</i> | 3,325 | 1,747 | -1,903 |
| <i>alr4944</i> | 3,289 | 1,728 | -1,903 |
| <i>kaiB_1</i>  | 3,214 | 1,689 | -1,903 |
| <i>all0956</i> | 3,156 | 1,658 | -1,903 |
| <i>alr3645</i> | 3,046 | 1,600 | -1,903 |
| <i>alr0704</i> | 3,028 | 1,591 | -1,903 |
| <i>all0625</i> | 2,956 | 1,553 | -1,903 |
| <i>all5215</i> | 2,953 | 1,552 | -1,903 |
| <i>alr5260</i> | 2,944 | 1,547 | -1,903 |
| <i>all0591</i> | 2,825 | 1,484 | -1,903 |
| <i>all3626</i> | 2,825 | 1,484 | -1,903 |
| <i>alr1869</i> | 2,814 | 1,478 | -1,903 |
| <i>alr4270</i> | 2,802 | 1,472 | -1,903 |
| <i>alr3994</i> | 2,576 | 1,353 | -1,903 |
| <i>all3918</i> | 2,520 | 1,324 | -1,903 |
| <i>alr2694</i> | 2,351 | 1,235 | -1,903 |
| <i>alr1715</i> | 2,182 | 1,147 | -1,903 |
| <i>alr8001</i> | 2,169 | 1,140 | -1,903 |
| <i>all2706</i> | 2,123 | 1,115 | -1,903 |
| <i>all4284</i> | 2,110 | 1,109 | -1,903 |
| <i>glk</i>     | 2,042 | 1,073 | -1,903 |
| <i>all3160</i> | 2,037 | 1,070 | -1,903 |
| <i>alr7670</i> | 2,025 | 1,064 | -1,903 |
| <i>all1357</i> | 2,013 | 1,058 | -1,903 |
| <i>alr7326</i> | 2,013 | 1,058 | -1,903 |
| <i>alr7512</i> | 2,002 | 1,052 | -1,903 |
| <i>alr3026</i> | 1,893 | 0,995 | -1,903 |
| <i>all5105</i> | 1,891 | 0,994 | -1,903 |
| <i>alr0078</i> | 1,883 | 0,990 | -1,903 |
| <i>all0123</i> | 1,676 | 0,881 | -1,903 |
| <i>alr0566</i> | 1,645 | 0,864 | -1,903 |
| <i>ubiE</i>    | 1,523 | 0,800 | -1,903 |
| <i>glgA_1</i>  | 1,421 | 0,747 | -1,903 |
| <i>all4180</i> | 1,401 | 0,736 | -1,903 |
| <i>all3007</i> | 1,390 | 0,730 | -1,903 |
| <i>fabG_3</i>  | 1,390 | 0,730 | -1,903 |
| <i>alr1030</i> | 1,379 | 0,725 | -1,903 |
| <i>panB</i>    | 1,358 | 0,713 | -1,903 |
| <i>alr2153</i> | 1,309 | 0,688 | -1,903 |
| <i>hemD</i>    | 1,265 | 0,664 | -1,903 |
| <i>alr0429</i> | 1,265 | 0,664 | -1,903 |

|                |           |          |        |
|----------------|-----------|----------|--------|
| <i>all7366</i> | 1,220     | 0,641    | -1,903 |
| <i>alr0931</i> | 1,200     | 0,630    | -1,903 |
| <i>all4652</i> | 1,187     | 0,624    | -1,903 |
| <i>all4411</i> | 1,183     | 0,622    | -1,903 |
| <i>alr2589</i> | 1,102     | 0,579    | -1,903 |
| <i>alr3096</i> | 1,095     | 0,575    | -1,903 |
| <i>alr2836</i> | 1,084     | 0,570    | -1,903 |
| <i>all2237</i> | 1,039     | 0,546    | -1,903 |
| <i>all4730</i> | 1,021     | 0,537    | -1,903 |
| <i>all4096</i> | 0,981     | 0,516    | -1,903 |
| <i>all2134</i> | 0,944     | 0,496    | -1,903 |
| <i>all2911</i> | 0,907     | 0,477    | -1,903 |
| <i>gvpN</i>    | 0,852     | 0,448    | -1,903 |
| <i>all4897</i> | 0,852     | 0,448    | -1,903 |
| <i>all0930</i> | 0,848     | 0,446    | -1,903 |
| <i>all0392</i> | 0,818     | 0,430    | -1,903 |
| <i>all4298</i> | 0,715     | 0,376    | -1,903 |
| <i>alr2179</i> | 0,684     | 0,359    | -1,903 |
| <i>alr1928</i> | 0,683     | 0,359    | -1,903 |
| <i>alr3934</i> | 0,680     | 0,357    | -1,903 |
| <i>alr7572</i> | 0,578     | 0,304    | -1,903 |
| <i>alr1037</i> | 0,520     | 0,273    | -1,903 |
| <i>alr2691</i> | 0,519     | 0,273    | -1,903 |
| <i>alr1586</i> | 0,423     | 0,222    | -1,903 |
| <i>alr3907</i> | 16,334    | 8,583    | -1,903 |
| <i>alr2791</i> | 5,593     | 2,939    | -1,903 |
| <i>purT</i>    | 5,361     | 2,817    | -1,903 |
| <i>alr1493</i> | 3,305     | 1,736    | -1,903 |
| <i>alr3231</i> | 3,305     | 1,736    | -1,903 |
| <i>alr4711</i> | 2,478     | 1,302    | -1,903 |
| <i>alr0446</i> | 1,652     | 0,868    | -1,903 |
| <i>all7626</i> | 1,352     | 0,711    | -1,903 |
| <i>alr0663</i> | 1,107     | 0,582    | -1,903 |
| <i>alr3073</i> | 1,078     | 0,566    | -1,903 |
| <i>alr1855</i> | 0,597     | 0,314    | -1,903 |
| <i>all2961</i> | 1,902     | 0,000    | -1,902 |
| <i>alr4318</i> | 110,773   | 58,521   | -1,893 |
| <i>ssrA</i>    | 17975,802 | 9511,516 | -1,890 |
| <i>asl0448</i> | 1,883     | 0,000    | -1,883 |
| <i>asr1818</i> | 1,883     | 0,000    | -1,883 |
| <i>asl4948</i> | 1,883     | 0,000    | -1,883 |
| <i>all1716</i> | 6,214     | 3,311    | -1,877 |

|                |         |        |        |
|----------------|---------|--------|--------|
| <i>alr2492</i> | 15,811  | 8,436  | -1,874 |
| <i>alr0331</i> | 9,500   | 5,072  | -1,873 |
| <i>alr1614</i> | 7,314   | 3,912  | -1,870 |
| <i>alr3649</i> | 1,868   | 0,000  | -1,868 |
| <i>all4666</i> | 1,868   | 0,000  | -1,868 |
| <i>all1338</i> | 14,595  | 7,814  | -1,868 |
| <i>asl7296</i> | 95,706  | 51,295 | -1,866 |
| <i>all4459</i> | 1,863   | 0,000  | -1,863 |
| <i>alr0142</i> | 16,955  | 9,112  | -1,861 |
| <i>alr5186</i> | 1,861   | 0,000  | -1,861 |
| <i>alr1397</i> | 15,222  | 8,190  | -1,859 |
| <i>all0853</i> | 7,092   | 3,817  | -1,858 |
| <i>all3540</i> | 15,734  | 8,485  | -1,854 |
| <i>all4387</i> | 15,903  | 8,576  | -1,854 |
| <i>asr1202</i> | 1,853   | 0,000  | -1,853 |
| <i>asl2601</i> | 1,853   | 0,000  | -1,853 |
| <i>alr4552</i> | 12,731  | 6,881  | -1,850 |
| <i>all3916</i> | 10,642  | 5,752  | -1,850 |
| <i>alr7297</i> | 5,724   | 3,093  | -1,850 |
| <i>rfbB_2</i>  | 11,975  | 6,489  | -1,845 |
| <i>asr1661</i> | 42,862  | 23,298 | -1,840 |
| <i>alr2090</i> | 11,231  | 6,105  | -1,840 |
| <i>alr7345</i> | 11,138  | 6,055  | -1,840 |
| <i>all3029</i> | 1,839   | 0,000  | -1,839 |
| <i>alr3204</i> | 1,839   | 0,000  | -1,839 |
| <i>fda</i>     | 128,761 | 70,044 | -1,838 |
| <i>alr1196</i> | 8,480   | 4,627  | -1,833 |
| <i>alr4870</i> | 4,312   | 2,353  | -1,833 |
| <i>atpH</i>    | 37,022  | 20,201 | -1,833 |
| <i>all4422</i> | 11,767  | 6,421  | -1,833 |
| <i>all7614</i> | 11,080  | 6,046  | -1,833 |
| <i>kaiB_2</i>  | 1,832   | 0,000  | -1,832 |
| <i>alr0212</i> | 19,071  | 10,430 | -1,828 |
| <i>all0016</i> | 1,824   | 0,000  | -1,824 |
| <i>asr2896</i> | 1,824   | 0,000  | -1,824 |
| <i>asl4356</i> | 1,824   | 0,000  | -1,824 |
| <i>asr8523</i> | 1,824   | 0,000  | -1,824 |
| <i>all2996</i> | 8,340   | 4,573  | -1,824 |
| <i>all0187</i> | 26,642  | 14,608 | -1,824 |
| <i>all3420</i> | 12,849  | 7,045  | -1,824 |
| <i>ndhA</i>    | 14,399  | 7,895  | -1,824 |
| <i>alr4398</i> | 2,496   | 1,368  | -1,824 |

|                |         |         |        |
|----------------|---------|---------|--------|
| <i>alr0991</i> | 29,696  | 16,313  | -1,820 |
| <i>alr3415</i> | 20,226  | 11,111  | -1,820 |
| <i>alr2851</i> | 18,074  | 9,949   | -1,817 |
| <i>all3902</i> | 18,148  | 9,996   | -1,816 |
| <i>alr4599</i> | 1,815   | 0,000   | -1,815 |
| <i>psaI</i>    | 49,686  | 27,413  | -1,812 |
| <i>leuA_1</i>  | 8,570   | 4,728   | -1,812 |
| <i>all2161</i> | 2,395   | 1,321   | -1,812 |
| <i>all0949</i> | 26,918  | 14,879  | -1,809 |
| <i>alr3280</i> | 19,727  | 10,926  | -1,806 |
| <i>all0641</i> | 43,202  | 23,927  | -1,806 |
| <i>psbC</i>    | 190,625 | 105,633 | -1,805 |
| <i>rplC</i>    | 29,741  | 16,496  | -1,803 |
| <i>all5094</i> | 17,227  | 9,555   | -1,803 |
| <i>tsf</i>     | 32,723  | 18,171  | -1,801 |
| <i>pgk</i>     | 25,623  | 14,229  | -1,801 |
| <i>psbAI</i>   | 629,086 | 349,760 | -1,799 |
| <i>alr2592</i> | 2,335   | 1,299   | -1,797 |
| <i>all0929</i> | 16,270  | 9,052   | -1,797 |
| <i>all0632</i> | 6,594   | 3,669   | -1,797 |
| <i>alr3887</i> | 4,296   | 2,390   | -1,797 |
| <i>alr0506</i> | 1,796   | 0,000   | -1,796 |
| <i>alr1419</i> | 1,796   | 0,000   | -1,796 |
| <i>asr7595</i> | 1,796   | 0,000   | -1,796 |
| <i>all5241</i> | 12,438  | 6,957   | -1,788 |
| <i>alr2464</i> | 9,971   | 5,577   | -1,788 |
| <i>all1871</i> | 961,033 | 538,014 | -1,786 |
| <i>aphB</i>    | 6,987   | 3,916   | -1,784 |
| <i>alr1109</i> | 1,783   | 0,000   | -1,783 |
| <i>all2955</i> | 1,783   | 0,000   | -1,783 |
| <i>alr4995</i> | 9,785   | 5,490   | -1,782 |
| <i>alr3589</i> | 8,092   | 4,556   | -1,776 |
| <i>all7065</i> | 4,894   | 2,755   | -1,776 |
| <i>alr3618</i> | 2,104   | 1,184   | -1,776 |
| <i>cbiQ_1</i>  | 12,245  | 6,894   | -1,776 |
| <i>alr1144</i> | 11,235  | 6,325   | -1,776 |
| <i>alr0039</i> | 5,598   | 3,152   | -1,776 |
| <i>cysS</i>    | 3,357   | 1,890   | -1,776 |
| <i>all1696</i> | 0,817   | 0,460   | -1,776 |
| <i>asl1496</i> | 23,352  | 13,147  | -1,776 |
| <i>asr3134</i> | 23,352  | 13,147  | -1,776 |
| <i>all1304</i> | 11,391  | 6,413   | -1,776 |

|                |        |        |        |
|----------------|--------|--------|--------|
| <i>alr4010</i> | 8,298  | 4,672  | -1,776 |
| <i>all4343</i> | 7,419  | 4,177  | -1,776 |
| <i>all5309</i> | 6,986  | 3,933  | -1,776 |
| <i>crhC</i>    | 3,828  | 2,155  | -1,776 |
| <i>alr4787</i> | 3,199  | 1,801  | -1,776 |
| <i>alr7025</i> | 1,776  | 0,000  | -1,776 |
| <i>all0706</i> | 1,774  | 0,000  | -1,774 |
| <i>all1951</i> | 17,820 | 10,062 | -1,771 |
| <i>asr3834</i> | 1,769  | 0,000  | -1,769 |
| <i>asr4352</i> | 1,769  | 0,000  | -1,769 |
| <i>all4980</i> | 1,769  | 0,000  | -1,769 |
| <i>asr5175</i> | 1,769  | 0,000  | -1,769 |
| <i>alr3260</i> | 19,053 | 10,782 | -1,767 |
| <i>alr5361</i> | 13,048 | 7,383  | -1,767 |
| <i>all1835</i> | 27,273 | 15,450 | -1,765 |
| <i>all0626</i> | 8,019  | 4,551  | -1,762 |
| <i>all5073</i> | 6,132  | 3,480  | -1,762 |
| <i>all3321</i> | 12,421 | 7,049  | -1,762 |
| <i>all0497</i> | 9,508  | 5,396  | -1,762 |
| <i>all1636</i> | 3,042  | 1,731  | -1,757 |
| <i>alr1740</i> | 1,756  | 0,000  | -1,756 |
| <i>all2907</i> | 1,756  | 0,000  | -1,756 |
| <i>ftsH_1</i>  | 44,689 | 25,480 | -1,754 |
| <i>alr1346</i> | 20,647 | 11,784 | -1,752 |
| <i>all0648</i> | 10,442 | 5,986  | -1,745 |
| <i>all0542</i> | 4,475  | 2,565  | -1,745 |
| <i>all1699</i> | 4,369  | 2,504  | -1,745 |
| <i>all0723</i> | 3,528  | 2,023  | -1,745 |
| <i>alr5214</i> | 3,528  | 2,023  | -1,745 |
| <i>all2897</i> | 1,985  | 1,138  | -1,745 |
| <i>rpoA</i>    | 28,451 | 16,309 | -1,745 |
| <i>all0270</i> | 16,900 | 9,687  | -1,745 |
| <i>asr0460</i> | 15,663 | 8,978  | -1,745 |
| <i>alr7100</i> | 7,977  | 4,573  | -1,745 |
| <i>all1770</i> | 7,533  | 4,318  | -1,745 |
| <i>pecF</i>    | 7,381  | 4,231  | -1,745 |
| <i>all1503</i> | 7,135  | 4,090  | -1,745 |
| <i>all4904</i> | 5,465  | 3,133  | -1,745 |
| <i>rph</i>     | 5,179  | 2,969  | -1,745 |
| <i>hisB_1</i>  | 4,865  | 2,789  | -1,745 |
| <i>alr5125</i> | 3,008  | 1,724  | -1,745 |
| <i>alr3926</i> | 2,899  | 1,662  | -1,745 |



|                |        |        |        |
|----------------|--------|--------|--------|
| <i>hlyD</i>    | 2,564  | 1,470  | -1,745 |
| <i>alr1655</i> | 2,513  | 1,441  | -1,745 |
| <i>all0635</i> | 1,562  | 0,896  | -1,745 |
| <i>alr2366</i> | 21,586 | 12,374 | -1,745 |
| <i>alr0445</i> | 9,861  | 5,652  | -1,745 |
| <i>all0253</i> | 6,030  | 3,456  | -1,745 |
| <i>all4008</i> | 4,354  | 2,496  | -1,745 |
| <i>asr4594</i> | 1,743  | 0,000  | -1,743 |
| <i>asr4942</i> | 1,743  | 0,000  | -1,743 |
| <i>ftsH_2</i>  | 23,389 | 13,460 | -1,738 |
| <i>alr7301</i> | 1,736  | 0,000  | -1,736 |
| <i>all4184</i> | 1,734  | 0,000  | -1,734 |
| <i>alr5031</i> | 1,734  | 0,000  | -1,734 |
| <i>alr8534</i> | 1,732  | 0,000  | -1,732 |
| <i>alr4543</i> | 34,681 | 20,046 | -1,730 |
| <i>alr2765</i> | 8,670  | 5,011  | -1,730 |
| <i>alr4258</i> | 14,790 | 8,589  | -1,722 |
| <i>alr2744</i> | 5,183  | 3,010  | -1,722 |
| <i>alr1674</i> | 2,966  | 1,722  | -1,722 |
| <i>alr0444</i> | 17,607 | 10,225 | -1,722 |
| <i>ribH</i>    | 11,615 | 6,746  | -1,722 |
| <i>alr4370</i> | 8,803  | 5,113  | -1,722 |
| <i>alr4530</i> | 5,703  | 3,312  | -1,722 |
| <i>all3652</i> | 5,667  | 3,291  | -1,722 |
| <i>alr3690</i> | 1,721  | 0,000  | -1,721 |
| <i>thrC_2</i>  | 55,294 | 32,157 | -1,719 |
| <i>glgB</i>    | 12,821 | 7,459  | -1,719 |
| <i>asr2755</i> | 1,717  | 0,000  | -1,717 |
| <i>asl2844</i> | 1,717  | 0,000  | -1,717 |
| <i>alr5233</i> | 1,717  | 0,000  | -1,717 |
| <i>rpsI</i>    | 38,640 | 22,511 | -1,717 |
| <i>all3741</i> | 25,020 | 14,608 | -1,713 |
| <i>all4231</i> | 1,711  | 0,000  | -1,711 |
| <i>minD_3</i>  | 15,192 | 8,895  | -1,708 |
| <i>all4183</i> | 14,466 | 8,470  | -1,708 |
| <i>alr4533</i> | 9,982  | 5,855  | -1,705 |
| <i>alr0627</i> | 5,529  | 3,243  | -1,705 |
| <i>all2798</i> | 1,705  | 0,000  | -1,705 |
| <i>alr5034</i> | 1,705  | 0,000  | -1,705 |
| <i>all8003</i> | 1,705  | 0,000  | -1,705 |
| <i>cpcG1</i>   | 39,198 | 23,007 | -1,704 |
| <i>alr0599</i> | 26,987 | 15,917 | -1,696 |

|                |        |        |        |
|----------------|--------|--------|--------|
| <i>alr0734</i> | 1,692  | 0,000  | -1,692 |
| <i>all7131</i> | 1,692  | 0,000  | -1,692 |
| <i>alr7298</i> | 1,692  | 0,000  | -1,692 |
| <i>asr0785</i> | 15,313 | 9,052  | -1,692 |
| <i>all2874</i> | 11,288 | 6,673  | -1,692 |
| <i>all3872</i> | 6,997  | 4,136  | -1,692 |
| <i>alr5338</i> | 6,997  | 4,136  | -1,692 |
| <i>alr4554</i> | 6,420  | 3,795  | -1,692 |
| <i>alr5367</i> | 2,661  | 1,573  | -1,692 |
| <i>alr3059</i> | 2,566  | 1,517  | -1,692 |
| <i>alr0564</i> | 2,347  | 1,387  | -1,692 |
| <i>asl4138</i> | 18,870 | 11,155 | -1,692 |
| <i>alr7342</i> | 18,436 | 10,898 | -1,692 |
| <i>asl3261</i> | 14,153 | 8,366  | -1,692 |
| <i>all1908</i> | 9,781  | 5,782  | -1,692 |
| <i>alr2139</i> | 9,248  | 5,467  | -1,692 |
| <i>all5063</i> | 8,939  | 5,284  | -1,692 |
| <i>all0538</i> | 6,894  | 4,075  | -1,692 |
| <i>all4762</i> | 6,509  | 3,848  | -1,692 |
| <i>all3171</i> | 6,085  | 3,597  | -1,692 |
| <i>alr7233</i> | 5,463  | 3,229  | -1,692 |
| <i>all4163</i> | 4,670  | 2,761  | -1,692 |
| <i>alr2735</i> | 4,427  | 2,617  | -1,692 |
| <i>alr0490</i> | 4,133  | 2,443  | -1,692 |
| <i>all4245</i> | 3,992  | 2,360  | -1,692 |
| <i>all1106</i> | 3,925  | 2,320  | -1,692 |
| <i>all4969</i> | 3,600  | 2,128  | -1,692 |
| <i>alr4691</i> | 3,447  | 2,038  | -1,692 |
| <i>alr3358</i> | 3,188  | 1,885  | -1,692 |
| <i>alr0999</i> | 3,135  | 1,853  | -1,692 |
| <i>alr3884</i> | 3,135  | 1,853  | -1,692 |
| <i>all2260</i> | 3,103  | 1,834  | -1,692 |
| <i>alr3120</i> | 2,903  | 1,716  | -1,692 |
| <i>all2908</i> | 2,538  | 1,500  | -1,692 |
| <i>alr0871</i> | 2,478  | 1,465  | -1,692 |
| <i>alr1627</i> | 2,478  | 1,465  | -1,692 |
| <i>all2748</i> | 2,188  | 1,293  | -1,692 |
| <i>all7382</i> | 2,071  | 1,224  | -1,692 |
| <i>coxA_2</i>  | 1,668  | 0,986  | -1,692 |
| <i>alr0205</i> | 1,299  | 0,768  | -1,692 |
| <i>alr1184</i> | 1,098  | 0,649  | -1,692 |
| <i>alr0774</i> | 7,241  | 4,280  | -1,692 |

|                |          |         |        |
|----------------|----------|---------|--------|
| <i>alr4016</i> | 7,241    | 4,280   | -1,692 |
| <i>all4256</i> | 7,023    | 4,152   | -1,692 |
| <i>coaD</i>    | 4,865    | 2,876   | -1,692 |
| <i>all0160</i> | 2,426    | 1,434   | -1,692 |
| <i>alr1142</i> | 1,789    | 1,058   | -1,692 |
| <i>alr0242</i> | 1,687    | 0,000   | -1,687 |
| <i>alr7304</i> | 2,956    | 1,752   | -1,687 |
| <i>alr3808</i> | 53,647   | 31,837  | -1,685 |
| <i>all2156</i> | 1,680    | 0,000   | -1,680 |
| <i>allrt43</i> | 180,385  | 107,459 | -1,679 |
| <i>alr1403</i> | 1,677    | 0,000   | -1,677 |
| <i>all1606</i> | 10,000   | 5,965   | -1,677 |
| <i>all7571</i> | 1,676    | 0,000   | -1,676 |
| <i>alr0942</i> | 11,249   | 6,726   | -1,672 |
| <i>accD</i>    | 18,417   | 11,032  | -1,669 |
| <i>rpsB</i>    | 21,948   | 13,147  | -1,669 |
| <i>all3526</i> | 21,041   | 12,613  | -1,668 |
| <i>asr3081</i> | 1,668    | 0,000   | -1,668 |
| <i>alr7308</i> | 1,668    | 0,000   | -1,668 |
| <i>alr2079</i> | 8,354    | 5,017   | -1,665 |
| <i>alr0546</i> | 5,330    | 3,201   | -1,665 |
| <i>cpcG3</i>   | 41,210   | 24,747  | -1,665 |
| <i>alr0093</i> | 3,904    | 2,345   | -1,665 |
| <i>all3375</i> | 9,263    | 5,572   | -1,662 |
| <i>alr0973</i> | 1,660    | 0,000   | -1,660 |
| <i>frr</i>     | 21,693   | 13,075  | -1,659 |
| <i>leuS</i>    | 10,833   | 6,536   | -1,658 |
| <i>rps1_1</i>  | 31,906   | 19,262  | -1,656 |
| <i>hupB</i>    | 1,656    | 0,000   | -1,656 |
| <i>alr4634</i> | 1,656    | 0,000   | -1,656 |
| <i>alr4949</i> | 30,930   | 18,690  | -1,655 |
| <i>psaK</i>    | 314,047  | 190,404 | -1,649 |
| <i>asr4313</i> | 37,479   | 22,723  | -1,649 |
| <i>all3819</i> | 5,383    | 3,263   | -1,649 |
| <i>all2529</i> | 3,343    | 2,027   | -1,649 |
| <i>alr3771</i> | 3,042    | 1,844   | -1,649 |
| <i>all4902</i> | 3,776    | 2,289   | -1,649 |
| <i>all1176</i> | 1,747    | 1,059   | -1,649 |
| <i>rnpB</i>    | 1393,517 | 845,063 | -1,649 |
| <i>alr0683</i> | 1,645    | 0,000   | -1,645 |
| <i>all0781</i> | 10,816   | 6,587   | -1,642 |
| <i>alr0970</i> | 11,418   | 6,967   | -1,639 |

|                |         |         |        |
|----------------|---------|---------|--------|
| <i>alr7208</i> | 9,756   | 5,953   | -1,639 |
| <i>alr3437</i> | 4,570   | 2,789   | -1,639 |
| <i>cpcC</i>    | 252,236 | 154,557 | -1,632 |
| <i>alr2570</i> | 7,426   | 4,553   | -1,631 |
| <i>ptrC</i>    | 34,454  | 21,121  | -1,631 |
| <i>secY</i>    | 14,395  | 8,825   | -1,631 |
| <i>ftsZ</i>    | 9,798   | 6,007   | -1,631 |
| <i>alr4147</i> | 3,780   | 2,317   | -1,631 |
| <i>all4261</i> | 2,027   | 1,242   | -1,631 |
| <i>alr0141</i> | 6,145   | 3,767   | -1,631 |
| <i>alr4075</i> | 4,050   | 2,482   | -1,631 |
| <i>all1703</i> | 3,766   | 2,309   | -1,631 |
| <i>all4495</i> | 2,719   | 1,667   | -1,631 |
| <i>all1881</i> | 1,629   | 0,000   | -1,629 |
| <i>all1861</i> | 41,083  | 25,223  | -1,629 |
| <i>alr5229</i> | 1,627   | 0,000   | -1,627 |
| <i>all4933</i> | 10,207  | 6,279   | -1,626 |
| <i>asl1066</i> | 1,622   | 0,000   | -1,622 |
| <i>alr2093</i> | 1,622   | 0,000   | -1,622 |
| <i>alr2276</i> | 1,622   | 0,000   | -1,622 |
| <i>asr3217</i> | 1,622   | 0,000   | -1,622 |
| <i>asl3480</i> | 1,622   | 0,000   | -1,622 |
| <i>psaF</i>    | 260,412 | 160,632 | -1,621 |
| <i>alr2722</i> | 1,618   | 0,000   | -1,618 |
| <i>all2430</i> | 4,502   | 2,785   | -1,617 |
| <i>all1284</i> | 1,616   | 0,000   | -1,616 |
| <i>all3550</i> | 15,643  | 9,687   | -1,615 |
| <i>rpsP</i>    | 37,578  | 23,272  | -1,615 |
| <i>alr0202</i> | 8,072   | 4,999   | -1,615 |
| <i>alr1753</i> | 7,031   | 4,354   | -1,615 |
| <i>pknA</i>    | 5,786   | 3,583   | -1,615 |
| <i>alr0213</i> | 31,638  | 19,593  | -1,615 |
| <i>alr2018</i> | 1,614   | 0,000   | -1,614 |
| <i>alr3601</i> | 20,825  | 12,910  | -1,613 |
| <i>alr5032</i> | 1,613   | 0,000   | -1,613 |
| <i>atpF</i>    | 20,495  | 12,727  | -1,610 |
| <i>all4967</i> | 1,607   | 0,000   | -1,607 |
| <i>ccmM</i>    | 46,200  | 28,800  | -1,604 |
| <i>alr2935</i> | 15,066  | 9,401   | -1,603 |
| <i>all0924</i> | 1,599   | 0,000   | -1,599 |
| <i>alr2331</i> | 1,599   | 0,000   | -1,599 |
| <i>asr3005</i> | 1,599   | 0,000   | -1,599 |

|                |        |        |        |
|----------------|--------|--------|--------|
| <i>asl5268</i> | 1,599  | 0,000  | -1,599 |
| <i>apcF</i>    | 53,573 | 33,563 | -1,596 |
| <i>all7182</i> | 1,589  | 0,000  | -1,589 |
| <i>all7013</i> | 17,341 | 10,934 | -1,586 |
| <i>all3263</i> | 10,761 | 6,786  | -1,586 |
| <i>alr4334</i> | 10,031 | 6,325  | -1,586 |
| <i>asr5092</i> | 9,267  | 5,843  | -1,586 |
| <i>alr4740</i> | 8,936  | 5,634  | -1,586 |
| <i>alr2136</i> | 7,485  | 4,719  | -1,586 |
| <i>all1849</i> | 6,415  | 4,045  | -1,586 |
| <i>all4764</i> | 5,838  | 3,681  | -1,586 |
| <i>all1079</i> | 5,166  | 3,258  | -1,586 |
| <i>alr3419</i> | 5,099  | 3,215  | -1,586 |
| <i>alr0964</i> | 5,077  | 3,201  | -1,586 |
| <i>lpxD</i>    | 5,004  | 3,155  | -1,586 |
| <i>murE</i>    | 4,699  | 2,963  | -1,586 |
| <i>alr7294</i> | 4,597  | 2,899  | -1,586 |
| <i>all0473</i> | 4,526  | 2,854  | -1,586 |
| <i>all2456</i> | 4,406  | 2,778  | -1,586 |
| <i>all3373</i> | 4,230  | 2,667  | -1,586 |
| <i>all4901</i> | 3,909  | 2,465  | -1,586 |
| <i>alr3790</i> | 3,841  | 2,422  | -1,586 |
| <i>all1227</i> | 3,327  | 2,098  | -1,586 |
| <i>alr5249</i> | 3,243  | 2,045  | -1,586 |
| <i>all3197</i> | 3,122  | 1,969  | -1,586 |
| <i>alr2921</i> | 2,919  | 1,841  | -1,586 |
| <i>alr3554</i> | 2,905  | 1,831  | -1,586 |
| <i>alr1799</i> | 2,897  | 1,827  | -1,586 |
| <i>alr5231</i> | 2,538  | 1,600  | -1,586 |
| <i>all4727</i> | 2,443  | 1,540  | -1,586 |
| <i>all4013</i> | 2,131  | 1,343  | -1,586 |
| <i>all0862</i> | 1,902  | 1,199  | -1,586 |
| <i>alr3303</i> | 1,774  | 1,119  | -1,586 |
| <i>alr4033</i> | 1,748  | 1,102  | -1,586 |
| <i>all0666</i> | 1,673  | 1,055  | -1,586 |
| <i>alr1094</i> | 1,654  | 1,043  | -1,586 |
| <i>alr5238</i> | 1,524  | 0,961  | -1,586 |
| <i>alr4602</i> | 1,493  | 0,941  | -1,586 |
| <i>alr0776</i> | 1,471  | 0,927  | -1,586 |
| <i>all5106</i> | 1,431  | 0,902  | -1,586 |
| <i>all0959</i> | 1,242  | 0,783  | -1,586 |
| <i>alr4738</i> | 1,189  | 0,750  | -1,586 |

|                |        |        |        |
|----------------|--------|--------|--------|
| <i>alr0369</i> | 1,163  | 0,733  | -1,586 |
| <i>all4620</i> | 1,121  | 0,707  | -1,586 |
| <i>all4446</i> | 1,012  | 0,638  | -1,586 |
| <i>alr5067</i> | 20,131 | 12,694 | -1,586 |
| <i>alr3426</i> | 18,832 | 11,875 | -1,586 |
| <i>hoxU</i>    | 17,099 | 10,782 | -1,586 |
| <i>purK</i>    | 13,268 | 8,366  | -1,586 |
| <i>fabZ</i>    | 10,183 | 6,421  | -1,586 |
| <i>asl0822</i> | 8,108  | 5,113  | -1,586 |
| <i>exbB</i>    | 8,034  | 5,066  | -1,586 |
| <i>ureE</i>    | 7,889  | 4,975  | -1,586 |
| <i>alr2762</i> | 6,710  | 4,231  | -1,586 |
| <i>alr2741</i> | 6,380  | 4,023  | -1,586 |
| <i>btpA</i>    | 6,189  | 3,902  | -1,586 |
| <i>alr4528</i> | 5,988  | 3,776  | -1,586 |
| <i>all4778</i> | 5,578  | 3,517  | -1,586 |
| <i>all2740</i> | 5,456  | 3,440  | -1,586 |
| <i>alr4514</i> | 5,260  | 3,316  | -1,586 |
| <i>all4283</i> | 4,670  | 2,945  | -1,586 |
| <i>all4782</i> | 4,670  | 2,945  | -1,586 |
| <i>pknB</i>    | 3,791  | 2,390  | -1,586 |
| <i>alr2538</i> | 3,779  | 2,383  | -1,586 |
| <i>alr4795</i> | 3,695  | 2,330  | -1,586 |
| <i>alr2426</i> | 3,355  | 2,116  | -1,586 |
| <i>all5074</i> | 3,355  | 2,116  | -1,586 |
| <i>alr1628</i> | 3,105  | 1,958  | -1,586 |
| <i>all7648</i> | 3,041  | 1,917  | -1,586 |
| <i>all5173</i> | 3,022  | 1,905  | -1,586 |
| <i>alr0787</i> | 3,009  | 1,897  | -1,586 |
| <i>thrB</i>    | 2,994  | 1,888  | -1,586 |
| <i>all3010</i> | 2,852  | 1,799  | -1,586 |
| <i>alr2118</i> | 2,820  | 1,778  | -1,586 |
| <i>all2116</i> | 2,800  | 1,766  | -1,586 |
| <i>all4906</i> | 2,741  | 1,728  | -1,586 |
| <i>hisD_2</i>  | 2,703  | 1,704  | -1,586 |
| <i>all2459</i> | 2,636  | 1,662  | -1,586 |
| <i>alr0072</i> | 2,595  | 1,636  | -1,586 |
| <i>all3767</i> | 2,516  | 1,587  | -1,586 |
| <i>alr2307</i> | 2,479  | 1,563  | -1,586 |
| <i>alr4837</i> | 2,433  | 1,534  | -1,586 |
| <i>alr3910</i> | 2,308  | 1,455  | -1,586 |
| <i>all4155</i> | 2,092  | 1,319  | -1,586 |

|                |        |        |        |
|----------------|--------|--------|--------|
| <i>purU</i>    | 2,048  | 1,292  | -1,586 |
| <i>alr5028</i> | 1,966  | 1,239  | -1,586 |
| <i>all3232</i> | 1,959  | 1,235  | -1,586 |
| <i>all2900</i> | 1,940  | 1,223  | -1,586 |
| <i>all4458</i> | 1,830  | 1,154  | -1,586 |
| <i>alr4674</i> | 1,824  | 1,150  | -1,586 |
| <i>mtnA</i>    | 1,678  | 1,058  | -1,586 |
| <i>all8544</i> | 1,668  | 1,052  | -1,586 |
| <i>alr1786</i> | 1,631  | 1,028  | -1,586 |
| <i>alr1097</i> | 1,549  | 0,976  | -1,586 |
| <i>all0729</i> | 1,419  | 0,895  | -1,586 |
| <i>all1191</i> | 1,339  | 0,844  | -1,586 |
| <i>all5115</i> | 1,277  | 0,806  | -1,586 |
| <i>alr3749</i> | 1,250  | 0,788  | -1,586 |
| <i>all5193</i> | 0,971  | 0,613  | -1,586 |
| <i>hglC</i>    | 0,526  | 0,332  | -1,586 |
| <i>rnpA</i>    | 16,562 | 10,443 | -1,586 |
| <i>all3569</i> | 4,561  | 2,876  | -1,586 |
| <i>asl0639</i> | 1,578  | 0,000  | -1,578 |
| <i>alr2081</i> | 1,578  | 0,000  | -1,578 |
| <i>petA</i>    | 33,910 | 21,492 | -1,578 |
| <i>sigA</i>    | 63,606 | 40,483 | -1,571 |
| <i>rpsC</i>    | 21,026 | 13,399 | -1,569 |
| <i>alr0725</i> | 1,567  | 0,000  | -1,567 |
| <i>alr1569</i> | 1,567  | 0,000  | -1,567 |
| <i>alr1967</i> | 1,567  | 0,000  | -1,567 |
| <i>all3850</i> | 10,542 | 6,731  | -1,566 |
| <i>atpI</i>    | 59,307 | 37,980 | -1,562 |
| <i>all3985</i> | 6,075  | 3,891  | -1,562 |
| <i>truA</i>    | 24,342 | 15,609 | -1,560 |
| <i>guaA</i>    | 18,561 | 11,908 | -1,559 |
| <i>asr2120</i> | 1,557  | 0,000  | -1,557 |
| <i>asl3236</i> | 1,557  | 0,000  | -1,557 |
| <i>alr4161</i> | 9,693  | 6,251  | -1,551 |
| <i>alr0175</i> | 9,375  | 6,046  | -1,551 |
| <i>alr3338</i> | 5,708  | 3,681  | -1,551 |
| <i>all0387</i> | 7,940  | 5,121  | -1,551 |
| <i>alr2479</i> | 5,385  | 3,473  | -1,551 |
| <i>all4874</i> | 1,550  | 0,000  | -1,550 |
| <i>all4988</i> | 1,550  | 0,000  | -1,550 |
| <i>all2705</i> | 41,720 | 26,924 | -1,550 |
| <i>all5090</i> | 27,937 | 18,067 | -1,546 |

|                |         |         |        |
|----------------|---------|---------|--------|
| <i>cpcG2</i>   | 36,723  | 23,749  | -1,546 |
| <i>all2198</i> | 1,543   | 0,000   | -1,543 |
| <i>alr3959</i> | 1,543   | 0,000   | -1,543 |
| <i>pecA</i>    | 540,109 | 350,048 | -1,543 |
| <i>all3076</i> | 8,036   | 5,216   | -1,541 |
| <i>alr7346</i> | 7,547   | 4,899   | -1,541 |
| <i>all4744</i> | 3,233   | 2,098   | -1,541 |
| <i>all7364</i> | 15,629  | 10,145  | -1,541 |
| <i>alr2790</i> | 15,387  | 9,988   | -1,541 |
| <i>all1768</i> | 6,145   | 3,989   | -1,541 |
| <i>all4384</i> | 4,034   | 2,619   | -1,541 |
| <i>all1688</i> | 2,932   | 1,903   | -1,541 |
| <i>all2003</i> | 19,653  | 12,756  | -1,541 |
| <i>ndhF_1</i>  | 6,413   | 4,163   | -1,541 |
| <i>all2870</i> | 3,092   | 2,007   | -1,541 |
| <i>rbcL</i>    | 202,190 | 131,580 | -1,537 |
| <i>asl0572</i> | 1,536   | 0,000   | -1,536 |
| <i>alr2325</i> | 1,536   | 0,000   | -1,536 |
| <i>alr2407</i> | 1,536   | 0,000   | -1,536 |
| <i>asr2666</i> | 1,536   | 0,000   | -1,536 |
| <i>asr7154</i> | 1,536   | 0,000   | -1,536 |
| <i>all4037</i> | 21,146  | 13,768  | -1,536 |
| <i>alr2272</i> | 13,384  | 8,730   | -1,533 |
| <i>psaE</i>    | 134,851 | 88,140  | -1,530 |
| <i>alr1554</i> | 7,861   | 5,138   | -1,530 |
| <i>atpA</i>    | 31,090  | 20,330  | -1,529 |
| <i>ycf27</i>   | 25,466  | 16,664  | -1,528 |
| <i>alr3344</i> | 31,844  | 20,847  | -1,528 |
| <i>all2457</i> | 108,320 | 70,962  | -1,526 |
| <i>all7170</i> | 1,526   | 0,000   | -1,526 |
| <i>asr1156</i> | 19,734  | 12,962  | -1,522 |
| <i>alr3203</i> | 8,596   | 5,646   | -1,522 |
| <i>alr4814</i> | 8,596   | 5,646   | -1,522 |
| <i>all4367</i> | 7,413   | 4,869   | -1,522 |
| <i>alr5061</i> | 4,208   | 2,764   | -1,522 |
| <i>alr3911</i> | 2,034   | 1,336   | -1,522 |
| <i>alr1160</i> | 13,873  | 9,112   | -1,522 |
| <i>all7160</i> | 11,485  | 7,543   | -1,522 |
| <i>all3447</i> | 7,149   | 4,695   | -1,522 |
| <i>pyrE</i>    | 6,769   | 4,446   | -1,522 |
| <i>all1745</i> | 6,369   | 4,183   | -1,522 |
| <i>ndhD_3</i>  | 5,327   | 3,499   | -1,522 |



|                |         |        |        |
|----------------|---------|--------|--------|
| <i>fbp</i>     | 4,003   | 2,629  | -1,522 |
| <i>all4665</i> | 3,839   | 2,521  | -1,522 |
| <i>hisS</i>    | 3,026   | 1,988  | -1,522 |
| <i>infC_1</i>  | 102,267 | 67,276 | -1,520 |
| <i>cpcD</i>    | 113,878 | 74,986 | -1,519 |
| <i>alr0297</i> | 1,516   | 0,000  | -1,516 |
| <i>asl0977</i> | 1,516   | 0,000  | -1,516 |
| <i>alr1877</i> | 1,516   | 0,000  | -1,516 |
| <i>asr2958</i> | 1,516   | 0,000  | -1,516 |
| <i>alr5216</i> | 11,333  | 7,479  | -1,515 |
| <i>alr4124</i> | 32,449  | 21,422 | -1,515 |
| <i>alr4174</i> | 15,945  | 10,541 | -1,513 |
| <i>alr7163</i> | 14,790  | 9,816  | -1,507 |
| <i>rplM</i>    | 14,595  | 9,687  | -1,507 |
| <i>alr7232</i> | 3,792   | 2,517  | -1,507 |
| <i>all4160</i> | 6,302   | 4,183  | -1,507 |
| <i>alr7250</i> | 1,507   | 0,000  | -1,507 |
| <i>thiC</i>    | 30,847  | 20,495 | -1,505 |
| <i>alr4330</i> | 11,941  | 7,948  | -1,502 |
| <i>alr2264</i> | 1,502   | 0,000  | -1,502 |
| <i>alr2503</i> | 18,974  | 12,654 | -1,499 |
| <i>pbpB</i>    | 3,974   | 2,650  | -1,499 |
| <i>all3194</i> | 1,497   | 0,000  | -1,497 |
| <i>alr0658</i> | 8,340   | 5,577  | -1,495 |
| <i>secD</i>    | 8,112   | 5,425  | -1,495 |
| <i>alr3092</i> | 2,985   | 1,996  | -1,495 |
| <i>alr3980</i> | 21,769  | 14,558 | -1,495 |
| <i>all1695</i> | 2,657   | 1,777  | -1,495 |
| <i>rpmE</i>    | 58,380  | 39,112 | -1,493 |
| <i>alr3146</i> | 7,252   | 4,859  | -1,493 |
| <i>sigD</i>    | 14,025  | 9,396  | -1,493 |
| <i>ccmN</i>    | 22,039  | 14,784 | -1,491 |
| <i>all3391</i> | 1,487   | 0,000  | -1,487 |
| <i>alr4914</i> | 1,487   | 0,000  | -1,487 |
| <i>all4436</i> | 1,486   | 0,000  | -1,486 |
| <i>rpsO</i>    | 18,163  | 12,270 | -1,480 |
| <i>asl4547</i> | 17,963  | 12,136 | -1,480 |
| <i>all4801</i> | 17,483  | 11,811 | -1,480 |
| <i>rplF</i>    | 13,399  | 9,052  | -1,480 |
| <i>alr2475</i> | 10,898  | 7,362  | -1,480 |
| <i>rpmC</i>    | 10,898  | 7,362  | -1,480 |
| <i>alr3737</i> | 4,191   | 2,832  | -1,480 |

|                |        |        |        |
|----------------|--------|--------|--------|
| <i>all2344</i> | 1,858  | 1,255  | -1,480 |
| <i>alr1192</i> | 1,728  | 1,167  | -1,480 |
| <i>avaIM</i>   | 1,692  | 1,143  | -1,480 |
| <i>rpsD</i>    | 36,236 | 24,481 | -1,480 |
| <i>all1732</i> | 13,737 | 9,280  | -1,480 |
| <i>asr5262</i> | 13,622 | 9,203  | -1,480 |
| <i>alr1093</i> | 8,718  | 5,890  | -1,480 |
| <i>all1660</i> | 8,092  | 5,467  | -1,480 |
| <i>all1769</i> | 7,046  | 4,760  | -1,480 |
| <i>alr1850</i> | 6,645  | 4,489  | -1,480 |
| <i>all2930</i> | 6,645  | 4,489  | -1,480 |
| <i>nuiA</i>    | 6,010  | 4,060  | -1,480 |
| <i>alr3340</i> | 5,173  | 3,495  | -1,480 |
| <i>all0186</i> | 4,836  | 3,267  | -1,480 |
| <i>all2497</i> | 4,406  | 2,977  | -1,480 |
| <i>all0457</i> | 3,784  | 2,556  | -1,480 |
| <i>ftsE</i>    | 3,732  | 2,521  | -1,480 |
| <i>surE_1</i>  | 3,601  | 2,432  | -1,480 |
| <i>all7309</i> | 3,205  | 2,165  | -1,480 |
| <i>natA</i>    | 3,132  | 2,116  | -1,480 |
| <i>all2124</i> | 2,912  | 1,967  | -1,480 |
| <i>all4221</i> | 2,838  | 1,917  | -1,480 |
| <i>alr4054</i> | 2,809  | 1,897  | -1,480 |
| <i>alr2306</i> | 2,671  | 1,804  | -1,480 |
| <i>all0879</i> | 2,484  | 1,678  | -1,480 |
| <i>alr3240</i> | 2,362  | 1,596  | -1,480 |
| <i>alr1250</i> | 2,252  | 1,521  | -1,480 |
| <i>natC</i>    | 2,162  | 1,461  | -1,480 |
| <i>alr5035</i> | 1,870  | 1,264  | -1,480 |
| <i>all3780</i> | 1,635  | 1,104  | -1,480 |
| <i>alr0499</i> | 1,519  | 1,026  | -1,480 |
| <i>all0364</i> | 0,907  | 0,613  | -1,480 |
| <i>ppnK_2</i>  | 8,013  | 5,413  | -1,480 |
| <i>all0770</i> | 5,140  | 3,473  | -1,480 |
| <i>all3323</i> | 4,865  | 3,287  | -1,480 |
| <i>all4615</i> | 4,279  | 2,891  | -1,480 |
| <i>all2020</i> | 2,573  | 1,738  | -1,480 |
| <i>alr1331</i> | 2,570  | 1,736  | -1,480 |
| <i>alr1564</i> | 2,224  | 1,503  | -1,480 |
| <i>alr4879</i> | 2,003  | 1,353  | -1,480 |
| <i>alr7242</i> | 1,845  | 1,246  | -1,480 |
| <i>asr1307</i> | 1,478  | 0,000  | -1,478 |

|                |        |        |        |
|----------------|--------|--------|--------|
| <i>asl2182</i> | 1,478  | 0,000  | -1,478 |
| <i>asr2427</i> | 1,478  | 0,000  | -1,478 |
| <i>all5169</i> | 1,478  | 0,000  | -1,478 |
| <i>all7269</i> | 1,469  | 0,000  | -1,469 |
| <i>ileS</i>    | 12,636 | 8,619  | -1,466 |
| <i>asr1667</i> | 1,460  | 0,000  | -1,460 |
| <i>all2609</i> | 1,460  | 0,000  | -1,460 |
| <i>hetP_1</i>  | 1,460  | 0,000  | -1,460 |
| <i>all4327</i> | 6,868  | 4,707  | -1,459 |
| <i>pheT</i>    | 3,311  | 2,270  | -1,459 |
| <i>aspS</i>    | 4,506  | 3,088  | -1,459 |
| <i>alr7318</i> | 3,090  | 2,118  | -1,459 |
| <i>all0040</i> | 8,911  | 6,123  | -1,455 |
| <i>alr1805</i> | 22,298 | 15,338 | -1,454 |
| <i>clpB_3</i>  | 98,413 | 67,707 | -1,454 |
| <i>all2089</i> | 1,450  | 0,000  | -1,450 |
| <i>all5369</i> | 1,450  | 0,000  | -1,450 |
| <i>frvV</i>    | 25,246 | 17,411 | -1,450 |
| <i>all1981</i> | 17,192 | 11,856 | -1,450 |
| <i>alr3302</i> | 7,916  | 5,459  | -1,450 |
| <i>all1751</i> | 5,766  | 3,977  | -1,450 |
| <i>alr0300</i> | 5,544  | 3,823  | -1,450 |
| <i>alr1376</i> | 4,647  | 3,205  | -1,450 |
| <i>all1763</i> | 13,297 | 9,170  | -1,450 |
| <i>alr2114</i> | 3,782  | 2,608  | -1,450 |
| <i>apcE</i>    | 99,963 | 69,042 | -1,448 |
| <i>alr2780</i> | 12,973 | 8,973  | -1,446 |
| <i>all3227</i> | 36,267 | 25,099 | -1,445 |
| <i>rps11</i>   | 36,267 | 25,099 | -1,445 |
| <i>all3556</i> | 10,498 | 7,265  | -1,445 |
| <i>hemE</i>    | 52,226 | 36,182 | -1,443 |
| <i>clpP_1</i>  | 14,239 | 9,876  | -1,442 |
| <i>ndhD_2</i>  | 5,826  | 4,041  | -1,442 |
| <i>all3401</i> | 4,293  | 2,977  | -1,442 |
| <i>tldD</i>    | 11,890 | 8,247  | -1,442 |
| <i>ycf16</i>   | 11,099 | 7,698  | -1,442 |
| <i>all1984</i> | 1,441  | 0,000  | -1,441 |
| <i>asl3777</i> | 1,441  | 0,000  | -1,441 |
| <i>alr3958</i> | 32,275 | 22,446 | -1,438 |
| <i>alr3057</i> | 12,397 | 8,635  | -1,436 |
| <i>all3678</i> | 22,363 | 15,598 | -1,434 |
| <i>cphB</i>    | 30,850 | 21,545 | -1,432 |

|                |        |        |        |
|----------------|--------|--------|--------|
| <i>fus_2</i>   | 42,000 | 29,396 | -1,429 |
| <i>alr7153</i> | 1,427  | 0,000  | -1,427 |
| <i>rpmF</i>    | 18,118 | 12,694 | -1,427 |
| <i>alr4831</i> | 6,736  | 4,719  | -1,427 |
| <i>all0567</i> | 3,175  | 2,224  | -1,427 |
| <i>alr1081</i> | 3,082  | 2,159  | -1,427 |
| <i>alr2335</i> | 2,977  | 2,086  | -1,427 |
| <i>all1175</i> | 2,386  | 1,671  | -1,427 |
| <i>alr3915</i> | 1,684  | 1,180  | -1,427 |
| <i>hetC</i>    | 1,006  | 0,705  | -1,427 |
| <i>all0262</i> | 20,365 | 14,268 | -1,427 |
| <i>all2077</i> | 17,227 | 12,069 | -1,427 |
| <i>alr3641</i> | 12,079 | 8,462  | -1,427 |
| <i>all0596</i> | 9,553  | 6,693  | -1,427 |
| <i>alr4259</i> | 6,959  | 4,876  | -1,427 |
| <i>alr0600</i> | 6,447  | 4,517  | -1,427 |
| <i>alr4646</i> | 6,447  | 4,517  | -1,427 |
| <i>alr1375</i> | 6,255  | 4,382  | -1,427 |
| <i>alr8011</i> | 5,531  | 3,875  | -1,427 |
| <i>alr1155</i> | 5,403  | 3,785  | -1,427 |
| <i>acpD</i>    | 5,052  | 3,540  | -1,427 |
| <i>alr0248</i> | 4,798  | 3,362  | -1,427 |
| <i>all4304</i> | 4,520  | 3,167  | -1,427 |
| <i>all0737</i> | 4,342  | 3,042  | -1,427 |
| <i>glmM</i>    | 4,246  | 2,975  | -1,427 |
| <i>alr0180</i> | 4,026  | 2,821  | -1,427 |
| <i>all2567</i> | 3,970  | 2,782  | -1,427 |
| <i>alr3703</i> | 3,892  | 2,727  | -1,427 |
| <i>alr4621</i> | 3,863  | 2,707  | -1,427 |
| <i>alr1687</i> | 3,562  | 2,496  | -1,427 |
| <i>alr7076</i> | 3,064  | 2,146  | -1,427 |
| <i>all3532</i> | 2,994  | 2,098  | -1,427 |
| <i>all1975</i> | 2,758  | 1,932  | -1,427 |
| <i>xseA</i>    | 2,544  | 1,783  | -1,427 |
| <i>alr2298</i> | 2,299  | 1,611  | -1,427 |
| <i>all5026</i> | 2,127  | 1,490  | -1,427 |
| <i>alr7147</i> | 2,060  | 1,444  | -1,427 |
| <i>all1316</i> | 2,005  | 1,405  | -1,427 |
| <i>all1068</i> | 0,890  | 0,623  | -1,427 |
| <i>all0665</i> | 1,650  | 1,156  | -1,427 |
| <i>ftsK</i>    | 1,447  | 1,014  | -1,427 |
| <i>all1780</i> | 1,424  | 0,000  | -1,424 |

|                |        |        |        |
|----------------|--------|--------|--------|
| <i>alr2587</i> | 1,424  | 0,000  | -1,424 |
| <i>all0638</i> | 1,422  | 0,000  | -1,422 |
| <i>all3792</i> | 41,247 | 29,009 | -1,422 |
| <i>ilvG</i>    | 27,668 | 19,482 | -1,420 |
| <i>prk</i>     | 59,252 | 41,756 | -1,419 |
| <i>sigE</i>    | 43,785 | 30,863 | -1,419 |
| <i>alr7211</i> | 1,418  | 0,000  | -1,418 |
| <i>cyaC</i>    | 3,838  | 2,707  | -1,418 |
| <i>all3024</i> | 1,415  | 0,000  | -1,415 |
| <i>alr2309</i> | 13,891 | 9,838  | -1,412 |
| <i>all1648</i> | 1,471  | 1,043  | -1,410 |
| <i>alr3176</i> | 14,874 | 10,551 | -1,410 |
| <i>alr0489</i> | 7,836  | 5,559  | -1,410 |
| <i>alr1364</i> | 6,578  | 4,666  | -1,410 |
| <i>prfA</i>    | 12,726 | 9,027  | -1,410 |
| <i>atp1</i>    | 86,384 | 61,352 | -1,408 |
| <i>hupC</i>    | 1,407  | 0,000  | -1,407 |
| <i>all0777</i> | 1,407  | 0,000  | -1,407 |
| <i>all4445</i> | 1,407  | 0,000  | -1,407 |
| <i>asr4747</i> | 1,407  | 0,000  | -1,407 |
| <i>alr5027</i> | 1,407  | 0,000  | -1,407 |
| <i>alr3442</i> | 4,180  | 2,976  | -1,405 |
| <i>all3295</i> | 62,949 | 44,814 | -1,405 |
| <i>alr1604</i> | 14,595 | 10,390 | -1,405 |
| <i>all3939</i> | 11,454 | 8,154  | -1,405 |
| <i>all0174</i> | 8,079  | 5,752  | -1,405 |
| <i>ftsH_3</i>  | 12,973 | 9,245  | -1,403 |
| <i>alr0577</i> | 29,542 | 21,067 | -1,402 |
| <i>all1272</i> | 7,238  | 5,167  | -1,401 |
| <i>all4035</i> | 5,276  | 3,766  | -1,401 |
| <i>alr1222</i> | 29,124 | 20,868 | -1,396 |
| <i>alr3281</i> | 19,075 | 13,668 | -1,396 |
| <i>alr4308</i> | 9,657  | 6,919  | -1,396 |
| <i>zwf</i>     | 5,037  | 3,609  | -1,396 |
| <i>alr0981</i> | 4,538  | 3,252  | -1,396 |
| <i>alr3965</i> | 4,491  | 3,218  | -1,396 |
| <i>alr3497</i> | 3,638  | 2,607  | -1,396 |
| <i>all2396</i> | 2,823  | 2,023  | -1,396 |
| <i>alr4703</i> | 2,277  | 1,632  | -1,396 |
| <i>alr1860</i> | 10,703 | 7,669  | -1,396 |
| <i>all5046</i> | 9,514  | 6,817  | -1,396 |
| <i>alr0264</i> | 8,450  | 6,055  | -1,396 |

|                |         |        |        |
|----------------|---------|--------|--------|
| <i>alr1966</i> | 7,298   | 5,229  | -1,396 |
| <i>all2349</i> | 7,149   | 5,122  | -1,396 |
| <i>alr3919</i> | 4,225   | 3,027  | -1,396 |
| <i>all5222</i> | 1,796   | 1,287  | -1,396 |
| <i>alr4273</i> | 1,319   | 0,945  | -1,396 |
| <i>alr1199</i> | 1,396   | 0,000  | -1,396 |
| <i>amt1</i>    | 36,112  | 25,932 | -1,393 |
| <i>asr0358</i> | 1,390   | 0,000  | -1,390 |
| <i>alr1013</i> | 1,390   | 0,000  | -1,390 |
| <i>asl1840</i> | 1,390   | 0,000  | -1,390 |
| <i>asl2733</i> | 1,390   | 0,000  | -1,390 |
| <i>asl8505</i> | 1,390   | 0,000  | -1,390 |
| <i>all4607</i> | 4,153   | 2,993  | -1,388 |
| <i>ssaA</i>    | 109,348 | 78,882 | -1,386 |
| <i>alr3817</i> | 24,342  | 17,560 | -1,386 |
| <i>chlP</i>    | 33,852  | 24,420 | -1,386 |
| <i>all3745</i> | 1,385   | 0,000  | -1,385 |
| <i>purC</i>    | 11,391  | 8,230  | -1,384 |
| <i>alr2745</i> | 9,158   | 6,616  | -1,384 |
| <i>petE</i>    | 110,923 | 80,196 | -1,383 |
| <i>all3964</i> | 15,454  | 11,214 | -1,378 |
| <i>ccmK_3</i>  | 59,150  | 42,983 | -1,376 |
| <i>all7008</i> | 10,468  | 7,616  | -1,374 |
| <i>all3298</i> | 9,199   | 6,693  | -1,374 |
| <i>accB</i>    | 8,294   | 6,035  | -1,374 |
| <i>alr1028</i> | 4,114   | 2,993  | -1,374 |
| <i>all4900</i> | 1,745   | 1,269  | -1,374 |
| <i>alr3416</i> | 8,774   | 6,383  | -1,374 |
| <i>all4575</i> | 7,725   | 5,620  | -1,374 |
| <i>all2461</i> | 6,761   | 4,919  | -1,374 |
| <i>all1353</i> | 5,364   | 3,902  | -1,374 |
| <i>alr3938</i> | 4,928   | 3,586  | -1,374 |
| <i>all1154</i> | 4,102   | 2,985  | -1,374 |
| <i>sigF</i>    | 3,882   | 2,824  | -1,374 |
| <i>all3107</i> | 3,739   | 2,720  | -1,374 |
| <i>alr7635</i> | 2,013   | 1,465  | -1,374 |
| <i>all0361</i> | 1,374   | 0,000  | -1,374 |
| <i>asl1679</i> | 1,374   | 0,000  | -1,374 |
| <i>asl2101</i> | 1,374   | 0,000  | -1,374 |
| <i>asl4860</i> | 1,374   | 0,000  | -1,374 |
| <i>alr7357</i> | 1,370   | 0,000  | -1,370 |
| <i>alr4672</i> | 10,445  | 7,645  | -1,366 |

|                |        |        |        |
|----------------|--------|--------|--------|
| <i>alr3351</i> | 8,603  | 6,297  | -1,366 |
| <i>desC_1</i>  | 6,415  | 4,719  | -1,359 |
| <i>all5210</i> | 1,123  | 0,826  | -1,359 |
| <i>alr1374</i> | 6,659  | 4,899  | -1,359 |
| <i>all4857</i> | 4,423  | 3,254  | -1,359 |
| <i>alr1147</i> | 1,551  | 1,141  | -1,359 |
| <i>all1252</i> | 1,358  | 0,000  | -1,358 |
| <i>asl1650</i> | 1,358  | 0,000  | -1,358 |
| <i>asr5183</i> | 1,358  | 0,000  | -1,358 |
| <i>asl7156</i> | 1,358  | 0,000  | -1,358 |
| <i>alr1285</i> | 9,086  | 6,704  | -1,355 |
| <i>all2303</i> | 12,472 | 9,203  | -1,355 |
| <i>chlH_1</i>  | 43,489 | 32,130 | -1,354 |
| <i>alr8019</i> | 9,091  | 6,717  | -1,353 |
| <i>alr1278</i> | 4,314  | 3,188  | -1,353 |
| <i>all3820</i> | 1,350  | 0,000  | -1,350 |
| <i>alr7513</i> | 1,350  | 0,000  | -1,350 |
| <i>cobN</i>    | 19,445 | 14,408 | -1,350 |
| <i>all4420</i> | 13,352 | 9,904  | -1,348 |
| <i>ccdA</i>    | 8,036  | 5,961  | -1,348 |
| <i>all4793</i> | 6,321  | 4,689  | -1,348 |
| <i>alr0965</i> | 4,118  | 3,055  | -1,348 |
| <i>alr2137</i> | 2,100  | 1,558  | -1,348 |
| <i>alr1254</i> | 2,030  | 1,506  | -1,348 |
| <i>alr4017</i> | 4,737  | 3,514  | -1,348 |
| <i>all4246</i> | 3,532  | 2,620  | -1,348 |
| <i>lrtA</i>    | 67,110 | 49,885 | -1,345 |
| <i>all3292</i> | 16,971 | 12,627 | -1,344 |
| <i>asl2794</i> | 1,342  | 0,000  | -1,342 |
| <i>alr7573</i> | 1,342  | 0,000  | -1,342 |
| <i>rpmB</i>    | 28,082 | 20,969 | -1,339 |
| <i>all1237</i> | 6,468  | 4,829  | -1,339 |
| <i>all1684</i> | 5,574  | 4,162  | -1,339 |
| <i>all0594</i> | 2,559  | 1,911  | -1,339 |
| <i>alr3165</i> | 1,337  | 0,000  | -1,337 |
| <i>all1980</i> | 19,460 | 14,558 | -1,337 |
| <i>alr3663</i> | 1,334  | 0,000  | -1,334 |
| <i>alr4178</i> | 12,804 | 9,611  | -1,332 |
| <i>cysA</i>    | 14,466 | 10,859 | -1,332 |
| <i>all3746</i> | 5,296  | 3,975  | -1,332 |
| <i>alr3443</i> | 3,429  | 2,574  | -1,332 |
| <i>alr3311</i> | 1,828  | 1,373  | -1,332 |

|                |         |         |        |
|----------------|---------|---------|--------|
| <i>all3346</i> | 1,716   | 1,288   | -1,332 |
| <i>all7128</i> | 0,795   | 0,597   | -1,332 |
| <i>infB</i>    | 52,542  | 39,466  | -1,331 |
| <i>alr3300</i> | 76,431  | 57,422  | -1,331 |
| <i>alr9005</i> | 1,331   | 0,000   | -1,331 |
| <i>gap2</i>    | 38,345  | 28,861  | -1,329 |
| <i>asl1789</i> | 1,327   | 0,000   | -1,327 |
| <i>alr5021</i> | 11,575  | 8,727   | -1,326 |
| <i>alr1593</i> | 21,391  | 16,158  | -1,324 |
| <i>rpsH</i>    | 21,784  | 16,483  | -1,322 |
| <i>rpsE</i>    | 16,680  | 12,621  | -1,322 |
| <i>alr1675</i> | 13,090  | 9,904   | -1,322 |
| <i>alr2355</i> | 8,019   | 6,068   | -1,322 |
| <i>alr0308</i> | 2,476   | 1,873   | -1,322 |
| <i>alr1121</i> | 1,510   | 1,143   | -1,322 |
| <i>sir</i>     | 13,810  | 10,461  | -1,320 |
| <i>all5091</i> | 20,497  | 15,579  | -1,316 |
| <i>alr0110</i> | 18,843  | 14,321  | -1,316 |
| <i>all4545</i> | 18,503  | 14,081  | -1,314 |
| <i>gmk</i>     | 16,930  | 12,884  | -1,314 |
| <i>por</i>     | 41,043  | 31,234  | -1,314 |
| <i>asl1165</i> | 1,312   | 0,000   | -1,312 |
| <i>all3713</i> | 1,312   | 0,000   | -1,312 |
| <i>asr8524</i> | 1,312   | 0,000   | -1,312 |
| <i>dnaK_4</i>  | 5,253   | 4,007   | -1,311 |
| <i>alr4176</i> | 14,114  | 10,787  | -1,308 |
| <i>ndhG</i>    | 20,131  | 15,414  | -1,306 |
| <i>alr4058</i> | 7,164   | 5,494   | -1,304 |
| <i>ccmK_1</i>  | 18,118  | 13,914  | -1,302 |
| <i>cpcE</i>    | 313,189 | 240,537 | -1,302 |
| <i>gyrB</i>    | 14,460  | 11,112  | -1,301 |
| <i>all1549</i> | 6,366   | 4,895   | -1,300 |
| <i>psbV</i>    | 30,614  | 23,568  | -1,299 |
| <i>all3651</i> | 10,041  | 7,730   | -1,299 |
| <i>all3895</i> | 9,138   | 7,042   | -1,298 |
| <i>all2754</i> | 1,297   | 0,000   | -1,297 |
| <i>all7226</i> | 1,297   | 0,000   | -1,297 |
| <i>alr9011</i> | 1,297   | 0,000   | -1,297 |
| <i>alr5283</i> | 24,661  | 19,040  | -1,295 |
| <i>alr0990</i> | 11,466  | 8,852   | -1,295 |
| <i>alr4057</i> | 10,650  | 8,241   | -1,292 |
| <i>leuA_2</i>  | 12,949  | 10,033  | -1,291 |



|                |         |         |        |
|----------------|---------|---------|--------|
| <i>alr4267</i> | 8,153   | 6,317   | -1,291 |
| <i>all3291</i> | 1,290   | 0,000   | -1,290 |
| <i>cpcA</i>    | 432,870 | 336,690 | -1,286 |
| <i>apcB</i>    | 376,787 | 293,588 | -1,283 |
| <i>asl8539</i> | 1,283   | 0,000   | -1,283 |
| <i>alr3543</i> | 19,144  | 14,940  | -1,281 |
| <i>chlB</i>    | 47,714  | 37,245  | -1,281 |
| <i>trpD_1</i>  | 1,280   | 0,000   | -1,280 |
| <i>alr2998</i> | 1,276   | 0,000   | -1,276 |
| <i>asl3262</i> | 22,894  | 18,045  | -1,269 |
| <i>asl3888</i> | 16,983  | 13,386  | -1,269 |
| <i>all0646</i> | 16,965  | 13,372  | -1,269 |
| <i>pbsY</i>    | 16,680  | 13,147  | -1,269 |
| <i>all4894</i> | 16,445  | 12,962  | -1,269 |
| <i>chlI</i>    | 13,700  | 10,798  | -1,269 |
| <i>alr4132</i> | 12,020  | 9,474   | -1,269 |
| <i>alr0784</i> | 11,120  | 8,765   | -1,269 |
| <i>tatA</i>    | 10,265  | 8,090   | -1,269 |
| <i>all1009</i> | 9,267   | 7,304   | -1,269 |
| <i>alr5059</i> | 8,860   | 6,983   | -1,269 |
| <i>asl0003</i> | 7,413   | 5,843   | -1,269 |
| <i>alr3725</i> | 6,487   | 5,113   | -1,269 |
| <i>all3940</i> | 6,442   | 5,077   | -1,269 |
| <i>all1762</i> | 6,248   | 4,925   | -1,269 |
| <i>all4403</i> | 6,135   | 4,835   | -1,269 |
| <i>all3179</i> | 6,099   | 4,807   | -1,269 |
| <i>rplR</i>    | 5,790   | 4,563   | -1,269 |
| <i>all3869</i> | 5,575   | 4,394   | -1,269 |
| <i>alr3798</i> | 5,307   | 4,183   | -1,269 |
| <i>alr3454</i> | 5,283   | 4,164   | -1,269 |
| <i>alr1004</i> | 4,891   | 3,855   | -1,269 |
| <i>eno</i>     | 4,888   | 3,852   | -1,269 |
| <i>all0362</i> | 4,272   | 3,367   | -1,269 |
| <i>alr3018</i> | 4,097   | 3,229   | -1,269 |
| <i>all3635</i> | 4,076   | 3,213   | -1,269 |
| <i>all3913</i> | 3,971   | 3,130   | -1,269 |
| <i>asl0163</i> | 3,958   | 3,120   | -1,269 |
| <i>asr3783</i> | 3,892   | 3,068   | -1,269 |
| <i>all4382</i> | 3,742   | 2,950   | -1,269 |
| <i>all0470</i> | 3,707   | 2,922   | -1,269 |
| <i>alr0552</i> | 3,687   | 2,906   | -1,269 |
| <i>alr7337</i> | 3,593   | 2,832   | -1,269 |

|                |       |       |        |
|----------------|-------|-------|--------|
| <i>alr9504</i> | 3,583 | 2,824 | -1,269 |
| <i>asl3383</i> | 3,538 | 2,789 | -1,269 |
| <i>all0844</i> | 3,434 | 2,707 | -1,269 |
| <i>asl3438</i> | 3,384 | 2,667 | -1,269 |
| <i>chlG</i>    | 3,384 | 2,667 | -1,269 |
| <i>asr0757</i> | 3,336 | 2,629 | -1,269 |
| <i>asl1421</i> | 3,289 | 2,592 | -1,269 |
| <i>asl4903</i> | 3,243 | 2,556 | -1,269 |
| <i>all2992</i> | 3,221 | 2,539 | -1,269 |
| <i>alr0613</i> | 2,994 | 2,360 | -1,269 |
| <i>ndhD_5</i>  | 2,914 | 2,297 | -1,269 |
| <i>all0927</i> | 2,857 | 2,251 | -1,269 |
| <i>all3044</i> | 2,831 | 2,231 | -1,269 |
| <i>tynA</i>    | 2,826 | 2,228 | -1,269 |
| <i>all1766</i> | 2,797 | 2,204 | -1,269 |
| <i>all1875</i> | 2,786 | 2,196 | -1,269 |
| <i>asr1559</i> | 2,780 | 2,191 | -1,269 |
| <i>alr1260</i> | 2,654 | 2,092 | -1,269 |
| <i>xseB</i>    | 2,624 | 2,068 | -1,269 |
| <i>alr0480</i> | 2,548 | 2,008 | -1,269 |
| <i>asl1394</i> | 2,538 | 2,001 | -1,269 |
| <i>asl4654</i> | 2,538 | 2,001 | -1,269 |
| <i>asl4565</i> | 2,511 | 1,979 | -1,269 |
| <i>all0415</i> | 2,506 | 1,975 | -1,269 |
| <i>alr4009</i> | 2,502 | 1,972 | -1,269 |
| <i>asr1734</i> | 2,484 | 1,958 | -1,269 |
| <i>alr1721</i> | 2,445 | 1,927 | -1,269 |
| <i>all2700</i> | 2,359 | 1,859 | -1,269 |
| <i>asl4507</i> | 2,359 | 1,859 | -1,269 |
| <i>alr0511</i> | 2,347 | 1,850 | -1,269 |
| <i>all2423</i> | 2,335 | 1,841 | -1,269 |
| <i>alr4864</i> | 2,335 | 1,841 | -1,269 |
| <i>all0314</i> | 2,312 | 1,822 | -1,269 |
| <i>all0783</i> | 2,260 | 1,781 | -1,269 |
| <i>alr1026</i> | 2,235 | 1,761 | -1,269 |
| <i>all4981</i> | 2,166 | 1,707 | -1,269 |
| <i>alr3917</i> | 2,085 | 1,643 | -1,269 |
| <i>alr1349</i> | 1,979 | 1,560 | -1,269 |
| <i>alr2746</i> | 1,979 | 1,560 | -1,269 |
| <i>alr3015</i> | 1,979 | 1,560 | -1,269 |
| <i>all1471</i> | 1,954 | 1,540 | -1,269 |
| <i>all1597</i> | 1,946 | 1,534 | -1,269 |

|                |       |       |        |
|----------------|-------|-------|--------|
| <i>all1151</i> | 1,938 | 1,527 | -1,269 |
| <i>all3924</i> | 1,928 | 1,519 | -1,269 |
| <i>alr7295</i> | 1,901 | 1,498 | -1,269 |
| <i>alr3103</i> | 1,893 | 1,492 | -1,269 |
| <i>all7031</i> | 1,853 | 1,461 | -1,269 |
| <i>xisF</i>    | 1,814 | 1,430 | -1,269 |
| <i>all1829</i> | 1,769 | 1,394 | -1,269 |
| <i>all3991</i> | 1,769 | 1,394 | -1,269 |
| <i>alr7307</i> | 1,769 | 1,394 | -1,269 |
| <i>all1059</i> | 1,738 | 1,370 | -1,269 |
| <i>alr3052</i> | 1,736 | 1,368 | -1,269 |
| <i>alr4435</i> | 1,692 | 1,334 | -1,269 |
| <i>all3167</i> | 1,664 | 1,312 | -1,269 |
| <i>all1022</i> | 1,633 | 1,287 | -1,269 |
| <i>all7109</i> | 1,622 | 1,278 | -1,269 |
| <i>all1391</i> | 1,610 | 1,269 | -1,269 |
| <i>all7332</i> | 1,610 | 1,269 | -1,269 |
| <i>all2068</i> | 1,497 | 1,180 | -1,269 |
| <i>alr1337</i> | 1,487 | 1,172 | -1,269 |
| <i>all4097</i> | 1,450 | 1,143 | -1,269 |
| <i>alr5326</i> | 1,450 | 1,143 | -1,269 |
| <i>all7236</i> | 1,390 | 1,096 | -1,269 |
| <i>all1820</i> | 1,387 | 1,093 | -1,269 |
| <i>alr0074</i> | 1,378 | 1,086 | -1,269 |
| <i>alr1727</i> | 1,366 | 1,076 | -1,269 |
| <i>all1473</i> | 1,327 | 1,046 | -1,269 |
| <i>alr0568</i> | 1,312 | 1,034 | -1,269 |
| <i>alr0508</i> | 1,242 | 0,979 | -1,269 |
| <i>all3132</i> | 1,223 | 0,964 | -1,269 |
| <i>all1523</i> | 1,207 | 0,951 | -1,269 |
| <i>all4825</i> | 1,204 | 0,949 | -1,269 |
| <i>alr7096</i> | 1,204 | 0,949 | -1,269 |
| <i>alr7068</i> | 1,168 | 0,920 | -1,269 |
| <i>all3131</i> | 1,150 | 0,907 | -1,269 |
| <i>all0071</i> | 1,123 | 0,885 | -1,269 |
| <i>alr1712</i> | 1,094 | 0,862 | -1,269 |
| <i>alr1999</i> | 1,076 | 0,848 | -1,269 |
| <i>alr0447</i> | 1,052 | 0,829 | -1,269 |
| <i>all3084</i> | 1,047 | 0,825 | -1,269 |
| <i>all7521</i> | 1,029 | 0,811 | -1,269 |
| <i>all4998</i> | 1,024 | 0,807 | -1,269 |
| <i>alr5095</i> | 1,015 | 0,800 | -1,269 |

|                |        |        |        |
|----------------|--------|--------|--------|
| <i>all0886</i> | 1,009  | 0,795  | -1,269 |
| <i>all1882</i> | 0,998  | 0,787  | -1,269 |
| <i>all0032</i> | 0,989  | 0,780  | -1,269 |
| <i>all0325</i> | 0,953  | 0,751  | -1,269 |
| <i>all0327</i> | 0,898  | 0,708  | -1,269 |
| <i>alr4597</i> | 0,885  | 0,697  | -1,269 |
| <i>alr2104</i> | 0,881  | 0,695  | -1,269 |
| <i>all3630</i> | 0,868  | 0,684  | -1,269 |
| <i>ksgA</i>    | 0,859  | 0,677  | -1,269 |
| <i>all0061</i> | 0,840  | 0,662  | -1,269 |
| <i>alr7336</i> | 0,811  | 0,639  | -1,269 |
| <i>all0419</i> | 0,768  | 0,605  | -1,269 |
| <i>alr0587</i> | 0,748  | 0,590  | -1,269 |
| <i>alr3756</i> | 0,745  | 0,587  | -1,269 |
| <i>alr4915</i> | 0,744  | 0,586  | -1,269 |
| <i>alr3068</i> | 0,737  | 0,581  | -1,269 |
| <i>all7011</i> | 0,721  | 0,568  | -1,269 |
| <i>all2688</i> | 0,710  | 0,559  | -1,269 |
| <i>alr3020</i> | 0,706  | 0,556  | -1,269 |
| <i>all3270</i> | 0,699  | 0,551  | -1,269 |
| <i>all5345</i> | 0,699  | 0,551  | -1,269 |
| <i>alr1583</i> | 0,697  | 0,549  | -1,269 |
| <i>all7592</i> | 0,644  | 0,508  | -1,269 |
| <i>cyaA</i>    | 0,635  | 0,500  | -1,269 |
| <i>all3764</i> | 0,631  | 0,497  | -1,269 |
| <i>all2477</i> | 0,602  | 0,474  | -1,269 |
| <i>all0808</i> | 0,600  | 0,473  | -1,269 |
| <i>all5131</i> | 0,579  | 0,457  | -1,269 |
| <i>all4832</i> | 0,543  | 0,428  | -1,269 |
| <i>alr5236</i> | 0,513  | 0,405  | -1,269 |
| <i>alr7647</i> | 0,495  | 0,390  | -1,269 |
| <i>cls</i>     | 0,485  | 0,383  | -1,269 |
| <i>all1186</i> | 0,480  | 0,379  | -1,269 |
| <i>alr8530</i> | 0,405  | 0,320  | -1,269 |
| <i>all0323</i> | 0,387  | 0,305  | -1,269 |
| <i>alr5331</i> | 0,285  | 0,225  | -1,269 |
| <i>all3465</i> | 0,209  | 0,164  | -1,269 |
| <i>rplQ</i>    | 21,955 | 17,305 | -1,269 |
| <i>all1542</i> | 15,066 | 11,875 | -1,269 |
| <i>asr0855</i> | 13,900 | 10,956 | -1,269 |
| <i>alr4661</i> | 13,810 | 10,885 | -1,269 |
| <i>alr1892</i> | 12,854 | 10,132 | -1,269 |

|                |        |       |        |
|----------------|--------|-------|--------|
| <i>asr4648</i> | 11,824 | 9,319 | -1,269 |
| <i>alr4100</i> | 11,391 | 8,978 | -1,269 |
| <i>rpmH</i>    | 10,379 | 8,180 | -1,269 |
| <i>trpG</i>    | 8,836  | 6,964 | -1,269 |
| <i>rbfA</i>    | 8,714  | 6,868 | -1,269 |
| <i>all3600</i> | 8,714  | 6,868 | -1,269 |
| <i>asl4262</i> | 8,649  | 6,817 | -1,269 |
| <i>all5176</i> | 8,585  | 6,767 | -1,269 |
| <i>recR</i>    | 8,570  | 6,754 | -1,269 |
| <i>alr1957</i> | 8,400  | 6,621 | -1,269 |
| <i>crtQ</i>    | 8,271  | 6,519 | -1,269 |
| <i>all0298</i> | 7,473  | 5,890 | -1,269 |
| <i>all0754</i> | 7,298  | 5,752 | -1,269 |
| <i>alr2373</i> | 6,311  | 4,975 | -1,269 |
| <i>all2611</i> | 6,269  | 4,941 | -1,269 |
| <i>asl3868</i> | 5,912  | 4,660 | -1,269 |
| <i>all4804</i> | 5,875  | 4,630 | -1,269 |
| <i>alr2083</i> | 5,161  | 4,068 | -1,269 |
| <i>fdxB</i>    | 4,766  | 3,756 | -1,269 |
| <i>alr0252</i> | 4,448  | 3,506 | -1,269 |
| <i>alr2925</i> | 4,351  | 3,430 | -1,269 |
| <i>alr5068</i> | 4,324  | 3,408 | -1,269 |
| <i>all4341</i> | 4,133  | 3,258 | -1,269 |
| <i>alr1979</i> | 4,050  | 3,192 | -1,269 |
| <i>all3191</i> | 4,003  | 3,155 | -1,269 |
| <i>alr1334</i> | 3,807  | 3,001 | -1,269 |
| <i>prmA</i>    | 3,803  | 2,998 | -1,269 |
| <i>alr2376</i> | 3,460  | 2,727 | -1,269 |
| <i>nrtA_2</i>  | 3,274  | 2,580 | -1,269 |
| <i>asr3390</i> | 3,199  | 2,521 | -1,269 |
| <i>alr4439</i> | 3,177  | 2,504 | -1,269 |
| <i>alr4701</i> | 3,156  | 2,487 | -1,269 |
| <i>all5042</i> | 3,135  | 2,471 | -1,269 |
| <i>all4789</i> | 3,121  | 2,460 | -1,269 |
| <i>asr2468</i> | 3,033  | 2,390 | -1,269 |
| <i>alr4129</i> | 2,979  | 2,348 | -1,269 |
| <i>asl2197</i> | 2,956  | 2,330 | -1,269 |
| <i>all4070</i> | 2,956  | 2,330 | -1,269 |
| <i>all1771</i> | 2,931  | 2,310 | -1,269 |
| <i>alr7203</i> | 2,919  | 2,301 | -1,269 |
| <i>asl0027</i> | 2,848  | 2,245 | -1,269 |
| <i>alr0359</i> | 2,814  | 2,218 | -1,269 |

|                |       |       |        |
|----------------|-------|-------|--------|
| <i>alr4067</i> | 2,814 | 2,218 | -1,269 |
| <i>argS</i>    | 2,775 | 2,187 | -1,269 |
| <i>all4440</i> | 2,700 | 2,128 | -1,269 |
| <i>asl4353</i> | 2,684 | 2,116 | -1,269 |
| <i>all8564</i> | 2,609 | 2,057 | -1,269 |
| <i>alr2773</i> | 2,458 | 1,937 | -1,269 |
| <i>alr0279</i> | 2,395 | 1,888 | -1,269 |
| <i>all4102</i> | 2,383 | 1,878 | -1,269 |
| <i>all1075</i> | 2,375 | 1,872 | -1,269 |
| <i>alr5270</i> | 2,219 | 1,749 | -1,269 |
| <i>all1719</i> | 2,203 | 1,736 | -1,269 |
| <i>all0736</i> | 2,142 | 1,689 | -1,269 |
| <i>all5264</i> | 2,113 | 1,666 | -1,269 |
| <i>alr3806</i> | 2,071 | 1,632 | -1,269 |
| <i>all5022</i> | 1,971 | 1,553 | -1,269 |
| <i>alr8563</i> | 1,962 | 1,547 | -1,269 |
| <i>alr3066</i> | 1,858 | 1,465 | -1,269 |
| <i>all0469</i> | 1,845 | 1,454 | -1,269 |
| <i>all3446</i> | 1,824 | 1,438 | -1,269 |
| <i>alr0277</i> | 1,783 | 1,405 | -1,269 |
| <i>all1806</i> | 1,783 | 1,405 | -1,269 |
| <i>alr2132</i> | 1,783 | 1,405 | -1,269 |
| <i>all4128</i> | 1,766 | 1,392 | -1,269 |
| <i>all4651</i> | 1,756 | 1,384 | -1,269 |
| <i>all4478</i> | 1,656 | 1,305 | -1,269 |
| <i>all2622</i> | 1,627 | 1,283 | -1,269 |
| <i>mazF</i>    | 1,589 | 1,252 | -1,269 |
| <i>alr4158</i> | 1,581 | 1,246 | -1,269 |
| <i>alr3158</i> | 1,567 | 1,235 | -1,269 |
| <i>all3022</i> | 1,516 | 1,195 | -1,269 |
| <i>all7597</i> | 1,478 | 1,165 | -1,269 |
| <i>all1737</i> | 1,446 | 1,140 | -1,269 |
| <i>alr1350</i> | 1,297 | 1,023 | -1,269 |
| <i>hoxF</i>    | 1,285 | 1,013 | -1,269 |
| <i>alr1086</i> | 1,232 | 0,971 | -1,269 |
| <i>alr1874</i> | 1,216 | 0,959 | -1,269 |
| <i>alr1302</i> | 1,210 | 0,954 | -1,269 |
| <i>all1932</i> | 1,194 | 0,941 | -1,269 |
| <i>alr7350</i> | 1,148 | 0,904 | -1,269 |
| <i>alr1852</i> | 1,112 | 0,876 | -1,269 |
| <i>all8508</i> | 1,104 | 0,870 | -1,269 |
| <i>alr4587</i> | 1,091 | 0,860 | -1,269 |

|                |         |         |        |
|----------------|---------|---------|--------|
| <i>all4978</i> | 1,038   | 0,818   | -1,269 |
| <i>all2912</i> | 0,942   | 0,742   | -1,269 |
| <i>all0902</i> | 0,938   | 0,739   | -1,269 |
| <i>all3198</i> | 0,938   | 0,739   | -1,269 |
| <i>all3011</i> | 0,902   | 0,711   | -1,269 |
| <i>all3853</i> | 0,902   | 0,711   | -1,269 |
| <i>alr2838</i> | 0,891   | 0,703   | -1,269 |
| <i>alr4631</i> | 0,875   | 0,689   | -1,269 |
| <i>trpC_2</i>  | 0,828   | 0,653   | -1,269 |
| <i>all0903</i> | 0,814   | 0,641   | -1,269 |
| <i>dmnB</i>    | 0,794   | 0,626   | -1,269 |
| <i>all2801</i> | 0,789   | 0,622   | -1,269 |
| <i>alr2987</i> | 0,758   | 0,598   | -1,269 |
| <i>all3047</i> | 0,741   | 0,584   | -1,269 |
| <i>alr4629</i> | 0,739   | 0,582   | -1,269 |
| <i>all0910</i> | 0,679   | 0,535   | -1,269 |
| <i>all7098</i> | 0,629   | 0,496   | -1,269 |
| <i>all4423</i> | 0,615   | 0,484   | -1,269 |
| <i>alr1448</i> | 0,607   | 0,478   | -1,269 |
| <i>all7682</i> | 0,597   | 0,471   | -1,269 |
| <i>all3244</i> | 0,591   | 0,466   | -1,269 |
| <i>hisZ</i>    | 0,577   | 0,454   | -1,269 |
| <i>all2950</i> | 0,577   | 0,454   | -1,269 |
| <i>alr5319</i> | 0,519   | 0,409   | -1,269 |
| <i>all0824</i> | 0,466   | 0,367   | -1,269 |
| <i>all7191</i> | 0,439   | 0,346   | -1,269 |
| <i>all4413</i> | 0,314   | 0,248   | -1,269 |
| <i>hglE_1</i>  | 0,185   | 0,146   | -1,269 |
| <i>all3289</i> | 0,181   | 0,143   | -1,269 |
| <i>all0261</i> | 1,265   | 0,000   | -1,265 |
| <i>all4735</i> | 1,262   | 0,000   | -1,262 |
| <i>alr7125</i> | 1,262   | 0,000   | -1,262 |
| <i>alr7202</i> | 1,262   | 0,000   | -1,262 |
| <i>psaC</i>    | 229,250 | 181,813 | -1,261 |
| <i>atpB</i>    | 65,270  | 51,826  | -1,259 |
| <i>all3697</i> | 1,255   | 0,000   | -1,255 |
| <i>asr5312</i> | 1,255   | 0,000   | -1,255 |
| <i>mraY</i>    | 28,086  | 22,385  | -1,255 |
| <i>psbO</i>    | 60,511  | 48,365  | -1,251 |
| <i>alr2308</i> | 18,364  | 14,690  | -1,250 |
| <i>all0860</i> | 15,782  | 12,650  | -1,248 |
| <i>all4464</i> | 25,572  | 20,535  | -1,245 |

|                |         |         |        |
|----------------|---------|---------|--------|
| <i>all1267</i> | 6,524   | 5,247   | -1,243 |
| <i>asl0628</i> | 1,242   | 0,000   | -1,242 |
| <i>asr3878</i> | 1,242   | 0,000   | -1,242 |
| <i>alr0188</i> | 14,636  | 11,792  | -1,241 |
| <i>all0478</i> | 2,938   | 2,369   | -1,240 |
| <i>cytA</i>    | 40,658  | 32,867  | -1,237 |
| <i>trxA</i>    | 42,164  | 34,085  | -1,237 |
| <i>pecB</i>    | 486,617 | 393,649 | -1,236 |
| <i>all2480</i> | 1,233   | 0,000   | -1,233 |
| <i>ccmK_2</i>  | 40,780  | 33,157  | -1,230 |
| <i>all7564</i> | 1,229   | 0,000   | -1,229 |
| <i>rpoC2</i>   | 15,384  | 12,534  | -1,227 |
| <i>nusA</i>    | 7,949   | 6,481   | -1,226 |
| <i>alr4380</i> | 20,710  | 16,886  | -1,226 |
| <i>all4110</i> | 1,226   | 0,000   | -1,226 |
| <i>all3563</i> | 5,036   | 4,116   | -1,223 |
| <i>hisD_1</i>  | 13,990  | 11,451  | -1,222 |
| <i>all5258</i> | 13,268  | 10,876  | -1,220 |
| <i>alr2759</i> | 7,409   | 6,073   | -1,220 |
| <i>alr2326</i> | 5,366   | 4,398   | -1,220 |
| <i>all3986</i> | 56,787  | 46,585  | -1,219 |
| <i>alr5257</i> | 13,942  | 11,446  | -1,218 |
| <i>alr0124</i> | 5,004   | 4,108   | -1,218 |
| <i>asl1664</i> | 1,216   | 0,000   | -1,216 |
| <i>asr7023</i> | 1,216   | 0,000   | -1,216 |
| <i>all0333</i> | 22,953  | 18,878  | -1,216 |
| <i>all4162</i> | 12,608  | 10,369  | -1,216 |
| <i>alr4566</i> | 1,213   | 0,000   | -1,213 |
| <i>alr1223</i> | 33,847  | 27,931  | -1,212 |
| <i>asl3981</i> | 68,111  | 56,240  | -1,211 |
| <i>pyrG</i>    | 4,491   | 3,708   | -1,211 |
| <i>alr0103</i> | 3,144   | 2,596   | -1,211 |
| <i>all8519</i> | 2,929   | 2,419   | -1,211 |
| <i>all3558</i> | 2,912   | 2,405   | -1,211 |
| <i>all7618</i> | 2,315   | 1,912   | -1,211 |
| <i>alr0559</i> | 1,210   | 0,000   | -1,210 |
| <i>dmnC</i>    | 1,210   | 0,000   | -1,210 |
| <i>secA</i>    | 17,433  | 14,432  | -1,208 |
| <i>all1140</i> | 7,065   | 5,862   | -1,205 |
| <i>all4668</i> | 3,954   | 3,281   | -1,205 |
| <i>asl0550</i> | 30,390  | 25,213  | -1,205 |
| <i>acpP</i>    | 26,100  | 21,654  | -1,205 |



|                |        |        |        |
|----------------|--------|--------|--------|
| <i>alr1566</i> | 1,204  | 0,000  | -1,204 |
| <i>alr8556</i> | 1,204  | 0,000  | -1,204 |
| <i>all0284</i> | 2,455  | 2,043  | -1,202 |
| <i>alr1482</i> | 5,251  | 4,382  | -1,198 |
| <i>dnaJ_5</i>  | 5,943  | 4,960  | -1,198 |
| <i>alr3867</i> | 4,269  | 3,562  | -1,198 |
| <i>alr0145</i> | 13,233 | 11,043 | -1,198 |
| <i>all0111</i> | 18,758 | 15,690 | -1,196 |
| <i>all0909</i> | 1,196  | 0,000  | -1,196 |
| <i>alr7640</i> | 1,196  | 0,000  | -1,196 |
| <i>all2707</i> | 9,353  | 7,832  | -1,194 |
| <i>all2342</i> | 21,188 | 17,766 | -1,193 |
| <i>all0462</i> | 2,999  | 2,514  | -1,193 |
| <i>alr7228</i> | 53,890 | 45,215 | -1,192 |
| <i>alr7019</i> | 1,191  | 0,000  | -1,191 |
| <i>all7150</i> | 1,191  | 0,000  | -1,191 |
| <i>cpcF</i>    | 34,854 | 29,303 | -1,189 |
| <i>all2193</i> | 8,670  | 7,289  | -1,189 |
| <i>alr2076</i> | 6,487  | 5,454  | -1,189 |
| <i>alr0140</i> | 6,334  | 5,325  | -1,189 |
| <i>all3118</i> | 4,220  | 3,548  | -1,189 |
| <i>all5280</i> | 2,272  | 1,910  | -1,189 |
| <i>all1893</i> | 16,523 | 13,891 | -1,189 |
| <i>petC_3</i>  | 37,623 | 31,699 | -1,187 |
| <i>alr1159</i> | 14,943 | 12,599 | -1,186 |
| <i>all2651</i> | 1,185  | 0,000  | -1,185 |
| <i>chlL</i>    | 45,250 | 38,213 | -1,184 |
| <i>alr2708</i> | 9,476  | 8,002  | -1,184 |
| <i>alr3376</i> | 5,838  | 4,930  | -1,184 |
| <i>alr0092</i> | 7,623  | 6,448  | -1,182 |
| <i>alr4571</i> | 14,362 | 12,159 | -1,181 |
| <i>asr3308</i> | 1,179  | 0,000  | -1,179 |
| <i>asl4244</i> | 1,179  | 0,000  | -1,179 |
| <i>asl5170</i> | 1,179  | 0,000  | -1,179 |
| <i>all8565</i> | 1,179  | 0,000  | -1,179 |
| <i>all3680</i> | 21,809 | 18,512 | -1,178 |
| <i>all3326</i> | 7,589  | 6,442  | -1,178 |
| <i>zam</i>     | 23,233 | 19,720 | -1,178 |
| <i>asr3294</i> | 16,499 | 14,004 | -1,178 |
| <i>aroE_2</i>  | 5,364  | 4,553  | -1,178 |
| <i>alr7325</i> | 3,757  | 3,189  | -1,178 |
| <i>all2654</i> | 1,070  | 0,909  | -1,178 |

|                |         |         |        |
|----------------|---------|---------|--------|
| <i>all3282</i> | 9,730   | 8,259   | -1,178 |
| <i>cpcB</i>    | 432,821 | 368,115 | -1,176 |
| <i>atpD</i>    | 23,479  | 20,006  | -1,174 |
| <i>alr5254</i> | 1,172   | 0,000   | -1,172 |
| <i>alr4056</i> | 50,040  | 42,728  | -1,171 |
| <i>alr0099</i> | 17,139  | 14,635  | -1,171 |
| <i>all0144</i> | 9,279   | 7,923   | -1,171 |
| <i>hlyB</i>    | 2,871   | 2,452   | -1,171 |
| <i>clpB_2</i>  | 3,181   | 2,716   | -1,171 |
| <i>alr7212</i> | 1,171   | 0,000   | -1,171 |
| <i>all3143</i> | 9,160   | 7,829   | -1,170 |
| <i>all0292</i> | 1,168   | 0,000   | -1,168 |
| <i>alr5181</i> | 1,168   | 0,000   | -1,168 |
| <i>all7627</i> | 1,168   | 0,000   | -1,168 |
| <i>alr1525</i> | 109,738 | 94,104  | -1,166 |
| <i>rplE</i>    | 21,055  | 18,104  | -1,163 |
| <i>smtB</i>    | 9,375   | 8,061   | -1,163 |
| <i>alr2054</i> | 4,014   | 3,451   | -1,163 |
| <i>all3149</i> | 4,014   | 3,451   | -1,163 |
| <i>all2343</i> | 14,011  | 12,047  | -1,163 |
| <i>alr0116</i> | 6,587   | 5,663   | -1,163 |
| <i>alr4714</i> | 5,512   | 4,740   | -1,163 |
| <i>alr8535</i> | 5,397   | 4,640   | -1,163 |
| <i>alr3824</i> | 4,810   | 4,136   | -1,163 |
| <i>alr1052</i> | 4,384   | 3,769   | -1,163 |
| <i>alr4907</i> | 4,184   | 3,597   | -1,163 |
| <i>alr5279</i> | 3,734   | 3,210   | -1,163 |
| <i>all0797</i> | 3,538   | 3,042   | -1,163 |
| <i>aroB_2</i>  | 3,528   | 3,034   | -1,163 |
| <i>aroA</i>    | 3,015   | 2,592   | -1,163 |
| <i>all1678</i> | 2,579   | 2,218   | -1,163 |
| <i>all3313</i> | 2,289   | 1,969   | -1,163 |
| <i>all3516</i> | 1,740   | 1,496   | -1,163 |
| <i>alr0735</i> | 1,162   | 0,000   | -1,162 |
| <i>apcA_1</i>  | 441,818 | 380,612 | -1,161 |
| <i>all1351</i> | 48,261  | 41,720  | -1,157 |
| <i>ureA</i>    | 1,156   | 0,000   | -1,156 |
| <i>all5337</i> | 1,156   | 0,000   | -1,156 |
| <i>alr3115</i> | 2,319   | 2,011   | -1,153 |
| <i>asnC</i>    | 5,033   | 4,363   | -1,153 |
| <i>alr0849</i> | 4,561   | 3,954   | -1,153 |
| <i>all4248</i> | 2,757   | 2,390   | -1,153 |

|                |        |        |        |
|----------------|--------|--------|--------|
| <i>pecE</i>    | 40,912 | 35,507 | -1,152 |
| <i>all2379</i> | 2,518  | 2,190  | -1,150 |
| <i>all7158</i> | 13,450 | 11,729 | -1,147 |
| <i>alr4579</i> | 7,249  | 6,322  | -1,147 |
| <i>mutS</i>    | 6,868  | 5,989  | -1,147 |
| <i>alr4745</i> | 11,529 | 10,054 | -1,147 |
| <i>alr1744</i> | 22,442 | 19,601 | -1,145 |
| <i>alr1571</i> | 1,145  | 0,000  | -1,145 |
| <i>asl5128</i> | 25,630 | 22,446 | -1,142 |
| <i>alr1746</i> | 17,227 | 15,087 | -1,142 |
| <i>asr1494</i> | 12,661 | 11,088 | -1,142 |
| <i>all0048</i> | 10,404 | 9,112  | -1,142 |
| <i>all2288</i> | 9,164  | 8,026  | -1,142 |
| <i>all2977</i> | 8,407  | 7,362  | -1,142 |
| <i>alr3172</i> | 7,842  | 6,868  | -1,142 |
| <i>alr1906</i> | 7,823  | 6,851  | -1,142 |
| <i>alr3339</i> | 7,231  | 6,332  | -1,142 |
| <i>alr4373</i> | 6,913  | 6,055  | -1,142 |
| <i>alr0517</i> | 6,447  | 5,646  | -1,142 |
| <i>dnaJ_2</i>  | 5,575  | 4,882  | -1,142 |
| <i>all2849</i> | 5,307  | 4,648  | -1,142 |
| <i>uvrB</i>    | 4,734  | 4,145  | -1,142 |
| <i>all2917</i> | 3,878  | 3,396  | -1,142 |
| <i>mraW</i>    | 3,468  | 3,037  | -1,142 |
| <i>alr0309</i> | 2,994  | 2,622  | -1,142 |
| <i>alr3210</i> | 2,614  | 2,289  | -1,142 |
| <i>alr1096</i> | 2,496  | 2,186  | -1,142 |
| <i>alr3473</i> | 1,352  | 1,184  | -1,142 |
| <i>alr1137</i> | 9,730  | 8,521  | -1,142 |
| <i>alr4288</i> | 9,641  | 8,443  | -1,142 |
| <i>alr0507</i> | 5,321  | 4,660  | -1,142 |
| <i>rnhB</i>    | 4,650  | 4,072  | -1,142 |
| <i>all0589</i> | 3,128  | 2,739  | -1,142 |
| <i>all2460</i> | 2,461  | 2,155  | -1,142 |
| <i>all1872</i> | 87,339 | 76,691 | -1,139 |
| <i>nifK</i>    | 1,138  | 0,000  | -1,138 |
| <i>all1784</i> | 1,137  | 0,000  | -1,137 |
| <i>glnA</i>    | 33,922 | 29,837 | -1,137 |
| <i>alr0101</i> | 38,770 | 34,111 | -1,137 |
| <i>all0772</i> | 1,134  | 0,000  | -1,134 |
| <i>all0868</i> | 1,134  | 0,000  | -1,134 |
| <i>hepK</i>    | 5,068  | 4,474  | -1,133 |

|                |        |        |        |
|----------------|--------|--------|--------|
| <i>all5250</i> | 8,064  | 7,118  | -1,133 |
| <i>rpoB</i>    | 24,033 | 21,300 | -1,128 |
| <i>all3962</i> | 1,128  | 0,000  | -1,128 |
| <i>ndhF_3</i>  | 1,128  | 0,000  | -1,128 |
| <i>all7351</i> | 1,128  | 0,000  | -1,128 |
| <i>all7255</i> | 7,473  | 6,626  | -1,128 |
| <i>asl3112</i> | 22,783 | 20,201 | -1,128 |
| <i>all1761</i> | 14,886 | 13,199 | -1,128 |
| <i>ntcA</i>    | 8,340  | 7,395  | -1,128 |
| <i>cbiM_1</i>  | 8,158  | 7,234  | -1,128 |
| <i>secF</i>    | 5,731  | 5,081  | -1,128 |
| <i>alr1605</i> | 4,852  | 4,303  | -1,128 |
| <i>alr3871</i> | 3,714  | 3,293  | -1,128 |
| <i>alr7649</i> | 0,724  | 0,642  | -1,128 |
| <i>alr7231</i> | 59,974 | 53,436 | -1,122 |
| <i>atpC_2</i>  | 19,460 | 17,339 | -1,122 |
| <i>all3971</i> | 14,715 | 13,111 | -1,122 |
| <i>rplU</i>    | 26,739 | 23,885 | -1,119 |
| <i>patN</i>    | 16,217 | 14,486 | -1,119 |
| <i>all7229</i> | 90,713 | 81,043 | -1,119 |
| <i>all3459</i> | 18,407 | 16,457 | -1,118 |
| <i>alr8077</i> | 12,204 | 10,919 | -1,118 |
| <i>all8024</i> | 33,434 | 30,001 | -1,114 |
| <i>gltS</i>    | 10,778 | 9,675  | -1,114 |
| <i>all4415</i> | 1,112  | 0,000  | -1,112 |
| <i>all4519</i> | 1,112  | 0,000  | -1,112 |
| <i>all0216</i> | 21,893 | 19,720 | -1,110 |
| <i>all2062</i> | 13,971 | 12,585 | -1,110 |
| <i>all3748</i> | 6,169  | 5,556  | -1,110 |
| <i>alr3640</i> | 4,541  | 4,090  | -1,110 |
| <i>all5244</i> | 3,132  | 2,821  | -1,110 |
| <i>all2644</i> | 0,312  | 0,281  | -1,110 |
| <i>asl7159</i> | 8,426  | 7,590  | -1,110 |
| <i>rps1_2</i>  | 8,013  | 7,218  | -1,110 |
| <i>alr2494</i> | 7,201  | 6,487  | -1,110 |
| <i>alr3818</i> | 6,361  | 5,729  | -1,110 |
| <i>all4633</i> | 6,192  | 5,577  | -1,110 |
| <i>alr4800</i> | 6,099  | 5,494  | -1,110 |
| <i>all4673</i> | 5,030  | 4,531  | -1,110 |
| <i>alr4216</i> | 5,014  | 4,517  | -1,110 |
| <i>alr0198</i> | 4,324  | 3,895  | -1,110 |
| <i>all2716</i> | 4,170  | 3,756  | -1,110 |

|                |        |        |        |
|----------------|--------|--------|--------|
| <i>alr0731</i> | 3,929  | 3,540  | -1,110 |
| <i>all1617</i> | 3,528  | 3,178  | -1,110 |
| <i>all1007</i> | 3,398  | 3,061  | -1,110 |
| <i>alr1271</i> | 3,309  | 2,981  | -1,110 |
| <i>alr1259</i> | 3,120  | 2,810  | -1,110 |
| <i>alr3285</i> | 2,654  | 2,390  | -1,110 |
| <i>obgE</i>    | 2,383  | 2,146  | -1,110 |
| <i>hupD</i>    | 2,128  | 1,917  | -1,110 |
| <i>alr3159</i> | 2,117  | 1,907  | -1,110 |
| <i>alr1998</i> | 1,792  | 1,615  | -1,110 |
| <i>all7631</i> | 1,569  | 1,413  | -1,110 |
| <i>all0453</i> | 1,421  | 1,280  | -1,110 |
| <i>all7133</i> | 1,156  | 1,041  | -1,110 |
| <i>trpE_2</i>  | 1,142  | 1,028  | -1,110 |
| <i>alr4346</i> | 1,005  | 0,906  | -1,110 |
| <i>alr2596</i> | 0,996  | 0,897  | -1,110 |
| <i>all3245</i> | 0,821  | 0,739  | -1,110 |
| <i>all5040</i> | 3,016  | 2,717  | -1,110 |
| <i>all0456</i> | 1,115  | 1,004  | -1,110 |
| <i>all4771</i> | 1,107  | 0,000  | -1,107 |
| <i>all7148</i> | 1,107  | 0,000  | -1,107 |
| <i>engA</i>    | 10,287 | 9,324  | -1,103 |
| <i>clpX</i>    | 19,111 | 17,333 | -1,103 |
| <i>rpsL</i>    | 30,102 | 27,321 | -1,102 |
| <i>orrA</i>    | 15,988 | 14,511 | -1,102 |
| <i>all0962</i> | 1,102  | 0,000  | -1,102 |
| <i>all7658</i> | 1,102  | 0,000  | -1,102 |
| <i>pepC</i>    | 6,708  | 6,093  | -1,101 |
| <i>ndhI</i>    | 15,568 | 14,158 | -1,100 |
| <i>all1303</i> | 6,445  | 5,862  | -1,100 |
| <i>groEL_2</i> | 15,211 | 13,847 | -1,099 |
| <i>all4118</i> | 12,325 | 11,248 | -1,096 |
| <i>asr3467</i> | 25,210 | 23,007 | -1,096 |
| <i>all1445</i> | 1,091  | 0,000  | -1,091 |
| <i>alr3312</i> | 1,091  | 0,000  | -1,091 |
| <i>alr3583</i> | 1,091  | 0,000  | -1,091 |
| <i>all3327</i> | 33,274 | 30,517 | -1,090 |
| <i>alr4839</i> | 8,868  | 8,154  | -1,087 |
| <i>alr2738</i> | 8,029  | 7,383  | -1,087 |
| <i>hrcA</i>    | 7,656  | 7,040  | -1,087 |
| <i>txlA</i>    | 7,260  | 6,676  | -1,087 |
| <i>all1225</i> | 4,434  | 4,077  | -1,087 |

|                |         |         |        |
|----------------|---------|---------|--------|
| <i>alr4943</i> | 4,145   | 3,812   | -1,087 |
| <i>dnaN</i>    | 3,611   | 3,321   | -1,087 |
| <i>alr3370</i> | 3,258   | 2,996   | -1,087 |
| <i>all1089</i> | 3,121   | 2,869   | -1,087 |
| <i>all3087</i> | 2,580   | 2,373   | -1,087 |
| <i>all4225</i> | 2,475   | 2,276   | -1,087 |
| <i>glyS</i>    | 1,954   | 1,797   | -1,087 |
| <i>all3193</i> | 8,052   | 7,405   | -1,087 |
| <i>all4690</i> | 1,086   | 0,000   | -1,086 |
| <i>carB</i>    | 8,136   | 7,496   | -1,085 |
| <i>uvsE</i>    | 1,084   | 0,000   | -1,084 |
| <i>all4254</i> | 8,486   | 7,842   | -1,082 |
| <i>all1273</i> | 1,081   | 0,000   | -1,081 |
| <i>all1816</i> | 1,081   | 0,000   | -1,081 |
| <i>alr2972</i> | 1,081   | 0,000   | -1,081 |
| <i>alr7097</i> | 1,081   | 0,000   | -1,081 |
| <i>alr7103</i> | 1,081   | 0,000   | -1,081 |
| <i>petH</i>    | 21,181  | 19,616  | -1,080 |
| <i>all1682</i> | 4,260   | 3,950   | -1,078 |
| <i>asr3935</i> | 27,039  | 25,187  | -1,074 |
| <i>gatB</i>    | 10,442  | 9,727   | -1,074 |
| <i>all3315</i> | 1,923   | 1,791   | -1,074 |
| <i>all4834</i> | 1,655   | 1,542   | -1,074 |
| <i>alr4293</i> | 15,663  | 14,590  | -1,074 |
| <i>alr2191</i> | 8,395   | 7,819   | -1,074 |
| <i>all1748</i> | 1,071   | 0,000   | -1,071 |
| <i>alr2215</i> | 1,071   | 0,000   | -1,071 |
| <i>alr2488</i> | 1,071   | 0,000   | -1,071 |
| <i>ureB</i>    | 1,071   | 0,000   | -1,071 |
| <i>alr4224</i> | 1,071   | 0,000   | -1,071 |
| <i>alr7292</i> | 1,071   | 0,000   | -1,071 |
| <i>all3933</i> | 4,249   | 3,969   | -1,071 |
| <i>all8083</i> | 129,032 | 120,751 | -1,069 |
| <i>alr3816</i> | 15,313  | 14,332  | -1,068 |
| <i>alr4104</i> | 61,423  | 57,546  | -1,067 |
| <i>alr1520</i> | 1,061   | 0,000   | -1,061 |
| <i>alr3063</i> | 1,058   | 0,000   | -1,058 |
| <i>glgA_2</i>  | 11,108  | 10,506  | -1,057 |
| <i>alr4094</i> | 5,696   | 5,387   | -1,057 |
| <i>all9031</i> | 4,597   | 4,348   | -1,057 |
| <i>all3051</i> | 4,261   | 4,030   | -1,057 |
| <i>all5011</i> | 3,637   | 3,440   | -1,057 |

|                |        |        |        |
|----------------|--------|--------|--------|
| <i>ruvC</i>    | 3,560  | 3,367  | -1,057 |
| <i>all0376</i> | 3,208  | 3,034  | -1,057 |
| <i>rfbC_2</i>  | 3,208  | 3,034  | -1,057 |
| <i>lysS</i>    | 3,116  | 2,948  | -1,057 |
| <i>all4350</i> | 2,684  | 2,539  | -1,057 |
| <i>alr3201</i> | 2,549  | 2,411  | -1,057 |
| <i>alr4521</i> | 2,298  | 2,174  | -1,057 |
| <i>alr2683</i> | 1,959  | 1,853  | -1,057 |
| <i>alr4099</i> | 1,959  | 1,853  | -1,057 |
| <i>all2302</i> | 1,493  | 1,412  | -1,057 |
| <i>alr3620</i> | 1,204  | 1,138  | -1,057 |
| <i>all1811</i> | 1,165  | 1,102  | -1,057 |
| <i>all0872</i> | 0,943  | 0,892  | -1,057 |
| <i>all2282</i> | 0,327  | 0,310  | -1,057 |
| <i>alr0549</i> | 34,854 | 32,965 | -1,057 |
| <i>alr0113</i> | 25,383 | 24,007 | -1,057 |
| <i>alr1224</i> | 12,100 | 11,444 | -1,057 |
| <i>alr0834</i> | 10,262 | 9,706  | -1,057 |
| <i>alr2887</i> | 9,429  | 8,918  | -1,057 |
| <i>all5013</i> | 7,889  | 7,462  | -1,057 |
| <i>ilvH</i>    | 6,380  | 6,035  | -1,057 |
| <i>alr3804</i> | 6,081  | 5,752  | -1,057 |
| <i>all3410</i> | 5,668  | 5,361  | -1,057 |
| <i>alr1352</i> | 5,508  | 5,209  | -1,057 |
| <i>all4929</i> | 5,300  | 5,013  | -1,057 |
| <i>all3124</i> | 5,213  | 4,930  | -1,057 |
| <i>alr4715</i> | 4,998  | 4,727  | -1,057 |
| <i>alr1669</i> | 4,927  | 4,660  | -1,057 |
| <i>alr1544</i> | 4,746  | 4,489  | -1,057 |
| <i>alr4326</i> | 4,746  | 4,489  | -1,057 |
| <i>all7630</i> | 4,357  | 4,121  | -1,057 |
| <i>all3186</i> | 4,324  | 4,090  | -1,057 |
| <i>all1741</i> | 4,045  | 3,826  | -1,057 |
| <i>all2623</i> | 3,978  | 3,763  | -1,057 |
| <i>hslO</i>    | 3,866  | 3,657  | -1,057 |
| <i>alr2312</i> | 3,626  | 3,430  | -1,057 |
| <i>alr1246</i> | 3,355  | 3,173  | -1,057 |
| <i>all4397</i> | 3,190  | 3,017  | -1,057 |
| <i>all1823</i> | 3,181  | 3,009  | -1,057 |
| <i>alr3445</i> | 3,139  | 2,969  | -1,057 |
| <i>exoD</i>    | 2,767  | 2,617  | -1,057 |
| <i>all3564</i> | 2,527  | 2,390  | -1,057 |

|                |        |        |        |
|----------------|--------|--------|--------|
| <i>alr3258</i> | 2,516  | 2,380  | -1,057 |
| <i>all1219</i> | 2,373  | 2,245  | -1,057 |
| <i>all5024</i> | 2,308  | 2,182  | -1,057 |
| <i>alr1968</i> | 2,304  | 2,180  | -1,057 |
| <i>all4089</i> | 2,254  | 2,132  | -1,057 |
| <i>alr2615</i> | 2,211  | 2,092  | -1,057 |
| <i>all0178</i> | 2,013  | 1,904  | -1,057 |
| <i>alr2785</i> | 1,796  | 1,699  | -1,057 |
| <i>alr0304</i> | 1,785  | 1,689  | -1,057 |
| <i>all4725</i> | 1,732  | 1,638  | -1,057 |
| <i>all7085</i> | 1,557  | 1,472  | -1,057 |
| <i>all0809</i> | 1,434  | 1,357  | -1,057 |
| <i>alr4168</i> | 1,377  | 1,302  | -1,057 |
| <i>alr4360</i> | 1,364  | 1,290  | -1,057 |
| <i>all7601</i> | 1,318  | 1,246  | -1,057 |
| <i>menE</i>    | 1,206  | 1,141  | -1,057 |
| <i>all0848</i> | 1,114  | 1,054  | -1,057 |
| <i>all1914</i> | 1,039  | 0,983  | -1,057 |
| <i>alr0290</i> | 0,889  | 0,840  | -1,057 |
| <i>alr7129</i> | 0,491  | 0,464  | -1,057 |
| <i>all3719</i> | 1,057  | 0,000  | -1,057 |
| <i>all8010</i> | 50,992 | 48,412 | -1,053 |
| <i>all9030</i> | 1,052  | 0,000  | -1,052 |
| <i>all5192</i> | 1,049  | 0,000  | -1,049 |
| <i>nodM</i>    | 7,109  | 6,792  | -1,047 |
| <i>alr0652</i> | 9,158  | 8,765  | -1,045 |
| <i>all7268</i> | 6,565  | 6,283  | -1,045 |
| <i>all9003</i> | 2,978  | 2,850  | -1,045 |
| <i>all4312</i> | 12,721 | 12,175 | -1,045 |
| <i>alr0237</i> | 12,103 | 11,597 | -1,044 |
| <i>tig</i>     | 11,379 | 10,919 | -1,042 |
| <i>all0185</i> | 4,839  | 4,643  | -1,042 |
| <i>alr2428</i> | 3,299  | 3,166  | -1,042 |
| <i>all2229</i> | 1,039  | 0,000  | -1,039 |
| <i>cpcG4</i>   | 35,396 | 34,058 | -1,039 |
| <i>all4377</i> | 50,340 | 48,494 | -1,038 |
| <i>asl2353</i> | 21,229 | 20,451 | -1,038 |
| <i>alr2201</i> | 12,219 | 11,771 | -1,038 |
| <i>alr4616</i> | 12,010 | 11,569 | -1,038 |
| <i>alr2758</i> | 5,151  | 4,962  | -1,038 |
| <i>all4127</i> | 3,720  | 3,583  | -1,038 |
| <i>dnaB_1</i>  | 2,388  | 2,301  | -1,038 |



|                |        |        |        |
|----------------|--------|--------|--------|
| <i>alr0710</i> | 1,168  | 1,125  | -1,038 |
| <i>all2402</i> | 1,033  | 0,000  | -1,033 |
| <i>alr3247</i> | 1,033  | 0,000  | -1,033 |
| <i>all0028</i> | 22,998 | 22,310 | -1,031 |
| <i>all5273</i> | 10,468 | 10,155 | -1,031 |
| <i>alr4354</i> | 6,837  | 6,633  | -1,031 |
| <i>all1019</i> | 5,500  | 5,335  | -1,031 |
| <i>alr0474</i> | 2,543  | 2,466  | -1,031 |
| <i>all3173</i> | 52,705 | 51,127 | -1,031 |
| <i>asr2016</i> | 15,489 | 15,025 | -1,031 |
| <i>all4780</i> | 7,368  | 7,148  | -1,031 |
| <i>all2008</i> | 3,640  | 3,531  | -1,031 |
| <i>alr2986</i> | 3,426  | 3,324  | -1,031 |
| <i>ruvB</i>    | 6,681  | 6,520  | -1,025 |
| <i>all4656</i> | 5,880  | 5,738  | -1,025 |
| <i>alr0548</i> | 5,729  | 5,591  | -1,025 |
| <i>all0441</i> | 2,933  | 2,862  | -1,025 |
| <i>alr3900</i> | 6,130  | 5,982  | -1,025 |
| <i>all1919</i> | 4,483  | 4,374  | -1,025 |
| <i>all2022</i> | 1,024  | 0,000  | -1,024 |
| <i>chlN</i>    | 16,466 | 16,125 | -1,021 |
| <i>all2528</i> | 1,020  | 0,000  | -1,020 |
| <i>alr4670</i> | 15,874 | 15,570 | -1,020 |
| <i>all3259</i> | 38,548 | 37,868 | -1,018 |
| <i>alr1562</i> | 1,015  | 0,000  | -1,015 |
| <i>all5025</i> | 1,015  | 0,000  | -1,015 |
| <i>alr5134</i> | 6,720  | 6,621  | -1,015 |
| <i>alr2449</i> | 2,518  | 2,481  | -1,015 |
| <i>all3271</i> | 2,504  | 2,467  | -1,015 |
| <i>alr3277</i> | 15,568 | 15,338 | -1,015 |
| <i>asr0062</i> | 13,538 | 13,337 | -1,015 |
| <i>all1163</i> | 12,053 | 11,875 | -1,015 |
| <i>accA</i>    | 11,426 | 11,257 | -1,015 |
| <i>all7183</i> | 8,052  | 7,934  | -1,015 |
| <i>Int</i>     | 5,297  | 5,219  | -1,015 |
| <i>all3821</i> | 4,365  | 4,300  | -1,015 |
| <i>all3435</i> | 4,115  | 4,054  | -1,015 |
| <i>all4675</i> | 3,992  | 3,933  | -1,015 |
| <i>all3551</i> | 2,616  | 2,578  | -1,015 |
| <i>alr0289</i> | 2,359  | 2,324  | -1,015 |
| <i>alr3654</i> | 2,026  | 1,996  | -1,015 |
| <i>alr3466</i> | 1,835  | 1,808  | -1,015 |

|                |         |         |        |
|----------------|---------|---------|--------|
| <i>all0993</i> | 0,873   | 0,860   | -1,015 |
| <i>alr7190</i> | 0,784   | 0,772   | -1,015 |
| <i>glpX</i>    | 46,232  | 45,748  | -1,011 |
| <i>hemA</i>    | 14,697  | 14,587  | -1,008 |
| <i>all3418</i> | 6,408   | 6,360   | -1,008 |
| <i>alr7566</i> | 1,007   | 0,000   | -1,007 |
| <i>all7584</i> | 1,007   | 0,000   | -1,007 |
| <i>alr3330</i> | 134,509 | 133,994 | -1,004 |
| <i>rbpF</i>    | 33,046  | 32,991  | -1,002 |
| <i>alr2771</i> | 8,488   | 8,485   | -1,000 |
| <i>alr7007</i> | 0,998   | 0,000   | -0,998 |
| <i>alr8017</i> | 0,998   | 0,000   | -0,998 |
| <i>alr8566</i> | 0,998   | 0,000   | -0,998 |
| <i>all1172</i> | 0,977   | 0,000   | -0,977 |
| <i>all1006</i> | 0,973   | 0,000   | -0,973 |
| <i>alr3061</i> | 0,973   | 0,000   | -0,973 |
| <i>alr7254</i> | 0,973   | 0,000   | -0,973 |
| <i>all1071</i> | 0,965   | 0,000   | -0,965 |
| <i>all1463</i> | 0,965   | 0,000   | -0,965 |
| <i>alr2119</i> | 0,957   | 0,000   | -0,957 |
| <i>all4719</i> | 0,957   | 0,000   | -0,957 |
| <i>alr1577</i> | 0,954   | 0,000   | -0,954 |
| <i>all0220</i> | 0,953   | 0,000   | -0,953 |
| <i>alr2142</i> | 0,953   | 0,000   | -0,953 |
| <i>alr1718</i> | 0,949   | 0,000   | -0,949 |
| <i>alr3004</i> | 0,949   | 0,000   | -0,949 |
| <i>all4556</i> | 0,944   | 0,000   | -0,944 |
| <i>hesB</i>    | 0,942   | 0,000   | -0,942 |
| <i>all2721</i> | 0,942   | 0,000   | -0,942 |
| <i>alr5290</i> | 0,942   | 0,000   | -0,942 |
| <i>alr2484</i> | 0,938   | 0,000   | -0,938 |
| <i>all7053</i> | 0,934   | 0,000   | -0,934 |
| <i>alr7107</i> | 0,934   | 0,000   | -0,934 |
| <i>all0823</i> | 0,927   | 0,000   | -0,927 |
| <i>gvpG</i>    | 0,927   | 0,000   | -0,927 |
| <i>all2789</i> | 0,927   | 0,000   | -0,927 |
| <i>all3439</i> | 0,927   | 0,000   | -0,927 |
| <i>all3000</i> | 0,924   | 0,000   | -0,924 |
| <i>all3306</i> | 0,923   | 0,000   | -0,923 |
| <i>all0211</i> | 0,919   | 0,000   | -0,919 |
| <i>all3040</i> | 0,919   | 0,000   | -0,919 |
| <i>alr4455</i> | 0,919   | 0,000   | -0,919 |

|                |       |       |        |
|----------------|-------|-------|--------|
| <i>all3206</i> | 0,918 | 0,000 | -0,918 |
| <i>all0407</i> | 0,912 | 0,000 | -0,912 |
| <i>alr1029</i> | 0,912 | 0,000 | -0,912 |
| <i>all7002</i> | 0,912 | 0,000 | -0,912 |
| <i>alr7534</i> | 0,912 | 0,000 | -0,912 |
| <i>alr0080</i> | 0,905 | 0,000 | -0,905 |
| <i>alr4305</i> | 0,903 | 0,000 | -0,903 |
| <i>all1087</i> | 0,898 | 0,000 | -0,898 |
| <i>all2612</i> | 0,898 | 0,000 | -0,898 |
| <i>all7186</i> | 0,898 | 0,000 | -0,898 |
| <i>all0908</i> | 0,895 | 0,000 | -0,895 |
| <i>all7033</i> | 0,895 | 0,000 | -0,895 |
| <i>all7578</i> | 0,894 | 0,000 | -0,894 |
| <i>alr0554</i> | 0,891 | 0,000 | -0,891 |
| <i>all0907</i> | 0,891 | 0,000 | -0,891 |
| <i>all7370</i> | 0,891 | 0,000 | -0,891 |
| <i>alr4564</i> | 0,889 | 0,000 | -0,889 |
| <i>alr2143</i> | 0,885 | 0,000 | -0,885 |
| <i>alr3803</i> | 0,885 | 0,000 | -0,885 |
| <i>all0468</i> | 0,878 | 0,000 | -0,878 |
| <i>phnC</i>    | 0,878 | 0,000 | -0,878 |
| <i>alr2863</i> | 0,871 | 0,000 | -0,871 |
| <i>all3972</i> | 0,871 | 0,000 | -0,871 |
| <i>alr4922</i> | 0,871 | 0,000 | -0,871 |
| <i>all7624</i> | 0,871 | 0,000 | -0,871 |
| <i>all1996</i> | 0,859 | 0,000 | -0,859 |
| <i>alr7528</i> | 0,855 | 0,000 | -0,855 |
| <i>nifX</i>    | 0,846 | 0,000 | -0,846 |
| <i>all3629</i> | 0,843 | 0,000 | -0,843 |
| <i>alr2966</i> | 0,837 | 0,000 | -0,837 |
| <i>alr7580</i> | 0,834 | 0,000 | -0,834 |
| <i>alr4222</i> | 0,828 | 0,000 | -0,828 |
| <i>all3153</i> | 0,823 | 0,000 | -0,823 |
| <i>all1504</i> | 0,822 | 0,000 | -0,822 |
| <i>all8553</i> | 0,822 | 0,000 | -0,822 |
| <i>alr5182</i> | 0,817 | 0,000 | -0,817 |
| <i>all1388</i> | 0,811 | 0,000 | -0,811 |
| <i>all3542</i> | 0,811 | 0,000 | -0,811 |
| <i>alr1501</i> | 0,805 | 0,000 | -0,805 |
| <i>alr2594</i> | 0,805 | 0,000 | -0,805 |
| <i>alr1040</i> | 0,800 | 0,000 | -0,800 |
| <i>all5171</i> | 0,800 | 0,000 | -0,800 |

|                |       |       |        |
|----------------|-------|-------|--------|
| <i>alr2802</i> | 0,794 | 0,000 | -0,794 |
| <i>alr3336</i> | 0,792 | 0,000 | -0,792 |
| <i>alr4880</i> | 0,789 | 0,000 | -0,789 |
| <i>all5132</i> | 0,789 | 0,000 | -0,789 |
| <i>alr4323</i> | 0,781 | 0,000 | -0,781 |
| <i>alr7043</i> | 0,778 | 0,000 | -0,778 |
| <i>all1464</i> | 0,773 | 0,000 | -0,773 |
| <i>all4475</i> | 0,770 | 0,000 | -0,770 |
| <i>alr0377</i> | 0,758 | 0,000 | -0,758 |
| <i>alr0614</i> | 0,758 | 0,000 | -0,758 |
| <i>all4467</i> | 0,758 | 0,000 | -0,758 |
| <i>all8507</i> | 0,753 | 0,000 | -0,753 |
| <i>all0707</i> | 0,750 | 0,000 | -0,750 |
| <i>ilvB_1</i>  | 0,741 | 0,000 | -0,741 |
| <i>alr2840</i> | 0,739 | 0,000 | -0,739 |
| <i>all3347</i> | 0,739 | 0,000 | -0,739 |
| <i>all4927</i> | 0,739 | 0,000 | -0,739 |
| <i>all7166</i> | 0,739 | 0,000 | -0,739 |
| <i>all7588</i> | 0,739 | 0,000 | -0,739 |
| <i>nifB</i>    | 0,736 | 0,000 | -0,736 |
| <i>alr3070</i> | 0,732 | 0,000 | -0,732 |
| <i>all4923</i> | 0,730 | 0,000 | -0,730 |
| <i>alr3475</i> | 0,728 | 0,000 | -0,728 |
| <i>alr2212</i> | 0,714 | 0,000 | -0,714 |
| <i>all4233</i> | 0,713 | 0,000 | -0,713 |
| <i>all2289</i> | 0,708 | 0,000 | -0,708 |
| <i>alr4250</i> | 0,708 | 0,000 | -0,708 |
| <i>all7368</i> | 0,708 | 0,000 | -0,708 |
| <i>all8551</i> | 0,708 | 0,000 | -0,708 |
| <i>alr3755</i> | 0,706 | 0,000 | -0,706 |
| <i>alr2210</i> | 0,706 | 0,000 | -0,706 |
| <i>all1100</i> | 0,703 | 0,000 | -0,703 |
| <i>alr2174</i> | 0,703 | 0,000 | -0,703 |
| <i>alr2178</i> | 0,701 | 0,000 | -0,701 |
| <i>alr1568</i> | 0,699 | 0,000 | -0,699 |
| <i>all4710</i> | 0,699 | 0,000 | -0,699 |
| <i>alr7138</i> | 0,699 | 0,000 | -0,699 |
| <i>all8547</i> | 0,699 | 0,000 | -0,699 |
| <i>alr3078</i> | 0,697 | 0,000 | -0,697 |
| <i>all1193</i> | 0,695 | 0,000 | -0,695 |
| <i>alr2184</i> | 0,695 | 0,000 | -0,695 |
| <i>all4389</i> | 0,695 | 0,000 | -0,695 |

|                |       |       |        |
|----------------|-------|-------|--------|
| <i>gap3</i>    | 0,691 | 0,000 | -0,691 |
| <i>all0833</i> | 0,687 | 0,000 | -0,687 |
| <i>all2149</i> | 0,687 | 0,000 | -0,687 |
| <i>all2586</i> | 0,679 | 0,000 | -0,679 |
| <i>all7113</i> | 0,679 | 0,000 | -0,679 |
| <i>all2670</i> | 0,678 | 0,000 | -0,678 |
| <i>all0634</i> | 0,671 | 0,000 | -0,671 |
| <i>alr2625</i> | 0,671 | 0,000 | -0,671 |
| <i>all7054</i> | 0,667 | 0,000 | -0,667 |
| <i>alr3242</i> | 0,665 | 0,000 | -0,665 |
| <i>all1189</i> | 0,663 | 0,000 | -0,663 |
| <i>all1472</i> | 0,663 | 0,000 | -0,663 |
| <i>alr4230</i> | 0,660 | 0,000 | -0,660 |
| <i>alr7042</i> | 0,660 | 0,000 | -0,660 |
| <i>ccmA_1</i>  | 0,658 | 0,000 | -0,658 |
| <i>alr1166</i> | 0,649 | 0,000 | -0,649 |
| <i>alr1631</i> | 0,649 | 0,000 | -0,649 |
| <i>all2007</i> | 0,649 | 0,000 | -0,649 |
| <i>all0059</i> | 0,642 | 0,000 | -0,642 |
| <i>hoxY</i>    | 0,642 | 0,000 | -0,642 |
| <i>alr7184</i> | 0,642 | 0,000 | -0,642 |
| <i>all0615</i> | 0,635 | 0,000 | -0,635 |
| <i>all4697</i> | 0,635 | 0,000 | -0,635 |
| <i>all5130</i> | 0,635 | 0,000 | -0,635 |
| <i>all7679</i> | 0,635 | 0,000 | -0,635 |
| <i>alr1580</i> | 0,628 | 0,000 | -0,628 |
| <i>alr2140</i> | 0,628 | 0,000 | -0,628 |
| <i>all0708</i> | 0,624 | 0,000 | -0,624 |
| <i>alr0943</i> | 0,624 | 0,000 | -0,624 |
| <i>alr5160</i> | 0,624 | 0,000 | -0,624 |
| <i>alr8509</i> | 0,617 | 0,000 | -0,617 |
| <i>all1020</i> | 0,615 | 0,000 | -0,615 |
| <i>alr2278</i> | 0,615 | 0,000 | -0,615 |
| <i>alr2839</i> | 0,611 | 0,000 | -0,611 |
| <i>all4644</i> | 0,611 | 0,000 | -0,611 |
| <i>alr4854</i> | 0,608 | 0,000 | -0,608 |
| <i>alr5243</i> | 0,605 | 0,000 | -0,605 |
| <i>all7084</i> | 0,605 | 0,000 | -0,605 |
| <i>all0393</i> | 0,602 | 0,000 | -0,602 |
| <i>all1573</i> | 0,599 | 0,000 | -0,599 |
| <i>alr7684</i> | 0,596 | 0,000 | -0,596 |
| <i>alr1567</i> | 0,593 | 0,000 | -0,593 |

|                |       |       |        |
|----------------|-------|-------|--------|
| <i>alr4229</i> | 0,593 | 0,000 | -0,593 |
| <i>aroB_1</i>  | 0,591 | 0,000 | -0,591 |
| <i>all2618</i> | 0,590 | 0,000 | -0,590 |
| <i>alr7530</i> | 0,587 | 0,000 | -0,587 |
| <i>all0422</i> | 0,584 | 0,000 | -0,584 |
| <i>alr3646</i> | 0,581 | 0,000 | -0,581 |
| <i>all7022</i> | 0,581 | 0,000 | -0,581 |
| <i>alr2867</i> | 0,575 | 0,000 | -0,575 |
| <i>all2442</i> | 0,572 | 0,000 | -0,572 |
| <i>all4843</i> | 0,570 | 0,000 | -0,570 |
| <i>alr5151</i> | 0,565 | 0,000 | -0,565 |
| <i>all7653</i> | 0,564 | 0,000 | -0,564 |
| <i>alr3492</i> | 0,563 | 0,000 | -0,563 |
| <i>all3750</i> | 0,561 | 0,000 | -0,561 |
| <i>all7225</i> | 0,561 | 0,000 | -0,561 |
| <i>all0372</i> | 0,559 | 0,000 | -0,559 |
| <i>all1888</i> | 0,557 | 0,000 | -0,557 |
| <i>alr2138</i> | 0,556 | 0,000 | -0,556 |
| <i>alr5370</i> | 0,556 | 0,000 | -0,556 |
| <i>alr5329</i> | 0,551 | 0,000 | -0,551 |
| <i>all1990</i> | 0,546 | 0,000 | -0,546 |
| <i>all3257</i> | 0,546 | 0,000 | -0,546 |
| <i>alr5201</i> | 0,542 | 0,000 | -0,542 |
| <i>alr1332</i> | 0,538 | 0,000 | -0,538 |
| <i>folE_1</i>  | 0,538 | 0,000 | -0,538 |
| <i>all4593</i> | 0,537 | 0,000 | -0,537 |
| <i>all8540</i> | 0,536 | 0,000 | -0,536 |
| <i>all0342</i> | 0,533 | 0,000 | -0,533 |
| <i>all4635</i> | 0,531 | 0,000 | -0,531 |
| <i>all7267</i> | 0,530 | 0,000 | -0,530 |
| <i>all4437</i> | 0,528 | 0,000 | -0,528 |
| <i>all2633</i> | 0,521 | 0,000 | -0,521 |
| <i>alr4769</i> | 0,512 | 0,000 | -0,512 |
| <i>alr0280</i> | 0,510 | 0,000 | -0,510 |
| <i>all2034</i> | 0,509 | 0,000 | -0,509 |
| <i>alr7383</i> | 0,501 | 0,000 | -0,501 |
| <i>alr1507</i> | 0,499 | 0,000 | -0,499 |
| <i>all3349</i> | 0,497 | 0,000 | -0,497 |
| <i>alr5211</i> | 0,496 | 0,000 | -0,496 |
| <i>aspA</i>    | 0,495 | 0,000 | -0,495 |
| <i>alr1200</i> | 0,493 | 0,000 | -0,493 |
| <i>all4729</i> | 0,493 | 0,000 | -0,493 |

|                |       |       |        |
|----------------|-------|-------|--------|
| <i>alr3125</i> | 0,491 | 0,000 | -0,491 |
| <i>recQ</i>    | 0,485 | 0,000 | -0,485 |
| <i>alr3769</i> | 0,484 | 0,000 | -0,484 |
| <i>alr7522</i> | 0,484 | 0,000 | -0,484 |
| <i>alr7559</i> | 0,484 | 0,000 | -0,484 |
| <i>alr1167</i> | 0,480 | 0,000 | -0,480 |
| <i>all1608</i> | 0,480 | 0,000 | -0,480 |
| <i>all1415</i> | 0,479 | 0,000 | -0,479 |
| <i>alr2857</i> | 0,479 | 0,000 | -0,479 |
| <i>devA</i>    | 0,477 | 0,000 | -0,477 |
| <i>alr2226</i> | 0,473 | 0,000 | -0,473 |
| <i>all2676</i> | 0,472 | 0,000 | -0,472 |
| <i>alr2775</i> | 0,467 | 0,000 | -0,467 |
| <i>all7668</i> | 0,465 | 0,000 | -0,465 |
| <i>alr1505</i> | 0,462 | 0,000 | -0,462 |
| <i>alr2064</i> | 0,461 | 0,000 | -0,461 |
| <i>all7525</i> | 0,460 | 0,000 | -0,460 |
| <i>all7016</i> | 0,456 | 0,000 | -0,456 |
| <i>alr7581</i> | 0,454 | 0,000 | -0,454 |
| <i>alr7650</i> | 0,454 | 0,000 | -0,454 |
| <i>alr1918</i> | 0,453 | 0,000 | -0,453 |
| <i>nagB</i>    | 0,451 | 0,000 | -0,451 |
| <i>alr7535</i> | 0,451 | 0,000 | -0,451 |
| <i>alr4247</i> | 0,450 | 0,000 | -0,450 |
| <i>alr0191</i> | 0,444 | 0,000 | -0,444 |
| <i>all7353</i> | 0,444 | 0,000 | -0,444 |
| <i>alr3216</i> | 0,442 | 0,000 | -0,442 |
| <i>alr2628</i> | 0,441 | 0,000 | -0,441 |
| <i>alr7209</i> | 0,441 | 0,000 | -0,441 |
| <i>alr4619</i> | 0,437 | 0,000 | -0,437 |
| <i>alr5296</i> | 0,437 | 0,000 | -0,437 |
| <i>alr0228</i> | 0,436 | 0,000 | -0,436 |
| <i>alr5318</i> | 0,434 | 0,000 | -0,434 |
| <i>alr1198</i> | 0,431 | 0,000 | -0,431 |
| <i>alr1306</i> | 0,431 | 0,000 | -0,431 |
| <i>all7671</i> | 0,425 | 0,000 | -0,425 |
| <i>all7288</i> | 0,420 | 0,000 | -0,420 |
| <i>alr2866</i> | 0,417 | 0,000 | -0,417 |
| <i>alr7544</i> | 0,416 | 0,000 | -0,416 |
| <i>all2658</i> | 0,414 | 0,000 | -0,414 |
| <i>all2845</i> | 0,414 | 0,000 | -0,414 |
| <i>dapF_2</i>  | 0,408 | 0,000 | -0,408 |

|                |       |       |        |
|----------------|-------|-------|--------|
| <i>alr1634</i> | 0,405 | 0,000 | -0,405 |
| <i>alr2154</i> | 0,405 | 0,000 | -0,405 |
| <i>all2584</i> | 0,403 | 0,000 | -0,403 |
| <i>all0341</i> | 0,401 | 0,000 | -0,401 |
| <i>all2619</i> | 0,401 | 0,000 | -0,401 |
| <i>all3488</i> | 0,400 | 0,000 | -0,400 |
| <i>all2963</i> | 0,397 | 0,000 | -0,397 |
| <i>alr0789</i> | 0,396 | 0,000 | -0,396 |
| <i>alr7213</i> | 0,396 | 0,000 | -0,396 |
| <i>alr7541</i> | 0,393 | 0,000 | -0,393 |
| <i>alr4278</i> | 0,389 | 0,000 | 0,389  |
| <i>alr7132</i> | 0,382 | 0,000 | -0,382 |
| <i>alr0722</i> | 0,380 | 0,000 | -0,380 |
| <i>all1475</i> | 0,378 | 0,000 | -0,378 |
| <i>all3772</i> | 0,374 | 0,000 | -0,374 |
| <i>alr3393</i> | 0,371 | 0,000 | -0,371 |
| <i>alr7157</i> | 0,371 | 0,000 | -0,371 |
| <i>alr4447</i> | 0,369 | 0,000 | -0,369 |
| <i>alr4655</i> | 0,364 | 0,000 | -0,364 |
| <i>all5310</i> | 0,355 | 0,000 | -0,355 |
| <i>alr3627</i> | 0,354 | 0,000 | -0,354 |
| <i>alr2590</i> | 0,353 | 0,000 | -0,353 |
| <i>alr2595</i> | 0,353 | 0,000 | -0,353 |
| <i>alr2627</i> | 0,352 | 0,000 | -0,352 |
| <i>alr2593</i> | 0,350 | 0,000 | -0,350 |
| <i>all7291</i> | 0,349 | 0,000 | -0,349 |
| <i>alr0558</i> | 0,345 | 0,000 | -0,345 |
| <i>all0914</i> | 0,345 | 0,000 | -0,345 |
| <i>alr2187</i> | 0,345 | 0,000 | -0,345 |
| <i>alr2828</i> | 0,345 | 0,000 | -0,345 |
| <i>alr2575</i> | 0,343 | 0,000 | -0,343 |
| <i>alr2294</i> | 0,340 | 0,000 | -0,340 |
| <i>alr4882</i> | 0,340 | 0,000 | -0,340 |
| <i>alr3155</i> | 0,338 | 0,000 | -0,338 |
| <i>alr5203</i> | 0,336 | 0,000 | -0,336 |
| <i>alr1901</i> | 0,335 | 0,000 | -0,335 |
| <i>all0426</i> | 0,330 | 0,000 | -0,330 |
| <i>alr4032</i> | 0,322 | 0,000 | -0,322 |
| <i>alr7089</i> | 0,320 | 0,000 | -0,320 |
| <i>alr1680</i> | 0,313 | 0,000 | -0,313 |
| <i>pilT_1</i>  | 0,313 | 0,000 | -0,313 |
| <i>alr8522</i> | 0,311 | 0,000 | -0,311 |



|                |       |       |        |
|----------------|-------|-------|--------|
| <i>phnM_1</i>  | 0,308 | 0,000 | -0,308 |
| <i>alr4881</i> | 0,305 | 0,000 | -0,305 |
| <i>devC</i>    | 0,302 | 0,000 | -0,302 |
| <i>all2642</i> | 0,301 | 0,000 | -0,301 |
| <i>alr0895</i> | 0,299 | 0,000 | -0,299 |
| <i>alr0897</i> | 0,299 | 0,000 | -0,299 |
| <i>all4349</i> | 0,292 | 0,000 | -0,292 |
| <i>nifS_1</i>  | 0,291 | 0,000 | -0,291 |
| <i>all7195</i> | 0,291 | 0,000 | -0,291 |
| <i>alr2678</i> | 0,290 | 0,000 | -0,290 |
| <i>all7663</i> | 0,290 | 0,000 | -0,290 |
| <i>all3975</i> | 0,289 | 0,000 | -0,289 |
| <i>all2171</i> | 0,287 | 0,000 | -0,287 |
| <i>all2656</i> | 0,281 | 0,000 | -0,281 |
| <i>alr2256</i> | 0,281 | 0,000 | -0,281 |
| <i>alr3072</i> | 0,275 | 0,000 | -0,275 |
| <i>all2687</i> | 0,273 | 0,000 | -0,273 |
| <i>all0919</i> | 0,272 | 0,000 | -0,272 |
| <i>pilT_2</i>  | 0,270 | 0,000 | -0,270 |
| <i>all0416</i> | 0,269 | 0,000 | -0,269 |
| <i>alr2626</i> | 0,267 | 0,000 | -0,267 |
| <i>hstK</i>    | 0,263 | 0,000 | -0,263 |
| <i>all1168</i> | 0,259 | 0,000 | -0,259 |
| <i>dnaB_2</i>  | 0,257 | 0,000 | -0,257 |
| <i>all2796</i> | 0,248 | 0,000 | -0,248 |
| <i>alr5075</i> | 0,243 | 0,000 | -0,243 |
| <i>all0396</i> | 0,236 | 0,000 | -0,236 |
| <i>alr0744</i> | 0,236 | 0,000 | -0,236 |
| <i>all0726</i> | 0,222 | 0,000 | -0,222 |
| <i>all2649</i> | 0,221 | 0,000 | -0,221 |
| <i>alr1527</i> | 0,203 | 0,000 | -0,203 |
| <i>alr2663</i> | 0,201 | 0,000 | -0,201 |
| <i>all1644</i> | 0,199 | 0,000 | -0,199 |
| <i>all5116</i> | 0,198 | 0,000 | -0,198 |
| <i>all2146</i> | 0,195 | 0,000 | -0,195 |
| <i>all0394</i> | 0,192 | 0,000 | -0,192 |
| <i>alr7539</i> | 0,192 | 0,000 | -0,192 |
| <i>all2843</i> | 0,186 | 0,000 | -0,186 |
| <i>alr2476</i> | 0,183 | 0,000 | -0,183 |
| <i>alr1468</i> | 0,175 | 0,000 | -0,175 |
| <i>alr3471</i> | 0,162 | 0,000 | -0,162 |
| <i>hglE_2</i>  | 0,151 | 0,000 | -0,151 |

|                |       |       |        |
|----------------|-------|-------|--------|
| <i>all2648</i> | 0,135 | 0,000 | -0,135 |
| <i>all5111</i> | 0,121 | 0,000 | -0,121 |
| <i>all1643</i> | 0,073 | 0,000 | -0,073 |
| <i>all7501</i> | 0,000 | 0,003 | 0,003  |
| <i>all2643</i> | 0,000 | 0,167 | 0,167  |
| <i>all2674</i> | 0,000 | 0,212 | 0,212  |
| <i>all2243</i> | 0,000 | 0,300 | 0,300  |
| <i>alr7064</i> | 0,000 | 0,303 | 0,303  |
| <i>all7136</i> | 0,000 | 0,338 | 0,338  |
| <i>alr7046</i> | 0,000 | 0,340 | 0,340  |
| <i>all4002</i> | 0,000 | 0,386 | 0,386  |
| <i>all0324</i> | 0,000 | 0,411 | 0,411  |
| <i>alr2711</i> | 0,000 | 0,431 | 0,431  |
| <i>alr1180</i> | 0,000 | 0,435 | 0,435  |
| <i>alr3065</i> | 0,000 | 0,436 | 0,436  |
| <i>all4126</i> | 0,000 | 0,444 | 0,444  |
| <i>alr2257</i> | 0,000 | 0,458 | 0,458  |
| <i>all2032</i> | 0,000 | 0,471 | 0,471  |
| <i>alr4974</i> | 0,000 | 0,477 | 0,477  |
| <i>all0721</i> | 0,000 | 0,493 | 0,493  |
| <i>all2653</i> | 0,000 | 0,516 | 0,516  |
| <i>all2021</i> | 0,000 | 0,516 | 0,516  |
| <i>alr1912</i> | 0,000 | 0,535 | 0,535  |
| <i>all0360</i> | 0,000 | 0,537 | 0,537  |
| <i>all0932</i> | 0,000 | 0,537 | 0,537  |
| <i>all2159</i> | 0,000 | 0,540 | 0,540  |
| <i>alr7574</i> | 0,000 | 0,575 | 0,575  |
| <i>alr8007</i> | 0,000 | 0,584 | 0,584  |
| <i>alr7567</i> | 0,000 | 0,586 | 0,586  |
| <i>thrS_2</i>  | 0,000 | 0,601 | 0,601  |
| <i>alr8532</i> | 0,000 | 0,603 | 0,603  |
| <i>alr1276</i> | 0,000 | 0,667 | 0,667  |
| <i>alr1528</i> | 0,000 | 0,669 | 0,669  |
| <i>alr5200</i> | 0,000 | 0,679 | 0,679  |
| <i>all7123</i> | 0,000 | 0,687 | 0,687  |
| <i>all7135</i> | 0,000 | 0,689 | 0,689  |
| <i>alr3885</i> | 0,000 | 0,700 | 0,700  |
| <i>phnK</i>    | 0,000 | 0,713 | 0,713  |
| <i>alr2834</i> | 0,000 | 0,719 | 0,719  |
| <i>all1478</i> | 0,000 | 0,727 | 0,727  |
| <i>alr1563</i> | 0,000 | 0,727 | 0,727  |
| <i>all2578</i> | 0,000 | 0,736 | 0,736  |

|                |        |        |       |
|----------------|--------|--------|-------|
| <i>alr7549</i> | 0,000  | 0,745  | 0,745 |
| <i>all1574</i> | 0,000  | 0,748  | 0,748 |
| <i>alr7533</i> | 0,000  | 0,754  | 0,754 |
| <i>purN</i>    | 0,000  | 0,764  | 0,764 |
| <i>all1179</i> | 0,000  | 0,767  | 0,767 |
| <i>all7270</i> | 0,000  | 0,770  | 0,770 |
| <i>alr9010</i> | 0,000  | 0,770  | 0,770 |
| <i>alr0720</i> | 0,000  | 0,777  | 0,777 |
| <i>all2868</i> | 0,000  | 0,793  | 0,793 |
| <i>alr3774</i> | 0,000  | 0,793  | 0,793 |
| <i>alr7029</i> | 0,000  | 0,797  | 0,797 |
| <i>all5245</i> | 0,000  | 0,822  | 0,822 |
| <i>alr1579</i> | 0,000  | 0,825  | 0,825 |
| <i>all7590</i> | 0,000  | 0,844  | 0,844 |
| <i>alr1698</i> | 0,000  | 0,876  | 0,876 |
| <i>phnI</i>    | 0,000  | 0,885  | 0,885 |
| <i>alr0765</i> | 0,000  | 0,898  | 0,898 |
| <i>all4474</i> | 0,000  | 0,898  | 0,898 |
| <i>all1711</i> | 0,000  | 0,920  | 0,920 |
| <i>all4243</i> | 0,000  | 0,920  | 0,920 |
| <i>alr0668</i> | 0,000  | 0,925  | 0,925 |
| <i>all2792</i> | 0,000  | 0,925  | 0,925 |
| <i>alr7003</i> | 0,000  | 0,925  | 0,925 |
| <i>all2652</i> | 0,000  | 0,927  | 0,927 |
| <i>alr3507</i> | 0,000  | 0,944  | 0,944 |
| <i>hepB</i>    | 0,000  | 0,944  | 0,944 |
| <i>all3728</i> | 0,000  | 0,954  | 0,954 |
| <i>all7645</i> | 0,000  | 0,954  | 0,954 |
| <i>all8068</i> | 0,000  | 0,959  | 0,959 |
| <i>alr3121</i> | 0,000  | 0,961  | 0,961 |
| <i>all7523</i> | 0,000  | 0,964  | 0,964 |
| <i>alr5228</i> | 0,000  | 0,969  | 0,969 |
| <i>all7675</i> | 0,000  | 0,974  | 0,974 |
| <i>alr1444</i> | 0,000  | 0,984  | 0,984 |
| <i>alr7095</i> | 0,000  | 0,984  | 0,984 |
| <i>petB</i>    | 40,001 | 40,050 | 1,001 |
| <i>all0565</i> | 8,737  | 8,765  | 1,003 |
| <i>alr7219</i> | 5,865  | 5,883  | 1,003 |
| <i>alr3562</i> | 2,710  | 2,718  | 1,003 |
| <i>alr7215</i> | 1,046  | 1,049  | 1,003 |
| <i>all0604</i> | 10,703 | 10,737 | 1,003 |
| <i>all1162</i> | 9,375  | 9,404  | 1,003 |

|                |            |            |       |
|----------------|------------|------------|-------|
| <i>all0164</i> | 9,307      | 9,336      | 1,003 |
| <i>alr3099</i> | 9,285      | 9,314      | 1,003 |
| <i>alr1074</i> | 5,838      | 5,856      | 1,003 |
| <i>glcD</i>    | 2,980      | 2,989      | 1,003 |
| <i>rffM</i>    | 5,117      | 5,133      | 1,003 |
| <i>comE</i>    | 1,607      | 1,613      | 1,003 |
| <i>alr2542</i> | 4,603      | 4,618      | 1,003 |
| <i>alr3364</i> | 35,118     | 35,260     | 1,004 |
| <i>rrn23Sa</i> | 111643,134 | 112114,414 | 1,004 |
| <i>all8045</i> | 22,478     | 22,638     | 1,007 |
| <i>rpoC1</i>   | 13,429     | 13,525     | 1,007 |
| <i>alr0055</i> | 0,000      | 1,008      | 1,008 |
| <i>rplT</i>    | 24,530     | 24,747     | 1,009 |
| <i>all8076</i> | 13,577     | 13,697     | 1,009 |
| <i>all0979</i> | 13,208     | 13,325     | 1,009 |
| <i>alr1128</i> | 2,414      | 2,436      | 1,009 |
| <i>alr1055</i> | 0,000      | 1,011      | 1,011 |
| <i>dapA</i>    | 16,624     | 16,846     | 1,013 |
| <i>nrtD</i>    | 11,760     | 11,917     | 1,013 |
| <i>alr2807</i> | 11,760     | 11,917     | 1,013 |
| <i>alr4898</i> | 4,670      | 4,733      | 1,013 |
| <i>alr4351</i> | 4,087      | 4,141      | 1,013 |
| <i>all5104</i> | 1,972      | 1,998      | 1,013 |
| <i>all5292</i> | 0,000      | 1,017      | 1,017 |
| <i>alr1834</i> | 8,189      | 8,328      | 1,017 |
| <i>rrn16Sd</i> | 245285,335 | 249629,196 | 1,018 |
| <i>all3660</i> | 24,799     | 25,247     | 1,018 |
| <i>alr0750</i> | 32,900     | 33,557     | 1,020 |
| <i>all4555</i> | 5,655      | 5,768      | 1,020 |
| <i>ycf44</i>   | 4,296      | 4,382      | 1,020 |
| <i>alr4526</i> | 9,643      | 9,860      | 1,023 |
| <i>all4182</i> | 16,180     | 16,544     | 1,023 |
| <i>alr4232</i> | 8,572      | 8,765      | 1,023 |
| <i>alr7622</i> | 2,654      | 2,719      | 1,025 |
| <i>all0184</i> | 5,456      | 5,591      | 1,025 |
| <i>all2770</i> | 6,502      | 6,685      | 1,028 |
| <i>alr1600</i> | 6,289      | 6,466      | 1,028 |
| <i>all2951</i> | 10,369     | 10,660     | 1,028 |
| <i>glcE</i>    | 6,216      | 6,391      | 1,028 |
| <i>nrtC_1</i>  | 12,776     | 13,147     | 1,029 |
| <i>rplJ</i>    | 16,680     | 17,192     | 1,031 |
| <i>psbZ_1</i>  | 45,310     | 46,701     | 1,031 |

|                |        |        |       |
|----------------|--------|--------|-------|
| <i>alr2372</i> | 8,929  | 9,203  | 1,031 |
| <i>all3314</i> | 2,055  | 2,118  | 1,031 |
| <i>asr3098</i> | 52,625 | 54,439 | 1,034 |
| <i>all3953</i> | 12,091 | 12,525 | 1,036 |
| <i>alr1531</i> | 13,858 | 14,409 | 1,040 |
| <i>all3568</i> | 8,173  | 8,589  | 1,051 |
| <i>all4540</i> | 2,538  | 2,667  | 1,051 |
| <i>all4217</i> | 2,245  | 2,360  | 1,051 |
| <i>alr1063</i> | 1,123  | 1,180  | 1,051 |
| <i>alr3625</i> | 0,989  | 1,040  | 1,051 |
| <i>atpG</i>    | 23,495 | 24,691 | 1,051 |
| <i>all2736</i> | 13,112 | 13,780 | 1,051 |
| <i>pex</i>     | 12,079 | 12,694 | 1,051 |
| <i>asl4562</i> | 9,867  | 10,369 | 1,051 |
| <i>alr8510</i> | 9,847  | 10,349 | 1,051 |
| <i>rplP</i>    | 9,798  | 10,297 | 1,051 |
| <i>ndhE</i>    | 6,868  | 7,218  | 1,051 |
| <i>alr2606</i> | 6,868  | 7,218  | 1,051 |
| <i>alr4264</i> | 6,568  | 6,902  | 1,051 |
| <i>alr0655</i> | 5,307  | 5,577  | 1,051 |
| <i>alr4583</i> | 5,062  | 5,320  | 1,051 |
| <i>all1590</i> | 4,934  | 5,185  | 1,051 |
| <i>asl4053</i> | 4,934  | 5,185  | 1,051 |
| <i>prfB</i>    | 4,782  | 5,025  | 1,051 |
| <i>alr1548</i> | 4,476  | 4,704  | 1,051 |
| <i>uvrC</i>    | 4,462  | 4,689  | 1,051 |
| <i>all1076</i> | 4,259  | 4,476  | 1,051 |
| <i>asr8082</i> | 3,936  | 4,136  | 1,051 |
| <i>alr4777</i> | 3,849  | 4,045  | 1,051 |
| <i>asl2848</i> | 3,538  | 3,718  | 1,051 |
| <i>all5247</i> | 3,384  | 3,557  | 1,051 |
| <i>all3908</i> | 3,284  | 3,451  | 1,051 |
| <i>alr2472</i> | 3,253  | 3,419  | 1,051 |
| <i>trmB</i>    | 3,184  | 3,346  | 1,051 |
| <i>all2121</i> | 3,175  | 3,336  | 1,051 |
| <i>pfkA</i>    | 2,935  | 3,085  | 1,051 |
| <i>alr3085</i> | 2,895  | 3,042  | 1,051 |
| <i>all3145</i> | 2,848  | 2,993  | 1,051 |
| <i>alr3027</i> | 2,356  | 2,476  | 1,051 |
| <i>alr7168</i> | 2,060  | 2,165  | 1,051 |
| <i>all7611</i> | 1,968  | 2,068  | 1,051 |
| <i>all1880</i> | 1,951  | 2,051  | 1,051 |

|                |        |        |       |
|----------------|--------|--------|-------|
| <i>alr4965</i> | 1,946  | 2,045  | 1,051 |
| <i>alr3372</i> | 1,868  | 1,963  | 1,051 |
| <i>all1515</i> | 1,717  | 1,804  | 1,051 |
| <i>all2511</i> | 1,709  | 1,796  | 1,051 |
| <i>all1251</i> | 1,629  | 1,712  | 1,051 |
| <i>alr2809</i> | 1,629  | 1,712  | 1,051 |
| <i>alr7207</i> | 1,466  | 1,540  | 1,051 |
| <i>all5069</i> | 1,424  | 1,496  | 1,051 |
| <i>alr3863</i> | 1,337  | 1,405  | 1,051 |
| <i>alr2723</i> | 1,168  | 1,227  | 1,051 |
| <i>all0412</i> | 1,098  | 1,154  | 1,051 |
| <i>all0454</i> | 1,098  | 1,154  | 1,051 |
| <i>alr1255</i> | 1,081  | 1,136  | 1,051 |
| <i>all2506</i> | 1,081  | 1,136  | 1,051 |
| <i>all3942</i> | 1,033  | 1,086  | 1,051 |
| <i>all7134</i> | 0,952  | 1,000  | 1,051 |
| <i>alr4031</i> | 0,820  | 0,862  | 1,051 |
| <i>all2956</i> | 0,637  | 0,669  | 1,051 |
| <i>alr5199</i> | 0,569  | 0,598  | 1,051 |
| <i>alr7540</i> | 0,422  | 0,444  | 1,051 |
| <i>all5112</i> | 0,420  | 0,441  | 1,051 |
| <i>alr1561</i> | 0,390  | 0,410  | 1,051 |
| <i>efp</i>     | 13,183 | 13,854 | 1,051 |
| <i>all1895</i> | 11,644 | 12,236 | 1,051 |
| <i>all4074</i> | 8,730  | 9,174  | 1,051 |
| <i>alr2019</i> | 7,349  | 7,723  | 1,051 |
| <i>alr0576</i> | 6,487  | 6,817  | 1,051 |
| <i>alr5253</i> | 5,852  | 6,150  | 1,051 |
| <i>all4257</i> | 5,338  | 5,609  | 1,051 |
| <i>all4749</i> | 5,189  | 5,454  | 1,051 |
| <i>asl4765</i> | 5,151  | 5,413  | 1,051 |
| <i>asl1243</i> | 4,798  | 5,043  | 1,051 |
| <i>asr1945</i> | 4,734  | 4,975  | 1,051 |
| <i>asl3409</i> | 3,574  | 3,756  | 1,051 |
| <i>alr2106</i> | 3,156  | 3,316  | 1,051 |
| <i>alr7378</i> | 3,118  | 3,277  | 1,051 |
| <i>recN</i>    | 3,004  | 3,157  | 1,051 |
| <i>all5172</i> | 2,802  | 2,945  | 1,051 |
| <i>all7344</i> | 2,780  | 2,922  | 1,051 |
| <i>all4817</i> | 2,737  | 2,876  | 1,051 |
| <i>alr1320</i> | 2,614  | 2,747  | 1,051 |
| <i>all2183</i> | 2,484  | 2,611  | 1,051 |

|                |        |        |       |
|----------------|--------|--------|-------|
| <i>alr2015</i> | 2,433  | 2,556  | 1,051 |
| <i>alr5158</i> | 2,383  | 2,504  | 1,051 |
| <i>rfbD</i>    | 2,375  | 2,496  | 1,051 |
| <i>all4424</i> | 2,351  | 2,471  | 1,051 |
| <i>all3316</i> | 2,260  | 2,375  | 1,051 |
| <i>all1149</i> | 2,149  | 2,258  | 1,051 |
| <i>all1122</i> | 2,048  | 2,153  | 1,051 |
| <i>all0767</i> | 1,883  | 1,979  | 1,051 |
| <i>alr0685</i> | 1,834  | 1,927  | 1,051 |
| <i>alr1138</i> | 1,820  | 1,912  | 1,051 |
| <i>all3255</i> | 1,585  | 1,666  | 1,051 |
| <i>alr0760</i> | 1,578  | 1,658  | 1,051 |
| <i>alr7078</i> | 1,557  | 1,636  | 1,051 |
| <i>all1842</i> | 1,472  | 1,547  | 1,051 |
| <i>alr3937</i> | 1,430  | 1,503  | 1,051 |
| <i>alr1404</i> | 1,396  | 1,467  | 1,051 |
| <i>all1756</i> | 1,278  | 1,343  | 1,051 |
| <i>all3035</i> | 1,220  | 1,283  | 1,051 |
| <i>alr4028</i> | 1,216  | 1,278  | 1,051 |
| <i>alr7049</i> | 1,160  | 1,219  | 1,051 |
| <i>alr3807</i> | 1,158  | 1,217  | 1,051 |
| <i>uppP</i>    | 1,091  | 1,147  | 1,051 |
| <i>alr2597</i> | 1,001  | 1,052  | 1,051 |
| <i>alr0790</i> | 0,995  | 1,046  | 1,051 |
| <i>all0983</i> | 0,970  | 1,020  | 1,051 |
| <i>alr2175</i> | 0,811  | 0,852  | 1,051 |
| <i>all3736</i> | 0,791  | 0,831  | 1,051 |
| <i>devB_2</i>  | 0,737  | 0,775  | 1,051 |
| <i>all5123</i> | 0,695  | 0,730  | 1,051 |
| <i>comM</i>    | 0,687  | 0,722  | 1,051 |
| <i>all3787</i> | 0,678  | 0,712  | 1,051 |
| <i>alr0709</i> | 0,390  | 0,410  | 1,051 |
| <i>all3500</i> | 0,341  | 0,359  | 1,051 |
| <i>alr2489</i> | 6,609  | 6,946  | 1,051 |
| <i>alr0718</i> | 4,020  | 4,224  | 1,051 |
| <i>all7317</i> | 2,836  | 2,981  | 1,051 |
| <i>alr1920</i> | 1,418  | 1,490  | 1,051 |
| <i>alr3395</i> | 11,622 | 12,356 | 1,063 |
| <i>alr3343</i> | 20,720 | 22,069 | 1,065 |
| <i>hemF</i>    | 13,585 | 14,470 | 1,065 |
| <i>all5077</i> | 12,922 | 13,822 | 1,070 |
| <i>all0775</i> | 5,124  | 5,481  | 1,070 |

|                |        |        |       |
|----------------|--------|--------|-------|
| <i>alr2520</i> | 0,000  | 1,070  | 1,070 |
| <i>alr5030</i> | 0,000  | 1,070  | 1,070 |
| <i>all4590</i> | 4,785  | 5,129  | 1,072 |
| <i>alr7628</i> | 6,332  | 6,787  | 1,072 |
| <i>rpsF</i>    | 23,566 | 25,329 | 1,075 |
| <i>surE_2</i>  | 8,340  | 8,995  | 1,079 |
| <i>all3530</i> | 5,282  | 5,697  | 1,079 |
| <i>all2004</i> | 5,294  | 5,722  | 1,081 |
| <i>all0158</i> | 7,103  | 7,698  | 1,084 |
| <i>secE</i>    | 25,246 | 27,360 | 1,084 |
| <i>asl4317</i> | 23,648 | 25,628 | 1,084 |
| <i>all1547</i> | 6,746  | 7,362  | 1,091 |
| <i>all5295</i> | 4,531  | 4,945  | 1,091 |
| <i>all2500</i> | 23,134 | 25,313 | 1,094 |
| <i>all0619</i> | 0,000  | 1,096  | 1,096 |
| <i>rbpA1</i>   | 26,073 | 28,591 | 1,097 |
| <i>pds</i>     | 11,190 | 12,270 | 1,097 |
| <i>rplA</i>    | 27,358 | 30,034 | 1,098 |
| <i>all2285</i> | 0,000  | 1,102  | 1,102 |
| <i>alr1607</i> | 10,963 | 12,098 | 1,103 |
| <i>alr3685</i> | 7,607  | 8,393  | 1,103 |
| <i>alr2543</i> | 5,121  | 5,651  | 1,103 |
| <i>ribD</i>    | 2,941  | 3,245  | 1,103 |
| <i>cphA_1</i>  | 1,833  | 2,023  | 1,103 |
| <i>infC_2</i>  | 17,087 | 18,855 | 1,103 |
| <i>rps7</i>    | 7,437  | 8,206  | 1,103 |
| <i>alr3833</i> | 5,724  | 6,316  | 1,103 |
| <i>alr3377</i> | 5,406  | 5,965  | 1,103 |
| <i>all1670</i> | 10,066 | 11,107 | 1,103 |
| <i>alr4625</i> | 3,730  | 4,116  | 1,103 |
| <i>patA</i>    | 3,073  | 3,391  | 1,103 |
| <i>tyrS</i>    | 2,926  | 3,229  | 1,103 |
| <i>all5097</i> | 4,990  | 5,506  | 1,103 |
| <i>all2507</i> | 2,949  | 3,254  | 1,103 |
| <i>all7030</i> | 2,061  | 2,274  | 1,103 |
| <i>all3030</i> | 0,000  | 1,109  | 1,109 |
| <i>all4983</i> | 0,000  | 1,109  | 1,109 |
| <i>nusG</i>    | 29,882 | 33,148 | 1,109 |
| <i>alr4331</i> | 11,540 | 12,841 | 1,113 |
| <i>all3023</i> | 0,000  | 1,115  | 1,115 |
| <i>nirA</i>    | 19,351 | 21,593 | 1,116 |
| <i>cphA_2</i>  | 12,427 | 13,876 | 1,117 |



|                |        |        |       |
|----------------|--------|--------|-------|
| <i>plsX</i>    | 29,361 | 32,829 | 1,118 |
| <i>alr1247</i> | 12,612 | 14,109 | 1,119 |
| <i>pyrH</i>    | 14,895 | 16,664 | 1,119 |
| <i>alr1859</i> | 0,000  | 1,122  | 1,122 |
| <i>rbpD_1</i>  | 8,603  | 9,687  | 1,126 |
| <i>all2546</i> | 4,491  | 5,057  | 1,126 |
| <i>all2108</i> | 4,046  | 4,556  | 1,126 |
| <i>alr8016</i> | 2,566  | 2,889  | 1,126 |
| <i>all1483</i> | 1,010  | 1,138  | 1,126 |
| <i>alr3178</i> | 4,347  | 4,895  | 1,126 |
| <i>all7375</i> | 16,478 | 18,554 | 1,126 |
| <i>asl4743</i> | 12,771 | 14,379 | 1,126 |
| <i>alr2719</i> | 9,021  | 10,158 | 1,126 |
| <i>all5255</i> | 6,287  | 7,079  | 1,126 |
| <i>alr3659</i> | 5,541  | 6,239  | 1,126 |
| <i>alr0816</i> | 5,307  | 5,976  | 1,126 |
| <i>lpxB</i>    | 4,246  | 4,781  | 1,126 |
| <i>all5196</i> | 3,855  | 4,341  | 1,126 |
| <i>all4139</i> | 3,420  | 3,851  | 1,126 |
| <i>phnE_2</i>  | 3,084  | 3,473  | 1,126 |
| <i>murQ</i>    | 2,654  | 2,988  | 1,126 |
| <i>alr0730</i> | 6,032  | 6,792  | 1,126 |
| <i>vapC_1</i>  | 6,010  | 6,767  | 1,126 |
| <i>all3130</i> | 5,108  | 5,752  | 1,126 |
| <i>all3835</i> | 4,618  | 5,199  | 1,126 |
| <i>ftsY</i>    | 4,483  | 5,047  | 1,126 |
| <i>alr2111</i> | 3,616  | 4,072  | 1,126 |
| <i>all3408</i> | 3,493  | 3,933  | 1,126 |
| <i>folE_2</i>  | 3,463  | 3,900  | 1,126 |
| <i>alr2467</i> | 3,096  | 3,486  | 1,126 |
| <i>alr4888</i> | 2,848  | 3,207  | 1,126 |
| <i>all4688</i> | 2,761  | 3,109  | 1,126 |
| <i>all1211</i> | 1,828  | 2,059  | 1,126 |
| <i>all4884</i> | 1,599  | 1,801  | 1,126 |
| <i>all7187</i> | 1,169  | 1,317  | 1,126 |
| <i>all8079</i> | 5,801  | 6,565  | 1,132 |
| <i>alr4150</i> | 11,358 | 12,891 | 1,135 |
| <i>all3873</i> | 11,099 | 12,597 | 1,135 |
| <i>alr2695</i> | 0,000  | 1,136  | 1,136 |
| <i>all1897</i> | 29,801 | 33,885 | 1,137 |
| <i>all0985</i> | 5,215  | 5,937  | 1,138 |
| <i>alr1978</i> | 3,352  | 3,816  | 1,138 |

|                |        |        |       |
|----------------|--------|--------|-------|
| <i>alr5307</i> | 46,958 | 53,517 | 1,140 |
| <i>alr0114</i> | 12,313 | 14,055 | 1,142 |
| <i>nrtA_1</i>  | 18,269 | 20,868 | 1,142 |
| <i>alr0856</i> | 7,057  | 8,090  | 1,146 |
| <i>alr4681</i> | 4,475  | 5,131  | 1,146 |
| <i>alr3350</i> | 4,197  | 4,812  | 1,146 |
| <i>asl2195</i> | 13,810 | 15,833 | 1,146 |
| <i>all4481</i> | 6,999  | 8,024  | 1,146 |
| <i>alr0295</i> | 5,512  | 6,320  | 1,146 |
| <i>alr2933</i> | 3,125  | 3,583  | 1,146 |
| <i>glmU</i>    | 2,842  | 3,258  | 1,146 |
| <i>all0182</i> | 1,794  | 2,057  | 1,146 |
| <i>all8013</i> | 9,514  | 10,907 | 1,146 |
| <i>all0316</i> | 4,339  | 4,975  | 1,146 |
| <i>alr7200</i> | 2,378  | 2,727  | 1,146 |
| <i>all2533</i> | 1,861  | 2,134  | 1,146 |
| <i>chlH_2</i>  | 1,045  | 1,198  | 1,146 |
| <i>all0746</i> | 0,000  | 1,150  | 1,150 |
| <i>all3586</i> | 0,000  | 1,150  | 1,150 |
| <i>alr3524</i> | 4,306  | 4,960  | 1,152 |
| <i>alr0402</i> | 43,128 | 49,745 | 1,153 |
| <i>all4502</i> | 11,005 | 12,694 | 1,153 |
| <i>all2384</i> | 3,202  | 3,701  | 1,156 |
| <i>all1826</i> | 7,328  | 8,471  | 1,156 |
| <i>glgC</i>    | 14,391 | 16,694 | 1,160 |
| <i>groEL_1</i> | 3,954  | 4,593  | 1,162 |
| <i>alr4255</i> | 5,065  | 5,883  | 1,162 |
| <i>alr3170</i> | 2,628  | 3,062  | 1,165 |
| <i>all1023</i> | 15,705 | 18,298 | 1,165 |
| <i>alr2697</i> | 0,000  | 1,172  | 1,172 |
| <i>alr3535</i> | 0,000  | 1,172  | 1,172 |
| <i>narB</i>    | 7,346  | 8,624  | 1,174 |
| <i>all3403</i> | 5,814  | 6,874  | 1,182 |
| <i>ubiA_2</i>  | 3,210  | 3,795  | 1,182 |
| <i>alr3996</i> | 2,566  | 3,034  | 1,182 |
| <i>all2438</i> | 2,347  | 2,775  | 1,182 |
| <i>cbiO_2</i>  | 2,256  | 2,667  | 1,182 |
| <i>all4835</i> | 2,147  | 2,539  | 1,182 |
| <i>all0389</i> | 1,705  | 2,015  | 1,182 |
| <i>alr5256</i> | 1,698  | 2,008  | 1,182 |
| <i>alr2532</i> | 1,547  | 1,828  | 1,182 |
| <i>queA</i>    | 1,173  | 1,387  | 1,182 |

|                |        |        |       |
|----------------|--------|--------|-------|
| <i>alr1909</i> | 1,123  | 1,327  | 1,182 |
| <i>alr1666</i> | 0,957  | 1,131  | 1,182 |
| <i>all4374</i> | 0,805  | 0,952  | 1,182 |
| <i>all4052</i> | 0,737  | 0,871  | 1,182 |
| <i>alr3183</i> | 18,197 | 21,513 | 1,182 |
| <i>all4107</i> | 6,902  | 8,160  | 1,182 |
| <i>all0156</i> | 2,684  | 3,173  | 1,182 |
| <i>alr2974</i> | 2,162  | 2,556  | 1,182 |
| <i>all1616</i> | 2,048  | 2,422  | 1,182 |
| <i>all7629</i> | 2,013  | 2,380  | 1,182 |
| <i>all4402</i> | 1,930  | 2,282  | 1,182 |
| <i>all3317</i> | 1,895  | 2,241  | 1,182 |
| <i>all1418</i> | 1,680  | 1,986  | 1,182 |
| <i>alr3762</i> | 1,586  | 1,875  | 1,182 |
| <i>alr0247</i> | 1,531  | 1,810  | 1,182 |
| <i>coxA_3</i>  | 0,840  | 0,993  | 1,182 |
| <i>alr3676</i> | 0,719  | 0,849  | 1,182 |
| <i>alr3402</i> | 7,916  | 9,359  | 1,182 |
| <i>all0471</i> | 6,802  | 8,041  | 1,182 |
| <i>all2681</i> | 6,487  | 7,669  | 1,182 |
| <i>all3254</i> | 6,398  | 7,564  | 1,182 |
| <i>all4573</i> | 4,702  | 5,559  | 1,182 |
| <i>alr2055</i> | 3,925  | 4,640  | 1,182 |
| <i>alr7349</i> | 3,736  | 4,417  | 1,182 |
| <i>alr0018</i> | 3,538  | 4,183  | 1,182 |
| <i>alr7169</i> | 3,281  | 3,879  | 1,182 |
| <i>alr1056</i> | 3,073  | 3,633  | 1,182 |
| <i>phnG</i>    | 3,073  | 3,633  | 1,182 |
| <i>alr0214</i> | 2,975  | 3,517  | 1,182 |
| <i>all4038</i> | 2,865  | 3,388  | 1,182 |
| <i>all2750</i> | 2,700  | 3,192  | 1,182 |
| <i>all4759</i> | 2,375  | 2,808  | 1,182 |
| <i>alr3200</i> | 2,312  | 2,734  | 1,182 |
| <i>all3578</i> | 2,128  | 2,516  | 1,182 |
| <i>all0089</i> | 2,104  | 2,487  | 1,182 |
| <i>all7331</i> | 1,987  | 2,350  | 1,182 |
| <i>all1253</i> | 1,954  | 2,310  | 1,182 |
| <i>alr8542</i> | 1,954  | 2,310  | 1,182 |
| <i>all2013</i> | 1,946  | 2,301  | 1,182 |
| <i>all0955</i> | 1,891  | 2,236  | 1,182 |
| <i>alr4072</i> | 1,891  | 2,236  | 1,182 |
| <i>alr1077</i> | 1,876  | 2,218  | 1,182 |

|                |        |        |       |
|----------------|--------|--------|-------|
| <i>all0464</i> | 1,842  | 2,178  | 1,182 |
| <i>dapF_1</i>  | 1,668  | 1,972  | 1,182 |
| <i>all3574</i> | 1,656  | 1,958  | 1,182 |
| <i>all1807</i> | 1,639  | 1,937  | 1,182 |
| <i>all1228</i> | 1,562  | 1,847  | 1,182 |
| <i>alr1653</i> | 1,478  | 1,747  | 1,182 |
| <i>all4705</i> | 1,455  | 1,720  | 1,182 |
| <i>alr2213</i> | 1,433  | 1,694  | 1,182 |
| <i>alr1000</i> | 1,294  | 1,530  | 1,182 |
| <i>alr0719</i> | 1,185  | 1,401  | 1,182 |
| <i>patB</i>    | 0,881  | 1,042  | 1,182 |
| <i>all5311</i> | 0,548  | 0,648  | 1,182 |
| <i>alr1927</i> | 0,462  | 0,546  | 1,182 |
| <i>mutT_1</i>  | 3,177  | 3,756  | 1,182 |
| <i>lspA</i>    | 2,937  | 3,473  | 1,182 |
| <i>alr2060</i> | 2,780  | 3,287  | 1,182 |
| <i>alr0199</i> | 2,624  | 3,102  | 1,182 |
| <i>all0580</i> | 1,810  | 2,140  | 1,182 |
| <i>all1950</i> | 1,207  | 1,427  | 1,182 |
| <i>alr2188</i> | 1,071  | 1,266  | 1,182 |
| <i>alr0440</i> | 0,831  | 0,983  | 1,182 |
| <i>all4220</i> | 25,184 | 30,075 | 1,194 |
| <i>all0748</i> | 24,542 | 29,308 | 1,194 |
| <i>all1694</i> | 8,397  | 10,085 | 1,201 |
| <i>cmpA</i>    | 0,000  | 1,203  | 1,203 |
| <i>all7021</i> | 0,000  | 1,203  | 1,203 |
| <i>alr3525</i> | 4,659  | 5,617  | 1,205 |
| <i>all8078</i> | 1,334  | 1,608  | 1,205 |
| <i>alr2764</i> | 5,000  | 6,027  | 1,205 |
| <i>all0200</i> | 4,649  | 5,604  | 1,205 |
| <i>all2275</i> | 7,784  | 9,439  | 1,213 |
| <i>alr3607</i> | 6,515  | 7,899  | 1,213 |
| <i>alr3877</i> | 3,271  | 3,967  | 1,213 |
| <i>alr5049</i> | 8,929  | 10,827 | 1,213 |
| <i>all2491</i> | 6,657  | 8,073  | 1,213 |
| <i>all7655</i> | 0,000  | 1,215  | 1,215 |
| <i>icd</i>     | 11,824 | 14,367 | 1,215 |
| <i>all3687</i> | 20,226 | 24,638 | 1,218 |
| <i>alr2350</i> | 14,874 | 18,171 | 1,222 |
| <i>all3325</i> | 11,796 | 14,421 | 1,222 |
| <i>all0888</i> | 4,434  | 5,436  | 1,226 |
| <i>alr3529</i> | 5,473  | 6,710  | 1,226 |

|                |         |         |       |
|----------------|---------|---------|-------|
| <i>all2110</i> | 5,202   | 6,378   | 1,226 |
| <i>alr2535</i> | 3,907   | 4,790   | 1,226 |
| <i>alr0024</i> | 3,849   | 4,719   | 1,226 |
| <i>all3274</i> | 3,574   | 4,382   | 1,226 |
| <i>all4820</i> | 1,671   | 2,048   | 1,226 |
| <i>alr1031</i> | 1,275   | 1,564   | 1,226 |
| <i>alr2279</i> | 0,808   | 0,991   | 1,226 |
| <i>alr2398</i> | 2,433   | 2,982   | 1,226 |
| <i>all4152</i> | 2,330   | 2,857   | 1,226 |
| <i>all0889</i> | 6,936   | 8,504   | 1,226 |
| <i>all4617</i> | 6,609   | 8,103   | 1,226 |
| <i>all5306</i> | 4,026   | 4,936   | 1,226 |
| <i>alr1603</i> | 3,624   | 4,443   | 1,226 |
| <i>desA</i>    | 2,994   | 3,671   | 1,226 |
| <i>bioF</i>    | 2,715   | 3,329   | 1,226 |
| <i>all1484</i> | 0,000   | 1,227   | 1,227 |
| <i>all2883</i> | 6,086   | 7,479   | 1,229 |
| <i>rpsM</i>    | 29,420  | 36,232  | 1,232 |
| <i>all2085</i> | 8,776   | 10,827  | 1,234 |
| <i>alr3606</i> | 6,231   | 7,687   | 1,234 |
| <i>all4955</i> | 2,693   | 3,335   | 1,239 |
| <i>alr1308</i> | 2,790   | 3,455   | 1,239 |
| <i>alr4487</i> | 1,640   | 2,031   | 1,239 |
| <i>all4441</i> | 4,836   | 5,990   | 1,239 |
| <i>all2981</i> | 8,561   | 10,624  | 1,241 |
| <i>all4503</i> | 23,904  | 29,710  | 1,243 |
| <i>all4872</i> | 0,000   | 1,244   | 1,244 |
| <i>era</i>     | 6,563   | 8,168   | 1,244 |
| <i>all1873</i> | 197,286 | 247,525 | 1,255 |
| <i>alr3091</i> | 2,402   | 3,030   | 1,261 |
| <i>trpE_1</i>  | 0,793   | 1,000   | 1,261 |
| <i>all3797</i> | 15,598  | 19,670  | 1,261 |
| <i>hemK</i>    | 9,571   | 12,069  | 1,261 |
| <i>asr0798</i> | 7,207   | 9,089   | 1,261 |
| <i>asl3860</i> | 6,415   | 8,090   | 1,261 |
| <i>all5036</i> | 6,198   | 7,816   | 1,261 |
| <i>all2107</i> | 4,597   | 5,797   | 1,261 |
| <i>all0945</i> | 3,496   | 4,409   | 1,261 |
| <i>all1508</i> | 3,243   | 4,090   | 1,261 |
| <i>degT</i>    | 3,049   | 3,845   | 1,261 |
| <i>all1846</i> | 2,572   | 3,243   | 1,261 |
| <i>alr8029</i> | 2,326   | 2,933   | 1,261 |

|                |        |        |       |
|----------------|--------|--------|-------|
| <i>all0475</i> | 2,263  | 2,854  | 1,261 |
| <i>alr4807</i> | 1,673  | 2,110  | 1,261 |
| <i>alr5235</i> | 1,673  | 2,110  | 1,261 |
| <i>all7222</i> | 1,673  | 2,110  | 1,261 |
| <i>sqdX</i>    | 1,540  | 1,943  | 1,261 |
| <i>alr4808</i> | 1,374  | 1,732  | 1,261 |
| <i>alr2831</i> | 1,333  | 1,681  | 1,261 |
| <i>alr3997</i> | 1,175  | 1,481  | 1,261 |
| <i>alr3101</i> | 10,811 | 13,634 | 1,261 |
| <i>all4757</i> | 9,980  | 12,585 | 1,261 |
| <i>sat</i>     | 8,913  | 11,240 | 1,261 |
| <i>all2473</i> | 8,779  | 11,071 | 1,261 |
| <i>alr3603</i> | 7,733  | 9,751  | 1,261 |
| <i>alr0643</i> | 7,298  | 9,203  | 1,261 |
| <i>alr3901</i> | 7,076  | 8,924  | 1,261 |
| <i>chlD</i>    | 6,019  | 7,590  | 1,261 |
| <i>all1239</i> | 4,200  | 5,297  | 1,261 |
| <i>alr2577</i> | 4,185  | 5,278  | 1,261 |
| <i>all0571</i> | 3,971  | 5,008  | 1,261 |
| <i>all1765</i> | 3,139  | 3,958  | 1,261 |
| <i>recF</i>    | 3,097  | 3,906  | 1,261 |
| <i>all4443</i> | 2,612  | 3,294  | 1,261 |
| <i>all1736</i> | 2,516  | 3,173  | 1,261 |
| <i>trpA_2</i>  | 2,187  | 2,757  | 1,261 |
| <i>all0400</i> | 2,078  | 2,620  | 1,261 |
| <i>all0351</i> | 1,927  | 2,430  | 1,261 |
| <i>alr0786</i> | 1,692  | 2,134  | 1,261 |
| <i>alr0150</i> | 1,608  | 2,028  | 1,261 |
| <i>all1325</i> | 1,565  | 1,974  | 1,261 |
| <i>alr2816</i> | 1,450  | 1,829  | 1,261 |
| <i>alr3510</i> | 1,370  | 1,728  | 1,261 |
| <i>all5153</i> | 1,168  | 1,472  | 1,261 |
| <i>alr4878</i> | 0,620  | 0,782  | 1,261 |
| <i>all4375</i> | 8,714  | 10,988 | 1,261 |
| <i>all1141</i> | 4,140  | 5,221  | 1,261 |
| <i>alr3799</i> | 10,267 | 13,011 | 1,267 |
| <i>pys</i>     | 13,516 | 17,163 | 1,270 |
| <i>all2952</i> | 5,560  | 7,060  | 1,270 |
| <i>murD</i>    | 7,818  | 9,938  | 1,271 |
| <i>all1731</i> | 4,769  | 6,062  | 1,271 |
| <i>alr1217</i> | 4,235  | 5,404  | 1,276 |
| <i>alr1129</i> | 13,252 | 16,938 | 1,278 |

|                |        |        |       |
|----------------|--------|--------|-------|
| <i>mutT_2</i>  | 0,000  | 1,278  | 1,278 |
| <i>all3324</i> | 12,973 | 16,616 | 1,281 |
| <i>alr4847</i> | 10,544 | 13,543 | 1,284 |
| <i>all0268</i> | 5,017  | 6,471  | 1,290 |
| <i>all0355</i> | 3,976  | 5,129  | 1,290 |
| <i>alr1621</i> | 2,261  | 2,916  | 1,290 |
| <i>all3154</i> | 2,214  | 2,856  | 1,290 |
| <i>all4581</i> | 6,145  | 7,926  | 1,290 |
| <i>alr2374</i> | 9,880  | 12,742 | 1,290 |
| <i>hemC</i>    | 13,512 | 17,477 | 1,293 |
| <i>alr1929</i> | 0,000  | 1,301  | 1,301 |
| <i>all3144</i> | 9,288  | 12,131 | 1,306 |
| <i>clpS_2</i>  | 7,453  | 9,790  | 1,314 |
| <i>asr1289</i> | 19,734 | 25,924 | 1,314 |
| <i>ndhH</i>    | 8,868  | 11,649 | 1,314 |
| <i>all8088</i> | 7,784  | 10,225 | 1,314 |
| <i>alr5045</i> | 1,147  | 1,506  | 1,314 |
| <i>all2547</i> | 17,963 | 23,597 | 1,314 |
| <i>all4999</i> | 9,372  | 12,312 | 1,314 |
| <i>alr2569</i> | 5,004  | 6,573  | 1,314 |
| <i>all4694</i> | 4,549  | 5,976  | 1,314 |
| <i>alr4850</i> | 3,871  | 5,084  | 1,314 |
| <i>alr1024</i> | 3,451  | 4,533  | 1,314 |
| <i>alr2751</i> | 3,199  | 4,202  | 1,314 |
| <i>all3016</i> | 3,170  | 4,164  | 1,314 |
| <i>alr4045</i> | 3,086  | 4,054  | 1,314 |
| <i>opcA</i>    | 3,046  | 4,001  | 1,314 |
| <i>alr1665</i> | 2,968  | 3,900  | 1,314 |
| <i>all5017</i> | 2,956  | 3,883  | 1,314 |
| <i>all0135</i> | 2,859  | 3,756  | 1,314 |
| <i>alr4786</i> | 2,791  | 3,666  | 1,314 |
| <i>radA</i>    | 1,379  | 1,812  | 1,314 |
| <i>nadE</i>    | 1,236  | 1,623  | 1,314 |
| <i>all0320</i> | 2,399  | 3,152  | 1,314 |
| <i>all4289</i> | 10,561 | 13,874 | 1,314 |
| <i>all0569</i> | 5,189  | 6,817  | 1,314 |
| <i>alr</i>     | 3,485  | 4,579  | 1,314 |
| <i>all2891</i> | 2,705  | 3,553  | 1,314 |
| <i>alr3450</i> | 2,705  | 3,553  | 1,314 |
| <i>all0438</i> | 1,033  | 1,357  | 1,314 |
| <i>all3691</i> | 0,346  | 0,455  | 1,314 |
| <i>cmpB</i>    | 0,000  | 1,315  | 1,315 |

|                |        |        |       |
|----------------|--------|--------|-------|
| <i>all5006</i> | 0,000  | 1,315  | 1,315 |
| <i>all0334</i> | 47,365 | 62,510 | 1,320 |
| <i>clpP_2</i>  | 29,065 | 38,707 | 1,332 |
| <i>alr7637</i> | 0,000  | 1,334  | 1,334 |
| <i>alr0051</i> | 7,824  | 10,436 | 1,334 |
| <i>alr0276</i> | 0,646  | 0,862  | 1,334 |
| <i>all5267</i> | 6,246  | 8,332  | 1,334 |
| <i>alr4766</i> | 3,343  | 4,460  | 1,334 |
| <i>alr4238</i> | 1,282  | 1,717  | 1,340 |
| <i>alr0267</i> | 5,710  | 7,650  | 1,340 |
| <i>mreB</i>    | 4,697  | 6,347  | 1,351 |
| <i>alr0486</i> | 3,665  | 4,952  | 1,351 |
| <i>alr3720</i> | 6,287  | 8,495  | 1,351 |
| <i>all2334</i> | 1,685  | 2,277  | 1,351 |
| <i>all3237</i> | 5,206  | 7,034  | 1,351 |
| <i>alr3599</i> | 4,738  | 6,402  | 1,351 |
| <i>all1758</i> | 3,523  | 4,760  | 1,351 |
| <i>alr2001</i> | 3,005  | 4,060  | 1,351 |
| <i>all2177</i> | 2,771  | 3,744  | 1,351 |
| <i>alr0370</i> | 3,478  | 4,699  | 1,351 |
| <i>all2776</i> | 2,112  | 2,854  | 1,351 |
| <i>alr4412</i> | 0,996  | 1,345  | 1,351 |
| <i>devR</i>    | 0,000  | 1,363  | 1,363 |
| <i>alr7240</i> | 0,000  | 1,363  | 1,363 |
| <i>alr8014</i> | 0,000  | 1,363  | 1,363 |
| <i>alr4515</i> | 2,968  | 4,056  | 1,366 |
| <i>alr2752</i> | 8,846  | 12,085 | 1,366 |
| <i>all1290</i> | 8,714  | 11,904 | 1,366 |
| <i>all0839</i> | 5,705  | 7,794  | 1,366 |
| <i>all4306</i> | 0,000  | 1,374  | 1,374 |
| <i>all0172</i> | 6,868  | 9,474  | 1,379 |
| <i>all3782</i> | 3,434  | 4,737  | 1,379 |
| <i>alr4529</i> | 4,345  | 5,993  | 1,379 |
| <i>all3509</i> | 2,947  | 4,064  | 1,379 |
| <i>alr7562</i> | 2,301  | 3,173  | 1,379 |
| <i>asl0715</i> | 65,550 | 90,414 | 1,379 |
| <i>coaE</i>    | 4,742  | 6,540  | 1,379 |
| <i>alr1324</i> | 2,071  | 2,857  | 1,379 |
| <i>alr7508</i> | 1,926  | 2,656  | 1,379 |
| <i>alr4909</i> | 1,895  | 2,613  | 1,379 |
| <i>asr1314</i> | 10,495 | 14,476 | 1,379 |
| <i>alr2044</i> | 0,919  | 1,268  | 1,379 |



|                |          |           |       |
|----------------|----------|-----------|-------|
| <i>alr1685</i> | 0,000    | 1,384     | 1,384 |
| <i>all4465</i> | 12,139   | 16,857    | 1,389 |
| <i>all0988</i> | 4,962    | 6,902     | 1,391 |
| <i>alr3142</i> | 17,963   | 25,049    | 1,394 |
| <i>alr0583</i> | 4,064    | 5,667     | 1,394 |
| <i>all7178</i> | 8,982    | 12,585    | 1,401 |
| <i>alr2983</i> | 4,397    | 6,161     | 1,401 |
| <i>avtA</i>    | 2,455    | 3,440     | 1,401 |
| <i>all1683</i> | 13,370   | 18,734    | 1,401 |
| <i>alr1555</i> | 3,599    | 5,043     | 1,401 |
| <i>all3378</i> | 3,357    | 4,704     | 1,401 |
| <i>alr1619</i> | 3,165    | 4,435     | 1,401 |
| <i>rca</i>     | 2,532    | 3,548     | 1,401 |
| <i>proA</i>    | 2,394    | 3,354     | 1,401 |
| <i>all0875</i> | 1,900    | 2,663     | 1,401 |
| <i>all7188</i> | 0,000    | 1,409     | 1,409 |
| <i>hisH</i>    | 10,464   | 14,759    | 1,410 |
| <i>def</i>     | 11,800   | 16,643    | 1,410 |
| <i>all3977</i> | 6,828    | 9,687     | 1,419 |
| <i>alr3689</i> | 5,406    | 7,669     | 1,419 |
| <i>upp</i>     | 5,381    | 7,634     | 1,419 |
| <i>alr1282</i> | 3,879    | 5,503     | 1,419 |
| <i>all0978</i> | 0,984    | 1,396     | 1,419 |
| <i>all1730</i> | 2,220    | 3,149     | 1,419 |
| <i>sdhA</i>    | 2,027    | 2,876     | 1,419 |
| <i>nrtB_1</i>  | 12,927   | 18,406    | 1,424 |
| <i>all1601</i> | 6,161    | 8,787     | 1,426 |
| <i>alr3644</i> | 4,040    | 5,761     | 1,426 |
| <i>all2701</i> | 0,000    | 1,427     | 1,427 |
| <i>rrn23Sc</i> | 4945,827 | 7072,604  | 1,430 |
| <i>rrn23Sb</i> | 9795,288 | 14031,768 | 1,433 |
| <i>rrn23Sd</i> | 4975,801 | 7128,056  | 1,433 |
| <i>all7632</i> | 2,285    | 3,275     | 1,433 |
| <i>asl7246</i> | 18,090   | 25,924    | 1,433 |
| <i>alr1136</i> | 7,381    | 10,578    | 1,433 |
| <i>all7024</i> | 2,880    | 4,127     | 1,433 |
| <i>all1797</i> | 24,060   | 34,580    | 1,437 |
| <i>alr2429</i> | 0,000    | 1,438     | 1,438 |
| <i>alr3477</i> | 0,000    | 1,438     | 1,438 |
| <i>alr7579</i> | 0,000    | 1,438     | 1,438 |
| <i>all1587</i> | 3,920    | 5,643     | 1,439 |
| <i>alr3699</i> | 0,000    | 1,442     | 1,442 |

|                |        |        |       |
|----------------|--------|--------|-------|
| <i>all0215</i> | 6,578  | 9,505  | 1,445 |
| <i>glnH</i>    | 5,151  | 7,443  | 1,445 |
| <i>argC_1</i>  | 4,338  | 6,268  | 1,445 |
| <i>all2806</i> | 5,854  | 8,480  | 1,449 |
| <i>alr4537</i> | 11,999 | 17,460 | 1,455 |
| <i>hetR</i>    | 15,179 | 22,087 | 1,455 |
| <i>thrC_1</i>  | 12,510 | 18,203 | 1,455 |
| <i>alr0240</i> | 5,181  | 7,538  | 1,455 |
| <i>murF</i>    | 3,358  | 4,886  | 1,455 |
| <i>all1812</i> | 0,000  | 1,461  | 1,461 |
| <i>all3903</i> | 0,000  | 1,461  | 1,461 |
| <i>all3802</i> | 7,076  | 10,358 | 1,464 |
| <i>alr3995</i> | 3,874  | 5,670  | 1,464 |
| <i>alr5168</i> | 5,108  | 7,477  | 1,464 |
| <i>alr3140</i> | 3,841  | 5,651  | 1,471 |
| <i>alr3723</i> | 1,920  | 2,825  | 1,471 |
| <i>all8520</i> | 7,237  | 10,648 | 1,471 |
| <i>alr1157</i> | 17,630 | 25,968 | 1,473 |
| <i>alr1241</i> | 9,452  | 14,023 | 1,484 |
| <i>all5207</i> | 5,077  | 7,558  | 1,489 |
| <i>alr2662</i> | 0,000  | 1,490  | 1,490 |
| <i>hetP_3</i>  | 0,000  | 1,496  | 1,496 |
| <i>alr1905</i> | 19,624 | 29,387 | 1,498 |
| <i>coxB_1</i>  | 6,560  | 9,823  | 1,498 |
| <i>ftsW</i>    | 6,470  | 9,736  | 1,505 |
| <i>thiG</i>    | 4,828  | 7,328  | 1,518 |
| <i>alr0831</i> | 0,000  | 1,521  | 1,521 |
| <i>leuC</i>    | 7,984  | 12,192 | 1,527 |
| <i>all5102</i> | 0,000  | 1,527  | 1,527 |
| <i>alr3276</i> | 12,310 | 18,817 | 1,529 |
| <i>alr1560</i> | 0,000  | 1,534  | 1,534 |
| <i>alr4172</i> | 11,628 | 17,947 | 1,544 |
| <i>all2813</i> | 0,000  | 1,560  | 1,560 |
| <i>alr3417</i> | 7,555  | 11,910 | 1,576 |
| <i>all4287</i> | 6,769  | 10,670 | 1,576 |
| <i>asr4524</i> | 5,766  | 9,089  | 1,576 |
| <i>all0458</i> | 4,541  | 7,158  | 1,576 |
| <i>all5304</i> | 3,510  | 5,533  | 1,576 |
| <i>alr3199</i> | 2,985  | 4,706  | 1,576 |
| <i>all0675</i> | 2,538  | 4,001  | 1,576 |
| <i>all2924</i> | 2,335  | 3,681  | 1,576 |
| <i>alr4695</i> | 2,335  | 3,681  | 1,576 |

|                |        |        |       |
|----------------|--------|--------|-------|
| <i>kaiA</i>    | 2,267  | 3,574  | 1,576 |
| <i>all5133</i> | 2,267  | 3,574  | 1,576 |
| <i>all4539</i> | 2,080  | 3,279  | 1,576 |
| <i>alr2984</i> | 1,954  | 3,080  | 1,576 |
| <i>all0265</i> | 1,873  | 2,953  | 1,576 |
| <i>asl4805</i> | 1,769  | 2,789  | 1,576 |
| <i>asr4588</i> | 1,692  | 2,667  | 1,576 |
| <i>all0807</i> | 1,510  | 2,380  | 1,576 |
| <i>alr4484</i> | 1,447  | 2,282  | 1,576 |
| <i>mazE</i>    | 1,441  | 2,272  | 1,576 |
| <i>all0467</i> | 1,331  | 2,098  | 1,576 |
| <i>all4639</i> | 1,188  | 1,873  | 1,576 |
| <i>all2962</i> | 1,134  | 1,787  | 1,576 |
| <i>all5002</i> | 1,123  | 1,770  | 1,576 |
| <i>alr4553</i> | 0,989  | 1,560  | 1,576 |
| <i>all1363</i> | 0,961  | 1,515  | 1,576 |
| <i>all5003</i> | 0,855  | 1,348  | 1,576 |
| <i>all0938</i> | 0,846  | 1,334  | 1,576 |
| <i>all2424</i> | 0,805  | 1,269  | 1,576 |
| <i>alr2582</i> | 0,721  | 1,136  | 1,576 |
| <i>alr1002</i> | 0,699  | 1,102  | 1,576 |
| <i>all1256</i> | 0,699  | 1,102  | 1,576 |
| <i>alr1977</i> | 0,642  | 1,011  | 1,576 |
| <i>cobU</i>    | 0,642  | 1,011  | 1,576 |
| <i>all2040</i> | 0,626  | 0,987  | 1,576 |
| <i>all3695</i> | 0,600  | 0,946  | 1,576 |
| <i>all7220</i> | 0,587  | 0,925  | 1,576 |
| <i>alr1139</i> | 0,567  | 0,893  | 1,576 |
| <i>all0563</i> | 0,561  | 0,885  | 1,576 |
| <i>all0906</i> | 0,480  | 0,757  | 1,576 |
| <i>all8065</i> | 0,442  | 0,697  | 1,576 |
| <i>alr4905</i> | 0,423  | 0,667  | 1,576 |
| <i>alr2510</i> | 0,368  | 0,581  | 1,576 |
| <i>alr2591</i> | 0,355  | 0,559  | 1,576 |
| <i>all4722</i> | 0,330  | 0,520  | 1,576 |
| <i>alr3162</i> | 0,316  | 0,499  | 1,576 |
| <i>all1012</i> | 0,270  | 0,425  | 1,576 |
| <i>alr3754</i> | 0,269  | 0,424  | 1,576 |
| <i>all0390</i> | 0,201  | 0,317  | 1,576 |
| <i>asl3264</i> | 14,371 | 22,653 | 1,576 |
| <i>all8063</i> | 11,783 | 18,575 | 1,576 |
| <i>alr8025</i> | 11,512 | 18,146 | 1,576 |

|                |       |        |       |
|----------------|-------|--------|-------|
| <i>cheW</i>    | 9,895 | 15,598 | 1,576 |
| <i>asl4748</i> | 9,218 | 14,531 | 1,576 |
| <i>rplW</i>    | 7,784 | 12,270 | 1,576 |
| <i>asr4314</i> | 7,185 | 11,327 | 1,576 |
| <i>asl3851</i> | 7,034 | 11,088 | 1,576 |
| <i>all1723</i> | 6,895 | 10,870 | 1,576 |
| <i>rplV</i>    | 6,811 | 10,737 | 1,576 |
| <i>alr7661</i> | 5,413 | 8,532  | 1,576 |
| <i>alr7204</i> | 5,202 | 8,201  | 1,576 |
| <i>petC_1</i>  | 5,114 | 8,061  | 1,576 |
| <i>all5098</i> | 4,831 | 7,616  | 1,576 |
| <i>alr7507</i> | 4,246 | 6,693  | 1,576 |
| <i>alr1057</i> | 4,097 | 6,458  | 1,576 |
| <i>alr8033</i> | 3,980 | 6,275  | 1,576 |
| <i>alr0957</i> | 3,892 | 6,135  | 1,576 |
| <i>alr5217</i> | 3,871 | 6,101  | 1,576 |
| <i>all0155</i> | 3,849 | 6,068  | 1,576 |
| <i>all0065</i> | 2,994 | 4,719  | 1,576 |
| <i>asr1899</i> | 2,994 | 4,719  | 1,576 |
| <i>asl3523</i> | 2,994 | 4,719  | 1,576 |
| <i>alr3896</i> | 2,951 | 4,651  | 1,576 |
| <i>all3536</i> | 2,780 | 4,382  | 1,576 |
| <i>all0398</i> | 2,737 | 4,314  | 1,576 |
| <i>all2693</i> | 2,737 | 4,314  | 1,576 |
| <i>asr1775</i> | 2,624 | 4,136  | 1,576 |
| <i>ntcB</i>    | 2,611 | 4,116  | 1,576 |
| <i>all1367</i> | 2,525 | 3,980  | 1,576 |
| <i>alr0920</i> | 2,499 | 3,939  | 1,576 |
| <i>alr7201</i> | 2,498 | 3,937  | 1,576 |
| <i>all0481</i> | 2,484 | 3,916  | 1,576 |
| <i>alr3444</i> | 2,477 | 3,904  | 1,576 |
| <i>all2017</i> | 2,450 | 3,861  | 1,576 |
| <i>alr4706</i> | 2,289 | 3,609  | 1,576 |
| <i>all4774</i> | 2,275 | 3,586  | 1,576 |
| <i>alr5188</i> | 2,094 | 3,301  | 1,576 |
| <i>asr1836</i> | 2,085 | 3,287  | 1,576 |
| <i>all4292</i> | 2,085 | 3,287  | 1,576 |
| <i>alr2482</i> | 2,031 | 3,201  | 1,576 |
| <i>all2088</i> | 2,013 | 3,173  | 1,576 |
| <i>alr5129</i> | 1,996 | 3,146  | 1,576 |
| <i>alr4758</i> | 1,796 | 2,832  | 1,576 |
| <i>asr0257</i> | 1,717 | 2,707  | 1,576 |

|                |       |       |       |
|----------------|-------|-------|-------|
| <i>mop</i>     | 1,668 | 2,629 | 1,576 |
| <i>asr7343</i> | 1,668 | 2,629 | 1,576 |
| <i>asr1344</i> | 1,645 | 2,592 | 1,576 |
| <i>asl2400</i> | 1,645 | 2,592 | 1,576 |
| <i>cyaB1</i>   | 1,629 | 2,568 | 1,576 |
| <i>asr5313</i> | 1,622 | 2,556 | 1,576 |
| <i>alr1946</i> | 1,536 | 2,422 | 1,576 |
| <i>alr0998</i> | 1,531 | 2,414 | 1,576 |
| <i>asr1213</i> | 1,497 | 2,360 | 1,576 |
| <i>asr4302</i> | 1,497 | 2,360 | 1,576 |
| <i>asl5041</i> | 1,497 | 2,360 | 1,576 |
| <i>asr8513</i> | 1,497 | 2,360 | 1,576 |
| <i>all0275</i> | 1,477 | 2,328 | 1,576 |
| <i>alr1174</i> | 1,472 | 2,320 | 1,576 |
| <i>alr5227</i> | 1,450 | 2,286 | 1,576 |
| <i>all7510</i> | 1,450 | 2,286 | 1,576 |
| <i>all0263</i> | 1,449 | 2,284 | 1,576 |
| <i>alr2300</i> | 1,433 | 2,258 | 1,576 |
| <i>alr3097</i> | 1,390 | 2,191 | 1,576 |
| <i>asr7330</i> | 1,390 | 2,191 | 1,576 |
| <i>all4179</i> | 1,376 | 2,169 | 1,576 |
| <i>all7316</i> | 1,327 | 2,092 | 1,576 |
| <i>alr4611</i> | 1,322 | 2,084 | 1,576 |
| <i>alr3188</i> | 1,312 | 2,068 | 1,576 |
| <i>asl1839</i> | 1,255 | 1,979 | 1,576 |
| <i>all2556</i> | 1,255 | 1,979 | 1,576 |
| <i>alr7321</i> | 1,255 | 1,979 | 1,576 |
| <i>asr7339</i> | 1,255 | 1,979 | 1,576 |
| <i>alr1209</i> | 1,249 | 1,969 | 1,576 |
| <i>alr1803</i> | 1,247 | 1,965 | 1,576 |
| <i>all7676</i> | 1,247 | 1,965 | 1,576 |
| <i>all2941</i> | 1,223 | 1,927 | 1,576 |
| <i>alr3202</i> | 1,208 | 1,904 | 1,576 |
| <i>all1838</i> | 1,204 | 1,897 | 1,576 |
| <i>all4541</i> | 1,204 | 1,897 | 1,576 |
| <i>asl0151</i> | 1,179 | 1,859 | 1,576 |
| <i>all2059</i> | 1,179 | 1,859 | 1,576 |
| <i>alr1656</i> | 1,128 | 1,778 | 1,576 |
| <i>all0385</i> | 1,107 | 1,745 | 1,576 |
| <i>all1866</i> | 1,052 | 1,658 | 1,576 |
| <i>petJ_1</i>  | 1,043 | 1,643 | 1,576 |
| <i>alr8531</i> | 1,043 | 1,643 | 1,576 |

|                |       |       |       |
|----------------|-------|-------|-------|
| <i>all9019</i> | 1,030 | 1,624 | 1,576 |
| <i>alr0758</i> | 1,024 | 1,615 | 1,576 |
| <i>alr0898</i> | 1,024 | 1,615 | 1,576 |
| <i>alr2205</i> | 1,024 | 1,615 | 1,576 |
| <i>alr0303</i> | 1,015 | 1,600 | 1,576 |
| <i>alr4921</i> | 1,007 | 1,587 | 1,576 |
| <i>all3039</i> | 0,973 | 1,534 | 1,576 |
| <i>alr4363</i> | 0,973 | 1,534 | 1,576 |
| <i>alr4601</i> | 0,965 | 1,521 | 1,576 |
| <i>all3677</i> | 0,927 | 1,461 | 1,576 |
| <i>all2685</i> | 0,898 | 1,416 | 1,576 |
| <i>minD_1</i>  | 0,888 | 1,400 | 1,576 |
| <i>alr2541</i> | 0,881 | 1,389 | 1,576 |
| <i>all4824</i> | 0,834 | 1,315 | 1,576 |
| <i>alr0014</i> | 0,817 | 1,287 | 1,576 |
| <i>alr2859</i> | 0,797 | 1,256 | 1,576 |
| <i>all2747</i> | 0,778 | 1,227 | 1,576 |
| <i>all0954</i> | 0,768 | 1,211 | 1,576 |
| <i>all0984</i> | 0,768 | 1,211 | 1,576 |
| <i>alr8555</i> | 0,768 | 1,211 | 1,576 |
| <i>all2661</i> | 0,714 | 1,126 | 1,576 |
| <i>alr4241</i> | 0,708 | 1,115 | 1,576 |
| <i>alr7052</i> | 0,687 | 1,083 | 1,576 |
| <i>alr5332</i> | 0,683 | 1,076 | 1,576 |
| <i>alr5086</i> | 0,667 | 1,052 | 1,576 |
| <i>all1642</i> | 0,621 | 0,979 | 1,576 |
| <i>all7055</i> | 0,618 | 0,974 | 1,576 |
| <i>alr1499</i> | 0,611 | 0,964 | 1,576 |
| <i>all2000</i> | 0,590 | 0,930 | 1,576 |
| <i>alr7334</i> | 0,578 | 0,911 | 1,576 |
| <i>all7120</i> | 0,572 | 0,902 | 1,576 |
| <i>alr2296</i> | 0,547 | 0,862 | 1,576 |
| <i>all2869</i> | 0,537 | 0,846 | 1,576 |
| <i>all7221</i> | 0,499 | 0,787 | 1,576 |
| <i>phnL</i>    | 0,482 | 0,761 | 1,576 |
| <i>all2910</i> | 0,479 | 0,754 | 1,576 |
| <i>all7218</i> | 0,477 | 0,751 | 1,576 |
| <i>alr7299</i> | 0,441 | 0,695 | 1,576 |
| <i>alr0922</i> | 0,434 | 0,684 | 1,576 |
| <i>alr7546</i> | 0,422 | 0,664 | 1,576 |
| <i>all5246</i> | 0,417 | 0,657 | 1,576 |
| <i>all4324</i> | 0,411 | 0,648 | 1,576 |

|                |        |        |       |
|----------------|--------|--------|-------|
| <i>alr2837</i> | 0,359  | 0,566  | 1,576 |
| <i>alr0691</i> | 0,354  | 0,558  | 1,576 |
| <i>alr3474</i> | 0,353  | 0,556  | 1,576 |
| <i>all0562</i> | 0,316  | 0,497  | 1,576 |
| <i>all5322</i> | 0,283  | 0,446  | 1,576 |
| <i>nifE</i>    | 0,243  | 0,383  | 1,576 |
| <i>hetM</i>    | 0,230  | 0,363  | 1,576 |
| <i>alr0357</i> | 0,215  | 0,338  | 1,576 |
| <i>alr1584</i> | 0,179  | 0,283  | 1,576 |
| <i>all4664</i> | 11,413 | 17,991 | 1,576 |
| <i>alr2766</i> | 6,427  | 10,132 | 1,576 |
| <i>all3048</i> | 6,427  | 10,132 | 1,576 |
| <i>tpiA</i>    | 6,272  | 9,887  | 1,576 |
| <i>asl2519</i> | 6,066  | 9,561  | 1,576 |
| <i>all4101</i> | 4,561  | 7,190  | 1,576 |
| <i>alr2709</i> | 4,429  | 6,981  | 1,576 |
| <i>asl4177</i> | 4,324  | 6,817  | 1,576 |
| <i>all1161</i> | 4,230  | 6,669  | 1,576 |
| <i>all7259</i> | 3,322  | 5,237  | 1,576 |
| <i>all3148</i> | 3,214  | 5,066  | 1,576 |
| <i>all0015</i> | 3,177  | 5,008  | 1,576 |
| <i>all3462</i> | 3,132  | 4,936  | 1,576 |
| <i>alr0717</i> | 3,100  | 4,886  | 1,576 |
| <i>asr1532</i> | 3,033  | 4,781  | 1,576 |
| <i>alr1360</i> | 2,802  | 4,417  | 1,576 |
| <i>alr0520</i> | 2,684  | 4,231  | 1,576 |
| <i>coxC_3</i>  | 2,324  | 3,663  | 1,576 |
| <i>asr5289</i> | 2,162  | 3,408  | 1,576 |
| <i>all3704</i> | 2,025  | 3,192  | 1,576 |
| <i>alr4277</i> | 2,022  | 3,187  | 1,576 |
| <i>leuD</i>    | 1,726  | 2,720  | 1,576 |
| <i>alr1677</i> | 1,662  | 2,620  | 1,576 |
| <i>alr3611</i> | 1,589  | 2,504  | 1,576 |
| <i>all4399</i> | 1,589  | 2,504  | 1,576 |
| <i>asl3928</i> | 1,516  | 2,390  | 1,576 |
| <i>asl4047</i> | 1,516  | 2,390  | 1,576 |
| <i>asl1218</i> | 1,478  | 2,330  | 1,576 |
| <i>all3861</i> | 1,478  | 2,330  | 1,576 |
| <i>asr4093</i> | 1,424  | 2,245  | 1,576 |
| <i>alr4486</i> | 1,418  | 2,236  | 1,576 |
| <i>asl0399</i> | 1,407  | 2,218  | 1,576 |
| <i>alr5259</i> | 1,407  | 2,218  | 1,576 |

|                |       |        |       |
|----------------|-------|--------|-------|
| <i>alr0944</i> | 1,342 | 2,116  | 1,576 |
| <i>all0463</i> | 1,297 | 2,045  | 1,576 |
| <i>all1610</i> | 1,297 | 2,045  | 1,576 |
| <i>all5278</i> | 1,239 | 1,953  | 1,576 |
| <i>alr3187</i> | 1,163 | 1,833  | 1,576 |
| <i>nadD</i>    | 1,162 | 1,831  | 1,576 |
| <i>all5195</i> | 1,115 | 1,757  | 1,576 |
| <i>all4003</i> | 1,021 | 1,610  | 1,576 |
| <i>alr0933</i> | 1,011 | 1,594  | 1,576 |
| <i>alr4167</i> | 0,938 | 1,478  | 1,576 |
| <i>all0976</i> | 0,934 | 1,472  | 1,576 |
| <i>all7360</i> | 0,865 | 1,363  | 1,576 |
| <i>all0997</i> | 0,852 | 1,343  | 1,576 |
| <i>alr1470</i> | 0,852 | 1,343  | 1,576 |
| <i>all7373</i> | 0,852 | 1,343  | 1,576 |
| <i>all2317</i> | 0,794 | 1,252  | 1,576 |
| <i>alr3623</i> | 0,794 | 1,252  | 1,576 |
| <i>all0291</i> | 0,753 | 1,187  | 1,576 |
| <i>alr4115</i> | 0,739 | 1,165  | 1,576 |
| <i>alr3296</i> | 0,675 | 1,064  | 1,576 |
| <i>all1188</i> | 0,654 | 1,031  | 1,576 |
| <i>alr0347</i> | 0,649 | 1,023  | 1,576 |
| <i>alr2240</i> | 0,593 | 0,934  | 1,576 |
| <i>all3987</i> | 0,593 | 0,934  | 1,576 |
| <i>alr4005</i> | 0,557 | 0,879  | 1,576 |
| <i>all0424</i> | 0,555 | 0,874  | 1,576 |
| <i>all3359</i> | 0,555 | 0,874  | 1,576 |
| <i>all1281</i> | 0,546 | 0,860  | 1,576 |
| <i>alr2841</i> | 0,492 | 0,775  | 1,576 |
| <i>all0621</i> | 0,446 | 0,703  | 1,576 |
| <i>all0207</i> | 0,438 | 0,691  | 1,576 |
| <i>alr3105</i> | 0,356 | 0,561  | 1,576 |
| <i>all2165</i> | 0,336 | 0,529  | 1,576 |
| <i>ddl</i>     | 0,320 | 0,504  | 1,576 |
| <i>all3028</i> | 0,320 | 0,504  | 1,576 |
| <i>all2292</i> | 0,297 | 0,468  | 1,576 |
| <i>alr1585</i> | 0,248 | 0,392  | 1,576 |
| <i>alr5353</i> | 0,204 | 0,322  | 1,576 |
| <i>alr1551</i> | 0,193 | 0,304  | 1,576 |
| <i>all4299</i> | 0,184 | 0,290  | 1,576 |
| <i>minE</i>    | 9,532 | 15,025 | 1,576 |
| <i>alr0088</i> | 5,838 | 9,203  | 1,576 |



|                |       |       |       |
|----------------|-------|-------|-------|
| <i>asr5071</i> | 3,649 | 5,752 | 1,576 |
| <i>alr5275</i> | 2,937 | 4,630 | 1,576 |
| <i>asr2448</i> | 2,715 | 4,280 | 1,576 |
| <i>all1814</i> | 2,458 | 3,875 | 1,576 |
| <i>all1863</i> | 2,433 | 3,835 | 1,576 |
| <i>alr1941</i> | 2,203 | 3,473 | 1,576 |
| <i>all3545</i> | 2,203 | 3,473 | 1,576 |
| <i>alr5220</i> | 2,142 | 3,377 | 1,576 |
| <i>all0623</i> | 2,071 | 3,265 | 1,576 |
| <i>alr0913</i> | 2,067 | 3,258 | 1,576 |
| <i>alr5103</i> | 1,984 | 3,127 | 1,576 |
| <i>alr0208</i> | 1,904 | 3,001 | 1,576 |
| <i>asl4865</i> | 1,824 | 2,876 | 1,576 |
| <i>alr5157</i> | 1,824 | 2,876 | 1,576 |
| <i>alr1589</i> | 1,810 | 2,854 | 1,576 |
| <i>all0373</i> | 1,743 | 2,747 | 1,576 |
| <i>asl4034</i> | 1,599 | 2,521 | 1,576 |
| <i>alr4166</i> | 1,528 | 2,409 | 1,576 |
| <i>alr1231</i> | 1,505 | 2,372 | 1,576 |
| <i>asr2953</i> | 1,460 | 2,301 | 1,576 |
| <i>all2099</i> | 1,363 | 2,149 | 1,576 |
| <i>alr2433</i> | 1,358 | 2,140 | 1,576 |
| <i>asr3387</i> | 1,358 | 2,140 | 1,576 |
| <i>asr5145</i> | 1,358 | 2,140 | 1,576 |
| <i>alr5178</i> | 1,317 | 2,076 | 1,576 |
| <i>alr5242</i> | 1,260 | 1,986 | 1,576 |
| <i>all8075</i> | 1,198 | 1,889 | 1,576 |
| <i>alr2614</i> | 1,071 | 1,689 | 1,576 |
| <i>all7600</i> | 1,033 | 1,629 | 1,576 |
| <i>ispD</i>    | 1,020 | 1,607 | 1,576 |
| <i>alr0645</i> | 0,981 | 1,547 | 1,576 |
| <i>all1034</i> | 0,942 | 1,484 | 1,576 |
| <i>all7262</i> | 0,871 | 1,374 | 1,576 |
| <i>all0891</i> | 0,828 | 1,305 | 1,576 |
| <i>all4051</i> | 0,828 | 1,305 | 1,576 |
| <i>all2598</i> | 0,819 | 1,292 | 1,576 |
| <i>alr4493</i> | 0,789 | 1,244 | 1,576 |
| <i>all4709</i> | 0,789 | 1,244 | 1,576 |
| <i>miaA</i>    | 0,789 | 1,244 | 1,576 |
| <i>nifH2</i>   | 0,784 | 1,235 | 1,576 |
| <i>gvpJ</i>    | 0,784 | 1,235 | 1,576 |
| <i>all2664</i> | 0,784 | 1,235 | 1,576 |

|                |          |          |       |
|----------------|----------|----------|-------|
| <i>alr3394</i> | 0,679    | 1,070    | 1,576 |
| <i>alr5212</i> | 0,679    | 1,070    | 1,576 |
| <i>all2720</i> | 0,643    | 1,014    | 1,576 |
| <i>all2053</i> | 0,638    | 1,006    | 1,576 |
| <i>alr4105</i> | 0,636    | 1,002    | 1,576 |
| <i>all2573</i> | 0,615    | 0,969    | 1,576 |
| <i>rfbC_1</i>  | 0,615    | 0,969    | 1,576 |
| <i>alr2742</i> | 0,613    | 0,966    | 1,576 |
| <i>all4143</i> | 0,608    | 0,959    | 1,576 |
| <i>all4444</i> | 0,608    | 0,959    | 1,576 |
| <i>all4928</i> | 0,599    | 0,944    | 1,576 |
| <i>all2002</i> | 0,596    | 0,939    | 1,576 |
| <i>all4844</i> | 0,596    | 0,939    | 1,576 |
| <i>cbiQ_2</i>  | 0,528    | 0,833    | 1,576 |
| <i>alr7224</i> | 0,528    | 0,833    | 1,576 |
| <i>alr2822</i> | 0,519    | 0,818    | 1,576 |
| <i>alr7094</i> | 0,517    | 0,814    | 1,576 |
| <i>alr1194</i> | 0,510    | 0,804    | 1,576 |
| <i>alr1008</i> | 0,367    | 0,579    | 1,576 |
| <i>alr3071</i> | 0,366    | 0,577    | 1,576 |
| <i>all4859</i> | 0,346    | 0,546    | 1,576 |
| <i>all2157</i> | 0,339    | 0,535    | 1,576 |
| <i>all1169</i> | 0,319    | 0,503    | 1,576 |
| <i>all1831</i> | 0,319    | 0,503    | 1,576 |
| <i>alr2824</i> | 0,319    | 0,502    | 1,576 |
| <i>all2290</i> | 0,274    | 0,432    | 1,576 |
| <i>nifN</i>    | 0,262    | 0,414    | 1,576 |
| <i>all2244</i> | 0,184    | 0,289    | 1,576 |
| <i>all2129</i> | 0,122    | 0,192    | 1,576 |
| <i>alr0681</i> | 0,000    | 1,587    | 1,587 |
| <i>all8004</i> | 0,000    | 1,587    | 1,587 |
| <i>alr2926</i> | 0,000    | 1,600    | 1,600 |
| <i>rrn16Sb</i> | 3371,091 | 5428,269 | 1,610 |
| <i>rrn16Sc</i> | 3340,509 | 5400,086 | 1,617 |
| <i>all2170</i> | 4,217    | 6,855    | 1,626 |
| <i>rrn16Sa</i> | 3316,278 | 5433,832 | 1,639 |
| <i>alr3482</i> | 0,000    | 1,658    | 1,658 |
| <i>alr2743</i> | 5,346    | 8,870    | 1,659 |
| <i>all3041</i> | 2,131    | 3,536    | 1,659 |
| <i>alr3619</i> | 0,000    | 1,668    | 1,668 |
| <i>all3436</i> | 0,000    | 1,673    | 1,673 |
| <i>alr5149</i> | 0,000    | 1,673    | 1,673 |

|                |        |        |       |
|----------------|--------|--------|-------|
| <i>recO</i>    | 6,290  | 10,535 | 1,675 |
| <i>all2023</i> | 2,587  | 4,350  | 1,681 |
| <i>alr3874</i> | 6,868  | 11,600 | 1,689 |
| <i>alr4848</i> | 3,860  | 6,592  | 1,708 |
| <i>all0513</i> | 6,832  | 11,748 | 1,720 |
| <i>all1116</i> | 0,000  | 1,731  | 1,731 |
| <i>ccmL</i>    | 11,447 | 19,849 | 1,734 |
| <i>alr0484</i> | 3,779  | 6,552  | 1,734 |
| <i>alr3514</i> | 3,879  | 6,726  | 1,734 |
| <i>all2631</i> | 1,604  | 2,781  | 1,734 |
| <i>all3989</i> | 1,290  | 2,237  | 1,734 |
| <i>alr2346</i> | 11,120 | 19,282 | 1,734 |
| <i>all3779</i> | 0,000  | 1,736  | 1,736 |
| <i>all5316</i> | 0,000  | 1,742  | 1,742 |
| <i>alr7582</i> | 0,000  | 1,747  | 1,747 |
| <i>alr3297</i> | 10,008 | 17,529 | 1,752 |
| <i>all2341</i> | 9,059  | 15,867 | 1,752 |
| <i>all2347</i> | 3,780  | 6,621  | 1,752 |
| <i>alr4320</i> | 3,700  | 6,481  | 1,752 |
| <i>bvdR</i>    | 3,253  | 5,698  | 1,752 |
| <i>trmE</i>    | 2,284  | 4,001  | 1,752 |
| <i>all4546</i> | 8,783  | 15,474 | 1,762 |
| <i>alr0239</i> | 11,641 | 20,574 | 1,767 |
| <i>all7080</i> | 0,000  | 1,770  | 1,770 |
| <i>all7177</i> | 3,766  | 6,679  | 1,773 |
| <i>all2521</i> | 2,919  | 5,177  | 1,773 |
| <i>alr0367</i> | 0,806  | 1,429  | 1,773 |
| <i>alr4784</i> | 10,564 | 18,844 | 1,784 |
| <i>kaiC</i>    | 3,368  | 6,017  | 1,787 |
| <i>all2509</i> | 1,817  | 3,246  | 1,787 |
| <i>alr5232</i> | 0,000  | 1,796  | 1,796 |
| <i>alr1942</i> | 7,568  | 13,634 | 1,802 |
| <i>recJ_2</i>  | 2,280  | 4,107  | 1,802 |
| <i>ycf55</i>   | 1,388  | 2,500  | 1,802 |
| <i>rplK</i>    | 21,379 | 38,885 | 1,819 |
| <i>all7659</i> | 2,074  | 3,772  | 1,819 |
| <i>all2635</i> | 0,969  | 1,763  | 1,819 |
| <i>all4237</i> | 0,000  | 1,822  | 1,822 |
| <i>lpxC</i>    | 4,986  | 9,170  | 1,839 |
| <i>alr1113</i> | 1,520  | 2,795  | 1,839 |
| <i>alr3813</i> | 9,158  | 16,842 | 1,839 |
| <i>alr5005</i> | 9,098  | 16,732 | 1,839 |

|                |        |        |       |
|----------------|--------|--------|-------|
| <i>all0173</i> | 7,198  | 13,237 | 1,839 |
| <i>alr4660</i> | 4,520  | 8,312  | 1,839 |
| <i>all4869</i> | 3,630  | 6,676  | 1,839 |
| <i>all0459</i> | 5,838  | 10,737 | 1,839 |
| <i>all5165</i> | 12,184 | 22,407 | 1,839 |
| <i>alr5209</i> | 5,389  | 9,911  | 1,839 |
| <i>alr0159</i> | 0,000  | 1,850  | 1,850 |
| <i>alr0882</i> | 9,456  | 17,498 | 1,851 |
| <i>groES</i>   | 19,086 | 35,396 | 1,855 |
| <i>all3838</i> | 2,792  | 5,177  | 1,855 |
| <i>asl2401</i> | 0,000  | 1,859  | 1,859 |
| <i>asl8549</i> | 0,000  | 1,859  | 1,859 |
| <i>all1220</i> | 3,916  | 7,295  | 1,863 |
| <i>asl2923</i> | 0,000  | 1,878  | 1,878 |
| <i>asr7252</i> | 0,000  | 1,878  | 1,878 |
| <i>all4885</i> | 0,000  | 1,891  | 1,891 |
| <i>alr3897</i> | 2,123  | 4,016  | 1,892 |
| <i>bioD</i>    | 2,583  | 4,886  | 1,892 |
| <i>all4680</i> | 2,041  | 3,861  | 1,892 |
| <i>asr2819</i> | 6,868  | 12,992 | 1,892 |
| <i>all4544</i> | 5,406  | 10,225 | 1,892 |
| <i>all8030</i> | 6,736  | 12,742 | 1,892 |
| <i>alr1545</i> | 4,561  | 8,628  | 1,892 |
| <i>hisA</i>    | 4,526  | 8,561  | 1,892 |
| <i>all3859</i> | 1,796  | 3,398  | 1,892 |
| <i>alr4046</i> | 1,738  | 3,287  | 1,892 |
| <i>alr5117</i> | 1,707  | 3,229  | 1,892 |
| <i>alr1146</i> | 1,377  | 2,605  | 1,892 |
| <i>all2133</i> | 5,260  | 9,949  | 1,892 |
| <i>all7105</i> | 2,354  | 4,453  | 1,892 |
| <i>all7302</i> | 2,354  | 4,453  | 1,892 |
| <i>rplS</i>    | 12,478 | 23,885 | 1,914 |
| <i>asr7146</i> | 0,000  | 1,917  | 1,917 |
| <i>all5016</i> | 11,506 | 22,167 | 1,927 |
| <i>all3788</i> | 4,397  | 8,471  | 1,927 |
| <i>all1704</i> | 4,379  | 8,436  | 1,927 |
| <i>alr1295</i> | 3,878  | 7,471  | 1,927 |
| <i>all1130</i> | 0,000  | 1,937  | 1,937 |
| <i>menA</i>    | 4,896  | 9,500  | 1,940 |
| <i>all4986</i> | 4,834  | 9,379  | 1,940 |
| <i>alr8502</i> | 0,000  | 1,948  | 1,948 |
| <i>alr5124</i> | 0,000  | 1,958  | 1,958 |

|                |       |        |       |
|----------------|-------|--------|-------|
| <i>asl0815</i> | 7,413 | 14,608 | 1,970 |
| <i>all8031</i> | 3,360 | 6,621  | 1,970 |
| <i>all5166</i> | 2,347 | 4,625  | 1,970 |
| <i>all2969</i> | 1,610 | 3,173  | 1,970 |
| <i>asl3129</i> | 4,916 | 9,687  | 1,970 |
| <i>all1411</i> | 3,766 | 7,422  | 1,970 |
| <i>all4892</i> | 2,044 | 4,028  | 1,970 |
| <i>rimM</i>    | 1,891 | 3,726  | 1,970 |
| <i>alr3906</i> | 1,650 | 3,252  | 1,970 |
| <i>trpC_1</i>  | 1,605 | 3,162  | 1,970 |
| <i>thrA</i>    | 1,086 | 2,140  | 1,970 |
| <i>all4433</i> | 0,903 | 1,780  | 1,970 |
| <i>all2444</i> | 0,696 | 1,372  | 1,970 |
| <i>all4940</i> | 6,625 | 13,054 | 1,970 |
| <i>alr4534</i> | 3,565 | 7,025  | 1,970 |
| <i>all7198</i> | 3,013 | 5,937  | 1,970 |
| <i>all3111</i> | 2,273 | 4,478  | 1,970 |
| <i>alr0288</i> | 2,094 | 4,127  | 1,970 |
| <i>alr2559</i> | 1,521 | 2,998  | 1,970 |
| <i>all4024</i> | 0,971 | 1,913  | 1,970 |
| <i>all3045</i> | 0,923 | 1,819  | 1,970 |
| <i>alr2739</i> | 0,789 | 1,555  | 1,970 |
| <i>alr4939</i> | 9,532 | 18,781 | 1,970 |
| <i>alr4637</i> | 2,780 | 5,478  | 1,970 |
| <i>alr4853</i> | 6,904 | 13,721 | 1,988 |

---

**Table D. Main genes involved in iron uptake showing  $\geq 2$ -fold change in expression in the *furA*-turning off strain AGcoaRFurA**

| <b>ORF</b>     | <b>Symbol<sup>a</sup></b> | <b>Protein description<sup>a</sup></b>                                     | <b>Fold change</b> |
|----------------|---------------------------|----------------------------------------------------------------------------|--------------------|
| <i>alr0397</i> | <i>schT</i>               | schizokinen outer membrane transporter SchT                                | -2.02              |
| <i>all2585</i> | <i>fecD1</i>              | iron(III) dicitrate transport system permease protein                      | -2.54              |
| <i>all1101</i> |                           | ferrichrome iron receptor (SchT homologue)                                 | -6.66              |
| <i>all2148</i> |                           | ferrichrome iron receptor                                                  | -2.54              |
| <i>all2158</i> |                           | ferrichrome iron receptor                                                  | -2.54              |
| <i>alr2185</i> |                           | ferrichrome iron receptor                                                  | -2.25              |
| <i>all2236</i> |                           | ferrichrome iron receptor                                                  | -5.07              |
| <i>alr2588</i> |                           | ferrichrome iron receptor                                                  | -3.81              |
| <i>alr2610</i> |                           | ferrichrome iron receptor                                                  | -2.10              |
| <i>all4924</i> |                           | ferrichrome iron receptor                                                  | -5.71              |
| <i>alr1382</i> | <i>futA1</i>              | ABC transporter, ferric iron-binding periplasmic protein FutA1 orthologue) | -3.81              |
| <i>alr1383</i> | <i>futB</i>               | iron(III) ABC transporter, permease protein (FutB orthologue)              | -2.22              |
| <i>alr1384</i> | <i>futC</i>               | ABC transporter ATP-binding protein                                        | -2.54              |
| <i>alr2209</i> |                           | ferric aerobactin receptor                                                 | -4.44              |
| <i>all2158</i> |                           | ferrichrome-iron receptor                                                  | -2.54              |
| <i>all3310</i> |                           | TonB-dependent receptor                                                    | 2.76               |
| <i>all2610</i> |                           | ferrichrome-iron receptor                                                  | 2.10               |

<sup>a</sup>Gene symbol and protein description according to the cyanobacteria genome database CyanoBase (<http://genome.microbedb.jp/cyanobase>).

**Table E. Strains and plasmids used in this study**

| Strain or plasmid   | Characteristics                                                                                                                                                                                                                                          | Source or reference                                                |
|---------------------|----------------------------------------------------------------------------------------------------------------------------------------------------------------------------------------------------------------------------------------------------------|--------------------------------------------------------------------|
| Strains             |                                                                                                                                                                                                                                                          |                                                                    |
| <i>E. coli</i>      |                                                                                                                                                                                                                                                          |                                                                    |
| DH5 $\alpha$        | F <sup>-</sup> $\phi$ 80 <i>lacZ</i> $\Delta$ M15 $\Delta$ ( <i>lacZYA-argF</i> )U169 <i>recA1 endA1 hsdR17</i> (rK <sup>-</sup> , mK <sup>+</sup> ) <i>phoA supE44 thi-1 gyrA96 relA1</i> $\lambda$ <sup>-</sup> , for cloning and maintaining plasmids | Thermo Fisher Scientific                                           |
| ED8654              | F <sup>-</sup> <i>e14</i> <sup>-</sup> ( <i>mcrA</i> <sup>-</sup> ) <i>recA 56 lac-3 o lacY1 galK2 galT22 glnV44 supF58 metB1 hsdR514</i> (rK <sup>-</sup> mK <sup>+</sup> ) <i>trpR55</i> , for triparental conjugation                                 | Institute of Plant Biochemistry and Photosynthesis, Seville, Spain |
| CPB1893             | <i>mcrA</i> <sup>-</sup> <i>mcrB</i> <sup>-</sup> M. <i>EcoK</i> <sup>+</sup> R. <i>EcoK</i> <sup>-</sup> , for triparental conjugation                                                                                                                  | Institute of Plant Biochemistry and Photosynthesis, Seville, Spain |
| BL21(DE3)           | <i>ompT hsdS<sub>B</sub></i> (r <sub>B</sub> <sup>-</sup> m <sub>B</sub> <sup>-</sup> ) <i>gal dcm</i> (DE3), for expression and purification of recombinant FurA                                                                                        | EMD Biosciences                                                    |
| <i>Anabaena</i> sp. |                                                                                                                                                                                                                                                          |                                                                    |
| PCC 7120            | Wild-type                                                                                                                                                                                                                                                | Pasteur Institute, Paris, France                                   |
| AG2770FurA          | PCC 7120 harboring pAM2770FurA, overexpresses FurA                                                                                                                                                                                                       | González et al., 2010                                              |
| AGcoaRfurA          | PCC 7120 with natural promoter of <i>furA</i> replaced by locus <i>coaR-P<sub>coaT</sub></i> from <i>Synechocystis</i> sp. PCC 6803, depleted expression of <i>furA</i> in BG-11 <sub>-Co/Zn</sub> medium                                                | This study                                                         |
| Plasmids            |                                                                                                                                                                                                                                                          |                                                                    |
| pGEM-T              | Cloning vector, Amp <sup>r</sup>                                                                                                                                                                                                                         | Promega                                                            |
| pCoaR1              | pGEM-T vector harboring the native 2-kb sequence from the upstream region of the <i>furA</i> gene                                                                                                                                                        | This study                                                         |
| pAM2770FurA         | pAM2770 vector containing <i>furA</i> expressed from <i>petE</i> promoter, Km <sup>r</sup> /Nm <sup>r</sup>                                                                                                                                              | González et al., 2010                                              |
| pCoaR2              | pAM2770FurA vector harboring the <i>coaR-P<sub>coaT</sub></i> locus from <i>Synechocystis</i> sp. PCC 6803                                                                                                                                               | This study                                                         |
| pCoaR3              | pCoaR1 vector harbouring the fusion fragment <i>coaR-P<sub>coaT</sub>::furA</i>                                                                                                                                                                          | This study                                                         |

|           |                                                                                                                                                                                |                    |
|-----------|--------------------------------------------------------------------------------------------------------------------------------------------------------------------------------|--------------------|
| pCoaR4    | pGEM-T vector harboring the native 2-kb sequence from the downstream region of the <i>furA</i> gene                                                                            | This study         |
| pCoaR5    | pCoaR3 vector harboring the native 2-kb sequence from the downstream region of the <i>furA</i> gene                                                                            | This study         |
| pCoaR6    | pCoaR5 vector harboring the Km/Nm-resistance transcription unit from pAM2770FurA                                                                                               | This study         |
| pRL278    | Suicide vector; Km <sup>r</sup> /Nm <sup>r</sup>                                                                                                                               | Black et al., 1993 |
| pCoaRFurA | Suicide vector containing the fusion fragment <i>coaR</i> -P <sub><i>coaT</i></sub> :: <i>furA</i> flanked by the 2-kb upstream and downstream regions of the <i>furA</i> gene | This study         |
| pRL443    | Conjugal plasmid; Amp <sup>r</sup> Tc <sup>r</sup> ; Km <sup>s</sup> derivative of RP-4                                                                                        | Elhai et al., 1997 |
| pRL623    | Conjugation helper plasmid; Cm <sup>r</sup> ; Mob <sub>ColK</sub> , M· <i>AvaII</i> , M· <i>Eco47II</i> , M· <i>EcoT221</i>                                                    | Elhai et al., 1997 |
| pET28a    | Expression vector, Km <sup>r</sup>                                                                                                                                             | EMD Biosciences    |

---



**Table F. Oligonucleotides used in this study**

| <b>Primer</b>      | <b>Sequence 5' - 3'</b>           |
|--------------------|-----------------------------------|
| <i>Cloning</i>     |                                   |
| 2770FurA-coaR-P_up | CCCTCGAGCTAAAGACAAGTGAGATAGC      |
| 2770FurAcoaR-P_dw  | GGAATTCATATGGCTTTTTAACTTGGATTTTAC |
| PpetEfurA1         | AGATCTCTCATCACTACTCATCATCCCC      |
| PpetEfurA2         | CTCGAGTAATGTATAAACTCCAATCACAAGG   |
| PpetEfurA3         | GGATCCGGTAAGATAACAAGAGGAAGTACTC   |
| PpetEfurA4         | GAGCTCCTATTATCAATTTCAAGGTGGTTAAC  |
| Km/Nm_up           | CCCTCGAGGCTACTGGGCTATCTGGAC       |
| Km/Nm_dw           | CCCTCGAGGTCCCGCTCAGAAGAAC         |
| <i>EMSA</i>        |                                   |
| P1_asl2914-up      | GTGCGGCTTTTGCCTACGC               |
| P1_asl2914-dw      | CAAGCCACTGGACAAGCATCTACG          |
| P2_asl2914-up      | GTCAGCGACTCACCTAAGCG              |
| P2_asl2914-dw      | CCAACGGTGAAACACTTGTTGTAAC         |
| Pas10884-up        | CTTCGATCCTCTGGTCGATGTTC           |
| Pas10884-dw        | CCATTGCCTTAAGCCGCAG               |
| Pas10885-up        | GAAAGTGTGAATCAGCATAGGTTTTAGAG     |
| Pas10885-dw        | CGACCAGAGGATCGAAGATTTG            |
| Pall4148-up        | GCTGCCTCCGACTCTTAATATAATCC        |
| Pall4148-dw        | GGTTGCCATTTCTGTAATCCTCTC          |
| Pall0801-up        | GGTTTAGGGGTGTAAGGGTTTAGG          |

|                  |                               |
|------------------|-------------------------------|
| Pall0801-dw      | CGGTAATATCTTCAGTAGTGCCTTGG    |
| Pasr0847-46-up   | CCAGCCTGGAGCCACTTTACC         |
| Pasr0847-46-dw   | GGTCGGATAATTCTCTGCTAGGAGG     |
| P1_asr3848-up    | CGATCGCCTCAATGCAGTTTATTC      |
| P1_asr3848-dw    | CGACGACCCACAGGGGAATTC         |
| P2_asr3848-46-up | CCGAGATGTAGAAGAAGTGGCAGC      |
| P2_asr3848-46-dw | GGTGACGATATCGGAAAACGG         |
| Pasr1283-up      | GAGGTAGGGGTGTGGCAATACG        |
| Pasr1283-dw      | GCCGGTATTAGCAACTGGGG          |
| P1_alr3397-up    | GCAATATTGATAATCTCAGCTAACGTATG |
| P1_alr3397-dw    | GTCAAGCCAGTAGAGTTTATCCACTC    |
| P2_alr3397-up    | CTCAAGCCTGCTGGTTTACGC         |
| P2_alr3397-dw    | GCTTCACCATACGTTAGCTGAGATTATC  |
| P1_alr3146-47-up | CCCAAGGTGTGGGCAGAATTG         |
| P1_alr3146-47-dw | CCAAACGTCCCTCCTCTGGTG         |
| P2_alr3146-47-up | GTATCTGTGGGGATACTGGAACAATAG   |
| P2_alr3146-47-dw | CCAGAGAACCAACGATTCCCTCTTG     |
| P3_alr3146-47-up | CTCCTTCTACGTCATATATGATATCCG   |
| P3_alr3146-47-dw | CTATTGTTCCAGTATCCCCACAGATAC   |
| Palr3422-up      | CAGCGCCCACACATTTGTACTAC       |
| Palr3422-dw      | GTAGTAGTTGTGACCCATGCCTTTG     |
| Pall1512-up      | GCGTATTGCTGGTGACAGCTTTAG      |
| Pall1512-dw      | CGTCTTGATAGGGATGGACTTTTCG     |
| Pall1365-up      | GCGATACGCTGAATCAGAATTTTCAG    |
| Pall1365-dw      | GAGGGTGACAACAATCAAACCAAG      |

|                   |                                |
|-------------------|--------------------------------|
| P1_alr4685-86-up  | CAAGTTGAGGAACTTCACAATCTATTAG   |
| P1_alr4685-86-dw  | CATTGAAGCGCATAGTCTTGTAGAAC     |
| P2_alr4685-86-up  | GCGGTTGATACACAGCTTATTTAC       |
| P2_alr4685-86-dw  | GCTAATAGATTGTGAAGTTTCCTCAACTTG |
| P3_alr4685-86-up  | GGATACCTAGTGGCATAGTTAGTACAG    |
| P3_alr4685-86-dw  | GTGAAATAAGCTGTGTATCAACCG       |
| Palr2392-93-94-up | CTGTTGAAAAGCTGTAACGTGGC        |
| Palr2392-93-94-dw | GCGCCAATCGGCCAAATC             |
| Pall1291-up       | CCTGTAACAGAGTTTGCCTAATTTCC     |
| Pall1291-dw       | GTCTTGATGATTGGTATTGGTAAGGG     |
| Pall3735-up       | CAGCCCCTGGTAGATGTAATAAGTCTTG   |
| Pall3735-dw       | CCTTTAGAGCCAGATTTGCCG          |
| P1_alr1105-04-up  | GCTACGCTTTACAAGACAAAGTATGGG    |
| P1_alr1105-04-dw  | CCTGCACTAGTCACAGCGATATTATC     |
| P2_alr1105-04-up  | GTTCTGGTATCAGTCGATAGTAAATCCAAG |
| P2_alr1105-04-dw  | GGCTACGTGTGTTTTTCATAACGG       |
| P1_all0450-up     | CAGCATCTGCATTGAGAATCGAC        |
| P1_all0450-dw     | GGCACGCAGAAGAATCTCAGC          |
| P2_all0450-up     | GGCTGAGATTCTGCGTGC             |
| P2_all0450-dw     | GTAGCGGCCTATTAACCTTGTTTC       |
| P1_all3549-up     | GCAAGACGTGAAGTTGTTTCTATGG      |
| P1_all3549-dw     | CCTCATCTTCTGAAGCTCCCGTC        |
| P2_all3549-up     | GGTTGTAGCTGTACTGGCTTGAGTTG     |
| P2_all3549-dw     | CATCAATCGCTGAGTTTGCAGAG        |
| Pall3653-up       | GCTAAGGTAGCGACGATTCTTGTTTC     |

|               |                                |
|---------------|--------------------------------|
| Pall3653-dw   | GTCAGTTGTCAATTGTTTCGTTGTGAAG   |
| Palr3814-up   | GGCTTTAGGACAGACTGTGGGC         |
| Palr3814-dw   | CCGCACGTAGGCGATCGCCC           |
| P1_sufBCDS-up | GGGCTGTTGCCTGTGAGTGTTTC        |
| P1_sufBCDS-dw | GCCGTACTIONGTAAGGTTGGTTGAC     |
| P2_sufBCDS-up | GCTACCGATGGAGTTTGCGG           |
| P2_sufBCDS-dw | GCAGGATGTCCCGCCAACAC           |
| P3_sufBCDS-up | GCAACCGTCAGCCAGTTGGAAGATG      |
| P3_sufBCDS-dw | CGATGTCGCCGCGTTATCTAG          |
| Palr4908-up   | GCCCATCGTGGTGAAGAGATTAC        |
| Palr4908-dw   | GGGCGAATGCTGGTGAATACG          |
| Pall3272-up   | CGGTATTGATAGCCATTCCTGC         |
| Pall3272-dw   | GAAGGGAGTTTAACTTACAAAGACAGTCAG |
| Palr3195-up   | GCGTAGGTGCAATGTTATATTGAG       |
| Palr3195-dw   | CGTACAAATGTAAGTTTTCCATGTAAAG   |
| Palr7354-up   | GACAGCGCCATAAGTACCAGCAG        |
| Palr7354-dw   | GATGCCTAACTCTTCAAGTAGCCATAGC   |
| Pasl4146-up   | GTTGCCACGGGGCAATGG             |
| Pasl4146-dw   | CCGATGCGCCTGTCAATCC            |
| Pall0177-up   | GGGGCTTGGAATCGCTCATAG          |
| Pall0177-dw   | CTGACCGCAGTTCGTCACCG           |
| Palr3090-up   | GGACTACTCAGCAGAAGCAGAAGTG      |
| Palr3090-dw   | GCTGCTGATAGTTCTCCTGTCGC        |
| Pall5185-up   | CTCATCCACTGGGCGGACG            |
| Pall5185-dw   | GTCGTGCCACAATTATCAAAATGG       |

|                |                                |
|----------------|--------------------------------|
| Palr0799-up    | CTGAAGCCATCCACGCCTTAG          |
| Palr0799-dw    | GGAACACCCAAAGTATTGAGAATCTG     |
| P1_asr0941-up  | CCAAACGCTCAGGTTAACACCAG        |
| P1_asr0941-dw  | GTACCCCAAGCCAAACTCCAAAG        |
| P2_asr0941-up  | CTCATCCGTGCCAACATCGTC          |
| P2_asr0941-dw  | GTAGCTTAGATCGATGACTGGTGTTAACC  |
| P1_asr4517-up  | GAACAGTTTTGAATAGGTAG           |
| P1_asr4517-dw  | CATAACAGACTCCTAAAAGAC          |
| P2_asr4517-up  | CTCAGCAATTTGTTCAACCTGAGC       |
| P2_asr4517-dw  | CTGGTATATAACCCAAGTCTGCTAGAG    |
| Pall3135-up    | GCCTACCTTCTGGATACTTGCAATAG     |
| Pall3135-dw    | GGTCATGGGTAATTAGTAATGGGTAAGTAG |
| Palr7386-up    | GCGCTCAATTACACCCCGC            |
| Palr7386-dw    | CGGCGGCGAAGTAATAGACG           |
| P1_asr7385-up  | GCATTCTTGGCTTGTGCCG            |
| P1_asr7385-dw  | GCTGAATCTGGTAATAGATGACTTAGCAC  |
| P2_asr7385-up  | GCCTCTCACACTCTACGTCTATTACTTCG  |
| P2_asr7385-dw  | CGGCACAAGCCAAGAATGC            |
| Palr1010-up    | CTCCATTAATTTGGTGTCAATATTATTCAC |
| Palr1010-dw    | CGTCGCGTTCTACACTGGCC           |
| Palr3513-up    | CCCATTCCCGATTTTGGCG            |
| Palr3513-dw    | CCGGGAGTTTATCAGTTTCTGGG        |
| Palr5007_up    | GGTCTAGGGATGATAGTTGTATTCCAG    |
| Palr5007_dw    | CACCTTGAGGAGGATTGATAGTC        |
| Pall7348-P1_up | CTGGTGGGAGTTATTGGATAACCACTG    |

|                |                                |
|----------------|--------------------------------|
| Pall7348-P1_dw | GCTGATGATTGCTATGGCAAGG         |
| Pall7348-P2_up | CCTTGCCATAGCAATCATCAGC         |
| Pall7348-P2_dw | GCGATCGCCTAAAAC TTTAC          |
| Pall2097_up    | GGA ACTCTACCACCGCTACTGGATAC    |
| Pall2097_dw    | CTAGTATCAAGTGA ACTTAGATCATTGGG |
| Palr3707_up    | GACA ACTGACA ACTGACCATTGATC    |
| Palr3707_dw    | GGGAATGGAAGTAAGTGACATATTCTATTC |
| Palr2945_up    | GGCGCGCCTTTACGTTTAGC           |
| Palr2945_dw    | CTATAGCGTCCGGGCATCATTTC        |
| Palr0034_up    | CTACGACGACATGGTGAAACTGTC       |
| Palr0034_dw    | GCTTTGTAGTCATCAGTTGTGGTAAGC    |
| Palr3356-P1_up | CTGTAGGCATTGCCACCTTACGTA       |
| Palr3356-P1_dw | GAACTAGGATCAAATTCTGCGTGAG      |
| Palr3356-P2_up | GCCATAGCAATACTGTTCCATTTG       |
| Palr3356-P2_dw | GAACAATCCTGTTAGGAATAATCAG      |
| Pall4936_up    | GGAAACTGCCGCCAAATTG            |
| Pall4936_dw    | CAAAGCTGAGATTATCAGCAACTTGAG    |
| Pall1649-47_up | GCAATAGGTTCCATCTTATAAATCCG     |
| Pall1649-47_dw | CAACTACCCA ACTATTGCTCAATTGG    |
| Pall1647_up    | CGCTTGCTGAATAATCTGATAATAGGG    |
| Pall1647_dw    | CGTCAAGCCCTCCTGAATTGC          |
| Palr2679-80_up | GCAGTGATGGTTTGCTGACACAATC      |
| Palr2679-80_dw | GTCGTTGGCGGTTAATCATTATGC       |
| Palr2680_up    | CCCCAGAACCCCAAACCGAAC          |
| Palr2680_dw    | CGGGGGTGTCTGCACCTCC            |

|                |                               |
|----------------|-------------------------------|
| Pall4026-P1_up | CAAGGCTGCCCCACACTCC           |
| Pall4026-P1_dw | GTGCCTGATCTACTTACTTTGCTCTGC   |
| Pall4026-P2_up | GCAGAGCAAAGTAAGTAGATCAGGCAC   |
| Pall4026-P2_dw | GCTGGGGCGATCGCATAACTTAAG      |
| Pall4026-P3_up | GTTATGCGATCGCCCCAGC           |
| Pall4026-P3_dw | GACGCTATGAGATAGTGATCCTCTTTAAG |
| Pall1847-48_up | GCGGAAGTCATGACCGTAGTATTG      |
| Pall1847-48_dw | GCGCTGGAAGAATTAATCAATTACTAC   |
| Palr1450-49_up | CGTCGGCTCAATAGCTCATGG         |
| Palr1450-49_dw | CTGTAGCCATCTGGCGCTTCC         |
| Palr3100-P1_up | CCAATCCCTGGGGGTATGTCATGG      |
| Palr3100-P1_dw | GCGCTCAACGGTGGTAATTCCC        |
| Palr3100-P2_up | CTAGTTCACCCCTTAAGGCAGACTC     |
| Palr3100-P2_dw | GAAGTCATGTTGATGTGAGCTGCC      |
| Pall2566_up    | GCACAAGTCGCCCGATACG           |
| Pall2566_dw    | CCCAACACGGCGAAGATATGC         |
| Pall1681_up    | GGACGTGGTGACGATTCCAAG         |
| Pall1681_dw    | CAATGGTGGCTGTAACACTTGGTAC     |
| Pasr8504_up    | CCAGGAATTGCTCAAGCATGAG        |
| Pasr8504_dw    | GGTGGTTGATGCCGGAATCC          |
| Pall3033-P1_up | GCACCCATTCCGTCATAACTAGAAAG    |
| Pall3033-P1_dw | CGCTTCGGTTGTGTAAGTACAGAGTTG   |
| Pall3033-P2_up | CGAACACATCAACGAGAAGCAGG       |
| Pall3033-P2_dw | CTCATCCACGCGACAGGTCTG         |
| Palr1358_up    | GGTCAGCAATACTGTGTGATTTGC      |

|               |                               |
|---------------|-------------------------------|
| Palr1358_dw   | CTGGGGGTTTTGATTCCTGG          |
| <i>RT-PCR</i> |                               |
| Alr2679-RT_up | CAGCCCCCAACGGTACAGC           |
| Alr2679-RT_dw | GGGGTGGGTGTCGTAAAGTTCC        |
| Alr2680-RT_up | CCTTCTACCACAACAACCCCGC        |
| Alr2680-RT_dw | CGCCAAATACAGCCCCTAATGC        |
| Alr0799-RT_up | GGTTTTTCATGAAGGGAACCAAATTG    |
| Alr0799-RT_dw | GAAGCTAAAGCAACTTCCACTAATTGC   |
| Asl4146-RT_up | GCTAAGTGCATCTTCAAAACACTACGTG  |
| Asl4146-RT_dw | GGTTAGGGTACAAGAGGTTCCATTAAACC |
| All5185-RT_up | GTGGGGTAGGGATGAATCACGTTAC     |
| All5185-RT_dw | CGGCATTGAACAAGCTGGATATC       |
| Alr3090-RT_up | GGTGGAGCGACAGGAGAACTATCAG     |
| Alr3090-RT_dw | GCTGGCTCAGAGTTCCAAGGG         |
| Alr3356-RT_up | GTTCTCCAGCGTCTTGTCCAGACAATG   |
| Alr3356-RT_dw | GCTCCTGCCTGCATCAATTCTATG      |
| Asr4517-RT_up | GAACCAACCAATCGAATTGTCATTAG    |
| Asr4517-RT_dw | GCCGGAGTGGAACCAGAATCTAAG      |
| Asr7385-RT_up | GGCGTCCGCAAGAGCGTAG           |
| Asr7385-RT_dw | GTTAGGTTGAGATTGGAAAGTGAGAAC   |
| Asr7386-RT_up | CTGGAAAATTGCATTCTTGACGAG      |
| Asr7386-RT_dw | GGTCTCTTACATTGGTCAGTCTTTCTG   |
| All3135-RT_up | CCGAGCATCGCTGCTCAGG           |
| All3135-RT_dw | GGAACGCTCATTAACGACGCAC        |
| Alr2495-RT_up | CCCTTGCAGATAAAGTCCGCG         |



|               |                              |
|---------------|------------------------------|
| Alr2495-RT_dw | GCGATCGCTTCCCCAATTGC         |
| Alr4686-RT_up | GCGAAGACAACCTCCTTATGCCCTC    |
| Alr4686-RT_dw | CCACGTACACCACCACCAAATGG      |
| All7348-RT_up | GGTACTTCGTAACCTCCCTGCCAC     |
| All7348-RT_dw | CTCATGTGTCGCCATCATGGTTG      |
| Alr1010-RT_up | GGCCAGTGTAGAACGCGACG         |
| Alr1010-RT_dw | CCCCTAGCTAACCAATATAACCAATCAG |

---

**Table G. Summary of sequencing run statistics**

|                                            |                             |           |
|--------------------------------------------|-----------------------------|-----------|
| Sample A ( <i>Anabaena</i> sp. AGcoaRFurA) | Total number of bases [Mbp] | 635       |
|                                            | % of Q30 bases              | 95,9      |
|                                            | Final library reads         | 4,234,002 |
| Sample B ( <i>Anabaena</i> sp. PCC 7120)   | Total number of bases [Mbp] | 1,034     |
|                                            | % of Q30 bases              | 96,06     |
|                                            | Final library reads         | 6,890,192 |
